# Supplementary material for: A mechanistic insight into sources of error of visual working memory in multiple sclerosis
Source: eLife. 2023 Nov 8;12:RP87442. doi: 10.7554/eLife.87442 (PMC10631758; doi:10.7554/eLife.87442)
Supplement: Source data 1. [file elife-87442-data1.xlsx]

## Sheet: Healthy
Subject_ID	Block_Number	Distance (pixel)	Delay_Interval	Reaction_Time (seconds)	Target_location (x_axis)	Target_location (y_axis)	Subject_response (x_axis)	Subject_response (y_axis)	Response error (pixel)		Pixel per visual degree (code in MATLAB)
1	1	200	1	2.35668	444	196	441	200	5		screen_resolution = 1024;
1	1	100	2	2.00617	478	290	472	286	7.2111		screen_width = 28.4cm; distance from monitor = 48cm
1	1	100	8	2.3609	418	418	409	449	32.28		pixel_per_degree = screen_resolution * (1 ./ (2 * atan2(screen_width / 2, distance from monitor))) * pi/180;
1	1	200	2	1.69079	685	484	718	525	52.6308
1	1	300	8	1.53921	705	614	748	662	64.4438
1	1	300	0.5	1.55515	230	487	224	530	43.4166
1	1	200	8	1.91563	547	581	558	628	48.2701
1	1	200	0.5	2.32305	359	513	342	546	37.1214
1	1	100	0.5	1.85164	529	286	529	289	3
1	1	300	4	1.35104	230	487	199	524	48.2701
1	1	300	2	1.65319	217	332	195	337	22.561
1	1	100	2	0.880827	462	471	446	483	20
1	1	100	1	2.42508	589	320	610	324	21.3776
1	1	100	4	2.5159	495	286	488	288	7.28011
1	1	100	4	1.99448	495	482	489	516	34.5254
1	1	200	8	1.73617	580	196	595	202	16.1555
1	1	300	4	1.08104	362	124	347	113	18.6011
1	1	100	1	1.02556	529	482	535	508	26.6833
1	1	200	1	1.60512	700	452	710	466	17.2047
1	1	300	8	1.35223	319	154	271	95	76.0592
1	1	300	0.5	1.90212	460	89	465	77	13
1	1	100	1	1.24156	599	334	590	327	11.4018
1	1	200	0.5	1.17194	700	452	720	483	36.8917
1	1	300	2	1.91274	807	332	845	332	38
1	1	100	4	1.6118	435	320	413	321	22.0227
1	1	200	4	1.45802	612	557	649	599	55.9732
1	1	300	2	1.17822	282	191	273	162	30.3645
1	1	200	8	1.56421	612	557	628	630	74.7329
1	1	200	0.5	1.07592	580	196	597	175	27.0185
1	1	300	1	2.05741	615	666	597	698	36.7151
1	2	100	2	1.28434	418	418	414	429	11.7047
1	2	300	0.5	0.69499	282	191	240	161	51.614
1	2	100	8	2.00457	589	320	612	313	24.0416
1	2	300	4	1.36636	564	89	542	80	23.7697
1	2	200	8	1.97233	709	349	726	364	22.6716
1	2	200	1	1.77093	700	316	712	321	13
1	2	200	0.5	1.34729	665	255	668	251	5
1	2	100	1	1.38481	546	478	546	509	31
1	2	100	2	1.59576	462	471	450	480	15
1	2	200	4	1.65016	477	581	453	595	27.7849
1	2	100	2	1.70225	546	290	558	262	30.4631
1	2	100	1	1.53882	610	401	608	429	28.0713
1	2	300	4	2.21325	615	102	605	94	12.8062
1	2	300	0.5	1.50153	230	487	170	591	120.067
1	2	100	4	1.74729	448	461	424	471	26
1	2	200	8	0.833326	339	284	319	264	28.2843
1	2	100	1	1.11528	495	482	497	508	26.0768
1	2	300	4	1.3173	282	577	253	593	33.121
1	2	200	2	1.48302	700	452	720	480	34.4093
1	2	200	2	1.6358	547	581	568	616	40.8167
1	2	300	8	1.17927	807	332	835	306	38.2099
1	2	300	4	1.11794	362	644	327	659	38.0789
1	2	300	8	1.89095	409	666	360	650	51.5461
1	2	100	1	1.29127	610	401	614	397	5.65685
1	2	200	0.5	1.12485	547	187	546	163	24.0208
1	2	100	1	1.17125	576	461	590	502	43.3244
1	2	300	2	1.24108	230	281	191	239	57.3149
1	2	300	0.5	1.32274	772	234	791	203	36.3593
1	2	200	0.5	1.21039	641	231	616	236	25.4951
1	2	200	8	1.49779	641	231	577	218	65.307
1	3	100	0.5	1.00489	529	286	518	287	11.0454
1	3	200	0.5	1.56046	339	284	332	287	7.61577
1	3	300	0.5	0.96536	615	102	643	78	36.8782
1	3	300	1	0.652448	282	577	239	641	77.1038
1	3	100	8	1.19955	478	290	441	280	38.3275
1	3	200	4	1.57051	324	316	344	299	26.2488
1	3	200	2	0.817411	547	187	544	186	3.16228
1	3	100	8	1.59135	589	320	590	296	24.0208
1	3	100	2	1.21511	606	350	596	339	14.8661
1	3	300	4	1.6217	662	124	669	121	7.61577
1	3	100	0.5	0.995177	414	367	385	434	73.0068
1	3	200	1	1.10513	315	419	290	442	33.9706
1	3	100	1	1.1699	425	434	419	445	12.53
1	3	200	8	0.991737	580	572	575	590	18.6815
1	3	200	4	1.12706	641	231	621	170	64.195
1	3	300	2	1.13996	615	102	608	83	20.2485
1	3	200	0.5	1.31676	685	484	692	549	65.3758
1	3	200	8	1.1939	412	211	386	191	32.8024
1	3	100	4	1.08892	414	367	393	390	31.1448
1	3	300	2	1.39348	230	487	195	551	72.9452
1	3	200	4	1.1988	412	557	407	578	21.587
1	3	300	8	1.36241	564	89	569	87	5.38516
1	3	300	0.5	1.68783	230	281	202	274	28.8617
1	3	100	4	1.57401	435	448	422	482	36.4005
1	3	200	1	0.980427	359	513	319	568	68.0074
1	3	300	1	1.55988	615	666	643	645	35
1	3	100	1	0.81085	576	307	579	309	3.60555
1	3	300	8	1.528	252	234	193	208	64.4748
1	3	100	2	1.24967	478	290	468	278	15.6205
1	3	300	2	1.10266	742	191	694	174	50.9215
1	4	100	4	0.958128	576	307	572	294	13.6015
1	4	200	1	1.40052	665	513	686	566	57.0088
1	4	300	2	1.29041	807	436	803	454	18.4391
1	4	100	0.5	1.19792	414	367	416	369	2.82843
1	4	200	2	1.1482	709	419	747	443	44.9444
1	4	300	0.5	1.276	807	436	751	441	56.2228
1	4	100	1	1.16033	462	471	457	471	5
1	4	100	8	1.17776	478	290	427	273	53.7587
1	4	200	2	1.28436	665	513	718	581	86.2148
1	4	200	8	1.51745	665	255	685	223	37.7359
1	4	100	2	1.20197	610	401	608	444	43.0465
1	4	100	2	0.982329	546	290	541	279	12.083
1	4	100	1	1.00891	599	434	618	473	43.382
1	4	100	1	0.738681	425	434	399	457	34.7131
1	4	300	1	0.901604	662	644	661	639	5.09902
1	4	300	8	1.17704	615	102	636	102	21
1	4	200	4	0.979331	641	537	648	589	52.469
1	4	200	0.5	1.44856	709	349	704	337	13
1	4	100	0.5	1.25617	425	334	396	324	30.6757
1	4	200	4	1.23476	685	284	688	268	16.2788
1	4	200	4	1.24919	412	211	450	216	38.3275
1	4	300	4	1.71014	615	666	605	644	24.1661
1	4	300	8	1.83072	252	234	207	222	46.5725
1	4	300	4	0.978608	282	577	230	604	58.5918
1	4	300	8	1.11705	564	679	574	656	25.0799
1	4	300	2	1.29758	362	124	327	107	38.9102
1	4	100	0.5	1.07167	495	286	481	271	20.5183
1	4	200	1	0.877384	315	419	268	489	84.3149
1	4	300	0.5	1.06722	230	281	201	268	31.7805
1	4	200	8	1.18768	444	572	371	600	78.1857
1	5	100	2	0.970138	425	334	410	331	15.2971
1	5	200	0.5	1.39398	477	581	496	623	46.0977
1	5	300	8	1.29639	742	191	694	201	49.0306
1	5	100	4	0.878999	546	290	555	279	14.2127
1	5	300	1	1.13005	409	102	395	109	15.6525
1	5	200	4	1.17913	324	452	398	465	75.1332
1	5	200	2	1.1841	383	231	417	255	41.6173
1	5	300	0.5	3.89094	772	534	793	588	57.9396
1	5	200	2	1.1394	665	255	642	273	29.2062
1	5	200	8	1.54662	665	513	736	525	72.0069
1	5	200	8	1.72578	547	581	599	554	58.5918
1	5	300	1	2.09134	409	666	383	695	38.9487
1	5	200	1	0.845128	709	419	707	435	16.1245
1	5	100	4	1.27647	529	482	535	484	6.32456
1	5	100	0.5	1.01867	529	482	536	480	7.28011
1	5	100	8	1.36983	529	482	538	485	9.48683
1	5	200	2	1.21592	547	187	547	164	23
1	5	100	8	1.02995	606	350	612	337	14.3178
1	5	200	2	1.17989	383	537	330	581	68.884
1	5	100	0.5	1.0069	599	334	600	323	11.0454
1	5	100	2	0.705584	462	297	457	293	6.40312
1	5	300	8	1.48983	564	679	585	708	35.805
1	5	300	1	1.40244	460	679	425	651	44.8219
1	5	100	0.5	1.2419	414	367	415	372	5.09902
1	5	300	1	1.43228	230	487	218	514	29.5466
1	5	300	4	1.45136	282	191	254	244	59.9416
1	5	200	4	0.959062	444	196	413	190	31.5753
1	5	100	4	1.20185	418	418	390	438	34.4093
1	5	300	0.5	1.26146	705	614	744	660	60.3075
1	5	300	1	1.10151	460	679	452	706	28.1603
1	6	100	8	1.11845	610	367	613	359	8.544
1	6	100	0.5	0.986693	599	334	604	326	9.43398
1	6	300	8	1.60933	409	666	388	693	34.2053
1	6	100	2	0.818833	599	334	603	322	12.6491
1	6	200	8	1.24246	359	513	366	522	11.4018
1	6	100	8	1.49036	529	286	517	260	28.6356
1	6	100	1	0.978759	478	290	481	296	6.7082
1	6	300	8	1.58098	282	191	252	177	33.1059
1	6	200	0.5	1.46699	383	231	375	227	8.94427
1	6	300	4	1.66506	742	191	771	188	29.1548
1	6	200	4	1.0833	641	231	648	228	7.61577
1	6	200	2	1.76946	685	284	688	290	6.7082
1	6	200	4	1.18601	685	284	695	276	12.8062
1	6	300	1	1.56326	460	679	441	715	40.7063
1	6	200	0.5	1.09107	339	484	314	487	25.1794
1	6	100	0.5	0.862048	414	401	416	400	2.23607
1	6	200	8	1.13325	685	284	686	271	13.0384
1	6	300	0.5	1.80907	794	487	815	516	35.805
1	6	300	1	0.772986	615	666	644	652	32.2025
1	6	300	4	0.954232	564	89	571	88	7.07107
1	6	200	1	1.33175	339	284	318	276	22.4722
1	6	300	2	0.983763	217	332	181	352	41.1825
1	6	200	4	1.28866	324	452	301	472	30.4795
1	6	200	1	0.98519	580	572	606	595	34.7131
1	6	100	2	1.17103	478	478	482	465	13.6015
1	6	100	2	0.881368	418	350	420	357	7.28011
1	6	100	4	1.09791	435	448	439	440	8.94427
1	6	300	1	1.33728	772	234	789	211	28.6007
1	6	300	0.5	1.37972	282	577	300	570	19.3132
1	6	100	2	1.22872	495	286	494	270	16.0312
2	1	300	2	1.87616	794	487	759	510	41.8808
2	1	200	4	1.80792	612	557	635	573	28.0179
2	1	100	1	1.75534	425	334	423	301	33.0606
2	1	100	4	1.66923	448	461	442	464	6.7082
2	1	300	8	2.44172	409	666	356	681	55.0818
2	1	100	4	2.03989	610	401	614	422	21.3776
2	1	300	8	1.65521	794	487	872	595	133.222
2	1	100	0.5	1.94904	478	478	489	485	13.0384
2	1	200	8	2.16255	700	316	725	541	226.385
2	1	300	1	1.70936	705	154	688	130	29.4109
2	1	300	2	1.18954	772	234	791	206	33.8378
2	1	200	0.5	1.15035	665	255	673	225	31.0483
2	1	100	0.5	0.718986	495	482	491	465	17.4642
2	1	300	0.5	1.00663	230	281	240	248	34.4819
2	1	200	1	1.32115	383	231	370	222	15.8114
2	1	200	2	1.27031	641	537	660	587	53.4883
2	1	100	1	1.11435	546	290	553	301	13.0384
2	1	100	0.5	1.44655	606	350	618	336	18.4391
2	1	300	8	1.7771	409	102	679	376	384.676
2	1	200	4	1.13276	412	557	370	555	42.0476
2	1	200	0.5	2.6481	324	316	308	298	24.0832
2	1	300	2	1.4047	705	154	740	161	35.6931
2	1	200	2	1.13505	477	187	447	146	50.8035
2	1	300	4	1.87223	742	577	744	578	2.23607
2	1	200	4	1.25148	709	349	707	338	11.1803
2	1	200	8	1.87261	612	211	631	208	19.2354
2	1	100	2	1.28457	599	434	614	461	30.8869
2	1	100	1	1.84432	478	290	464	268	26.0768
2	1	100	1	1.02804	414	401	404	406	11.1803
2	1	300	8	1.41529	217	332	164	337	53.2353
2	2	200	8	1.34116	444	196	269	300	203.571
2	2	100	0.5	1.19747	610	367	606	361	7.2111
2	2	300	4	1.50113	807	332	782	305	36.7967
2	2	200	1	1.72839	444	196	403	182	43.3244
2	2	100	8	2.0416	589	448	570	454	19.9249
2	2	100	0.5	7.78851	562	471	631	272	210.623
2	2	200	1	1.25084	612	211	612	204	7
2	2	300	2	1.00715	362	124	308	106	56.921
2	2	300	2	1.52218	362	644	355	628	17.4642
2	2	200	0.5	0.98401	547	187	532	192	15.8114
2	2	100	8	1.13937	418	418	389	430	31.3847
2	2	300	4	1.44976	217	332	167	328	50.1597
2	2	300	4	0.973025	409	102	365	94	44.7214
2	2	100	8	1.07538	478	290	432	293	46.0977
2	2	200	8	0.807738	359	513	573	291	308.35
2	2	100	1	1.09053	546	478	567	530	56.0803
2	2	100	0.5	0.893117	589	320	605	306	21.2603
2	2	200	0.5	9.02652	641	537	264	232	484.927
2	2	300	8	1.56662	742	191	733	215	25.632
2	2	200	1	1.02122	412	557	406	516	41.4367
2	2	200	2	1.36318	709	419	716	413	9.21954
2	2	100	4	1.41011	425	334	436	333	11.0454
2	2	100	2	1.68073	606	418	614	434	17.8885
2	2	300	2	1.17818	282	191	262	174	26.2488
2	2	200	1	1.47599	685	284	698	253	33.6155
2	2	300	4	1.08089	252	534	279	511	35.4683
2	2	300	1	1.60236	252	534	240	548	18.4391
2	2	300	2	1.59011	807	436	826	432	19.4165
2	2	100	4	1.30751	606	350	597	335	17.4929
2	2	200	0.5	1.96583	685	284	682	262	22.2036
2	3	100	4	1.02625	425	334	422	327	7.61577
2	3	100	8	1.0604	546	478	544	495	17.1172
2	3	200	2	1.23006	612	211	640	145	71.6938
2	3	200	2	1.25609	700	316	639	420	120.569
2	3	100	8	1.08506	495	286	490	252	34.3657
2	3	200	4	1.90153	359	255	328	224	43.8406
2	3	100	0.5	3.06699	418	350	401	343	18.3848
2	3	300	8	1.171	252	234	179	237	73.0616
2	3	100	8	1.0422	546	290	543	270	20.2237
2	3	300	1	1.3538	794	487	799	508	21.587
2	3	200	0.5	1.32485	412	557	405	558	7.07107
2	3	100	4	0.930043	495	482	475	472	22.3607
2	3	200	0.5	0.951044	383	537	375	529	11.3137
2	3	200	4	1.29128	383	537	380	540	4.24264
2	3	300	0.5	4.51851	662	124	702	244	126.491
2	3	200	2	1.731	665	255	653	261	13.4164
2	3	100	1	1.15772	562	471	592	480	31.3209
2	3	200	0.5	1.12111	709	349	726	330	25.4951
2	3	300	8	1.15222	615	102	651	125	42.72
2	3	300	2	0.783647	460	679	463	532	147.031
2	3	100	1	2.05044	599	434	608	441	11.4018
2	3	200	1	1.08661	339	284	314	243	48.0208
2	3	300	4	1.55195	794	281	813	271	21.4709
2	3	300	2	1.22481	615	102	610	85	17.72
2	3	300	4	1.39668	409	102	366	73	51.8652
2	3	100	0.5	0.788912	606	418	612	454	36.4966
2	3	300	2	1.22815	319	154	294	163	26.5707
2	3	100	1	1.19247	589	320	596	332	13.8924
2	3	300	1	2.31786	772	234	751	214	29
2	3	200	8	1.739	700	316	733	287	43.9318
2	4	200	0.5	2.10997	709	349	677	361	34.176
2	4	100	2	0.997769	435	448	438	437	11.4018
2	4	200	8	1.09223	359	513	393	463	60.4649
2	4	200	1	1.16932	383	537	303	584	92.7847
2	4	100	2	1.25772	448	307	392	286	59.808
2	4	300	8	1.23955	807	332	776	324	32.0156
2	4	100	1	0.8473	495	286	483	303	20.8087
2	4	100	2	1.34721	576	307	585	288	21.0238
2	4	300	1	1.65942	662	124	708	88	58.4123
2	4	100	8	1.63428	546	478	515	490	33.2415
2	4	300	2	1.24156	319	154	271	149	48.2597
2	4	100	0.5	0.690898	576	461	605	478	33.6155
2	4	300	0.5	1.14996	362	644	354	618	27.2029
2	4	300	8	1.17965	615	666	567	495	177.609
2	4	300	4	1.62158	319	154	321	103	51.0392
2	4	300	4	2.16943	409	102	400	58	44.911
2	4	200	4	1.67195	477	187	460	189	17.1172
2	4	100	2	1.08279	495	482	460	492	36.4005
2	4	300	0.5	1.78983	230	281	230	285	4
2	4	200	8	1.54047	444	196	416	164	42.5206
2	4	200	2	1.35363	547	187	580	135	61.5873
2	4	200	1	1.29978	580	196	604	139	61.8466
2	4	300	8	1.34559	772	534	802	556	37.2022
2	4	100	0.5	1.45612	576	461	581	446	15.8114
2	4	200	4	1.01184	359	513	335	547	41.6173
2	4	200	1	1.26727	641	537	653	553	20
2	4	100	1	1.20504	606	418	605	417	1.41421
2	4	200	4	1.36775	412	211	390	208	22.2036
2	4	300	0.5	1.36765	564	89	556	63	27.2029
2	4	100	4	0.973984	495	286	479	281	16.7631
2	5	200	1	1.0691	444	196	388	139	79.9062
2	5	200	0.5	1.18015	665	255	630	273	39.3573
2	5	300	2	3.47843	230	487	336	401	136.499
2	5	100	0.5	1.00369	414	367	398	339	32.249
2	5	100	2	0.934809	529	286	582	283	53.0848
2	5	100	8	1.00149	606	418	600	427	10.8167
2	5	100	8	1.33207	529	286	533	254	32.249
2	5	300	0.5	1.27116	705	154	741	117	51.6236
2	5	300	8	1.09847	230	487	172	502	59.9083
2	5	200	1	2.36743	412	211	384	199	30.4631
2	5	100	4	1.05516	414	367	586	248	209.153
2	5	300	2	1.05741	772	234	735	226	37.855
2	5	200	2	1.12299	315	349	265	314	61.0328
2	5	300	4	1.46313	662	644	689	659	30.8869
2	5	300	4	1.18449	217	332	257	345	42.0595
2	5	200	0.5	1.27656	477	187	482	192	7.07107
2	5	200	0.5	0.922954	580	572	568	574	12.1655
2	5	200	2	1.58368	580	572	571	572	9
2	5	100	1	0.859349	462	471	434	537	71.6938
2	5	200	2	1.13022	383	231	376	226	8.60233
2	5	100	8	1.45951	414	367	393	374	22.1359
2	5	300	8	1.49936	217	436	199	480	47.5395
2	5	100	1	1.20009	462	297	453	299	9.21954
2	5	200	1	2.26064	315	349	316	354	5.09902
2	5	300	4	1.09944	319	154	283	215	70.8308
2	5	300	4	1.32884	807	332	819	288	45.607
2	5	100	8	1.48121	599	434	612	445	17.0294
2	5	100	4	1.10718	414	401	394	414	23.8537
2	5	300	0.5	3.31095	319	614	296	697	86.1278
2	5	200	1	2.08737	641	231	660	199	37.2156
2	6	200	1	1.73447	477	187	459	181	18.9737
2	6	100	1	1.19218	495	482	477	486	18.4391
2	6	100	2	1.42257	610	367	621	362	12.083
2	6	200	0.5	1.43604	700	316	707	283	33.7343
2	6	200	0.5	1.71843	685	284	694	256	29.4109
2	6	100	4	0.970952	599	434	623	427	25
2	6	200	0.5	0.763925	477	581	465	567	18.4391
2	6	300	0.5	1.29126	564	89	558	60	29.6142
2	6	100	4	2.28483	414	367	412	334	33.0606
2	6	200	4	1.20473	412	211	380	206	32.3883
2	6	300	1	1.55258	705	614	717	684	71.0211
2	6	300	8	1.30642	409	102	352	98	57.1402
2	6	200	2	1.01196	641	537	625	534	16.2788
2	6	100	1	0.833845	562	471	558	489	18.4391
2	6	300	4	1.49716	742	191	752	200	13.4536
2	6	300	2	3.69664	319	154	351	491	338.516
2	6	200	8	0.955377	359	255	297	194	86.977
2	6	300	4	1.20463	662	124	658	107	17.4642
2	6	300	2	1.27261	460	89	468	84	9.43398
2	6	100	4	1.02806	435	320	425	298	24.1661
2	6	300	8	1.41513	807	332	824	329	17.2627
2	6	300	0.5	1.24041	564	89	581	65	29.4109
2	6	100	8	1.23185	562	471	575	480	15.8114
2	6	200	1	1.22082	477	581	463	569	18.4391
2	6	200	2	1.1627	685	484	698	500	20.6155
2	6	100	8	1.02976	589	448	647	473	63.1585
2	6	100	1	1.04786	606	418	626	446	34.4093
2	6	300	2	2.7733	252	234	276	196	44.9444
2	6	100	8	1.00975	462	297	463	240	57.0088
2	6	200	0.5	1.31084	709	419	719	448	30.6757
3	1	100	4	2.50521	435	448	428	443	8.60233
3	1	200	4	2.68901	477	581	435	587	42.4264
3	1	300	1	2.25596	742	191	801	191	59
3	1	200	1	3.10832	685	484	661	469	28.3019
3	1	100	8	3.84389	478	290	467	299	14.2127
3	1	300	4	3.50055	217	332	258	298	53.2635
3	1	200	2	2.32909	547	581	592	544	58.258
3	1	300	0.5	2.97283	282	577	278	627	50.1597
3	1	100	2	2.15437	462	297	445	295	17.1172
3	1	300	0.5	3.29441	252	534	240	577	44.643
3	1	100	8	3.32238	546	290	560	273	22.0227
3	1	100	2	1.70619	435	320	423	310	15.6205
3	1	100	1	2.15279	546	478	554	498	21.5407
3	1	100	1	2.11514	599	434	604	442	9.43398
3	1	200	8	3.50833	665	255	663	234	21.095
3	1	300	2	1.68656	252	534	234	565	35.8469
3	1	200	4	2.2772	700	316	723	312	23.3452
3	1	200	2	2.2996	412	557	417	605	48.2597
3	1	300	2	2.23276	230	281	241	288	13.0384
3	1	100	0.5	1.98815	462	297	461	295	2.23607
3	1	300	8	3.19511	362	644	365	701	57.0789
3	1	300	1	2.38569	662	644	675	680	38.2753
3	1	200	4	2.9162	547	187	575	201	31.305
3	1	300	0.5	2.89906	282	577	279	648	71.0634
3	1	200	8	2.40711	665	513	725	502	61
3	1	100	4	3.65023	495	482	509	490	16.1245
3	1	300	1	2.52826	794	281	847	286	53.2353
3	1	200	8	1.67108	444	572	445	604	32.0156
3	1	100	0.5	1.41393	610	367	617	362	8.60233
3	1	200	0.5	2.38453	709	349	736	332	31.9061
3	2	300	0.5	2.27837	217	436	215	473	37.054
3	2	200	0.5	1.82757	665	255	704	250	39.3192
3	2	300	8	1.73576	319	154	352	184	44.5982
3	2	200	8	1.77664	477	187	479	205	18.1108
3	2	200	4	1.75447	359	255	367	246	12.0416
3	2	100	2	1.79758	478	478	481	487	9.48683
3	2	300	2	2.17157	705	614	732	646	41.8688
3	2	300	4	2.04938	319	154	339	159	20.6155
3	2	100	1	2.3112	495	286	508	298	17.6918
3	2	300	2	2.90237	794	487	811	512	30.2324
3	2	300	1	2.64334	794	487	822	524	46.4004
3	2	100	1	2.5641	562	471	583	470	21.0238
3	2	100	2	1.62544	589	320	596	312	10.6301
3	2	200	8	1.34849	444	572	439	597	25.4951
3	2	200	8	1.67434	641	231	670	249	34.1321
3	2	200	0.5	1.8214	547	581	569	584	22.2036
3	2	100	1	2.90011	610	367	621	362	12.083
3	2	300	0.5	2.33077	794	487	794	507	20
3	2	200	4	2.25279	612	211	646	226	37.1618
3	2	300	1	2.5919	282	577	301	649	74.4648
3	2	100	2	1.82646	599	434	598	425	9.05539
3	2	300	4	1.78575	230	487	234	496	9.84886
3	2	200	4	2.36594	477	187	482	195	9.43398
3	2	100	0.5	2.42069	606	418	625	418	19
3	2	300	8	1.94098	252	534	242	555	23.2594
3	2	200	2	0.482605	339	484	498	420	171.397
3	2	100	8	2.09107	576	461	612	446	39
3	2	100	4	1.18696	562	297	586	302	24.5153
3	2	100	0.5	2.39731	589	448	592	447	3.16228
3	2	200	1	1.6636	612	557	618	573	17.088
3	3	200	1	1.33438	477	187	475	180	7.28011
3	3	100	4	2.06318	562	297	576	309	18.4391
3	3	300	0.5	4.0419	615	102	619	101	4.12311
3	3	100	2	2.10604	562	471	578	464	17.4642
3	3	300	4	1.53794	662	644	657	663	19.6469
3	3	100	1	2.53159	589	320	592	319	3.16228
3	3	100	0.5	1.67255	462	471	453	481	13.4536
3	3	200	0.5	2.20163	547	581	558	609	30.0832
3	3	300	8	2.00552	615	666	613	719	53.0377
3	3	300	1	3.73606	409	666	394	710	46.4866
3	3	100	1	1.37	448	307	457	317	13.4536
3	3	100	0.5	1.76907	610	401	645	423	41.3401
3	3	300	1	2.86446	230	487	242	490	12.3693
3	3	100	4	1.21718	546	478	555	479	9.05539
3	3	200	2	2.55236	444	572	463	581	21.0238
3	3	300	2	1.859	807	436	837	451	33.541
3	3	300	8	1.64145	252	234	276	231	24.1868
3	3	300	2	2.69115	705	154	711	160	8.48528
3	3	100	2	2.538	425	434	433	434	8
3	3	300	8	2.17022	217	332	245	308	36.8782
3	3	200	4	1.77857	547	581	571	597	28.8444
3	3	100	4	1.55521	529	482	551	479	22.2036
3	3	100	0.5	1.93514	478	290	487	295	10.2956
3	3	200	8	1.48937	665	513	684	573	62.9365
3	3	200	0.5	1.82783	547	581	546	590	9.05539
3	3	200	2	1.46271	339	284	364	301	30.2324
3	3	200	8	1.67067	641	231	642	243	12.0416
3	3	200	1	1.38628	315	419	322	414	8.60233
3	3	300	8	2.58607	742	191	739	192	3.16228
3	3	200	4	1.88047	359	513	371	526	17.6918
3	4	200	4	1.59161	665	513	667	537	24.0832
3	4	300	0.5	3.11967	615	102	634	87	24.2074
3	4	300	1	3.02909	252	234	250	239	5.38516
3	4	300	8	2.45661	362	124	368	96	28.6356
3	4	100	4	1.8579	562	297	563	286	11.0454
3	4	200	4	1.66422	580	196	589	186	13.4536
3	4	300	8	1.87209	409	102	432	91	25.4951
3	4	300	2	1.52523	564	679	575	724	46.3249
3	4	100	1	2.34584	478	290	489	310	22.8254
3	4	100	0.5	1.81087	435	448	436	459	11.0454
3	4	100	2	2.06095	435	320	429	308	13.4164
3	4	100	1	2.35775	529	482	537	477	9.43398
3	4	200	0.5	2.73795	709	349	737	350	28.0179
3	4	200	2	1.51555	339	284	337	281	3.60555
3	4	100	8	2.86367	599	434	624	432	25.0799
3	4	200	4	4.57693	709	419	741	418	32.0156
3	4	300	8	2.27452	794	281	823	286	29.4279
3	4	200	8	2.18996	444	196	452	192	8.94427
3	4	300	2	1.61416	252	234	243	227	11.4018
3	4	100	0.5	2.1429	599	434	596	426	8.544
3	4	100	4	1.9011	610	401	621	399	11.1803
3	4	200	4	2.22671	547	581	567	607	32.8024
3	4	100	2	1.81247	435	448	438	469	21.2132
3	4	300	8	4.23469	564	89	579	72	22.6716
3	4	300	1	3.73825	807	436	794	427	15.8114
3	4	200	1	2.12376	324	316	333	310	10.8167
3	4	200	0.5	1.67536	477	581	484	623	42.5793
3	4	200	0.5	1.26981	383	231	401	236	18.6815
3	4	300	2	2.44332	705	614	703	673	59.0339
3	4	100	1	1.891	495	286	498	282	5
3	5	300	0.5	1.78913	217	332	206	327	12.083
3	5	100	1	1.54031	529	482	534	486	6.40312
3	5	200	4	2.33775	685	484	704	474	21.4709
3	5	100	1	1.4263	425	434	423	445	11.1803
3	5	100	1	1.39774	435	320	441	314	8.48528
3	5	200	4	1.51629	477	581	473	618	37.2156
3	5	300	4	2.38571	807	332	869	320	63.1506
3	5	300	8	2.43832	564	679	575	705	28.2312
3	5	100	8	1.66177	546	290	555	289	9.05539
3	5	300	2	2.69171	564	679	559	701	22.561
3	5	200	8	2.59721	665	513	672	504	11.4018
3	5	300	0.5	2.12461	362	124	356	120	7.2111
3	5	100	0.5	1.98101	546	290	554	290	8
3	5	300	4	2.09507	615	666	627	686	23.3238
3	5	200	1	1.6508	641	537	646	529	9.43398
3	5	300	8	2.36723	230	281	249	281	19
3	5	200	0.5	1.78341	612	557	613	575	18.0278
3	5	200	2	3.14676	612	557	622	550	12.2066
3	5	300	2	1.92703	807	332	827	333	20.025
3	5	100	4	1.87079	589	320	579	326	11.6619
3	5	300	8	1.45	252	534	241	573	40.5216
3	5	300	2	1.50839	409	666	408	690	24.0208
3	5	200	2	1.79741	665	513	660	509	6.40312
3	5	200	0.5	1.81046	477	581	480	620	39.1152
3	5	100	2	2.01823	606	350	627	349	21.0238
3	5	200	4	2.00118	665	255	679	270	20.5183
3	5	100	0.5	1.58255	589	320	593	323	5
3	5	200	1	2.37618	477	581	472	589	9.43398
3	5	100	8	2.96355	448	307	443	309	5.38516
3	5	100	1	1.81047	448	461	451	462	3.16228
3	6	300	0.5	2.11813	615	666	633	707	44.7772
3	6	300	1	2.67479	705	614	714	620	10.8167
3	6	200	8	1.84734	547	187	545	198	11.1803
3	6	200	8	2.49001	612	557	632	597	44.7214
3	6	200	2	2.34697	641	537	655	550	19.105
3	6	100	2	1.78423	562	297	570	308	13.6015
3	6	300	2	2.44392	772	534	786	584	51.923
3	6	300	4	2.01837	319	614	327	640	27.2029
3	6	100	4	1.21757	462	471	473	464	13.0384
3	6	300	8	1.84197	742	191	759	190	17.0294
3	6	300	0.5	5.12997	460	89	484	77	26.8328
3	6	200	4	2.21265	709	419	644	440	68.3081
3	6	200	1	2.51595	665	255	683	269	22.8035
3	6	200	2	2.64786	700	316	712	325	15
3	6	100	8	1.80458	610	367	638	371	28.2843
3	6	300	1	2.08658	564	679	574	705	27.8568
3	6	100	1	1.34314	546	478	564	479	18.0278
3	6	100	2	2.4129	546	478	565	478	19
3	6	100	1	2.06116	589	448	598	456	12.0416
3	6	100	0.5	1.19179	414	401	414	411	10
3	6	300	4	3.61014	615	666	627	727	62.1691
3	6	200	8	1.13594	709	419	722	436	21.4009
3	6	100	4	0.370546	478	478	505	413	70.3847
3	6	200	0.5	1.84596	339	284	361	303	29.0689
3	6	300	0.5	2.02798	282	577	280	624	47.0425
3	6	200	8	1.57493	641	537	653	562	27.7308
3	6	100	0.5	1.76483	599	434	594	422	13
3	6	100	4	1.72181	589	320	595	323	6.7082
3	6	300	1	1.83192	217	332	219	334	2.82843
3	6	200	2	1.37094	359	255	376	264	19.2354
4	1	200	0.5	1.47072	412	211	408	217	7.2111
4	1	300	4	1.76573	230	487	236	543	56.3205
4	1	100	1	1.66771	529	286	521	295	12.0416
4	1	200	0.5	1.62675	612	211	596	223	20
4	1	300	8	2.17695	705	154	708	199	45.0999
4	1	200	4	2.17632	612	557	625	592	37.3363
4	1	200	2	2.70764	612	557	645	625	75.5844
4	1	200	1	1.46819	547	187	550	204	17.2627
4	1	100	2	1.52564	589	320	590	321	1.41421
4	1	300	0.5	4.97233	362	644	340	687	48.3011
4	1	100	4	1.39338	414	401	415	419	18.0278
4	1	300	1	1.7993	409	666	391	714	51.264
4	1	200	8	2.6821	359	255	379	277	29.7321
4	1	300	2	2.33132	362	124	375	122	13.1529
4	1	100	0.5	1.48669	495	482	503	510	29.1204
4	1	200	1	2.08735	412	211	416	226	15.5242
4	1	200	2	1.57672	685	284	709	284	24
4	1	100	0.5	1.94893	462	297	462	304	7
4	1	300	8	2.48299	662	124	682	127	20.2237
4	1	100	8	1.43382	529	482	543	459	26.9258
4	1	300	1	1.48148	807	332	815	337	9.43398
4	1	100	8	1.49088	425	334	423	333	2.23607
4	1	100	2	1.93914	610	401	619	413	15
4	1	100	4	0.880143	414	401	413	395	6.08276
4	1	300	8	1.89425	564	679	588	724	51
4	1	300	4	1.81054	742	191	745	182	9.48683
4	1	100	2	1.95234	546	478	520	488	27.8568
4	1	200	4	1.60376	641	537	650	576	40.025
4	1	300	1	2.93498	460	89	448	86	12.3693
4	1	200	0.5	1.39293	315	419	290	488	73.3894
4	2	200	1	1.23817	315	419	320	430	12.083
4	2	300	2	1.71006	362	124	348	136	18.4391
4	2	100	0.5	2.22537	599	434	584	412	26.6271
4	2	100	2	2.31572	599	434	624	454	32.0156
4	2	300	8	1.94606	319	154	283	132	42.19
4	2	200	2	1.52809	339	484	359	489	20.6155
4	2	200	8	1.17749	444	196	443	211	15.0333
4	2	100	4	1.57968	610	401	651	424	47.0106
4	2	300	2	1.43713	564	89	565	71	18.0278
4	2	200	0.5	2.76666	444	572	415	624	59.5399
4	2	300	8	1.04507	564	679	533	726	56.3028
4	2	100	2	1.24578	562	471	556	457	15.2315
4	2	300	0.5	1.78789	319	614	309	639	26.9258
4	2	100	1	1.09914	599	334	583	345	19.4165
4	2	200	8	2.11052	547	187	534	220	35.4683
4	2	100	4	1.24626	418	418	436	434	24.0832
4	2	200	4	0.882244	324	316	371	321	47.2652
4	2	200	8	1.47708	412	557	436	611	59.0931
4	2	200	4	2.52032	477	581	495	575	18.9737
4	2	300	0.5	2.15883	460	89	443	55	38.0132
4	2	300	2	1.56171	460	679	421	729	63.4114
4	2	300	8	1.8182	742	191	758	202	19.4165
4	2	100	1	3.38523	562	297	568	285	13.4164
4	2	200	1	1.72553	685	284	691	281	6.7082
4	2	300	4	2.13064	807	436	796	456	22.8254
4	2	100	1	0.92271	462	471	458	470	4.12311
4	2	100	0.5	1.96373	589	320	589	308	12
4	2	200	4	1.98415	700	452	659	419	52.6308
4	2	300	0.5	2.16616	252	534	261	537	9.48683
4	2	100	1	1.62756	425	434	429	447	13.6015
4	3	200	8	1.72492	612	557	595	508	51.8652
4	3	100	8	3.24869	589	448	588	446	2.23607
4	3	200	0.5	1.97346	641	231	642	256	25.02
4	3	200	0.5	2.08582	444	196	449	224	28.4429
4	3	100	4	2.12655	495	482	479	466	22.6274
4	3	200	2	3.77954	315	419	278	422	37.1214
4	3	200	4	1.63779	477	187	455	208	30.4138
4	3	300	1	1.3178	742	191	753	214	25.4951
4	3	300	4	3.21961	772	534	776	513	21.3776
4	3	300	1	2.06585	252	534	243	533	9.05539
4	3	200	1	1.5713	412	557	402	546	14.8661
4	3	300	2	1.8256	362	644	345	651	18.3848
4	3	100	2	1.25976	448	307	466	332	30.8058
4	3	300	1	1.75706	705	614	742	623	38.0789
4	3	300	8	2.2307	705	154	659	183	54.3783
4	3	200	4	1.65826	339	284	342	264	20.2237
4	3	100	1	2.01848	418	418	426	424	10
4	3	200	2	2.69755	383	537	369	545	16.1245
4	3	100	8	1.48595	606	418	594	422	12.6491
4	3	300	0.5	2.13644	460	89	454	102	14.3178
4	3	100	0.5	1.07523	425	334	445	325	21.9317
4	3	100	0.5	1.48161	529	286	537	277	12.0416
4	3	200	0.5	1.41298	315	419	315	413	6
4	3	300	2	1.43665	705	154	711	169	16.1555
4	3	100	1	1.28352	495	482	509	464	22.8035
4	3	200	8	2.07696	383	231	400	253	27.8029
4	3	100	8	1.80105	529	286	526	293	7.61577
4	3	300	2	1.46757	794	281	839	279	45.0444
4	3	100	4	1.58788	546	290	550	310	20.3961
4	3	300	4	2.74523	662	124	678	140	22.6274
4	4	100	2	1.29421	610	367	512	384	99.4636
4	4	300	2	1.19278	772	234	798	230	26.3059
4	4	300	4	1.67243	409	666	421	649	20.8087
4	4	100	2	1.89114	478	478	496	450	33.2866
4	4	200	1	1.80454	315	349	314	329	20.025
4	4	300	1	1.5606	772	234	775	233	3.16228
4	4	300	2	1.8504	772	534	779	539	8.60233
4	4	100	8	1.34892	478	290	480	281	9.21954
4	4	300	0.5	1.71082	807	332	817	332	10
4	4	100	1	1.27104	448	307	458	304	10.4403
4	4	100	4	1.34734	606	350	616	329	23.2594
4	4	200	8	1.92091	580	572	617	610	53.0377
4	4	100	4	3.86063	576	307	585	306	9.05539
4	4	300	8	2.85485	217	332	176	330	41.0488
4	4	100	4	2.63267	610	367	605	357	11.1803
4	4	300	1	1.51628	282	577	272	594	19.7231
4	4	200	1	1.57952	547	581	550	588	7.61577
4	4	200	4	1.66169	339	484	331	511	28.1603
4	4	100	2	1.67553	418	418	414	440	22.3607
4	4	100	2	1.75273	589	320	600	306	17.8045
4	4	300	8	2.10624	409	102	395	131	32.2025
4	4	300	4	1.81933	564	679	566	705	26.0768
4	4	100	0.5	2.00537	425	434	430	437	5.83095
4	4	200	0.5	1.25748	315	419	310	416	5.83095
4	4	200	0.5	1.4048	641	231	646	246	15.8114
4	4	200	0.5	1.51337	612	211	607	219	9.43398
4	4	200	8	1.44062	444	572	398	595	51.4296
4	4	200	1	1.17688	383	231	381	254	23.0868
4	4	200	0.5	1.72649	324	316	345	324	22.4722
4	4	300	8	1.49812	807	436	817	457	23.2594
4	5	100	8	1.76484	435	448	445	451	10.4403
4	5	100	4	1.68194	606	350	603	354	5
4	5	300	4	2.29113	362	124	326	133	37.108
4	5	200	0.5	1.4697	641	537	639	577	40.05
4	5	300	4	1.5616	662	644	702	691	61.7171
4	5	200	0.5	1.50211	477	187	490	243	57.4891
4	5	300	1	2.73848	705	614	708	679	65.0692
4	5	100	8	1.72388	562	297	571	305	12.0416
4	5	200	8	1.53065	580	572	582	589	17.1172
4	5	200	0.5	1.49281	612	211	605	235	25
4	5	100	1	1.74535	414	367	410	372	6.40312
4	5	100	0.5	2.98484	414	367	414	370	3
4	5	100	2	1.74705	610	367	617	361	9.21954
4	5	300	1	1.80177	772	534	769	522	12.3693
4	5	300	8	2.32334	564	679	581	685	18.0278
4	5	200	4	1.33667	580	196	575	214	18.6815
4	5	200	1	1.55663	383	537	408	556	31.4006
4	5	100	1	1.71765	610	401	599	398	11.4018
4	5	100	4	1.47535	448	461	442	452	10.8167
4	5	300	2	2.49636	460	679	452	689	12.8062
4	5	200	1	1.57883	665	513	636	493	35.2278
4	5	100	2	1.20529	546	290	547	300	10.0499
4	5	100	4	1.56097	495	286	487	289	8.544
4	5	200	2	0.986778	315	349	335	342	21.1896
4	5	300	2	1.30613	772	534	799	548	30.4138
4	5	200	8	1.411	700	316	723	333	28.6007
4	5	200	8	1.92087	700	316	717	307	19.2354
4	5	300	0.5	1.69021	662	644	684	638	22.8035
4	5	300	2	1.49763	230	281	235	270	12.083
4	5	300	0.5	1.31279	460	679	408	697	55.0273
4	6	100	8	2.57351	418	418	421	419	3.16228
4	6	300	2	1.66868	252	534	236	563	33.121
4	6	300	4	2.12983	362	644	337	664	32.0156
4	6	100	2	1.3232	599	334	604	344	11.1803
4	6	100	8	1.2558	562	297	575	304	14.7648
4	6	200	2	2.23492	547	581	566	595	23.6008
4	6	300	1	1.93967	282	191	286	204	13.6015
4	6	200	2	2.22528	383	231	405	268	43.0465
4	6	300	1	1.24434	362	124	309	118	53.3385
4	6	100	0.5	1.42123	589	320	564	340	32.0156
4	6	300	8	2.46049	217	436	226	473	38.0789
4	6	100	4	1.62823	562	471	550	444	29.5466
4	6	300	8	1.94481	217	332	179	329	38.1182
4	6	300	0.5	2.36752	807	332	826	308	30.6105
4	6	300	0.5	1.48798	772	534	757	539	15.8114
4	6	200	1	1.36803	547	187	544	206	19.2354
4	6	300	0.5	2.00039	252	234	254	244	10.198
4	6	100	8	1.76331	610	401	622	403	12.1655
4	6	200	2	1.2028	339	484	326	521	39.2173
4	6	200	1	3.46888	477	581	473	604	23.3452
4	6	200	2	1.76111	359	513	368	493	21.9317
4	6	100	4	2.85962	418	350	409	335	17.4929
4	6	100	4	2.70639	478	290	483	296	7.81025
4	6	100	0.5	1.96576	529	482	549	492	22.3607
4	6	200	4	1.64372	477	581	470	570	13.0384
4	6	100	8	1.78134	448	461	442	457	7.2111
4	6	200	0.5	1.65721	685	484	673	490	13.4164
4	6	200	4	2.22497	412	211	385	219	28.1603
4	6	200	1	1.90055	383	231	371	220	16.2788
4	6	300	1	1.3763	662	644	684	681	43.0465
5	1	300	4	2.48914	252	234	326	283	88.7525
5	1	200	0.5	0.875265	685	284	684	293	9.05539
5	1	100	1	2.28648	478	478	465	477	13.0384
5	1	200	1	1.34552	700	316	689	335	21.9545
5	1	300	2	1.36584	362	124	366	157	33.2415
5	1	300	0.5	1.32668	772	234	768	258	24.3311
5	1	100	4	0.834376	414	401	421	417	17.4642
5	1	200	4	1.49866	665	513	679	551	40.4969
5	1	300	4	1.72104	319	154	318	136	18.0278
5	1	100	0.5	1.27802	589	448	597	464	17.8885
5	1	300	4	2.01836	615	102	643	107	28.4429
5	1	300	8	1.37032	742	191	780	168	44.4185
5	1	100	2	0.993301	478	290	467	304	17.8045
5	1	300	0.5	1.94671	615	102	614	94	8.06226
5	1	200	8	1.68745	412	557	391	560	21.2132
5	1	200	1	1.37665	383	537	363	554	26.2488
5	1	100	8	0.968748	448	307	444	324	17.4642
5	1	200	4	1.42359	547	187	561	199	18.4391
5	1	200	0.5	1.333	685	484	688	519	35.1283
5	1	100	1	2.04664	462	297	456	306	10.8167
5	1	100	8	1.98812	546	478	553	520	42.5793
5	1	200	1	2.39247	580	196	609	206	30.6757
5	1	100	2	1.79218	435	448	446	453	12.083
5	1	300	0.5	1.04783	460	89	458	135	46.0435
5	1	200	2	1.66163	547	187	549	168	19.105
5	1	300	2	1.95835	282	577	276	635	58.3095
5	1	300	1	1.20752	217	332	235	342	20.5913
5	1	200	2	1.47343	339	284	337	303	19.105
5	1	100	8	1.77314	606	418	607	445	27.0185
5	1	100	8	1.14788	562	297	613	319	55.5428
5	2	300	0.5	1.37007	807	332	813	346	15.2315
5	2	100	1	1.28836	478	478	464	474	14.5602
5	2	200	4	1.24103	700	316	730	331	33.541
5	2	200	2	0.769659	700	316	728	318	28.0713
5	2	200	1	1.16876	477	187	487	217	31.6228
5	2	200	1	1.15069	685	484	702	510	31.0644
5	2	300	2	1.69913	230	281	311	309	85.703
5	2	100	8	1.48951	462	297	451	309	16.2788
5	2	200	1	1.51278	359	255	341	272	24.7588
5	2	100	1	1.2663	599	334	618	341	20.2485
5	2	300	8	1.53846	794	281	857	291	63.7887
5	2	200	2	1.24295	700	452	655	510	73.4098
5	2	100	4	1.65859	562	297	574	310	17.6918
5	2	100	8	1.19526	495	482	469	489	26.9258
5	2	300	8	1.25011	460	89	484	63	35.3836
5	2	100	2	1.49295	478	478	492	491	19.105
5	2	100	8	1.54649	589	320	634	342	50.0899
5	2	300	0.5	1.03523	252	234	270	244	20.5913
5	2	300	4	1.74497	742	577	741	629	52.0096
5	2	300	4	1.67246	319	154	325	168	15.2315
5	2	100	4	1.54053	495	482	482	472	16.4012
5	2	300	2	1.94627	662	124	691	123	29.0172
5	2	200	8	1.30402	665	513	706	564	65.437
5	2	200	0.5	1.33173	580	572	556	552	31.241
5	2	100	0.5	0.773439	610	367	594	370	16.2788
5	2	200	4	0.981015	547	581	551	650	69.1158
5	2	300	0.5	1.31957	362	124	376	162	40.4969
5	2	200	1	4.58209	580	196	626	195	46.0109
5	2	100	0.5	0.994081	435	320	444	329	12.7279
5	2	300	2	1.46404	319	614	296	635	31.1448
5	3	100	8	0.087671	589	320	513	384	99.3579
5	3	100	8	1.59113	418	350	421	368	18.2483
5	3	200	0.5	1.24863	700	452	714	496	46.1736
5	3	200	2	0.187141	477	187	508	391	206.342
5	3	300	1	1.63425	662	124	717	115	55.7315
5	3	100	4	1.09749	529	482	535	518	36.4966
5	3	200	2	1.55029	612	211	647	226	38.0789
5	3	300	1	1.02139	217	436	245	469	43.2782
5	3	200	0.5	1.47868	359	255	334	275	32.0156
5	3	300	8	1.25762	460	679	408	670	52.7731
5	3	100	4	0.937549	462	471	460	492	21.095
5	3	100	2	0.916644	435	320	440	333	13.9284
5	3	100	1	0.92213	576	307	576	317	10
5	3	300	8	2.04677	362	124	288	111	75.1332
5	3	200	8	1.81737	700	316	724	330	27.7849
5	3	300	0.5	1.62691	807	436	799	478	42.7551
5	3	300	2	1.73566	409	666	408	692	26.0192
5	3	100	1	1.09618	414	401	416	445	44.0454
5	3	100	4	1.4684	599	434	566	427	33.7343
5	3	100	8	0.981206	448	307	417	334	41.1096
5	3	200	4	1.07176	324	452	341	524	73.9797
5	3	300	4	0.780039	460	89	483	84	23.5372
5	3	200	4	1.36635	359	513	346	525	17.6918
5	3	200	0.5	0.813568	612	557	618	571	15.2315
5	3	100	1	0.558412	606	350	610	359	9.84886
5	3	200	0.5	0.945154	477	581	463	587	15.2315
5	3	300	2	1.24786	615	102	658	174	83.863
5	3	300	1	1.57876	564	89	576	99	15.6205
5	3	300	2	2.26239	217	436	601	244	429.325
5	3	200	0.5	1.9927	315	419	300	456	39.9249
5	4	200	1	1.41034	444	196	447	223	27.1662
5	4	200	2	0.841127	383	231	377	246	16.1555
5	4	300	8	0.944538	705	614	762	677	84.9588
5	4	100	0.5	0.967624	610	401	625	403	15.1327
5	4	300	4	1.66884	409	666	378	706	50.6063
5	4	100	1	0.754825	418	418	421	432	14.3178
5	4	100	1	1.30011	610	401	634	440	45.793
5	4	200	2	1.01844	412	557	409	526	31.1448
5	4	300	0.5	0.889368	282	577	257	595	30.8058
5	4	200	4	0.961906	359	255	357	281	26.0768
5	4	300	4	1.51594	409	666	424	641	29.1548
5	4	300	0.5	1.18098	662	124	706	211	97.4936
5	4	100	8	0.935092	606	350	625	368	26.1725
5	4	300	2	1.48731	362	644	387	597	53.2353
5	4	300	8	0.968863	230	281	395	345	176.977
5	4	200	1	1.02984	444	196	411	313	121.565
5	4	200	8	1.11305	477	581	441	620	53.0754
5	4	100	4	1.04245	589	320	608	340	27.5862
5	4	100	1	0.817853	599	434	590	452	20.1246
5	4	300	2	1.05955	615	666	601	718	53.8516
5	4	100	8	0.777009	435	448	429	472	24.7386
5	4	300	2	1.45941	794	281	842	264	50.9215
5	4	100	8	1.10019	478	290	465	323	35.4683
5	4	300	0.5	1.02698	319	614	336	602	20.8087
5	4	200	1	0.893807	612	557	602	595	39.2938
5	4	200	0.5	0.860557	315	349	372	375	62.6498
5	4	200	4	1.00581	359	513	360	574	61.0082
5	4	100	4	0.728615	562	471	583	490	28.3196
5	4	100	2	0.938278	606	418	623	453	38.9102
5	4	200	0.5	0.741464	383	231	403	257	32.8024
5	5	300	1	1.00017	742	577	785	610	54.2033
5	5	300	2	1.43405	252	534	255	556	22.2036
5	5	100	4	1.28293	562	471	581	499	33.8378
5	5	200	1	1.5703	665	513	647	537	30
5	5	100	8	0.783903	462	471	421	511	57.28
5	5	100	1	1.21847	529	286	540	292	12.53
5	5	200	8	1.88983	709	349	715	332	18.0278
5	5	300	1	1.6821	662	644	656	666	22.8035
5	5	300	0.5	1.31065	772	534	748	580	51.8845
5	5	100	8	1.22152	478	290	459	314	30.6105
5	5	200	4	0.958379	315	349	359	374	50.6063
5	5	200	4	1.08759	547	187	576	217	41.7253
5	5	100	4	0.671737	414	401	436	411	24.1661
5	5	100	2	0.995643	529	482	485	452	53.2541
5	5	100	0.5	1.32497	414	367	417	365	3.60555
5	5	300	4	1.78732	742	577	772	672	99.6243
5	5	100	8	1.04873	546	290	567	292	21.095
5	5	200	0.5	1.57492	359	255	315	270	46.4866
5	5	200	2	1.38558	665	255	690	264	26.5707
5	5	100	2	1.34716	606	350	613	351	7.07107
5	5	200	0.5	1.75487	339	284	546	365	222.284
5	5	100	0.5	0.752224	478	478	456	491	25.5539
5	5	200	2	1.21761	324	452	293	480	41.7732
5	5	300	4	1.20922	772	534	815	578	61.5224
5	5	200	0.5	1.42891	612	557	614	574	17.1172
5	5	300	1	2.28906	252	534	270	572	42.0476
5	5	300	8	1.38543	319	614	341	658	49.1935
5	5	200	2	1.40315	324	316	342	321	18.6815
5	5	300	8	0.015651	807	436	512	384	299.548
5	5	300	1	1.80542	282	191	309	202	29.1548
5	6	300	0.5	1.0147	705	614	708	613	3.16228
5	6	300	2	1.1739	662	124	702	117	40.6079
5	6	200	4	0.891572	709	349	714	338	12.083
5	6	200	1	1.16485	477	187	465	197	15.6205
5	6	300	4	1.21916	362	644	312	732	101.213
5	6	200	8	1.03406	685	284	694	281	9.48683
5	6	300	8	1.16826	705	614	678	646	41.8688
5	6	200	2	0.774659	444	572	408	577	36.3456
5	6	200	1	1.14532	324	452	345	480	35
5	6	200	2	0.975025	665	255	689	265	26
5	6	100	8	0.945932	462	471	432	506	46.0977
5	6	100	8	0.632502	599	334	597	363	29.0689
5	6	300	2	1.2029	409	666	389	728	65.146
5	6	200	2	1.02135	315	349	359	360	45.3542
5	6	100	8	1.10038	478	290	603	359	142.78
5	6	300	0.5	2.63626	705	154	446	311	302.87
5	6	100	0.5	3.06199	418	418	417	439	21.0238
5	6	100	2	1.56592	589	320	614	319	25.02
5	6	300	4	1.89244	662	644	607	352	297.135
5	6	300	1	1.12078	409	666	382	685	33.0151
5	6	200	0.5	0.873206	412	557	396	553	16.4924
5	6	100	4	0.867906	462	297	468	319	22.8035
5	6	100	0.5	0.831123	418	350	415	350	3
5	6	100	1	0.754723	418	350	512	384	99.96
5	6	100	8	1.05989	576	461	583	494	33.7343
5	6	300	1	1.34974	319	614	281	634	42.9418
5	6	300	0.5	1.02044	230	487	258	542	61.7171
5	6	200	4	0.771137	477	187	471	202	16.1555
5	6	200	4	1.20136	324	452	334	484	33.5261
5	6	100	1	0.979482	418	418	403	451	36.2491
6	1	200	0.5	1.32234	530	255	546	288	36.6742
6	1	300	0.5	2.30608	833	124	851	145	27.6586
6	1	100	1	1.77389	770	334	756	351	22.0227
6	1	100	4	1.96985	633	297	639	295	6.32456
6	1	300	4	1.98042	735	89	784	78	50.2195
6	1	100	1	1.92792	781	401	762	426	31.4006
6	1	200	2	2.59273	583	211	594	252	42.45
6	1	300	0.5	2.2617	913	577	907	642	65.2763
6	1	300	8	1.94848	388	436	394	510	74.2428
6	1	300	0.5	2.58254	833	644	832	681	37.0135
6	1	200	4	1.60605	812	537	793	525	22.4722
6	1	200	2	2.34112	554	231	526	250	33.8378
6	1	300	8	2.15187	876	154	929	182	59.9416
6	1	100	4	1.93104	700	482	707	493	13.0384
6	1	300	2	2.47406	490	154	465	147	25.9615
6	1	100	1	1.77427	619	461	625	470	10.8167
6	1	300	0.5	2.43395	833	644	835	624	20.0998
6	1	100	2	3.04191	666	286	649	284	17.1172
6	1	200	1	2.74831	751	572	778	574	27.074
6	1	200	4	1.98	718	581	738	604	30.4795
6	1	200	0.5	2.10847	856	484	819	500	40.3113
6	1	100	4	2.54603	781	401	769	419	21.6333
6	1	200	8	1.51587	871	316	863	318	8.24621
6	1	100	8	1.58088	606	448	601	466	18.6815
6	1	200	2	3.02087	871	452	884	479	29.9666
6	1	100	2	2.12216	666	482	671	488	7.81025
6	1	200	1	2.68636	486	419	485	446	27.0185
6	1	300	8	2.59619	943	534	954	586	53.1507
6	1	300	8	2.77182	735	679	743	710	32.0156
6	1	100	1	1.79431	700	482	705	490	9.43398
6	2	300	1	2.04394	786	102	815	162	66.6408
6	2	200	8	2.17221	495	316	507	350	36.0555
6	2	300	0.5	2.45424	786	102	842	111	56.7186
6	2	100	8	1.89252	777	418	772	441	23.5372
6	2	100	2	10.8533	589	418	416	698	329.134
6	2	100	2	1.79034	596	434	616	434	20
6	2	100	0.5	1.9301	760	320	781	320	21
6	2	200	0.5	3.13191	812	537	815	552	15.2971
6	2	200	0.5	2.32054	751	572	767	564	17.8885
6	2	300	0.5	2.48378	786	102	805	140	42.4853
6	2	100	8	1.40769	770	334	786	347	20.6155
6	2	300	4	1.93363	913	191	970	188	57.0789
6	2	100	8	1.66636	619	307	604	316	17.4929
6	2	300	1	2.2284	833	644	906	630	74.3303
6	2	100	4	2.09181	633	297	642	321	25.632
6	2	300	2	1.78694	490	614	483	627	14.7648
6	2	200	2	2.77761	812	537	806	531	8.48528
6	2	300	8	1.86563	943	234	958	252	23.4307
6	2	300	2	2.11659	453	191	451	192	2.23607
6	2	200	2	2.316	648	581	656	590	12.0416
6	2	300	4	2.09459	735	89	735	114	25
6	2	200	1	2.77164	871	452	876	473	21.587
6	2	100	8	1.78764	596	434	594	441	7.28011
6	2	300	0.5	3.37417	913	191	860	215	58.1808
6	2	100	1	1.60223	717	290	730	302	17.6918
6	2	200	4	2.12568	615	572	584	598	40.4599
6	2	200	1	2.94598	871	316	863	326	12.8062
6	2	200	4	1.7304	486	419	496	438	21.4709
6	2	200	4	1.82379	486	349	521	350	35.0143
6	2	100	1	2.66579	585	401	589	423	22.3607
6	3	100	4	1.69233	606	448	595	462	17.8045
6	3	200	4	1.77978	648	581	641	575	9.21954
6	3	300	1	2.95022	913	191	894	217	32.2025
6	3	200	1	1.81432	856	484	814	501	45.31
6	3	100	8	2.79374	649	290	647	312	22.0907
6	3	300	4	1.63802	388	332	361	347	30.8869
6	3	200	2	2.01167	718	581	756	548	50.3289
6	3	300	0.5	2.4117	453	577	425	610	43.2782
6	3	100	2	1.25234	633	297	634	326	29.0172
6	3	300	0.5	1.8803	423	534	382	592	71.0282
6	3	100	8	2.12844	717	290	718	311	21.0238
6	3	100	2	1.81528	606	320	591	325	15.8114
6	3	100	1	2.17009	717	478	727	479	10.0499
6	3	100	1	2.41201	770	434	762	445	13.6015
6	3	200	8	2.34811	836	255	837	280	25.02
6	3	300	2	2.4318	423	534	379	619	95.7131
6	3	200	4	2.13409	871	316	866	308	9.43398
6	3	200	2	1.74102	583	557	603	544	23.8537
6	3	300	2	1.66009	401	281	443	287	42.4264
6	3	100	0.5	3.69221	633	297	631	315	18.1108
6	3	300	8	2.65002	533	644	511	695	55.5428
6	3	300	1	2.67794	833	644	859	660	30.5287
6	3	200	4	1.65051	718	187	725	236	49.4975
6	3	300	0.5	3.00137	453	577	445	615	38.833
6	3	200	8	2.05444	836	513	846	561	49.0306
6	3	100	4	1.88623	666	482	665	496	14.0357
6	3	300	1	3.05422	965	281	934	305	39.2046
6	3	200	8	2.16816	615	572	588	595	35.4683
6	3	100	0.5	2.13825	781	367	790	374	11.4018
6	3	200	0.5	2.85184	880	349	912	350	32.0156
6	4	200	8	1.80605	648	187	613	229	54.6717
6	4	300	2	2.04257	580	666	536	698	54.4059
6	4	200	2	2.35607	530	255	553	285	37.8021
6	4	200	8	3.3191	783	557	815	566	33.2415
6	4	100	1	1.75648	781	367	775	381	15.2315
6	4	300	2	2.46171	876	154	863	209	56.5155
6	4	200	4	1.66452	486	349	532	361	47.5395
6	4	300	8	2.49189	631	679	612	684	19.6469
6	4	300	8	2.08059	631	89	625	109	20.8806
6	4	100	1	1.06254	633	297	634	318	21.0238
6	4	300	0.5	3.21895	786	102	801	128	30.0167
6	4	200	1	1.88579	836	513	783	505	53.6004
6	4	200	0.5	3.53779	583	211	594	235	26.4008
6	4	100	2	1.72849	733	297	730	316	19.2354
6	4	300	4	2.00574	580	666	560	703	42.0595
6	4	200	4	1.73585	615	572	633	535	41.1461
6	4	100	0.5	1.79584	747	461	760	471	16.4012
6	4	100	4	1.85609	760	448	774	466	22.8035
6	4	100	4	2.19909	619	307	599	311	20.3961
6	4	100	4	1.94413	619	461	630	461	11
6	4	100	1	1.75599	733	297	747	315	22.8035
6	4	200	2	2.55619	495	452	520	451	25.02
6	4	200	1	3.17361	554	537	579	542	25.4951
6	4	300	1	2.30592	423	534	431	559	26.2488
6	4	200	8	2.28011	751	572	728	562	25.0799
6	4	300	2	2.45503	735	89	743	107	19.6977
6	4	300	0.5	3.09825	401	487	418	480	18.3848
6	4	300	8	2.03656	943	534	907	554	41.1825
6	4	100	0.5	1.41174	589	418	585	432	14.5602
6	4	100	0.5	1.89313	700	482	708	487	9.43398
6	5	100	8	3.00494	589	418	608	442	30.6105
6	5	100	4	1.69563	649	478	664	484	16.1555
6	5	100	1	1.91194	619	461	607	465	12.6491
6	5	200	8	1.82374	530	513	524	539	26.6833
6	5	200	8	2.21024	836	255	820	267	20
6	5	300	0.5	2.40897	631	89	595	101	37.9473
6	5	100	2	1.43544	700	286	709	309	24.6982
6	5	300	1	2.52693	943	534	921	566	38.833
6	5	200	2	1.94015	751	572	763	563	15
6	5	300	0.5	3.95198	490	154	481	193	40.025
6	5	200	1	2.27407	718	581	709	571	13.4536
6	5	100	1	2.18234	589	418	619	431	32.6956
6	5	200	8	1.96895	648	581	638	586	11.1803
6	5	200	4	2.62867	530	513	532	530	17.1172
6	5	300	4	3.8026	833	124	888	125	55.0091
6	5	100	0.5	2.75192	619	307	633	333	29.5296
6	5	100	4	2.23189	747	307	738	328	22.8473
6	5	300	4	1.8302	735	679	734	688	9.05539
6	5	100	0.5	1.81451	585	401	607	428	34.8281
6	5	200	1	1.68156	495	452	506	467	18.6011
6	5	300	0.5	2.17563	978	436	962	462	30.5287
6	5	300	2	2.40391	913	577	900	587	16.4012
6	5	200	8	1.65238	880	419	831	447	56.4358
6	5	300	2	2.4644	631	679	613	706	32.45
6	5	200	8	1.67197	510	484	516	513	29.6142
6	5	300	4	1.90432	913	191	873	243	65.6049
6	5	300	0.5	2.6616	533	124	539	164	40.4475
6	5	200	2	2.20254	751	572	764	567	13.9284
6	5	100	1	1.51616	700	482	711	493	15.5563
6	5	100	2	1.97399	619	307	582	308	37.0135
6	6	200	4	1.81061	783	557	776	548	11.4018
6	6	200	0.5	2.19583	648	581	630	598	24.7588
6	6	100	1	2.24434	619	307	609	314	12.2066
6	6	100	4	3.338	760	320	751	327	11.4018
6	6	300	4	2.26431	876	614	871	617	5.83095
6	6	200	2	1.56782	554	231	580	287	61.7414
6	6	300	8	2.6556	533	644	553	690	50.1597
6	6	100	1	3.05054	700	286	712	304	21.6333
6	6	100	2	1.96829	666	482	666	492	10
6	6	100	0.5	2.24846	777	418	780	436	18.2483
6	6	300	2	2.09798	978	436	934	473	57.4891
6	6	300	0.5	2.97509	735	679	758	691	25.9422
6	6	300	1	2.33127	388	332	430	342	43.1741
6	6	100	8	4.20023	585	367	574	349	21.095
6	6	200	4	1.62034	554	231	548	283	52.345
6	6	100	8	2.38581	733	297	744	304	13.0384
6	6	200	1	2.62585	486	419	498	449	32.311
6	6	300	8	2.04161	833	644	831	629	15.1327
6	6	100	2	2.86795	760	320	738	332	25.0599
6	6	200	1	2.55887	751	196	753	228	32.0624
6	6	200	4	2.20775	718	187	723	230	43.2897
6	6	300	4	1.55996	388	332	454	357	70.5762
6	6	200	0.5	1.92421	856	484	839	496	20.8087
6	6	100	0.5	1.98367	770	434	760	441	12.2066
6	6	300	8	2.2285	978	332	916	368	71.6938
6	6	300	8	2.26782	490	614	492	660	46.0435
6	6	300	0.5	2.85619	833	124	819	140	21.2603
6	6	100	2	1.42209	619	461	635	454	17.4642
6	6	200	1	3.91391	751	196	753	199	3.60555
6	6	200	2	2.35077	836	255	848	287	34.176
7	1	300	8	1.69863	388	332	370	333	18.0278
7	1	100	8	1.51577	770	334	751	348	23.6008
7	1	100	1	2.92336	770	334	777	338	8.06226
7	1	300	2	3.58919	913	191	933	209	26.9072
7	1	100	0.5	3.89368	777	350	778	337	13.0384
7	1	100	1	1.22591	747	461	712	438	41.8808
7	1	200	8	2.68794	751	196	736	306	111.018
7	1	100	2	2.01365	747	461	755	441	21.5407
7	1	200	2	4.28867	615	572	606	532	41
7	1	300	0.5	2.29599	876	154	861	175	25.807
7	1	300	1	3.53975	423	234	409	235	14.0357
7	1	200	0.5	2.95817	583	211	569	251	42.3792
7	1	300	1	3.40547	833	124	831	129	5.38516
7	1	200	8	5.69642	880	349	854	344	26.4764
7	1	200	4	3.44176	812	537	866	576	66.6108
7	1	200	4	2.89733	510	284	502	286	8.24621
7	1	200	8	3.51621	812	537	839	532	27.4591
7	1	200	1	2.26613	880	349	883	334	15.2971
7	1	300	0.5	2.99661	913	577	966	604	59.4811
7	1	300	4	3.03469	735	89	804	128	79.2591
7	1	100	0.5	2.09806	747	307	752	312	7.07107
7	1	300	1	4.41717	580	102	586	139	37.4833
7	1	100	4	3.61944	589	350	573	325	29.6816
7	1	200	2	2.5663	583	557	565	586	34.1321
7	1	100	8	1.8324	760	448	745	452	15.5242
7	1	100	4	2.80915	585	367	578	379	13.8924
7	1	300	2	2.39225	965	281	1001	252	46.2277
7	1	200	2	1.04355	718	581	714	525	56.1427
7	1	100	0.5	4.14377	700	286	702	297	11.1803
7	1	300	4	3.3113	401	487	453	506	55.3624
7	2	200	0.5	2.74731	530	255	525	270	15.8114
7	2	300	2	3.20542	876	614	899	631	28.6007
7	2	300	2	3.29827	876	154	880	152	4.47214
7	2	200	0.5	2.83226	856	484	880	509	34.6554
7	2	100	2	2.41398	781	401	811	402	30.0167
7	2	200	1	1.51641	495	452	521	452	26
7	2	200	4	2.41377	583	557	544	502	67.424
7	2	200	0.5	2.87334	856	484	888	511	41.8688
7	2	100	1	1.18011	760	320	759	304	16.0312
7	2	300	4	2.64383	533	124	541	129	9.43398
7	2	300	4	2.67187	388	436	388	450	14
7	2	100	2	1.84613	770	334	769	338	4.12311
7	2	100	8	2.23095	596	434	549	442	47.676
7	2	300	0.5	3.33492	978	436	969	440	9.84886
7	2	300	4	3.62596	580	102	545	123	40.8167
7	2	200	0.5	5.32968	880	349	916	392	56.0803
7	2	200	8	3.19778	812	537	848	538	36.0139
7	2	100	1	2.36029	733	471	752	510	43.382
7	2	300	4	2.28228	943	234	913	274	50
7	2	100	8	3.51338	760	320	807	319	47.0106
7	2	300	1	6.13434	913	191	909	224	33.2415
7	2	300	1	3.99555	913	191	965	168	56.8595
7	2	100	8	1.78868	781	367	794	361	14.3178
7	2	100	1	3.85537	633	297	610	296	23.0217
7	2	200	4	2.78179	751	572	735	514	60.1664
7	2	200	2	2.7338	486	419	435	434	53.1601
7	2	300	0.5	2.71704	388	436	373	431	15.8114
7	2	100	8	1.31813	781	401	797	426	29.6816
7	2	200	2	2.41808	783	211	809	233	34.0588
7	2	100	8	1.56208	666	482	607	484	59.0339
7	3	300	2	2.00377	876	154	935	140	60.6383
7	3	200	8	2.40722	615	196	629	127	70.406
7	3	300	1	3.19839	965	487	975	523	37.3631
7	3	300	4	2.63433	913	577	947	613	49.5177
7	3	200	1	3.42201	510	484	511	494	10.0499
7	3	300	0.5	3.94286	978	436	996	404	36.7151
7	3	300	1	3.72799	631	679	600	685	31.5753
7	3	200	8	3.34858	751	572	716	645	80.9568
7	3	100	4	1.50457	606	448	586	459	22.8254
7	3	300	8	2.59441	401	487	463	434	81.5659
7	3	300	2	2.74058	965	281	1019	242	66.6108
7	3	200	2	2.33486	836	513	858	503	24.1661
7	3	300	4	2.68884	965	281	991	288	26.9258
7	3	200	2	2.47933	583	557	561	508	53.7122
7	3	100	8	1.46809	777	418	787	446	29.7321
7	3	100	2	3.52046	596	334	589	317	18.3848
7	3	200	0.5	2.43576	836	255	813	266	25.4951
7	3	200	4	3.50608	718	581	715	596	15.2971
7	3	100	0.5	3.48418	747	307	757	308	10.0499
7	3	200	2	2.75	751	572	735	557	21.9317
7	3	300	1	1.18032	786	666	712	452	226.433
7	3	300	0.5	13.0497	423	534	790	585	370.527
7	3	100	4	1.92518	781	401	791	415	17.2047
7	3	100	8	1.74024	589	350	559	319	43.1393
7	3	200	0.5	4.7843	812	537	731	330	222.284
7	3	100	4	1.81963	666	482	653	479	13.3417
7	3	200	1	1.96558	812	537	856	562	50.6063
7	3	100	0.5	3.69582	760	448	770	466	20.5913
7	3	100	8	1.89375	633	471	602	489	35.8469
7	3	100	1	2.86897	649	478	616	492	35.8469
7	4	200	8	5.47892	554	537	664	375	195.816
7	4	200	2	1.95359	751	196	765	231	37.6962
7	4	300	2	2.52835	388	436	413	445	26.5707
7	4	300	8	3.87468	876	614	882	578	36.4966
7	4	100	2	3.12359	717	290	738	273	27.0185
7	4	300	0.5	2.49661	423	534	395	548	31.305
7	4	100	4	2.72345	733	471	732	480	9.05539
7	4	300	1	2.94846	401	281	377	236	51
7	4	100	1	2.38795	781	401	803	410	23.7697
7	4	200	2	2.15972	836	255	836	238	17
7	4	200	4	2.41761	836	513	838	508	5.38516
7	4	100	1	2.81654	589	350	550	329	44.2945
7	4	300	4	2.0308	580	102	564	145	45.8803
7	4	200	8	2.57597	836	513	852	516	16.2788
7	4	100	0.5	3.38207	770	434	770	449	15
7	4	100	0.5	1.6896	781	367	787	354	14.3178
7	4	200	8	6.41186	510	284	408	253	106.607
7	4	200	1	2.07023	751	196	751	213	17
7	4	200	1	2.05218	880	419	888	416	8.544
7	4	300	4	2.53259	388	332	377	331	11.0454
7	4	200	4	0.973805	812	537	740	509	77.2528
7	4	100	4	2.22189	700	482	725	526	50.6063
7	4	200	1	2.11178	856	284	871	287	15.2971
7	4	100	2	1.86368	770	434	755	450	21.9317
7	4	300	2	4.0981	913	577	899	620	45.2217
7	4	300	8	2.85443	580	666	517	686	66.0984
7	4	100	0.5	2.24853	585	401	567	410	20.1246
7	4	300	8	2.84087	631	89	537	51	101.39
7	4	100	0.5	2.56261	777	350	773	320	30.2655
7	4	300	0.5	2.41757	533	644	442	628	92.3959
7	5	200	4	2.24098	583	211	565	243	36.7151
7	5	300	2	2.80317	423	534	435	546	16.9706
7	5	200	0.5	2.05442	880	419	904	435	28.8444
7	5	200	8	2.11365	495	316	472	279	43.566
7	5	100	4	2.09416	700	482	669	532	58.8303
7	5	300	4	2.11402	401	281	403	268	13.1529
7	5	100	8	2.73643	700	482	733	509	42.638
7	5	100	1	2.22586	606	448	600	470	22.8035
7	5	200	1	2.11472	783	557	797	588	34.0147
7	5	300	1	12.8409	735	679	752	561	119.218
7	5	300	0.5	2.54767	423	534	411	532	12.1655
7	5	300	1	1.84447	423	234	347	206	80.9938
7	5	100	0.5	1.38719	633	471	629	457	14.5602
7	5	100	2	1.46946	747	461	747	469	8
7	5	200	0.5	2.21393	583	557	584	545	12.0416
7	5	100	0.5	1.613	633	471	632	462	9.05539
7	5	100	4	1.72012	666	482	663	473	9.48683
7	5	300	8	2.12175	833	644	790	519	132.189
7	5	200	1	2.53432	530	255	532	274	19.105
7	5	100	0.5	1.78985	606	320	606	332	12
7	5	300	2	2.50805	490	154	481	220	66.6108
7	5	100	2	2.09933	777	418	818	476	71.0282
7	5	200	4	1.87325	648	187	644	232	45.1774
7	5	200	4	2.08914	554	537	521	530	33.7343
7	5	300	8	2.97673	423	534	449	539	26.4764
7	5	100	8	2.04836	770	334	799	309	38.2884
7	5	300	8	2.5058	833	644	806	587	63.0714
7	5	200	2	1.78406	751	196	799	205	48.8365
7	5	200	2	5.37432	495	452	490	482	30.4138
7	5	300	1	2.77602	965	281	963	278	3.60555
7	6	300	8	3.37523	453	191	628	431	297.027
7	6	300	1	1.65904	490	614	498	567	47.676
7	6	200	8	2.53399	783	211	799	240	33.121
7	6	100	0.5	1.3185	717	478	721	515	37.2156
7	6	100	0.5	1.69363	596	334	568	321	30.8707
7	6	200	2	1.84857	856	284	876	270	24.4131
7	6	300	8	1.82003	965	281	944	230	55.1543
7	6	200	4	1.83808	530	255	516	275	24.4131
7	6	100	2	1.32286	649	290	501	287	148.03
7	6	300	8	2.09999	943	534	936	630	96.2549
7	6	200	4	2.07396	648	581	634	561	24.4131
7	6	100	8	2.04358	700	482	699	475	7.07107
7	6	200	1	2.49911	530	255	543	270	19.8494
7	6	200	1	2.3742	880	419	888	441	23.4094
7	6	100	2	1.32256	619	307	586	313	33.541
7	6	200	1	2.41999	615	572	553	577	62.2013
7	6	300	4	2.8347	943	234	978	228	35.5106
7	6	100	1	1.76633	760	448	755	446	5.38516
7	6	100	0.5	1.54601	760	448	781	463	25.807
7	6	300	0.5	2.63051	965	281	1010	279	45.0444
7	6	300	4	3.14024	943	234	1071	202	131.939
7	6	200	0.5	1.96027	615	572	595	596	31.241
7	6	300	8	3.03854	580	666	544	529	141.651
7	6	100	1	2.15315	747	461	770	513	56.8595
7	6	200	4	2.1809	648	187	586	244	84.22
7	6	100	2	1.74566	760	448	772	472	26.8328
7	6	300	2	1.9454	401	487	353	513	54.5894
7	6	100	4	0.998108	700	286	729	291	29.4279
7	6	300	2	1.88006	533	124	524	90	35.171
7	6	200	0.5	1.91727	510	284	528	308	30
8	1	200	4	2.50939	615	196	652	225	47.0106
8	1	200	1	1.6958	812	537	838	563	36.7696
8	1	300	1	2.51924	401	487	384	487	17
8	1	100	1	1.55453	733	297	739	298	6.08276
8	1	100	8	2.4276	596	434	583	444	16.4012
8	1	300	4	3.77812	978	436	953	403	41.4005
8	1	100	4	2.17192	606	448	625	435	23.0217
8	1	300	2	1.82434	943	534	931	543	15
8	1	100	0.5	1.56792	760	320	758	318	2.82843
8	1	200	4	2.52525	615	572	611	608	36.2215
8	1	200	8	2.76905	718	187	741	190	23.1948
8	1	300	8	5.17782	876	614	920	633	47.927
8	1	300	2	1.98199	876	154	893	170	23.3452
8	1	100	2	1.93194	619	307	614	299	9.43398
8	1	200	8	1.89054	495	316	478	320	17.4642
8	1	300	1	1.81778	786	666	826	722	68.8186
8	1	200	0.5	2.53104	880	419	915	430	36.6879
8	1	300	4	2.3802	490	154	487	135	19.2354
8	1	100	2	1.67976	606	448	598	444	8.94427
8	1	100	2	1.54636	619	307	630	305	11.1803
8	1	200	8	2.37847	495	316	541	319	46.0977
8	1	300	4	1.49252	833	124	869	134	37.3631
8	1	300	0.5	2.96219	913	191	948	177	37.6962
8	1	100	1	1.92964	717	478	744	501	35.4683
8	1	200	8	2.32127	486	419	499	445	29.0689
8	1	300	2	2.06384	423	534	384	573	55.1543
8	1	100	0.5	1.74964	596	434	602	421	14.3178
8	1	200	0.5	2.4968	783	557	789	553	7.2111
8	1	100	1	2.03682	619	307	629	292	18.0278
8	1	200	0.5	3.3962	751	572	772	566	21.8403
8	2	300	8	3.21168	943	234	905	246	39.8497
8	2	100	4	1.80571	619	461	635	474	20.6155
8	2	300	4	4.41657	913	191	926	181	16.4012
8	2	100	1	2.53969	770	434	764	430	7.2111
8	2	200	1	2.23024	486	349	503	342	18.3848
8	2	200	1	1.96718	871	316	895	319	24.1868
8	2	200	2	1.916	583	211	573	223	15.6205
8	2	100	2	2.03686	619	307	632	314	14.7648
8	2	100	0.5	2.02026	770	334	780	322	15.6205
8	2	300	2	1.91965	943	534	984	548	43.3244
8	2	100	8	1.87998	619	307	643	323	28.8444
8	2	300	1	1.76003	943	234	943	226	8
8	2	300	4	1.92355	978	332	1005	310	34.8281
8	2	200	0.5	1.69616	495	316	496	333	17.0294
8	2	200	1	1.90363	583	211	597	202	16.6433
8	2	200	1	1.88006	486	419	470	435	22.6274
8	2	300	8	2.06399	490	154	509	197	47.0106
8	2	100	0.5	2.47782	747	307	750	284	23.1948
8	2	100	2	2.12469	760	320	779	296	30.6105
8	2	100	4	2.72985	585	401	757	326	187.641
8	2	100	2	1.36448	700	286	718	262	30
8	2	300	0.5	1.34739	401	281	419	291	20.5913
8	2	300	8	1.3486	580	666	573	694	28.8617
8	2	100	4	1.17871	770	334	754	357	28.0179
8	2	300	0.5	2.13011	786	666	813	696	40.3609
8	2	200	2	0.976063	510	484	528	452	36.7151
8	2	200	8	1.62612	510	284	539	319	45.4533
8	2	200	0.5	1.65977	510	484	510	486	2
8	2	200	4	1.70773	510	484	513	485	3.16228
8	2	300	8	1.77225	833	644	858	718	78.1089
8	3	200	0.5	2.6622	530	255	559	279	37.6431
8	3	300	8	1.90673	490	154	515	165	27.313
8	3	100	2	2.85251	649	478	654	462	16.7631
8	3	200	8	3.34525	718	581	772	638	78.5175
8	3	100	0.5	2.24422	770	334	792	332	22.0907
8	3	300	2	2.95801	453	577	477	601	33.9411
8	3	300	8	2.11008	631	679	614	707	32.7567
8	3	200	0.5	2.09769	880	349	851	360	31.0161
8	3	100	1	1.48803	770	434	774	432	4.47214
8	3	300	1	3.37651	388	436	381	461	25.9615
8	3	100	1	1.45284	606	448	602	461	13.6015
8	3	100	4	1.95142	633	471	636	474	4.24264
8	3	100	8	1.71026	606	320	625	317	19.2354
8	3	300	1	2.33304	943	534	943	547	13
8	3	200	4	2.40009	486	419	495	428	12.7279
8	3	200	0.5	2.09405	648	581	681	597	36.6742
8	3	200	4	2.4281	871	452	846	465	28.178
8	3	300	4	1.7468	580	666	597	687	27.0185
8	3	200	2	1.83419	583	557	591	556	8.06226
8	3	300	4	1.70843	943	234	961	222	21.6333
8	3	200	4	2.03386	495	452	486	455	9.48683
8	3	100	2	1.59858	585	367	589	363	5.65685
8	3	100	8	1.58044	666	286	668	299	13.1529
8	3	100	0.5	2.33618	633	297	635	301	4.47214
8	3	300	1	3.43398	533	644	547	693	50.9608
8	3	200	2	1.78266	486	349	465	371	30.4138
8	3	200	0.5	1.72036	510	484	536	482	26.0768
8	3	300	8	1.57687	423	534	433	537	10.4403
8	3	300	1	1.89473	453	191	496	218	50.774
8	3	100	2	1.0884	649	290	644	270	20.6155
8	4	300	0.5	2.27443	388	332	401	335	13.3417
8	4	200	8	2.03425	510	484	511	483	1.41421
8	4	200	8	1.72424	510	284	543	306	39.6611
8	4	300	2	2.90058	423	234	409	249	20.5183
8	4	200	2	2.17778	880	419	899	447	33.8378
8	4	300	0.5	2.24814	453	191	481	205	31.305
8	4	100	1	1.62372	770	434	774	451	17.4642
8	4	300	2	2.27765	786	666	807	718	56.0803
8	4	100	0.5	1.53656	633	297	646	301	13.6015
8	4	100	4	1.35243	760	448	797	468	42.0595
8	4	300	4	1.52071	943	534	977	570	49.5177
8	4	100	4	0.976311	633	471	629	454	17.4642
8	4	300	2	1.84393	631	679	644	704	28.178
8	4	100	1	1.46062	666	482	676	521	40.2616
8	4	200	0.5	1.33397	583	557	601	566	20.1246
8	4	200	2	1.2817	856	284	823	274	34.4819
8	4	100	2	1.07845	606	320	607	318	2.23607
8	4	200	4	1.29795	751	196	759	205	12.0416
8	4	200	1	1.42075	880	419	886	439	20.8806
8	4	300	1	2.12121	580	666	609	688	36.4005
8	4	300	1	1.99877	453	191	511	198	58.4209
8	4	100	0.5	1.66389	619	307	625	294	14.3178
8	4	200	4	2.26452	836	255	828	252	8.544
8	4	200	8	2.2239	783	557	823	552	40.3113
8	4	300	4	1.57653	401	281	427	290	27.5136
8	4	300	8	1.39212	490	614	499	640	27.5136
8	4	200	0.5	1.75549	856	284	842	297	19.105
8	4	100	8	2.18647	649	478	641	480	8.24621
8	4	100	8	1.04667	770	334	788	341	19.3132
8	4	100	1	1.252	760	320	762	318	2.82843
8	5	300	8	1.62394	978	436	989	445	14.2127
8	5	200	2	2.81217	718	187	741	203	28.0179
8	5	100	8	1.34124	747	307	758	282	27.313
8	5	100	0.5	1.66586	585	367	566	369	19.105
8	5	300	2	1.19017	533	124	547	161	39.5601
8	5	200	0.5	1.57182	856	484	865	527	43.9318
8	5	100	1	1.2425	606	448	620	454	15.2315
8	5	100	4	1.0861	596	334	613	331	17.2627
8	5	100	1	1.63397	633	471	610	487	28.0179
8	5	200	4	1.79013	751	572	765	593	25.2389
8	5	200	8	1.57066	486	419	462	434	28.3019
8	5	300	2	1.7477	401	281	431	287	30.5941
8	5	300	1	1.46597	580	666	594	691	28.6531
8	5	300	8	1.82978	631	679	622	720	41.9762
8	5	200	1	2.0163	783	211	785	244	33.0606
8	5	300	0.5	2.22248	913	577	876	615	53.0377
8	5	100	1	1.20852	760	448	766	456	10
8	5	100	0.5	1.35612	747	307	755	298	12.0416
8	5	200	8	1.79661	530	255	552	252	22.2036
8	5	100	2	0.994974	619	461	631	482	24.1868
8	5	100	2	1.83795	666	482	664	529	47.0425
8	5	300	0.5	1.65441	388	332	373	333	15.0333
8	5	200	4	1.42391	871	452	916	478	51.9711
8	5	200	0.5	1.85871	648	581	659	606	27.313
8	5	300	4	1.47443	631	89	648	103	22.0227
8	5	300	4	1.69959	453	191	461	162	30.0832
8	5	300	4	1.42774	453	577	433	555	29.7321
8	5	100	1	1.18447	781	367	759	373	22.8035
8	5	200	2	1.21804	836	513	832	517	5.65685
8	5	200	8	1.63432	486	419	509	415	23.3452
8	6	100	8	1.61713	770	434	782	437	12.3693
8	6	200	1	1.34794	486	349	473	358	15.8114
8	6	300	8	1.8852	580	666	574	681	16.1555
8	6	300	1	2.12447	913	191	934	185	21.8403
8	6	100	0.5	0.903993	596	334	598	329	5.38516
8	6	200	0.5	2.87349	486	349	506	345	20.3961
8	6	100	0.5	1.89179	619	461	610	480	21.0238
8	6	200	4	1.48995	718	581	740	615	40.4969
8	6	200	0.5	2.46571	783	557	811	593	45.607
8	6	100	2	1.34451	619	461	635	454	17.4642
8	6	300	2	2.39438	453	191	536	259	107.299
8	6	300	8	1.27757	943	234	962	229	19.6469
8	6	100	2	3.92244	760	448	770	471	25.0799
8	6	300	4	1.65245	965	281	883	328	94.5145
8	6	200	1	1.46431	783	557	809	560	26.1725
8	6	100	0.5	0.898363	649	290	647	291	2.23607
8	6	100	2	1.12881	589	418	574	420	15.1327
8	6	100	4	1.26579	777	350	791	341	16.6433
8	6	200	8	1.05592	836	513	866	525	32.311
8	6	200	2	1.5098	486	349	569	310	91.7061
8	6	200	4	1.11849	880	349	861	358	21.0238
8	6	300	0.5	6.67086	453	577	873	311	497.148
8	6	100	8	0.805767	633	297	642	309	15
8	6	200	4	1.22236	880	349	886	341	10
8	6	300	1	1.50829	423	234	420	233	3.16228
8	6	300	8	1.42992	913	577	997	626	97.2471
8	6	300	1	2.13768	786	666	833	701	58.6003
8	6	300	2	1.4098	943	534	944	561	27.0185
8	6	100	1	0.734339	585	401	613	416	31.7648
8	6	200	4	1.40965	510	484	515	489	7.07107
9	1	100	0.5	1.88962	633	297	626	284	14.7648
9	1	200	2	2.17837	495	316	515	319	20.2237
9	1	200	1	2.8058	783	557	815	568	33.8378
9	1	200	1	1.86808	615	572	619	589	17.4642
9	1	200	2	2.11805	495	316	510	334	23.4307
9	1	100	8	1.78026	606	448	605	436	12.0416
9	1	200	8	2.23246	836	255	858	252	22.2036
9	1	300	0.5	2.07258	631	89	653	76	25.5539
9	1	300	2	1.69842	423	534	395	549	31.7648
9	1	100	4	1.83252	770	334	779	317	19.2354
9	1	300	8	1.54747	423	534	445	560	34.0588
9	1	100	4	1.00238	717	290	731	250	42.3792
9	1	200	0.5	2.13709	880	419	874	428	10.8167
9	1	100	8	1.1342	649	478	867	254	312.57
9	1	300	8	2.05833	965	281	985	287	20.8806
9	1	300	0.5	2.21577	965	487	975	507	22.3607
9	1	300	4	1.66316	943	234	923	234	20
9	1	300	1	1.64223	735	679	751	644	38.4838
9	1	200	2	1.83825	554	537	559	536	5.09902
9	1	300	2	1.90597	965	487	940	480	25.9615
9	1	100	0.5	0.966322	606	320	597	302	20.1246
9	1	300	2	1.51384	453	191	448	169	22.561
9	1	300	8	2.07526	401	281	396	257	24.5153
9	1	100	4	1.6657	777	418	795	428	20.5913
9	1	100	4	1.85139	606	320	585	265	58.8727
9	1	100	1	2.2759	781	401	790	402	9.05539
9	1	100	4	0.882132	781	401	793	401	12
9	1	200	1	2.19195	495	316	503	323	10.6301
9	1	200	0.5	1.64744	510	484	527	481	17.2627
9	1	200	1	1.54619	530	255	542	252	12.3693
9	2	200	1	0.780178	880	349	861	361	22.4722
9	2	300	1	1.56518	913	577	922	592	17.4929
9	2	200	2	2.03686	583	557	577	568	12.53
9	2	100	0.5	1.12414	585	367	588	357	10.4403
9	2	300	1	2.07056	453	191	451	158	33.0606
9	2	200	1	1.55739	510	484	515	470	14.8661
9	2	200	4	1.46041	554	537	527	546	28.4605
9	2	300	0.5	1.41264	533	644	530	657	13.3417
9	2	100	0.5	0.896129	760	448	777	452	17.4642
9	2	200	4	1.59484	530	255	536	238	18.0278
9	2	100	1	0.97615	733	297	750	288	19.2354
9	2	100	2	0.858617	770	434	776	433	6.08276
9	2	200	8	0.945754	648	187	637	165	24.5967
9	2	100	4	1.19614	781	367	793	355	16.9706
9	2	100	8	1.57208	649	478	640	488	13.4536
9	2	300	0.5	1.36783	913	577	928	589	19.2094
9	2	100	2	0.945761	666	286	668	273	13.1529
9	2	200	1	1.20445	554	537	568	555	22.8035
9	2	300	8	1.10777	423	234	422	219	15.0333
9	2	200	2	0.93531	871	316	881	303	16.4012
9	2	100	8	1.30036	700	286	722	266	29.7321
9	2	100	4	1.1978	666	286	653	261	28.178
9	2	300	0.5	1.02012	453	191	448	198	8.60233
9	2	300	0.5	1.38413	876	154	876	154	0
9	2	200	8	1.95172	615	572	608	576	8.06226
9	2	100	8	1.11831	606	448	579	454	27.6586
9	2	200	4	1.75212	718	187	712	162	25.7099
9	2	300	4	1.49411	631	89	623	87	8.24621
9	2	300	2	1.57581	786	666	811	672	25.7099
9	2	300	2	1.02395	490	154	492	134	20.0998
9	3	200	8	0.933659	751	572	765	548	27.7849
9	3	200	4	1.54337	812	537	825	520	21.4009
9	3	200	2	1.20906	554	537	517	545	37.855
9	3	100	8	1.1762	666	286	650	295	18.3576
9	3	300	8	2.16178	631	89	622	92	9.48683
9	3	200	1	1.68399	812	537	835	541	23.3452
9	3	300	0.5	1.65215	876	614	889	610	13.6015
9	3	200	1	1.15	783	557	793	552	11.1803
9	3	300	4	0.878279	580	666	563	663	17.2627
9	3	200	0.5	1.61713	751	196	748	180	16.2788
9	3	100	2	1.10373	781	367	787	355	13.4164
9	3	200	0.5	1.07205	871	452	874	443	9.48683
9	3	200	4	1.48417	554	537	571	542	17.72
9	3	200	2	1.31286	648	581	650	577	4.47214
9	3	300	1	1.2979	786	666	807	672	21.8403
9	3	100	2	1.51997	747	461	751	443	18.4391
9	3	100	8	0.897384	777	350	768	349	9.05539
9	3	100	8	0.773934	747	307	762	285	26.6271
9	3	300	8	1.23399	978	436	1000	438	22.0907
9	3	200	1	1.62382	871	316	880	320	9.84886
9	3	300	1	1.44224	833	644	858	645	25.02
9	3	100	0.5	1.24433	733	471	741	467	8.94427
9	3	300	1	1.23221	978	436	969	443	11.4018
9	3	300	4	1.26975	876	154	875	152	2.23607
9	3	100	0.5	0.888076	770	334	771	322	12.0416
9	3	100	2	1.24819	666	482	670	463	19.4165
9	3	100	0.5	1.0502	606	448	603	443	5.83095
9	3	100	2	1.13762	649	290	646	274	16.2788
9	3	300	4	1.69002	913	191	911	182	9.21954
9	3	300	4	1.09993	580	102	564	107	16.7631
9	4	100	1	1.36785	596	434	589	432	7.28011
9	4	300	4	1.23958	833	124	817	131	17.4642
9	4	300	8	1.66815	388	332	409	327	21.587
9	4	200	1	1.43821	510	484	525	474	18.0278
9	4	300	2	1.52407	965	281	992	292	29.1548
9	4	300	1	1.70009	833	124	856	115	24.6982
9	4	200	8	1.52617	510	484	533	474	25.0799
9	4	200	4	1.19587	836	255	845	259	9.84886
9	4	200	4	0.916003	648	187	634	164	26.9258
9	4	100	0.5	0.702189	649	478	646	490	12.3693
9	4	100	0.5	0.91252	770	334	785	326	17
9	4	200	8	1.27138	648	187	628	190	20.2237
9	4	100	2	0.900306	770	434	780	436	10.198
9	4	300	0.5	1.74426	423	234	430	223	13.0384
9	4	100	2	1.46357	760	448	766	447	6.08276
9	4	300	2	0.988868	580	102	582	101	2.23607
9	4	300	4	1.8121	735	89	739	80	9.84886
9	4	100	4	1.22187	777	418	789	405	17.6918
9	4	300	0.5	1.01159	631	89	633	80	9.21954
9	4	100	8	1.14791	760	448	761	439	9.05539
9	4	100	1	0.843326	700	286	698	285	2.23607
9	4	300	2	1.22897	631	89	619	108	22.4722
9	4	200	8	1.42036	812	231	800	196	37
9	4	200	0.5	1.51095	812	231	803	220	14.2127
9	4	200	1	1.3918	615	572	610	550	22.561
9	4	200	1	1.42991	856	484	850	464	20.8806
9	4	100	0.5	1.66459	585	401	584	391	10.0499
9	4	100	8	1.49835	596	434	579	427	18.3848
9	4	300	4	1.82766	978	436	973	426	11.1803
9	4	200	2	1.09601	856	484	829	477	27.8927
9	5	200	0.5	1.48661	530	255	543	245	16.4012
9	5	300	8	1.29801	490	154	481	138	18.3576
9	5	100	2	1.18203	649	478	638	477	11.0454
9	5	200	8	0.895761	718	581	738	569	23.3238
9	5	100	0.5	1.40976	770	334	780	320	17.2047
9	5	300	2	1.98561	453	577	425	564	30.8707
9	5	300	8	2.09378	631	679	625	658	21.8403
9	5	200	0.5	1.3381	880	349	869	355	12.53
9	5	100	1	1.69014	770	434	782	438	12.6491
9	5	300	1	1.60249	388	436	406	412	30
9	5	100	1	1.69649	606	448	605	458	10.0499
9	5	100	4	1.23172	633	471	637	465	7.2111
9	5	100	8	1.637	606	320	617	322	11.1803
9	5	300	1	1.46445	943	534	948	561	27.4591
9	5	200	4	1.5462	486	419	525	409	40.2616
9	5	200	0.5	1.3277	648	581	656	568	15.2643
9	5	200	4	0.984733	871	452	888	465	21.4009
9	5	300	4	1.55166	580	666	591	668	11.1803
9	5	200	2	0.986283	583	557	583	542	15
9	5	300	4	1.49017	943	234	948	196	38.3275
9	5	200	4	0.834438	495	452	494	441	11.0454
9	5	100	2	1.52371	585	367	596	363	11.7047
9	5	100	8	1.15638	666	286	658	288	8.24621
9	5	100	0.5	1.20433	633	297	619	267	33.1059
9	5	300	1	0.753913	533	644	523	683	40.2616
9	5	200	2	2.0222	486	349	496	331	20.5913
9	5	200	0.5	1.47835	510	484	529	484	19
9	5	300	8	2.01826	423	534	399	511	33.2415
9	5	300	1	1.26826	453	191	471	176	23.4307
9	5	100	2	1.12184	649	290	639	276	17.2047
9	6	200	4	0.963774	583	557	621	536	43.4166
9	6	300	4	2.02786	735	89	744	74	17.4929
9	6	300	0.5	1.31633	453	191	446	168	24.0416
9	6	100	1	1.25415	649	478	641	481	8.544
9	6	300	2	1.58852	786	102	804	68	38.4708
9	6	100	2	1.23558	733	297	735	283	14.1421
9	6	300	1	1.5046	580	102	590	106	10.7703
9	6	100	1	1.38602	589	350	593	337	13.6015
9	6	100	2	0.94612	606	320	602	319	4.12311
9	6	100	8	1.1596	700	286	697	279	7.61577
9	6	100	1	1.41441	585	401	580	398	5.83095
9	6	200	0.5	1.42698	530	513	535	513	5
9	6	300	0.5	1.34161	978	436	972	436	6
9	6	200	8	1.31072	836	513	843	509	8.06226
9	6	100	8	1.02429	747	461	756	450	14.2127
9	6	300	4	1.12798	735	679	748	675	13.6015
9	6	200	4	0.935843	486	349	482	345	5.65685
9	6	200	8	1.11606	836	255	872	228	45
9	6	200	1	0.85603	836	255	848	205	51.4198
9	6	300	0.5	0.988694	423	534	412	538	11.7047
9	6	100	2	1.06171	649	290	655	289	6.08276
9	6	300	1	2.21828	978	332	950	332	28
9	6	200	4	0.866601	836	513	836	512	1
9	6	300	0.5	2.06221	631	89	614	72	24.0416
9	6	200	8	1.87853	530	513	540	500	16.4012
9	6	200	2	1.17002	856	484	861	474	11.1803
9	6	200	2	1.80309	751	572	746	544	28.4429
9	6	100	0.5	1.34199	747	461	764	458	17.2627
9	6	100	8	1.7342	717	290	739	249	46.5296
9	6	300	4	2.27764	943	234	954	218	19.4165
10	1	300	4	1.37371	490	614	463	638	36.1248
10	1	200	4	1.2198	856	284	825	280	31.257
10	1	300	1	1.59359	876	154	874	169	15.1327
10	1	300	2	1.22586	913	191	896	202	20.2485
10	1	100	1	0.941839	777	418	774	421	4.24264
10	1	200	1	1.19362	510	284	533	285	23.0217
10	1	200	0.5	1.11793	783	211	783	241	30
10	1	200	8	1.40994	648	187	647	224	37.0135
10	1	100	2	0.793591	649	290	655	307	18.0278
10	1	300	4	1.70598	580	666	580	654	12
10	1	200	8	1.43513	583	211	616	243	45.9674
10	1	200	1	1.40784	812	231	811	218	13.0384
10	1	100	8	1.03898	760	448	739	436	24.1868
10	1	100	8	1.20597	596	434	591	439	7.07107
10	1	100	8	0.948134	747	307	725	325	28.4253
10	1	300	2	1.2343	735	89	743	67	23.4094
10	1	200	1	2.01512	583	557	589	551	8.48528
10	1	300	2	1.65047	453	577	437	608	34.8855
10	1	300	2	1.18371	453	577	456	575	3.60555
10	1	200	0.5	1.58869	510	284	528	294	20.5913
10	1	100	4	1.17037	606	448	612	443	7.81025
10	1	100	0.5	0.912316	589	350	610	357	22.1359
10	1	100	8	1.12747	589	418	598	406	15
10	1	200	0.5	1.32586	648	581	622	564	31.0644
10	1	200	0.5	1.17419	510	484	514	475	9.84886
10	1	300	4	1.23805	388	332	414	347	30.0167
10	1	100	2	1.1964	781	401	775	398	6.7082
10	1	100	1	1.25181	777	350	784	352	7.28011
10	1	300	0.5	3.90208	533	124	530	68	56.0803
10	1	300	4	1.34639	490	154	483	153	7.07107
10	2	200	0.5	0.931737	615	572	597	605	37.5899
10	2	100	4	1.04646	747	307	743	316	9.84886
10	2	300	1	1.04469	388	332	424	325	36.6742
10	2	300	4	1.35357	533	644	517	661	23.3452
10	2	300	0.5	1.17615	423	234	440	219	22.6716
10	2	200	2	0.905594	615	196	609	184	13.4164
10	2	300	1	1.37405	786	666	816	666	30
10	2	300	8	1.17372	943	534	981	581	60.4401
10	2	200	4	0.900513	615	196	644	212	33.121
10	2	100	8	1.3644	700	482	712	483	12.0416
10	2	200	2	0.956407	783	557	798	559	15.1327
10	2	300	4	1.11008	388	332	462	349	75.9276
10	2	100	2	0.899465	717	290	719	293	3.60555
10	2	300	4	1.35943	533	644	538	674	30.4138
10	2	200	8	0.975751	615	196	628	302	106.794
10	2	200	0.5	1.20017	880	419	934	427	54.5894
10	2	100	2	1.06389	777	418	767	402	18.868
10	2	200	1	1.22226	486	419	483	433	14.3178
10	2	100	4	0.953773	747	461	736	448	17.0294
10	2	300	8	1.6137	833	644	852	655	21.9545
10	2	200	8	1.1467	554	537	538	549	20
10	2	100	2	0.957539	596	334	608	359	27.7308
10	2	100	0.5	1.00571	717	478	727	473	11.1803
10	2	100	1	3.47746	589	350	728	453	173.003
10	2	100	2	1.28651	666	286	662	291	6.40312
10	2	300	1	2.57812	490	154	497	126	28.8617
10	2	100	1	0.826034	760	320	774	311	16.6433
10	2	300	8	1.24389	913	577	912	586	9.05539
10	2	200	0.5	1.05599	718	581	730	574	13.8924
10	2	200	0.5	0.955371	812	537	810	521	16.1245
10	3	300	0.5	0.941009	490	614	478	652	39.8497
10	3	300	2	1.23249	943	534	991	548	50
10	3	100	1	1.22234	585	401	605	403	20.0998
10	3	300	8	1.14192	533	124	548	194	71.5891
10	3	100	2	0.897863	760	320	750	323	10.4403
10	3	200	2	1.04821	530	513	564	495	38.4708
10	3	100	1	1.29345	781	367	777	360	8.06226
10	3	200	4	1.1681	530	255	559	286	42.45
10	3	300	8	1.31366	631	89	599	120	44.5533
10	3	100	1	1.48389	781	401	804	385	28.0179
10	3	300	4	1.5329	735	679	747	680	12.0416
10	3	200	8	1.3827	871	316	866	314	5.38516
10	3	300	1	1.26969	833	124	818	136	19.2094
10	3	300	8	1.36251	735	679	751	703	28.8444
10	3	300	0.5	1.20638	786	666	820	674	34.9285
10	3	100	4	1.0846	747	307	751	327	20.3961
10	3	200	4	1.25021	554	537	553	545	8.06226
10	3	200	2	1.14453	486	419	527	417	41.0488
10	3	200	8	1.57776	718	187	717	246	59.0085
10	3	100	4	0.903518	633	471	632	468	3.16228
10	3	200	4	1.1875	648	187	663	201	20.5183
10	3	200	2	1.04405	554	231	586	231	32
10	3	100	0.5	0.96034	596	434	606	447	16.4012
10	3	300	1	1.12234	735	679	755	689	22.3607
10	3	100	2	0.998108	781	367	775	363	7.2111
10	3	300	0.5	1.44374	786	666	804	663	18.2483
10	3	200	0.5	0.877837	871	452	888	446	18.0278
10	3	100	1	0.955646	700	286	710	283	10.4403
10	3	200	0.5	1.5718	495	452	518	458	23.7697
10	3	100	8	1.34004	666	482	644	489	23.0868
10	4	200	0.5	1.15837	495	452	521	444	27.2029
10	4	300	4	1.24748	876	154	884	194	40.7922
10	4	100	8	1.89215	585	367	592	360	9.89949
10	4	300	8	1.30843	978	332	996	297	39.3573
10	4	100	0.5	1.37253	666	286	660	282	7.2111
10	4	200	8	1.17205	648	187	664	219	35.7771
10	4	100	8	1.22903	760	448	752	441	10.6301
10	4	100	2	0.957082	700	286	696	280	7.2111
10	4	300	1	1.11216	965	487	969	496	9.84886
10	4	300	2	1.49172	913	577	917	582	6.40312
10	4	300	1	1.24548	965	281	977	280	12.0416
10	4	200	1	1.1943	812	537	825	530	14.7648
10	4	200	2	1.23609	718	581	737	592	21.9545
10	4	300	8	1.17067	978	332	955	319	26.4197
10	4	300	0.5	1.16188	786	666	789	679	13.3417
10	4	300	0.5	0.727515	580	102	568	92	15.6205
10	4	200	0.5	1.0824	486	349	513	345	27.2947
10	4	200	1	1.11015	530	513	555	486	36.7967
10	4	200	4	1.16802	554	231	526	219	30.4631
10	4	200	4	1.6096	812	537	847	512	43.0116
10	4	300	4	0.987614	943	234	891	233	52.0096
10	4	100	1	0.917084	619	307	620	326	19.0263
10	4	100	1	0.864494	733	471	741	466	9.43398
10	4	100	2	0.912383	747	461	753	454	9.21954
10	4	200	0.5	1.05982	718	581	723	589	9.43398
10	4	100	8	0.898	717	290	721	320	30.2655
10	4	200	4	1.12583	648	187	673	173	28.6531
10	4	100	2	0.962435	666	482	660	476	8.48528
10	4	100	2	0.981814	777	350	763	352	14.1421
10	4	300	4	1.14178	876	154	880	166	12.6491
10	5	200	0.5	1.0257	615	572	624	543	30.3645
10	5	300	1	1.28013	978	436	991	444	15.2643
10	5	300	0.5	1.07375	965	281	964	282	1.41421
10	5	200	2	0.983751	648	187	664	184	16.2788
10	5	200	8	1.38574	812	537	818	522	16.1555
10	5	200	1	2.45579	871	316	864	299	18.3848
10	5	100	4	1.42268	747	461	757	448	16.4012
10	5	300	2	2.16377	401	281	379	258	31.8277
10	5	200	4	1.21555	530	255	542	244	16.2788
10	5	300	0.5	1.77238	735	89	727	77	14.4222
10	5	200	4	1.08051	871	316	874	271	45.0999
10	5	200	1	1.07633	486	419	482	422	5
10	5	100	8	0.873596	666	482	645	455	34.2053
10	5	200	2	12.4652	751	196	868	100	151.344
10	5	100	2	1.08369	633	471	635	447	24.0832
10	5	200	0.5	1.98059	836	513	862	531	31.6228
10	5	300	8	1.32195	423	234	386	204	47.634
10	5	100	2	1.15639	700	286	764	278	64.4981
10	5	100	1	1.11035	770	334	772	342	8.24621
10	5	100	2	0.873794	717	290	722	312	22.561
10	5	300	4	1.12837	388	332	441	335	53.0848
10	5	100	4	1.29746	777	350	760	363	21.4009
10	5	100	8	0.892788	633	471	629	444	27.2947
10	5	100	1	1.10604	606	320	627	326	21.8403
10	5	300	8	1.43693	533	124	540	88	36.6742
10	5	300	1	1.40163	876	154	887	107	48.2701
10	5	200	0.5	0.917915	880	349	867	336	18.3848
10	5	300	8	1.60404	833	124	858	126	25.0799
10	5	100	4	1.08779	649	290	646	298	8.544
10	5	300	0.5	1.20193	401	281	446	289	45.7056
10	6	200	8	0.966395	751	572	763	564	14.4222
10	6	300	4	1.39954	965	281	1043	228	94.3027
10	6	100	8	1.19762	633	297	622	307	14.8661
10	6	200	0.5	1.86792	648	187	668	174	23.8537
10	6	200	8	18.748	812	231	649	395	231.225
10	6	200	0.5	0.907761	836	513	828	513	8
10	6	300	0.5	0.910135	533	124	544	89	36.6879
10	6	100	1	1.13044	633	471	638	465	7.81025
10	6	200	1	0.8679	648	581	643	572	10.2956
10	6	200	4	0.946295	554	537	560	515	22.8035
10	6	100	4	1.30774	619	307	617	318	11.1803
10	6	100	0.5	0.915882	585	367	619	370	34.1321
10	6	300	4	1.1039	490	614	519	623	30.3645
10	6	100	4	0.881772	666	286	683	282	17.4642
10	6	200	1	1.43956	812	231	833	200	37.4433
10	6	100	8	1.44427	747	461	756	457	9.84886
10	6	300	8	1.42502	978	332	966	340	14.4222
10	6	300	2	1.75207	388	436	354	448	36.0555
10	6	300	2	1.09445	423	234	487	243	64.6297
10	6	200	8	1.82814	495	452	508	417	37.3363
10	6	200	2	1.14393	583	557	582	553	4.12311
10	6	100	2	1.12398	717	290	724	312	23.0868
10	6	200	0.5	1.36441	583	211	610	211	27
10	6	100	2	1.05356	633	471	624	457	16.6433
10	6	300	4	1.28958	786	102	835	117	51.2445
10	6	100	1	0.980402	717	478	714	464	14.3178
10	6	300	1	1.02169	453	191	465	150	42.72
10	6	300	2	1.07003	833	124	872	80	58.7963
10	6	300	0.5	0.929784	833	124	827	129	7.81025
10	6	100	1	1.12526	633	471	614	489	26.1725
11	1	300	2	1.90997	978	332	955	331	23.0217
11	1	300	4	1.01179	833	644	859	646	26.0768
11	1	300	0.5	1.19378	978	332	983	342	11.1803
11	1	100	4	1.60816	585	401	601	411	18.868
11	1	100	1	1.1094	649	290	637	292	12.1655
11	1	100	2	0.898041	666	286	651	287	15.0333
11	1	200	1	1.5985	583	557	592	562	10.2956
11	1	100	4	1.1143	649	290	631	296	18.9737
11	1	100	1	1.1416	596	334	586	343	13.4536
11	1	300	8	1.36817	943	234	977	220	36.7696
11	1	200	2	1.25043	812	231	827	226	15.8114
11	1	200	4	1.23935	751	196	743	218	23.4094
11	1	300	4	1.1244	735	89	730	83	7.81025
11	1	100	8	1.03867	589	418	614	423	25.4951
11	1	200	0.5	1.34805	486	349	491	358	10.2956
11	1	200	8	1.60559	718	581	717	599	18.0278
11	1	300	4	1.44856	401	487	371	523	46.8615
11	1	200	2	1.37484	486	419	458	419	28
11	1	200	0.5	0.757134	856	484	833	497	26.4197
11	1	300	2	1.29771	913	577	910	578	3.16228
11	1	100	0.5	1.91466	606	320	602	319	4.12311
11	1	200	8	2.4982	615	196	583	185	33.8378
11	1	200	2	1.47859	530	513	556	509	26.3059
11	1	100	1	2.06618	717	478	712	469	10.2956
11	1	300	0.5	1.57615	978	436	968	446	14.1421
11	1	300	1	3.26927	978	436	1007	440	29.2746
11	1	100	8	1.10209	666	482	665	461	21.0238
11	1	300	0.5	1.20019	978	332	1019	319	43.0116
11	1	200	1	1.72071	783	557	772	544	17.0294
11	1	100	8	1.68926	596	334	593	337	4.24264
11	2	100	4	1.36625	781	401	772	405	9.84886
11	2	200	4	1.22824	836	513	855	553	44.2832
11	2	100	2	1.46954	717	290	721	281	9.84886
11	2	300	0.5	1.98998	631	89	627	78	11.7047
11	2	100	4	0.936311	700	482	693	483	7.07107
11	2	200	1	1.95531	871	316	845	326	27.8568
11	2	100	1	2.03257	596	334	609	343	15.8114
11	2	100	8	0.961742	770	334	751	343	21.0238
11	2	100	0.5	1.89081	666	482	656	489	12.2066
11	2	200	8	1.97113	615	196	579	211	39
11	2	100	1	0.936436	781	401	770	406	12.083
11	2	100	0.5	2.60851	649	290	625	313	33.2415
11	2	300	4	1.91979	631	679	631	697	18
11	2	200	2	1.83193	718	581	719	587	6.08276
11	2	300	8	1.57136	423	234	371	247	53.6004
11	2	200	1	0.985956	530	513	524	506	9.21954
11	2	100	1	1.72303	666	286	644	296	24.1661
11	2	300	0.5	1.26437	913	577	882	597	36.8917
11	2	200	2	1.03102	880	349	857	351	23.0868
11	2	300	4	1.0839	401	487	429	532	53
11	2	300	2	0.996115	965	487	903	491	62.1289
11	2	300	0.5	2.05969	786	666	801	674	17
11	2	300	8	1.65231	735	679	746	690	15.5563
11	2	200	8	1.31989	751	196	744	217	22.1359
11	2	200	0.5	1.09625	495	316	515	326	22.3607
11	2	200	1	1.25015	718	187	724	199	13.4164
11	2	300	2	1.51484	876	614	858	636	28.4253
11	2	200	8	0.948611	836	255	832	269	14.5602
11	2	100	4	1.32633	777	350	769	335	17
11	2	300	2	1.29793	388	436	336	468	61.0574
11	3	200	8	2.08677	812	231	785	294	68.542
11	3	300	4	1.27602	401	487	440	513	46.8722
11	3	100	0.5	0.982847	770	334	760	338	10.7703
11	3	200	1	1.38208	615	196	592	208	25.9422
11	3	200	0.5	1.14045	812	231	803	246	17.4929
11	3	200	2	1.67849	718	187	729	181	12.53
11	3	300	8	1.86667	786	102	800	119	22.0227
11	3	200	1	1.33868	718	187	714	213	26.3059
11	3	300	1	1.22628	786	666	772	667	14.0357
11	3	300	4	1.86418	786	666	787	682	16.0312
11	3	200	8	1.89785	554	537	552	512	25.0799
11	3	300	2	1.40267	401	281	353	281	48
11	3	100	4	1.11375	649	290	636	309	23.0217
11	3	100	2	1.56643	619	461	629	450	14.8661
11	3	100	1	1.0363	619	461	648	450	31.0161
11	3	100	8	0.892126	733	471	720	445	29.0689
11	3	100	1	1.66631	747	461	748	461	1
11	3	300	8	1.95618	876	154	892	118	39.3954
11	3	100	0.5	1.99048	596	334	592	343	9.84886
11	3	300	4	1.22596	388	436	431	454	46.6154
11	3	100	2	1.03414	777	350	751	350	26
11	3	300	4	1.80086	876	154	927	127	57.7062
11	3	200	8	1.30186	880	349	860	338	22.8254
11	3	200	2	1.77007	836	513	806	513	30
11	3	200	0.5	1.25382	530	513	575	520	45.5412
11	3	100	0.5	1.34403	585	401	577	421	21.5407
11	3	300	2	2.46784	533	644	566	669	41.4005
11	3	300	0.5	2.20672	876	614	906	621	30.8058
11	3	200	1	3.69572	856	284	848	284	8
11	3	100	4	1.81232	781	401	783	401	2
11	4	300	1	1.13379	965	281	953	276	13
11	4	100	1	1.31174	777	350	768	339	14.2127
11	4	300	1	1.48996	580	102	561	92	21.4709
11	4	100	0.5	1.37677	781	367	785	358	9.84886
11	4	200	0.5	1.206	554	537	592	511	46.0435
11	4	200	2	1.59821	495	452	513	474	28.4253
11	4	300	8	2.28608	580	666	564	710	46.8188
11	4	300	8	1.68385	735	679	734	638	41.0122
11	4	200	0.5	1.37827	495	316	504	313	9.48683
11	4	200	0.5	8.18479	836	255	831	252	5.83095
11	4	200	1	1.51255	812	231	812	247	16
11	4	100	8	1.77031	633	297	612	314	27.0185
11	4	200	8	1.5468	495	452	537	488	55.3173
11	4	100	4	1.06408	770	334	784	322	18.4391
11	4	300	4	1.51021	423	234	397	233	26.0192
11	4	200	2	1.40767	648	187	629	185	19.105
11	4	100	0.5	1.50022	747	307	750	304	4.24264
11	4	300	0.5	1.53013	943	534	903	521	42.0595
11	4	300	8	1.73211	786	102	798	76	28.6356
11	4	200	4	0.938127	486	419	554	437	70.342
11	4	100	2	1.13631	717	290	713	298	8.94427
11	4	100	2	1.46015	717	478	710	472	9.21954
11	4	100	4	1.69409	619	307	587	273	46.6905
11	4	300	8	1.66444	965	281	1065	275	100.18
11	4	200	2	1.14804	486	349	521	371	41.3401
11	4	300	4	1.66958	453	191	432	164	34.2053
11	4	200	2	1.34513	718	187	731	178	15.8114
11	4	100	1	1.43263	747	307	747	306	1
11	4	300	4	1.39013	490	614	478	662	49.4773
11	4	100	1	1.06658	666	482	668	461	21.095
11	5	100	8	1.41119	717	478	723	465	14.3178
11	5	300	1	1.19222	631	89	599	87	32.0624
11	5	200	0.5	1.90181	648	581	629	575	19.9249
11	5	300	4	1.29201	735	89	756	70	28.3196
11	5	100	2	2.08814	777	350	759	335	23.4307
11	5	300	2	1.47373	388	332	400	344	16.9706
11	5	300	0.5	1.19435	533	124	517	111	20.6155
11	5	200	0.5	1.39197	751	572	745	545	27.6586
11	5	300	1	1.25309	735	679	754	674	19.6469
11	5	300	8	1.24422	735	89	754	76	23.0217
11	5	100	1	0.984402	633	297	635	308	11.1803
11	5	200	2	1.52416	583	557	591	524	33.9559
11	5	100	0.5	1.0024	666	482	665	471	11.0454
11	5	200	8	1.78004	812	537	752	483	80.7217
11	5	200	8	1.99256	751	572	739	565	13.8924
11	5	100	1	1.6844	781	367	751	366	30.0167
11	5	100	1	1.82888	777	418	781	423	6.40312
11	5	300	4	2.49522	965	487	974	475	15
11	5	200	8	1.65199	495	316	466	315	29.0172
11	5	100	4	1.46164	619	461	641	436	33.3017
11	5	300	2	1.61032	388	436	430	459	47.8853
11	5	200	0.5	1.52579	783	557	759	577	31.241
11	5	100	4	1.49185	760	320	760	315	5
11	5	300	0.5	1.86064	978	436	963	456	25
11	5	100	1	1.19576	585	401	612	413	29.5466
11	5	200	4	1.46691	615	572	646	554	35.8469
11	5	100	2	1.7836	619	307	612	303	8.06226
11	5	300	2	1.48769	943	234	974	218	34.8855
11	5	200	4	1.63997	880	349	894	335	19.799
11	5	200	8	1.31778	783	211	753	233	37.2022
11	6	300	4	1.46268	580	102	558	118	27.2029
11	6	100	1	0.994484	747	307	736	316	14.2127
11	6	300	2	1.4684	876	154	887	147	13.0384
11	6	200	4	2.70346	648	581	635	581	13
11	6	200	2	1.28263	856	484	832	490	24.7386
11	6	100	1	1.48632	619	461	632	452	15.8114
11	6	300	8	1.2826	423	234	413	236	10.198
11	6	100	8	1.36711	596	334	601	333	5.09902
11	6	300	0.5	1.3481	388	332	392	335	5
11	6	100	0.5	1.18776	589	350	604	351	15.0333
11	6	300	8	1.476	388	332	311	356	80.6536
11	6	300	0.5	1.86764	580	102	577	83	19.2354
11	6	200	4	1.12434	783	211	792	201	13.4536
11	6	200	8	1.31979	615	196	600	242	48.3839
11	6	200	1	1.20976	836	255	806	274	35.5106
11	6	300	1	1.27257	490	614	488	623	9.21954
11	6	200	4	1.322	510	484	540	481	30.1496
11	6	200	1	1.21232	783	557	801	546	21.095
11	6	300	0.5	1.48029	453	191	450	195	5
11	6	200	4	1.09846	871	452	808	447	63.1981
11	6	300	8	1.27825	423	234	369	202	62.7694
11	6	100	2	1.51629	633	471	625	462	12.0416
11	6	300	4	1.5732	735	679	742	692	14.7648
11	6	100	2	1.25228	589	418	595	414	7.2111
11	6	200	8	1.7544	856	484	787	443	80.2621
11	6	100	2	0.969994	700	482	702	472	10.198
11	6	200	2	2.31872	836	513	833	489	24.1868
11	6	100	1	1.23411	666	482	659	465	18.3848
11	6	100	0.5	1.37425	781	401	762	397	19.4165
11	6	100	0.5	1.30641	585	367	576	363	9.84886
12	1	100	2	1.63754	777	418	766	418	11
12	1	300	2	1.07211	965	487	945	496	21.9317
12	1	300	0.5	2.33792	580	102	551	99	29.1548
12	1	200	4	1.89361	486	349	508	350	22.0227
12	1	100	8	1.7818	606	448	600	446	6.32456
12	1	100	1	1.11461	733	297	724	277	21.9317
12	1	200	1	0.813886	880	349	887	349	7
12	1	100	8	1.03171	717	478	722	458	20.6155
12	1	300	1	1.38984	735	679	759	718	45.793
12	1	300	8	1.38198	786	102	821	87	38.0789
12	1	300	1	2.22812	943	534	948	535	5.09902
12	1	100	4	0.828001	606	320	600	312	10
12	1	300	1	1.69836	453	577	421	627	59.3633
12	1	100	2	1.68546	717	290	728	308	21.095
12	1	300	4	1.41455	965	281	955	279	10.198
12	1	300	2	1.63045	631	89	612	76	23.0217
12	1	100	4	1.74587	666	482	697	531	57.9828
12	1	100	2	1.4085	633	297	632	303	6.08276
12	1	100	1	1.25409	747	307	747	294	13
[truncated: 2,141 more rows]

## Sheet: RRMS
Subject_ID	Block_Number	Distance (pixel)	Delay_Interval	Reaction_Time (seconds)	Target_location (x_axis)	Target_location (y_axis)	Subject_response (x_axis)	Subject_response (y_axis)	Response error (pixel)
1	1	300	8	18.279	460	679	495	372	308.989
1	1	100	0.5	5.98368	435	320	321	144	209.695
1	1	200	2	2.17664	612	211	590	198	25.5539
1	1	300	8	3.91497	742	191	673	169	72.4224
1	1	300	4	3.28633	807	332	777	297	46.0977
1	1	100	8	4.95612	589	448	583	416	32.5576
1	1	200	0.5	3.30444	665	255	673	250	9.43398
1	1	300	0.5	2.39485	362	124	349	139	19.8494
1	1	100	8	3.17126	610	367	579	393	40.4599
1	1	100	2	1.84761	462	471	479	454	24.0416
1	1	200	1	1.81341	685	284	656	260	37.6431
1	1	200	1	3.41212	665	513	642	499	26.9258
1	1	100	0.5	2.51594	576	461	620	524	76.844
1	1	100	4	2.16194	589	448	618	468	35.2278
1	1	200	1	1.7316	412	557	429	595	41.6293
1	1	200	4	7.46152	315	419	351	448	46.2277
1	1	200	1	3.16476	383	231	374	248	19.2354
1	1	300	0.5	2.10873	807	332	774	338	33.541
1	1	100	4	2.90216	529	286	512	304	24.7588
1	1	300	2	2.18754	564	89	547	101	20.8087
1	1	300	2	2.89024	230	487	202	560	78.1857
1	1	300	0.5	2.99989	807	332	826	341	21.0238
1	1	300	4	2.85327	705	614	738	604	34.4819
1	1	200	1	2.0471	412	557	409	597	40.1123
1	1	200	8	2.11443	315	419	331	469	52.4976
1	1	200	1	3.0595	709	349	710	359	10.0499
1	1	100	8	1.95595	495	286	496	319	33.0151
1	1	100	2	1.8294	435	448	405	461	32.6956
1	1	100	4	2.47297	562	471	554	460	13.6015
1	1	300	2	2.52548	772	234	751	245	23.7065
1	2	300	8	2.33103	230	281	228	352	71.0282
1	2	300	2	3.14866	615	666	641	665	26.0192
1	2	100	0.5	1.10884	606	418	606	412	6
1	2	200	2	2.70141	359	513	355	510	5
1	2	200	8	2.57113	477	187	455	202	26.6271
1	2	100	4	2.59195	495	482	475	461	29
1	2	300	4	1.81562	772	534	776	549	15.5242
1	2	100	8	4.54168	546	478	593	431	66.468
1	2	100	2	3.83681	435	320	446	331	15.5563
1	2	300	4	5.26735	409	666	377	705	50.448
1	2	100	1	1.84414	448	307	443	313	7.81025
1	2	100	2	1.87585	529	482	537	466	17.8885
1	2	100	0.5	3.1613	448	461	456	469	11.3137
1	2	300	8	2.83658	662	124	657	153	29.4279
1	2	200	4	3.7701	383	537	381	527	10.198
1	2	300	0.5	1.76393	615	102	618	69	33.1361
1	2	100	4	2.91247	546	478	560	451	30.4138
1	2	200	8	3.2498	444	196	444	194	2
1	2	200	0.5	1.72756	665	255	672	236	20.2485
1	2	200	4	2.48051	477	187	457	174	23.8537
1	2	200	2	3.27402	444	572	439	555	17.72
1	2	200	1	2.57482	665	255	643	264	23.7697
1	2	100	0.5	1.07388	546	290	536	284	11.6619
1	2	300	1	1.39055	319	154	289	148	30.5941
1	2	300	1	1.92649	662	124	666	135	11.7047
1	2	200	8	2.68274	444	572	449	602	30.4138
1	2	300	1	2.51491	772	234	750	230	22.3607
1	2	200	1	1.26796	612	211	611	220	9.05539
1	2	300	2	2.3649	319	154	271	149	48.2597
1	2	100	0.5	1.54076	576	461	578	454	7.28011
1	3	300	0.5	1.56943	282	191	265	172	25.4951
1	3	100	8	2.32793	610	401	603	405	8.06226
1	3	100	2	2.00079	529	482	542	479	13.3417
1	3	200	2	1.50655	641	231	638	232	3.16228
1	3	300	8	3.08454	217	436	211	514	78.2304
1	3	200	1	2.69211	339	484	327	526	43.6807
1	3	100	1	1.09514	435	320	438	319	3.16228
1	3	300	8	3.35397	217	436	183	487	61.2944
1	3	200	4	2.277	383	537	355	532	28.4429
1	3	200	2	3.65551	685	484	683	472	12.1655
1	3	200	0.5	1.74121	412	211	442	194	34.4819
1	3	200	4	2.57908	700	452	693	453	7.07107
1	3	300	4	3.75776	807	436	814	436	7
1	3	100	8	3.97618	418	350	429	357	13.0384
1	3	100	4	2.2421	599	434	601	417	17.1172
1	3	100	2	1.72167	448	307	448	329	22
1	3	200	8	2.53429	324	452	301	484	39.4081
1	3	200	8	1.37592	315	349	309	347	6.32456
1	3	100	1	2.33117	448	461	440	466	9.43398
1	3	300	1	1.90946	794	281	768	279	26.0768
1	3	100	2	2.88572	478	290	483	287	5.83095
1	3	300	4	2.93488	772	234	796	229	24.5153
1	3	200	0.5	2.98252	383	537	403	548	22.8254
1	3	300	4	3.34429	742	191	726	185	17.088
1	3	300	0.5	1.46387	217	436	222	457	21.587
1	3	200	1	2.33547	709	419	688	410	22.8473
1	3	300	1	2.44198	230	281	204	265	30.5287
1	3	100	2	2.44823	495	482	489	499	18.0278
1	3	100	0.5	1.74342	546	478	548	463	15.1327
1	3	300	0.5	2.71055	252	534	254	570	36.0555
1	4	300	8	3.03716	217	332	229	351	22.4722
1	4	300	8	2.76365	807	332	795	330	12.1655
1	4	100	8	2.97881	562	471	545	437	38.0132
1	4	200	0.5	2.59194	324	316	303	308	22.4722
1	4	200	4	2.70124	547	187	548	206	19.0263
1	4	100	1	2.32283	529	482	539	476	11.6619
1	4	100	8	1.52628	478	290	493	308	23.4307
1	4	300	0.5	2.06942	807	436	819	447	16.2788
1	4	200	2	2.53225	444	572	462	564	19.6977
1	4	200	1	2.94064	665	513	656	527	16.6433
1	4	300	4	2.52161	217	436	255	476	55.1725
1	4	100	8	4.6231	418	418	444	433	30.0167
1	4	100	0.5	1.08357	478	290	461	299	19.2354
1	4	200	1	2.32461	383	231	385	226	5.38516
1	4	100	2	2.71467	589	448	593	441	8.06226
1	4	100	2	1.95689	562	297	573	303	12.53
1	4	200	1	2.84543	641	231	645	246	15.5242
1	4	300	0.5	2.17841	564	679	593	700	35.805
1	4	200	1	3.64567	665	513	647	526	22.2036
1	4	100	0.5	2.34835	495	482	508	476	14.3178
1	4	300	4	2.38463	217	436	231	503	68.4471
1	4	300	2	2.16327	564	89	581	110	27.0185
1	4	200	4	3.12975	547	187	564	168	25.4951
1	4	300	4	2.59495	772	234	739	219	36.2491
1	4	300	0.5	2.65094	742	577	735	609	32.7567
1	4	200	1	2.51097	412	211	397	215	15.5242
1	4	200	8	2.97808	359	513	360	518	5.09902
1	4	100	2	1.50719	425	334	399	340	26.6833
1	4	100	2	2.20325	462	471	474	461	15.6205
1	4	300	4	2.46288	230	487	197	540	62.434
1	5	100	8	1.44989	414	401	406	418	18.7883
1	5	300	1	3.07824	742	191	727	216	29.1548
1	5	200	2	2.17026	641	537	651	544	12.2066
1	5	300	8	2.52872	362	124	339	116	24.3516
1	5	200	0.5	1.65294	547	581	544	594	13.3417
1	5	100	4	3.1671	546	478	541	471	8.60233
1	5	100	0.5	0.871801	435	320	427	310	12.8062
1	5	300	8	2.40391	615	102	625	107	11.1803
1	5	200	2	2.25534	339	484	355	486	16.1245
1	5	300	1	2.00239	217	332	221	332	4
1	5	300	8	1.83709	252	534	252	535	1
1	5	200	1	2.06156	444	196	431	212	20.6155
1	5	200	0.5	1.7749	444	196	438	194	6.32456
1	5	100	8	1.85807	589	448	558	440	32.0156
1	5	100	1	4.51354	478	290	466	307	20.8087
1	5	100	4	1.73846	462	297	453	288	12.7279
1	5	200	1	2.03814	324	452	327	458	6.7082
1	5	200	4	1.99563	700	452	703	456	5
1	5	300	8	3.12187	794	487	805	531	45.3542
1	5	300	1	2.29516	615	666	628	653	18.3848
1	5	100	4	2.49433	495	482	496	454	28.0179
1	5	300	0.5	3.90849	319	614	332	618	13.6015
1	5	300	2	2.26212	564	679	557	692	14.7648
1	5	200	0.5	3.63859	700	316	660	334	43.8634
1	5	100	4	1.69365	610	401	597	419	22.2036
1	5	200	4	3.34671	359	513	362	529	16.2788
1	5	100	2	2.03975	576	307	571	299	9.43398
1	5	300	2	2.38497	772	534	711	540	61.2944
1	5	200	0.5	1.99611	339	284	342	294	10.4403
1	5	100	2	2.78741	462	297	462	301	4
1	6	100	0.5	8.30784	435	448	486	353	107.824
1	6	200	1	1.49807	641	231	634	251	21.1896
1	6	100	0.5	2.78568	606	418	594	420	12.1655
1	6	300	8	2.58752	705	154	670	189	49.4975
1	6	300	1	1.84191	772	234	763	220	16.6433
1	6	100	8	3.76968	589	448	586	426	22.2036
1	6	200	8	3.79203	477	187	445	197	33.5261
1	6	100	4	2.30988	414	401	450	406	36.3456
1	6	200	2	4.0566	641	537	638	522	15.2971
1	6	200	4	2.74818	477	187	463	201	19.799
1	6	100	4	1.32859	425	334	419	315	19.9249
1	6	200	2	3.7643	477	581	487	542	40.2616
1	6	200	0.5	2.49268	641	537	633	531	10
1	6	200	4	2.30295	612	557	631	551	19.9249
1	6	100	1	1.33153	606	350	587	341	21.0238
1	6	300	2	2.7027	217	436	264	464	54.7083
1	6	200	2	2.51404	324	452	339	454	15.1327
1	6	300	0.5	1.83957	217	436	224	432	8.06226
1	6	100	2	1.69513	414	401	411	404	4.24264
1	6	300	8	2.45887	362	644	354	664	21.5407
1	6	100	1	2.24331	529	286	551	301	26.6271
1	6	100	4	1.81833	418	418	420	426	8.24621
1	6	200	0.5	2.08408	477	581	478	571	10.0499
1	6	300	1	2.68426	564	679	569	685	7.81025
1	6	100	1	2.07558	562	297	555	311	15.6525
1	6	200	4	3.3039	477	581	505	594	30.8707
1	6	300	8	3.16209	319	154	300	193	43.382
1	6	300	0.5	1.53309	564	89	546	101	21.6333
1	6	300	8	2.9984	230	281	189	266	43.6578
1	6	300	2	1.61673	705	154	686	171	25.4951
2	1	100	1	10.2243	435	320	505	392	100.419
2	1	300	1	0.929048	807	332	810	291	41.1096
2	1	100	2	1.34755	576	307	564	322	19.2094
2	1	200	2	1.92771	315	419	320	439	20.6155
2	1	100	2	1.81009	435	320	416	352	37.2156
2	1	300	8	1.8175	807	436	824	445	19.2354
2	1	100	2	2.03973	606	350	606	353	3
2	1	100	0.5	1.38607	606	418	631	425	25.9615
2	1	300	8	1.65665	409	666	469	681	61.8466
2	1	300	8	4.01109	705	154	771	99	85.9127
2	1	100	4	1.33108	478	478	508	481	30.1496
2	1	200	8	1.98079	324	452	350	504	58.1378
2	1	200	2	1.85568	709	419	708	419	1
2	1	100	4	1.73105	529	286	534	303	17.72
2	1	300	0.5	2.29327	742	577	760	563	22.8035
2	1	300	1	1.37017	564	89	558	96	9.21954
2	1	300	0.5	1.77047	252	234	223	228	29.6142
2	1	200	1	1.46609	612	557	641	520	47.0106
2	1	100	0.5	1.22755	495	482	503	482	8
2	1	100	4	1.57545	606	418	601	419	5.09902
2	1	200	4	1.70701	412	557	406	562	7.81025
2	1	200	0.5	1.65174	665	513	662	517	5
2	1	200	8	2.08853	324	316	345	328	24.1868
2	1	200	2	1.36778	700	452	709	455	9.48683
2	1	300	1	1.57463	282	191	268	173	22.8035
2	1	100	0.5	1.33071	414	367	418	366	4.12311
2	1	200	4	1.61309	339	284	344	297	13.9284
2	1	300	1	1.29379	252	534	251	558	24.0208
2	1	200	4	1.73747	641	231	661	227	20.3961
2	1	300	8	1.78604	460	679	453	645	34.7131
2	2	100	0.5	1.2696	462	297	451	306	14.2127
2	2	200	8	1.5386	580	572	625	614	61.5549
2	2	200	0.5	1.61449	665	255	673	245	12.8062
2	2	300	2	1.75792	807	332	845	330	38.0526
2	2	200	4	2.17542	547	581	590	584	43.1045
2	2	100	1	1.57744	606	418	629	414	23.3452
2	2	200	4	1.8915	359	513	401	504	42.9535
2	2	200	1	1.21995	359	513	329	540	40.3609
2	2	300	2	1.60398	230	281	224	303	22.8035
2	2	200	2	2.02382	547	581	549	561	20.0998
2	2	100	1	1.56161	562	471	576	462	16.6433
2	2	100	1	1.62203	610	401	616	403	6.32456
2	2	300	4	3.03227	807	332	785	296	42.19
2	2	300	0.5	1.48475	362	644	363	634	10.0499
2	2	300	4	1.88645	564	89	581	79	19.7231
2	2	100	4	1.64666	606	418	624	401	24.7588
2	2	300	8	1.76103	742	577	816	490	114.215
2	2	100	8	2.33974	448	307	447	329	22.0227
2	2	300	0.5	1.7393	705	614	715	597	19.7231
2	2	300	4	1.6775	460	679	487	651	38.8973
2	2	200	2	1.51257	685	284	704	270	23.6008
2	2	300	2	1.56239	252	534	260	584	50.636
2	2	300	8	1.9164	772	234	764	195	39.8121
2	2	100	1	1.21099	610	367	617	360	9.89949
2	2	100	0.5	1.10625	414	367	432	358	20.1246
2	2	100	0.5	3.21335	589	448	497	366	123.24
2	2	200	8	1.46018	709	349	721	323	28.6356
2	2	100	1	1.75603	495	286	482	296	16.4012
2	2	200	8	1.47783	612	211	649	201	38.3275
2	2	200	2	1.67532	641	231	632	204	28.4605
2	3	300	0.5	1.02212	564	89	563	77	12.0416
2	3	200	0.5	0.842209	383	537	421	534	38.1182
2	3	300	4	1.17781	319	614	339	629	25
2	3	200	0.5	1.17523	359	513	345	525	18.4391
2	3	200	4	1.64862	547	581	551	576	6.40312
2	3	300	1	1.45314	564	679	593	664	32.6497
2	3	100	8	1.31371	414	367	442	409	50.4777
2	3	300	8	1.81039	807	332	849	335	42.107
2	3	200	4	1.8967	412	557	432	544	23.8537
2	3	300	1	1.61325	772	234	820	210	53.6656
2	3	200	0.5	1.78333	383	537	396	549	17.6918
2	3	200	8	1.90599	685	284	738	281	53.0848
2	3	100	8	1.82724	610	367	613	354	13.3417
2	3	100	0.5	2.07091	562	297	569	302	8.60233
2	3	200	2	1.62796	685	284	700	277	16.5529
2	3	200	1	4.63909	709	419	752	399	47.4236
2	3	100	1	1.4394	414	401	419	420	19.6469
2	3	300	2	1.79892	662	124	665	133	9.48683
2	3	200	2	1.38624	700	316	719	285	36.3593
2	3	300	4	1.80147	319	614	347	593	35
2	3	100	1	1.63558	606	350	592	354	14.5602
2	3	100	2	1.22858	562	471	577	451	25
2	3	100	2	1.38175	495	482	498	471	11.4018
2	3	100	4	1.8002	599	334	621	330	22.3607
2	3	100	0.5	1.70932	529	286	521	285	8.06226
2	3	200	2	1.68736	383	537	415	536	32.0156
2	3	300	4	1.53469	282	191	207	157	82.3468
2	3	300	8	4.16806	564	679	617	686	53.4603
2	3	100	1	1.77538	610	401	613	395	6.7082
2	3	300	8	7.56997	282	191	393	257	129.139
2	4	100	4	1.41675	462	471	470	469	8.24621
2	4	200	8	2.66472	700	316	730	285	43.1393
2	4	300	8	1.82437	615	102	651	111	37.108
2	4	300	8	3.45109	807	436	843	479	56.0803
2	4	100	1	1.34449	495	286	508	276	16.4012
2	4	100	2	1.50282	576	461	581	452	10.2956
2	4	200	4	1.07328	641	231	653	211	23.3238
2	4	300	8	1.99836	409	102	335	98	74.108
2	4	300	0.5	1.82078	615	666	627	586	80.895
2	4	100	0.5	1.81958	562	297	566	310	13.6015
2	4	200	1	1.50856	641	537	663	547	24.1661
2	4	200	2	1.61176	685	484	709	499	28.3019
2	4	200	2	1.7149	580	196	603	197	23.0217
2	4	300	2	1.67709	362	644	381	659	24.2074
2	4	100	2	1.28042	435	320	435	350	30
2	4	100	1	1.74991	414	367	419	384	17.72
2	4	200	1	11.0428	383	231	379	277	46.1736
2	4	100	4	1.02737	576	307	578	318	11.1803
2	4	300	1	1.47851	409	666	423	641	28.6531
2	4	200	2	1.12281	383	537	409	553	30.5287
2	4	300	0.5	1.27454	409	102	398	122	22.8254
2	4	300	4	1.86149	705	614	662	586	51.3128
2	4	100	0.5	1.19975	562	471	594	465	32.5576
2	4	100	0.5	3.06899	576	461	507	387	101.178
2	4	200	4	1.6501	685	284	727	280	42.19
2	4	200	0.5	1.59864	685	284	705	261	30.4795
2	4	300	8	1.8013	319	154	232	129	90.5207
2	4	100	4	2.02022	418	350	396	343	23.0868
2	4	300	8	1.62719	282	577	318	630	64.0703
2	4	200	1	1.57504	477	187	472	186	5.09902
2	5	200	0.5	1.129	359	513	366	521	10.6301
2	5	100	0.5	1.30692	478	478	487	469	12.7279
2	5	300	0.5	0.94999	362	124	335	129	27.4591
2	5	200	4	1.47608	383	537	416	485	61.5873
2	5	300	2	1.57614	460	679	473	658	24.6982
2	5	200	8	1.69849	612	211	631	200	21.9545
2	5	100	0.5	1.48923	529	482	538	490	12.0416
2	5	300	8	1.74684	230	487	245	560	74.5252
2	5	300	2	1.19138	772	534	778	555	21.8403
2	5	300	8	2.8859	230	281	606	383	389.59
2	5	200	8	1.4867	315	419	307	507	88.3629
2	5	100	2	1.32053	610	401	621	410	14.2127
2	5	200	4	1.50006	324	316	317	356	40.6079
2	5	100	1	1.49795	478	478	465	478	13
2	5	300	2	1.48596	794	487	810	484	16.2788
2	5	100	1	0.878599	546	478	558	472	13.4164
2	5	300	1	2.412	409	102	396	87	19.8494
2	5	200	4	1.53848	641	537	668	512	36.7967
2	5	300	1	1.03751	282	191	254	202	30.0832
2	5	200	1	0.877569	665	255	692	234	34.2053
2	5	100	0.5	2.26815	576	461	489	387	114.215
2	5	100	4	0.699149	435	320	415	338	26.9072
2	5	200	2	1.64674	685	484	684	438	46.0109
2	5	100	1	1.21246	462	471	464	483	12.1655
2	5	100	4	1.18646	599	434	608	424	13.4536
2	5	200	0.5	1.54758	709	419	760	409	51.9711
2	5	200	4	2.33718	700	316	764	288	69.857
2	5	300	8	1.36155	217	332	161	378	72.4707
2	5	300	8	2.16466	319	154	513	363	285.161
2	5	100	2	1.22716	599	434	602	453	19.2354
2	6	200	8	1.49312	477	187	475	147	40.05
2	6	300	2	1.64126	460	89	455	61	28.4429
2	6	100	1	2.36921	478	290	484	269	21.8403
2	6	100	2	1.11023	610	401	636	392	27.5136
2	6	200	4	1.09527	477	581	507	568	32.6956
2	6	100	8	1.09296	576	461	566	485	26
2	6	200	4	2.15269	383	537	424	513	47.5079
2	6	100	1	1.04272	462	471	479	481	19.7231
2	6	100	0.5	1.50084	448	461	443	478	17.72
2	6	100	0.5	1.74723	448	461	443	467	7.81025
2	6	300	2	2.38617	362	124	502	376	288.278
2	6	200	2	1.31173	665	513	693	516	28.1603
2	6	200	8	2.32056	412	211	370	189	47.4131
2	6	300	1	1.98231	807	332	832	304	37.5366
2	6	100	0.5	2.66805	418	350	397	338	24.1868
2	6	300	1	1.07455	230	487	224	539	52.345
2	6	300	8	1.27965	742	577	806	633	85.0412
2	6	200	2	1.86029	477	581	493	571	18.868
2	6	300	0.5	1.14242	362	644	376	639	14.8661
2	6	100	1	1.39659	448	307	442	324	18.0278
2	6	300	4	1.28963	460	679	535	653	79.3788
2	6	200	0.5	2.66024	700	316	726	297	32.2025
2	6	200	1	1.89257	700	316	731	286	43.1393
2	6	200	2	1.16163	641	537	685	505	54.4059
2	6	300	8	1.18737	662	644	757	652	95.3362
2	6	100	4	1.5548	462	471	489	500	39.6232
2	6	200	0.5	1.43927	383	537	375	541	8.94427
2	6	100	4	1.61372	414	401	411	419	18.2483
2	6	300	8	1.59803	794	281	793	327	46.0109
2	6	300	4	1.45697	409	102	372	126	44.1022
3	1	100	0.5	6.436	562	471	540	448	31.8277
3	1	100	2	2.8583	435	448	433	443	5.38516
3	1	300	4	1.89751	807	436	709	470	103.73
3	1	200	2	3.5905	444	196	410	215	38.9487
3	1	100	8	2.80532	610	367	574	357	37.3631
3	1	200	8	5.84068	477	187	468	208	22.8473
3	1	100	4	3.79918	606	418	583	415	23.1948
3	1	200	2	2.8499	315	349	354	352	39.1152
3	1	300	0.5	3.10539	409	102	388	97	21.587
3	1	200	1	2.78612	709	419	668	391	49.6488
3	1	100	1	3.95618	610	401	602	397	8.94427
3	1	300	0.5	3.63228	460	89	466	86	6.7082
3	1	100	8	3.80338	435	448	421	441	15.6525
3	1	200	2	10.3267	412	557	404	581	25.2982
3	1	300	2	7.63566	460	679	439	632	51.4782
3	1	200	1	3.3616	359	255	368	254	9.05539
3	1	100	1	1.43566	495	482	490	460	22.561
3	1	100	8	3.53106	418	418	410	434	17.8885
3	1	200	0.5	7.79096	580	572	326	146	495.976
3	1	300	4	2.79856	282	191	301	177	23.6008
3	1	200	0.5	2.41798	315	349	363	330	51.6236
3	1	300	2	3.82534	362	124	365	142	18.2483
3	1	300	1	2.04578	564	89	552	93	12.6491
3	1	200	0.5	1.42637	685	284	647	275	39.0512
3	1	100	4	3.9975	435	320	429	307	14.3178
3	1	300	8	3.39668	460	679	421	674	39.3192
3	1	300	4	2.94117	794	487	688	523	111.946
3	1	300	4	2.30424	564	679	652	661	89.822
3	1	100	1	4.84204	414	367	574	557	248.395
3	1	200	8	4.93108	641	231	621	265	39.4462
3	2	200	0.5	2.09684	412	211	403	219	12.0416
3	2	300	2	5.13388	252	534	246	537	6.7082
3	2	300	0.5	2.65835	807	332	778	320	31.3847
3	2	100	2	3.53674	425	334	431	327	9.21954
3	2	300	1	3.4904	230	281	212	293	21.6333
3	2	200	2	7.10608	359	513	336	481	39.4081
3	2	200	1	4.07497	359	255	358	274	19.0263
3	2	100	4	3.33669	529	286	517	279	13.8924
3	2	200	4	3.48204	324	316	367	310	43.4166
3	2	100	1	3.12137	529	482	533	442	40.1995
3	2	200	0.5	4.49646	709	419	648	415	61.131
3	2	100	1	2.71737	546	290	552	301	12.53
3	2	200	4	4.20326	641	537	642	523	14.0357
3	2	100	1	2.47746	425	334	437	323	16.2788
3	2	300	8	4.7079	705	614	688	587	31.9061
3	2	200	8	4.27664	477	581	464	591	16.4012
3	2	100	4	2.66314	418	350	412	359	10.8167
3	2	100	2	1.60004	462	297	455	295	7.28011
3	2	300	2	2.96145	282	577	309	592	30.8869
3	2	200	1	1.86086	612	211	593	238	33.0151
3	2	200	8	1.85269	444	196	439	187	10.2956
3	2	300	0.5	3.92973	742	577	742	607	30
3	2	300	4	2.4264	794	281	762	271	33.5261
3	2	300	2	2.40609	217	332	229	306	28.6356
3	2	100	8	1.76267	462	297	435	290	27.8927
3	2	300	4	2.42375	362	124	342	131	21.1896
3	2	100	0.5	2.30842	462	471	467	444	27.4591
3	2	100	8	2.12752	610	401	602	415	16.1245
3	2	300	8	2.26318	319	154	323	167	13.6015
3	2	200	0.5	4.53807	580	196	556	222	35.3836
3	3	300	1	2.43411	615	666	594	667	21.0238
3	3	300	2	1.89113	282	577	303	607	36.6197
3	3	300	8	2.38632	807	436	779	471	44.8219
3	3	200	4	1.15253	641	537	653	539	12.1655
3	3	300	8	2.78629	772	534	747	575	48.0208
3	3	300	2	4.17862	409	666	382	697	41.1096
3	3	100	2	2.42758	599	334	596	337	4.24264
3	3	200	4	3.03951	315	349	334	330	26.8701
3	3	100	0.5	2.3228	546	290	558	282	14.4222
3	3	100	4	2.0153	599	334	588	340	12.53
3	3	200	2	2.60528	665	513	656	522	12.7279
3	3	200	1	2.04079	547	581	578	565	34.8855
3	3	100	8	1.6472	546	290	543	289	3.16228
3	3	200	2	1.86835	412	211	410	225	14.1421
3	3	100	0.5	1.90218	546	478	557	456	24.5967
3	3	100	8	1.33793	529	286	537	286	8
3	3	300	4	1.75546	362	644	371	642	9.21954
3	3	100	0.5	2.82365	418	418	442	418	24
3	3	300	4	2.29164	409	102	396	127	28.178
3	3	100	8	1.94936	414	401	400	430	32.2025
3	3	300	1	2.83357	217	436	230	445	15.8114
3	3	300	1	2.77798	662	124	659	153	29.1548
3	3	200	0.5	1.34325	444	196	442	210	14.1421
3	3	200	1	1.85312	324	316	350	325	27.5136
3	3	200	2	1.97703	547	581	565	580	18.0278
3	3	200	0.5	2.34151	685	284	674	289	12.083
3	3	300	0.5	2.84389	615	666	616	673	7.07107
3	3	200	8	1.93011	315	419	318	412	7.61577
3	3	100	4	1.9261	418	418	407	432	17.8045
3	3	100	1	1.60251	546	290	550	300	10.7703
3	4	200	4	1.68001	339	484	315	493	25.632
3	4	200	2	1.39514	612	211	600	216	13
3	4	300	8	1.84271	230	487	211	478	21.0238
3	4	300	0.5	2.47618	807	332	780	320	29.5466
3	4	300	1	1.67184	564	679	560	677	4.47214
3	4	200	4	1.87535	412	211	378	223	36.0555
3	4	200	1	1.98375	709	419	707	423	4.47214
3	4	300	8	1.78611	230	487	257	472	30.8869
3	4	200	0.5	1.80638	412	211	401	225	17.8045
3	4	200	4	1.59317	383	537	379	517	20.3961
3	4	300	0.5	2.81884	362	124	344	143	26.1725
3	4	100	0.5	1.18878	606	350	598	340	12.8062
3	4	100	8	1.95608	610	367	589	355	24.1868
3	4	200	2	1.67599	315	349	336	353	21.3776
3	4	300	1	1.96992	807	436	763	462	51.1077
3	4	100	1	1.32818	529	286	535	294	10
3	4	300	8	2.754	662	644	644	673	34.1321
3	4	100	2	1.1219	435	320	424	334	17.8045
3	4	200	2	1.96951	612	211	616	225	14.5602
3	4	300	4	2.54162	705	154	694	190	37.6431
3	4	100	4	1.86069	589	320	593	307	13.6015
3	4	100	1	1.75758	414	401	418	402	4.12311
3	4	100	0.5	1.21666	478	290	481	286	5
3	4	200	8	3.55246	444	572	415	583	31.0161
3	4	100	4	2.22459	610	367	606	332	35.2278
3	4	300	0.5	2.46179	807	436	765	445	42.9535
3	4	100	8	1.46131	462	471	412	460	51.1957
3	4	200	2	2.59092	685	484	674	485	11.0454
3	4	300	1	2.12491	662	644	666	666	22.3607
3	4	100	2	1.4818	529	286	523	293	9.21954
3	5	100	0.5	1.61629	599	434	590	430	9.84886
3	5	200	4	1.96741	547	581	554	548	33.7343
3	5	200	2	2.27618	359	513	354	528	15.8114
3	5	200	0.5	2.08281	580	572	576	577	6.40312
3	5	300	4	1.34035	794	487	751	495	43.7379
3	5	300	1	1.92891	742	191	742	214	23
3	5	200	4	2.32203	477	187	491	202	20.5183
3	5	200	0.5	2.46541	324	316	359	325	36.1386
3	5	100	0.5	2.80426	562	471	575	480	15.8114
3	5	200	1	1.06278	359	255	357	255	2
3	5	300	8	2.37593	615	102	609	150	48.3735
3	5	300	1	2.01687	252	234	257	238	6.40312
3	5	200	8	2.60166	324	316	335	319	11.4018
3	5	300	2	2.98101	409	666	378	666	31
3	5	100	1	1.19896	478	290	470	303	15.2643
3	5	300	2	1.95216	362	124	364	151	27.074
3	5	300	1	2.31479	772	534	781	554	21.9317
3	5	100	0.5	1.10194	462	297	454	307	12.8062
3	5	100	2	2.87664	606	350	588	352	18.1108
3	5	100	1	1.39859	546	478	542	452	26.3059
3	5	200	8	2.46601	580	196	579	198	2.23607
3	5	300	8	1.874	807	436	752	445	55.7315
3	5	100	4	2.12536	418	418	412	425	9.21954
3	5	200	0.5	1.31674	412	211	422	231	22.3607
3	5	200	8	1.64265	477	187	466	188	11.0454
3	5	300	8	1.6587	252	234	254	226	8.24621
3	5	100	2	2.12189	495	482	485	453	30.6757
3	5	100	2	2.1107	576	461	576	459	2
3	5	100	4	3.1062	418	418	406	430	16.9706
3	5	300	4	1.83355	742	191	709	241	59.9083
3	6	100	2	2.0649	414	401	428	405	14.5602
3	6	300	1	1.76148	794	487	769	504	30.2324
3	6	100	1	2.01123	589	448	576	439	15.8114
3	6	100	0.5	1.62895	448	307	417	292	34.4384
3	6	200	1	2.00037	685	284	655	288	30.2655
3	6	300	2	1.6681	252	534	241	546	16.2788
3	6	300	4	2.13955	615	102	624	126	25.632
3	6	100	4	1.38618	418	350	430	350	12
3	6	300	1	2.12896	794	281	785	295	16.6433
3	6	300	8	1.94504	794	281	811	285	17.4642
3	6	300	0.5	2.16808	564	679	554	703	26
3	6	100	4	2.62227	495	286	477	294	19.6977
3	6	300	8	2.10586	230	487	225	515	28.4429
3	6	200	1	1.82801	612	211	619	242	31.7805
3	6	300	2	1.79881	230	487	213	507	26.2488
3	6	200	0.5	3.57931	412	557	408	555	4.47214
3	6	200	0.5	2.79321	665	255	650	291	39
3	6	200	2	2.03077	547	187	543	217	30.2655
3	6	200	8	1.41052	477	187	469	181	10
3	6	300	4	2.20908	662	124	662	138	14
3	6	100	8	1.88377	610	367	597	360	14.7648
3	6	200	8	2.45153	641	537	615	531	26.6833
3	6	100	4	1.68748	546	290	544	303	13.1529
3	6	100	2	1.5198	562	471	560	469	2.82843
3	6	200	8	1.65351	324	452	339	471	24.2074
3	6	100	2	1.85118	414	367	401	364	13.3417
3	6	300	0.5	2.53702	615	666	607	651	17
3	6	100	1	1.60839	562	297	567	321	24.5153
3	6	200	0.5	2.67424	383	537	378	573	36.3456
3	6	200	4	2.16805	641	537	628	535	13.1529
4	1	100	1	9.45659	425	434	465	442	40.7922
4	1	300	1	5.50966	230	281	299	298	71.0634
4	1	100	4	4.7985	606	418	607	469	51.0098
4	1	200	4	3.02532	547	581	534	622	43.0116
4	1	300	0.5	2.74412	772	234	754	271	41.1461
4	1	300	8	3.05258	662	124	750	222	131.712
4	1	100	2	4.19205	478	290	486	329	39.8121
4	1	100	1	5.92856	425	434	417	433	8.06226
4	1	300	4	5.00793	362	644	387	687	49.7393
4	1	200	4	4.73961	612	211	681	350	155.184
4	1	200	1	5.93771	339	484	316	517	40.2244
4	1	100	8	7.60192	529	286	585	318	64.4981
4	1	200	2	5.01243	339	284	330	291	11.4018
4	1	100	8	2.62719	576	461	584	496	35.9026
4	1	100	8	3.47935	546	478	526	520	46.5188
4	1	300	1	4.97908	409	102	418	115	15.8114
4	1	200	0.5	4.53503	383	537	374	588	51.788
4	1	100	0.5	6.20285	462	471	410	505	62.1289
4	1	200	2	3.41434	315	419	304	456	38.6005
4	1	300	8	4.13206	362	124	285	145	79.8123
4	1	200	8	5.67728	412	557	357	550	55.4437
4	1	200	2	4.35346	315	349	308	359	12.2066
4	1	100	0.5	4.06235	529	286	531	318	32.0624
4	1	300	0.5	4.71275	409	666	368	703	55.2268
4	1	300	1	5.113	460	679	449	709	31.9531
4	1	200	2	3.72917	383	231	386	218	13.3417
4	1	100	4	3.17066	478	478	459	509	36.3593
4	1	200	2	2.8413	580	572	606	595	34.7131
4	1	300	0.5	4.76379	217	332	252	300	47.4236
4	1	300	4	3.24056	460	679	418	682	42.107
4	2	100	0.5	2.03136	435	448	424	445	11.4018
4	2	100	4	4.0842	418	418	400	441	29.2062
4	2	100	2	2.03544	448	461	430	466	18.6815
4	2	100	8	3.85863	414	401	396	446	48.4665
4	2	300	1	5.83471	460	679	483	721	47.8853
4	2	100	2	4.05183	589	448	598	502	54.7449
4	2	200	0.5	5.03265	359	513	367	525	14.4222
4	2	300	2	5.03535	705	154	681	197	49.2443
4	2	100	8	2.57907	529	482	580	513	59.6825
4	2	100	1	3.83719	495	482	486	529	47.8539
4	2	200	1	3.88487	641	537	674	615	84.6936
4	2	200	4	3.61317	315	419	314	511	92.0054
4	2	300	8	2.66201	794	487	812	545	60.7289
4	2	300	8	2.3165	772	534	752	528	20.8806
4	2	300	0.5	3.93128	460	89	450	70	21.4709
4	2	200	4	5.97255	580	196	626	140	72.4707
4	2	200	1	4.38678	547	581	564	645	66.2193
4	2	300	1	6.58645	409	102	368	104	41.0488
4	2	200	0.5	3.97791	612	211	642	208	30.1496
4	2	200	2	3.71001	444	572	415	597	38.2884
4	2	300	4	2.89444	742	191	748	200	10.8167
4	2	200	4	4.30029	477	581	475	621	40.05
4	2	100	0.5	6.36113	576	461	603	483	34.8281
4	2	100	8	3.09093	576	307	643	336	73.0068
4	2	300	2	5.60276	564	89	606	67	47.4131
4	2	200	0.5	5.07271	412	557	361	577	54.7814
4	2	300	1	3.54793	807	332	844	315	40.7185
4	2	300	8	4.29072	705	614	764	620	59.3043
4	2	100	2	6.20986	495	482	434	532	78.8733
4	2	200	4	3.15346	324	452	307	499	49.98
4	3	200	1	2.88862	324	452	284	480	48.8262
4	3	100	0.5	2.53973	448	461	448	463	2
4	3	300	1	4.38477	252	534	258	548	15.2315
4	3	300	8	1.36975	705	614	777	660	85.44
4	3	300	2	2.90368	807	332	817	407	75.6637
4	3	100	8	3.49333	546	478	656	501	112.379
4	3	100	2	3.08882	606	418	677	447	76.6942
4	3	200	4	3.1614	315	349	335	306	47.4236
4	3	100	2	2.85138	610	401	674	396	64.195
4	3	200	4	2.99222	665	513	734	536	72.7324
4	3	100	8	2.63865	495	482	519	555	76.844
4	3	200	1	3.83996	547	187	567	139	52
4	3	300	0.5	2.22288	705	154	745	136	43.8634
4	3	100	0.5	3.64597	425	334	417	338	8.94427
4	3	100	2	4.52944	529	482	557	495	30.8707
4	3	200	4	2.47581	665	255	708	274	47.0106
4	3	200	8	3.07899	324	316	325	274	42.0119
4	3	300	8	3.57144	319	154	266	151	53.0848
4	3	300	2	2.02498	742	191	766	178	27.2947
4	3	200	1	4.5256	359	255	361	194	61.0328
4	3	200	0.5	4.42792	339	284	310	244	49.4065
4	3	300	4	4.61435	705	154	736	130	39.2046
4	3	300	1	7.54267	615	102	659	114	45.607
4	3	300	0.5	5.81377	662	124	728	97	71.3092
4	3	100	1	3.99535	448	307	430	263	47.5395
4	3	100	4	2.95394	462	471	427	489	39.3573
4	3	100	2	1.80391	478	478	460	498	26.9072
4	3	200	4	2.83073	315	419	305	478	59.8415
4	3	200	0.5	5.08411	477	581	458	569	22.4722
4	3	300	8	2.33309	362	124	400	161	53.0377
4	4	100	2	2.23778	418	418	383	442	42.4382
4	4	200	1	4.42867	685	284	732	315	56.3028
4	4	100	0.5	3.82578	414	401	399	437	39
4	4	200	1	1.90253	477	581	476	597	16.0312
4	4	100	0.5	2.06043	462	471	441	495	31.8904
4	4	300	2	4.26231	794	487	841	548	77.0065
4	4	300	8	3.51717	772	234	889	326	148.839
4	4	300	8	5.28065	282	577	258	650	76.844
4	4	200	4	3.90651	612	557	681	628	99.0051
4	4	200	1	4.10722	580	196	547	502	307.774
4	4	200	4	2.29922	315	419	303	447	30.4631
4	4	200	0.5	4.25125	339	484	330	503	21.0238
4	4	300	8	5.83721	362	124	352	101	25.0799
4	4	300	8	3.19814	742	577	771	635	64.846
4	4	300	4	4.84876	362	644	376	684	42.3792
4	4	100	0.5	3.03877	495	286	494	285	1.41421
4	4	100	8	3.42076	562	471	617	492	58.8727
4	4	300	2	3.63575	742	577	783	638	73.4983
4	4	300	0.5	3.66319	319	154	515	525	419.591
4	4	100	1	2.35083	418	418	425	430	13.8924
4	4	200	8	2.71484	700	316	740	360	59.4643
4	4	100	1	2.89202	562	471	590	473	28.0713
4	4	200	4	3.03083	580	572	611	614	52.2015
4	4	300	1	3.11294	807	332	821	397	66.4906
4	4	300	4	3.13722	564	679	611	708	55.2268
4	4	100	0.5	1.68591	589	320	616	327	27.8927
4	4	100	2	2.43053	562	471	619	484	58.4637
4	4	200	2	1.81759	412	557	385	578	34.2053
4	4	100	4	3.50595	462	471	473	521	51.1957
4	4	200	2	4.16157	339	284	306	370	92.1141
4	5	200	4	3.91841	412	211	401	190	23.7065
4	5	300	2	3.90915	252	534	247	569	35.3553
4	5	200	0.5	2.78493	709	419	744	449	46.0977
4	5	200	8	2.50529	324	316	337	310	14.3178
4	5	100	4	3.54816	529	482	549	482	20
4	5	300	4	4.65694	230	281	207	332	55.9464
4	5	100	8	3.91261	529	482	547	476	18.9737
4	5	100	1	3.83222	435	448	440	459	12.083
4	5	200	1	4.68522	612	557	629	588	35.3553
4	5	300	1	8.23063	564	679	584	733	57.5847
4	5	300	0.5	6.56251	252	534	268	600	67.9117
4	5	300	1	3.01129	252	234	255	298	64.0703
4	5	100	0.5	5.86123	462	471	491	495	37.6431
4	5	100	2	3.84422	576	461	609	480	38.0789
4	5	200	0.5	3.34425	412	557	428	582	29.6816
4	5	100	0.5	4.10602	462	471	495	493	39.6611
4	5	100	4	3.26651	495	482	517	488	22.8035
4	5	300	8	3.35449	662	644	782	713	138.423
4	5	200	1	3.06119	359	255	363	271	16.4924
4	5	100	0.5	4.7992	435	320	442	342	23.0868
4	5	300	2	3.16213	319	154	281	146	38.833
4	5	100	2	2.58728	606	418	656	457	63.4114
4	5	200	4	5.55455	477	187	487	152	36.4005
4	5	200	4	3.43567	383	537	411	564	38.8973
4	5	300	8	3.41252	252	534	242	552	20.5913
4	5	100	8	1.87558	599	334	576	340	23.7697
4	5	300	8	2.48772	662	644	708	656	47.5395
4	5	200	2	1.90386	580	196	595	221	29.1548
4	5	200	2	3.4564	324	452	343	451	19.0263
4	5	300	1	2.6757	794	281	811	288	18.3848
4	6	200	4	2.46403	685	284	706	318	39.9625
4	6	100	0.5	2.05745	562	471	572	486	18.0278
4	6	300	2	3.08127	742	191	775	237	56.6127
4	6	100	0.5	3.23711	610	367	605	383	16.7631
4	6	300	8	3.57095	230	487	251	530	47.8539
4	6	100	8	3.31459	529	286	544	305	24.2074
4	6	300	4	2.33819	615	666	622	719	53.4603
4	6	200	1	2.42004	641	231	645	238	8.06226
4	6	200	2	3.51521	324	316	360	326	37.3631
4	6	100	4	2.03643	610	367	642	388	38.2753
4	6	100	2	2.69198	599	434	621	475	46.5296
4	6	100	0.5	2.89542	589	320	607	337	24.7588
4	6	300	1	2.13068	705	154	762	173	60.0833
4	6	200	1	1.98173	685	284	724	253	49.8197
4	6	300	1	1.83977	742	191	767	189	25.0799
4	6	200	8	3.76778	580	572	677	602	101.533
4	6	300	4	6.48482	362	124	759	416	492.821
4	6	200	1	2.35012	685	284	721	313	46.2277
4	6	300	4	2.25058	794	487	801	511	25
4	6	100	8	2.29417	418	350	369	343	49.4975
4	6	300	8	3.41319	409	102	393	126	28.8444
4	6	200	1	4.44995	547	187	561	207	24.4131
4	6	200	2	3.0944	324	452	355	459	31.7805
4	6	100	2	2.54648	414	367	424	351	18.868
4	6	100	2	4.10426	425	334	433	348	16.1245
4	6	100	4	2.3227	425	434	417	439	9.43398
4	6	300	8	3.76056	362	644	358	630	14.5602
4	6	200	0.5	1.57817	612	211	627	244	36.2491
4	6	200	0.5	2.0945	383	231	400	227	17.4642
4	6	300	0.5	3.17587	252	534	248	536	4.47214
5	1	100	0.5	2.38084	478	290	458	293	20.2237
5	1	100	0.5	2.28918	599	334	587	331	12.3693
5	1	100	8	2.95996	462	297	470	298	8.06226
5	1	100	4	1.44174	462	297	479	292	17.72
5	1	300	8	1.37062	772	534	780	563	30.0832
5	1	100	2	2.47956	576	461	577	461	1
5	1	100	0.5	1.44591	495	286	490	286	5
5	1	300	4	3.24321	319	154	304	142	19.2094
5	1	300	2	1.65879	564	679	601	722	56.7274
5	1	200	0.5	1.21138	665	255	642	289	41.0488
5	1	200	2	1.5158	383	537	418	529	35.9026
5	1	300	1	1.77754	409	102	385	75	36.1248
5	1	100	4	0.970433	418	350	419	354	4.12311
5	1	100	8	1.58681	425	334	429	351	17.4642
5	1	300	4	3.41524	319	614	370	612	51.0392
5	1	300	8	2.72743	615	666	631	691	29.6816
5	1	200	2	0.911606	709	419	679	461	51.614
5	1	100	2	1.96985	478	290	476	305	15.1327
5	1	200	1	1.37644	444	196	436	182	16.1245
5	1	200	1	3.76193	359	513	414	509	55.1453
5	1	300	1	1.98942	409	666	429	682	25.6125
5	1	200	0.5	1.57221	359	513	369	548	36.4005
5	1	100	8	0.915155	478	290	469	305	17.4929
5	1	200	4	1.88321	359	255	370	242	17.0294
5	1	200	2	2.61302	641	231	646	231	5
5	1	300	1	3.45916	794	281	804	277	10.7703
5	1	300	1	2.7637	662	124	667	118	7.81025
5	1	300	4	3.01914	409	102	424	101	15.0333
5	1	200	0.5	1.61845	665	513	653	528	19.2094
5	1	200	8	3.08272	339	484	406	485	67.0075
5	2	100	8	1.333	435	448	511	386	98.0816
5	2	200	1	1.73282	315	419	333	406	22.2036
5	2	300	0.5	2.0015	409	102	380	60	51.0392
5	2	300	2	2.013	705	614	743	641	46.6154
5	2	200	8	2.05827	612	557	641	576	34.6699
5	2	100	2	2.27458	562	297	588	306	27.5136
5	2	100	1	1.9522	610	367	624	360	15.6525
5	2	200	4	2.2503	612	557	628	558	16.0312
5	2	300	0.5	2.31934	362	644	403	667	47.0106
5	2	100	1	1.45986	599	434	610	439	12.083
5	2	200	0.5	1.83798	547	581	554	595	15.6525
5	2	100	1	1.58169	495	286	471	281	24.5153
5	2	300	4	2.27208	662	124	694	107	36.2353
5	2	100	2	1.76475	462	471	449	463	15.2643
5	2	300	4	1.93108	460	89	483	80	24.6982
5	2	200	1	2.18014	641	537	640	538	1.41421
5	2	100	2	1.71109	562	471	576	477	15.2315
5	2	300	8	1.55278	282	191	308	167	35.3836
5	2	100	0.5	1.46931	462	471	467	473	5.38516
5	2	300	8	1.52148	564	679	567	689	10.4403
5	2	200	0.5	1.28004	580	196	611	182	34.0147
5	2	100	0.5	1.197	478	290	455	282	24.3516
5	2	200	8	1.78218	709	349	693	303	48.7032
5	2	300	2	1.86231	319	614	362	681	79.6116
5	2	300	4	1.34472	460	679	450	695	18.868
5	2	200	8	2.19768	665	255	640	260	25.4951
5	2	200	4	1.14886	547	187	558	205	21.095
5	2	200	4	1.36829	359	255	386	256	27.0185
5	2	100	1	1.90259	606	350	618	360	15.6205
5	2	300	2	1.0684	564	679	577	689	16.4012
5	3	200	4	1.71768	444	196	424	224	34.4093
5	3	100	2	1.2206	418	350	383	360	36.4005
5	3	300	8	1.61816	742	191	719	229	44.4185
5	3	300	8	1.84238	217	436	269	473	63.8201
5	3	100	4	1.08053	478	478	482	484	7.2111
5	3	300	4	1.52115	772	234	739	259	41.4005
5	3	100	0.5	1.28121	435	320	428	327	9.89949
5	3	200	1	1.80143	359	255	384	274	31.4006
5	3	100	0.5	1.66305	546	290	543	279	11.4018
5	3	300	2	2.15833	217	436	256	443	39.6232
5	3	300	1	1.20899	230	281	214	294	20.6155
5	3	200	1	1.29191	700	316	705	322	7.81025
5	3	100	1	1.48389	576	307	574	288	19.105
5	3	300	1	1.17497	742	577	756	570	15.6525
5	3	200	0.5	1.52922	700	316	685	331	21.2132
5	3	100	2	1.57059	435	320	437	329	9.21954
5	3	200	8	1.19258	444	196	452	249	53.6004
5	3	100	4	1.80728	425	434	437	452	21.6333
5	3	100	2	0.828691	589	320	606	311	19.2354
5	3	300	0.5	2.90611	615	666	626	682	19.4165
5	3	300	0.5	1.21063	252	534	307	544	55.9017
5	3	200	8	1.63371	412	211	410	229	18.1108
5	3	200	4	1.45743	580	196	586	206	11.6619
5	3	200	8	1.37158	547	187	546	195	8.06226
5	3	300	2	1.43215	217	436	217	447	11
5	3	300	4	3.90676	742	577	707	558	39.8246
5	3	100	2	1.21199	610	401	610	413	12
5	3	200	1	1.54081	547	581	569	575	22.8035
5	3	100	0.5	1.12399	495	482	495	486	4
5	3	200	8	2.6083	412	557	451	562	39.3192
5	4	200	0.5	1.17777	700	316	677	306	25.0799
5	4	200	8	2.09113	383	537	411	523	31.305
5	4	300	1	1.38902	772	534	765	551	18.3848
5	4	100	4	1.12232	495	482	497	518	36.0555
5	4	300	8	1.75243	772	234	772	247	13
5	4	200	4	1.49733	444	572	445	578	6.08276
5	4	200	1	1.27846	665	255	664	254	1.41421
5	4	200	8	1.85224	477	187	503	179	27.2029
5	4	300	1	1.11842	564	679	559	696	17.72
5	4	300	0.5	1.46216	705	614	704	654	40.0125
5	4	300	2	1.90173	460	679	483	713	41.0488
5	4	100	8	1.10674	599	334	621	304	37.2022
5	4	100	2	1.87545	435	320	447	302	21.6333
5	4	200	1	1.01679	444	196	429	191	15.8114
5	4	100	1	1.9531	414	401	430	408	17.4642
5	4	200	0.5	1.57117	315	419	328	419	13
5	4	100	4	1.1217	610	367	612	382	15.1327
5	4	100	0.5	0.976657	546	290	546	303	13
5	4	200	2	0.924379	383	231	383	225	6
5	4	100	0.5	1.3239	546	290	545	287	3.16228
5	4	300	2	1.19255	615	666	665	716	70.7107
5	4	300	4	1.83175	319	614	373	639	59.5063
5	4	200	4	2.68228	685	484	675	480	10.7703
5	4	100	2	1.00249	435	320	443	311	12.0416
5	4	100	8	1.55899	589	448	604	447	15.0333
5	4	300	2	1.64085	362	644	390	665	35
5	4	100	1	1.2149	435	320	440	337	17.72
5	4	300	0.5	1.72163	615	102	588	54	55.0727
5	4	300	8	1.91072	282	191	307	140	56.7979
5	4	200	4	1.4303	339	284	342	278	6.7082
5	5	300	8	2.35365	282	191	293	208	20.2485
5	5	200	8	1.85857	547	581	563	569	20
5	5	300	4	3.06101	662	644	684	642	22.0907
5	5	100	1	1.89154	448	307	458	325	20.5913
5	5	300	4	1.73932	772	534	746	530	26.3059
5	5	100	0.5	1.43488	448	461	448	476	15
5	5	100	2	1.60406	462	471	464	497	26.0768
5	5	100	1	1.86245	448	461	455	484	24.0416
5	5	200	2	1.45407	612	211	599	221	16.4012
5	5	300	0.5	1.125	794	281	801	262	20.2485
5	5	100	2	1.891	589	448	584	456	9.43398
5	5	200	4	2.1481	359	255	736	333	384.984
5	5	100	0.5	1.58785	478	478	466	517	40.8044
5	5	300	8	2.15344	705	154	777	146	72.4431
5	5	200	8	1.57765	580	572	631	538	61.2944
5	5	200	1	1.6215	685	484	704	494	21.4709
5	5	200	4	2.68328	444	196	411	255	67.6018
5	5	100	4	6.06769	576	307	517	405	114.39
5	5	200	2	1.15814	700	316	714	308	16.1245
5	5	200	8	2.25599	359	513	390	515	31.0644
5	5	300	1	1.30597	319	614	306	622	15.2643
5	5	300	1	1.53307	564	679	573	683	9.84886
5	5	100	0.5	1.79164	606	418	591	430	19.2094
5	5	200	8	1.41263	383	231	387	234	5
5	5	300	0.5	1.38187	230	487	260	512	39.0512
5	5	300	2	1.40171	460	89	454	77	13.4164
5	5	100	2	0.804087	418	350	407	344	12.53
5	5	100	1	1.31964	576	307	569	316	11.4018
5	5	300	0.5	1.75054	230	281	252	296	26.6271
5	5	200	4	1.10842	641	537	660	542	19.6469
5	6	100	1	2.27697	495	482	486	488	10.8167
5	6	300	0.5	1.01989	564	89	604	78	41.4849
5	6	200	4	1.72396	477	581	506	619	47.8017
5	6	200	8	1.95305	641	231	644	231	3
5	6	200	8	2.81963	477	187	517	179	40.7922
5	6	200	1	1.57749	641	537	635	535	6.32456
5	6	100	0.5	0.788955	599	434	581	433	18.0278
5	6	100	1	0.91577	435	320	434	319	1.41421
5	6	100	0.5	0.879854	610	401	608	399	2.82843
5	6	300	1	1.54043	282	577	332	584	50.4876
5	6	300	2	2.06654	615	102	670	51	75.0067
5	6	200	0.5	0.947136	383	537	376	562	25.9615
5	6	200	0.5	1.11519	547	187	532	161	30.0167
5	6	200	2	1.66004	412	211	408	216	6.40312
5	6	200	2	2.62055	412	211	403	211	9
5	6	300	4	1.5632	564	679	593	700	35.805
5	6	300	0.5	2.50102	460	89	448	150	62.1691
5	6	100	4	1.49648	462	297	459	305	8.544
5	6	300	8	2.47811	319	154	333	133	25.2389
5	6	200	2	2.28995	359	255	377	256	18.0278
5	6	100	2	1.38722	529	286	527	273	13.1529
5	6	100	8	1.33748	425	434	443	443	20.1246
5	6	300	4	3.00181	794	487	740	518	62.2656
5	6	300	8	1.65237	282	577	379	566	97.6217
5	6	300	4	2.08953	362	644	380	689	48.4665
5	6	300	4	1.39462	742	577	685	594	59.4811
5	6	100	1	1.61567	546	290	570	303	27.2947
5	6	100	2	1.04022	610	401	621	396	12.083
5	6	100	1	1.99177	589	320	603	309	17.8045
5	6	200	8	1.46985	412	211	390	242	38.0132
6	1	100	0.5	0.834028	495	482	465	497	33.541
6	1	200	4	1.71849	612	211	626	294	84.1724
6	1	200	2	2.68434	700	452	705	454	5.38516
6	1	300	0.5	1.45469	230	281	211	264	25.4951
6	1	300	1	2.02649	742	191	746	186	6.40312
6	1	200	4	1.19209	339	484	366	495	29.1548
6	1	300	4	1.58088	217	332	212	357	25.4951
6	1	100	2	3.42289	495	286	450	271	47.4342
6	1	100	4	1.95415	425	434	399	426	27.2029
6	1	100	1	1.35624	418	350	396	351	22.0227
6	1	100	8	1.90387	589	320	585	336	16.4924
6	1	300	1	1.64063	742	191	760	185	18.9737
6	1	100	1	2.54403	495	286	478	292	18.0278
6	1	100	8	1.35632	606	350	631	329	32.6497
6	1	300	4	1.97649	662	124	682	168	48.3322
6	1	300	4	1.12972	807	436	778	465	41.0122
6	1	300	2	2.33031	319	614	310	652	39.0512
6	1	200	8	2.26209	477	187	439	212	45.4863
6	1	100	8	1.33955	599	334	597	313	21.095
6	1	200	0.5	1.84331	359	255	352	278	24.0416
6	1	200	2	2.46756	359	513	333	519	26.6833
6	1	200	2	1.67534	477	581	450	601	33.6006
6	1	200	0.5	2.13044	685	484	694	492	12.0416
6	1	300	8	2.07465	615	666	677	674	62.514
6	1	100	0.5	2.06537	462	297	446	317	25.6125
6	1	200	2	1.20285	685	284	710	284	25
6	1	100	0.5	0.879141	546	290	568	280	24.1661
6	1	200	1	1.89884	359	513	361	530	17.1172
6	1	300	1	1.10419	460	89	420	131	58
6	1	300	8	3.16941	409	666	369	693	48.2597
6	2	200	8	2.32687	641	537	644	528	9.48683
6	2	100	1	2.79625	529	286	544	291	15.8114
6	2	100	1	3.02701	562	471	576	482	17.8045
6	2	200	4	2.06374	685	284	678	295	13.0384
6	2	100	2	2.65687	576	461	586	472	14.8661
6	2	300	1	4.35996	460	89	417	107	46.6154
6	2	200	0.5	2.66643	324	452	316	467	17
6	2	100	4	2.01053	448	307	427	306	21.0238
6	2	200	0.5	2.34092	580	572	611	587	34.4384
6	2	300	1	1.82538	230	281	220	288	12.2066
6	2	300	8	2.3261	362	644	353	656	15
6	2	100	4	2.01778	599	334	620	329	21.587
6	2	300	4	2.01801	794	487	790	521	34.2345
6	2	200	4	2.112	709	349	749	368	44.2832
6	2	100	0.5	3.13105	546	478	552	496	18.9737
6	2	100	2	2.70053	418	350	399	348	19.105
6	2	300	2	2.74698	319	154	301	186	36.7151
6	2	200	8	1.96004	315	349	299	358	18.3576
6	2	300	2	1.84887	319	154	322	155	3.16228
6	2	100	0.5	2.20665	562	297	582	290	21.1896
6	2	300	8	1.70581	282	577	253	607	41.7253
6	2	200	8	1.48346	359	513	355	555	42.19
6	2	100	8	2.09221	418	418	404	429	17.8045
6	2	200	2	2.31255	700	316	713	324	15.2643
6	2	100	4	1.80161	576	307	592	305	16.1245
6	2	300	1	2.0041	615	666	625	683	19.7231
6	2	300	0.5	1.99359	742	191	763	194	21.2132
6	2	200	1	2.36077	580	572	613	620	58.2495
6	2	200	2	2.17892	665	513	700	552	52.4023
6	2	300	0.5	1.99763	615	102	614	114	12.0416
6	3	200	1	1.85537	700	316	723	311	23.5372
6	3	300	0.5	5.68487	662	124	678	141	23.3452
6	3	100	1	1.73435	414	367	396	357	20.5913
6	3	300	0.5	2.71985	409	102	422	100	13.1529
6	3	200	1	4.40504	641	231	618	247	28.0179
6	3	200	2	2.57696	444	196	460	200	16.4924
6	3	300	8	2.77961	252	534	243	579	45.8912
6	3	300	4	1.87697	662	124	709	148	52.7731
6	3	200	8	2.08161	315	349	312	340	9.48683
6	3	200	2	1.81794	665	255	687	274	29.0689
6	3	100	8	1.60808	462	471	435	478	27.8927
6	3	300	2	2.41153	230	487	250	509	29.7321
6	3	300	2	2.91424	282	191	282	185	6
6	3	100	4	4.70755	546	290	543	295	5.83095
6	3	300	0.5	1.11159	564	679	564	708	29
6	3	200	8	3.74428	709	349	712	358	9.48683
6	3	300	4	2.56457	319	154	326	188	34.7131
6	3	100	8	1.79464	576	461	590	451	17.2047
6	3	200	2	2.05744	580	572	595	655	84.3445
6	3	100	4	2.15338	425	334	412	326	15.2643
6	3	200	4	2.84336	612	211	601	225	17.8045
6	3	100	0.5	2.55784	448	461	427	489	35
6	3	200	1	3.00807	339	484	336	491	7.61577
6	3	300	8	2.42547	742	577	785	624	63.7024
6	3	100	4	1.47043	448	461	428	462	20.025
6	3	100	2	1.60244	448	307	441	318	13.0384
6	3	200	1	1.9901	339	284	350	294	14.8661
6	3	100	0.5	4.17457	495	286	489	293	9.21954
6	3	300	0.5	3.09925	564	89	566	110	21.095
6	3	100	1	2.64665	425	334	391	330	34.2345
6	4	300	1	2.19573	794	281	776	298	24.7588
6	4	200	0.5	2.3256	339	484	320	503	26.8701
6	4	300	1	2.13888	362	124	368	120	7.2111
6	4	100	2	4.34721	414	401	394	399	20.0998
6	4	200	0.5	2.20398	641	537	672	547	32.573
6	4	100	4	1.09378	576	461	576	464	3
6	4	100	2	1.55608	529	482	530	491	9.05539
6	4	200	4	2.71789	709	349	690	333	24.8395
6	4	300	0.5	3.22782	230	281	194	289	36.8782
6	4	100	0.5	2.03477	562	471	584	500	36.4005
6	4	100	4	1.0899	599	334	633	319	37.1618
6	4	300	1	3.60133	772	534	804	580	56.0357
6	4	300	2	2.43702	772	234	768	248	14.5602
6	4	200	1	1.83722	359	513	336	535	31.8277
6	4	200	0.5	2.09501	685	484	705	486	20.0998
6	4	200	8	1.8686	315	419	327	432	17.6918
6	4	300	8	1.40006	230	281	180	289	50.636
6	4	100	1	2.05189	589	320	611	317	22.2036
6	4	300	2	4.30281	564	679	571	709	30.8058
6	4	300	8	1.87539	252	234	252	237	3
6	4	200	8	1.53641	412	211	414	201	10.198
6	4	200	2	4.39942	685	284	716	348	71.1126
6	4	100	4	1.45826	495	482	409	556	113.455
6	4	100	8	0.978557	606	350	623	337	21.4009
6	4	300	0.5	4.28794	794	281	797	305	24.1868
6	4	200	4	18.0471	547	187	571	561	374.769
6	4	100	1	1.99453	414	401	409	404	5.83095
6	4	300	2	2.01872	282	577	251	625	57.1402
6	4	100	4	2.22416	610	401	618	406	9.43398
6	4	200	8	1.66912	477	187	467	174	16.4012
6	5	300	1	2.07283	615	666	619	690	24.3311
6	5	300	2	2.70827	282	577	276	648	71.2531
6	5	300	8	1.99974	807	436	781	482	52.8394
6	5	200	4	1.82461	641	537	655	565	31.305
6	5	300	8	1.6834	772	534	802	596	68.8767
6	5	300	2	4.38791	409	666	406	704	38.1182
6	5	100	2	4.3866	599	334	612	330	13.6015
6	5	200	4	1.88188	315	349	274	357	41.7732
6	5	100	0.5	3.02782	546	290	551	289	5.09902
6	5	100	4	2.47348	599	334	623	348	27.7849
6	5	200	2	2.22736	665	513	673	530	18.7883
6	5	200	1	2.52125	547	581	536	625	45.3542
6	5	100	8	2.97431	546	290	566	298	21.5407
6	5	200	2	3.05125	412	211	381	201	32.573
6	5	100	0.5	3.38331	546	478	534	480	12.1655
6	5	100	8	2.5621	529	286	537	305	20.6155
6	5	300	4	2.87682	362	644	336	671	37.4833
6	5	100	0.5	4.15571	418	418	408	434	18.868
6	5	300	4	1.3426	409	102	379	119	34.4819
6	5	100	8	2.22796	414	401	393	409	22.4722
6	5	300	1	1.94918	217	436	201	456	25.6125
6	5	300	1	2.84416	662	124	651	119	12.083
6	5	200	0.5	2.00606	444	196	448	195	4.12311
6	5	200	1	1.74609	324	316	316	319	8.544
6	5	200	2	2.9733	547	581	541	612	31.5753
6	5	200	0.5	8.43823	685	284	684	300	16.0312
6	5	300	0.5	3.52026	615	666	634	710	47.927
6	5	200	8	2.12512	315	419	298	423	17.4642
6	5	100	4	2.56339	418	418	402	434	22.6274
6	5	100	1	2.13633	546	290	578	280	33.5261
6	6	200	2	1.8854	383	231	352	246	34.4384
6	6	100	1	1.08435	435	448	434	466	18.0278
6	6	300	8	2.89519	409	102	371	93	39.0512
6	6	300	2	5.28155	742	191	752	197	11.6619
6	6	300	2	3.20198	252	234	276	255	31.8904
6	6	100	0.5	2.68043	448	307	448	326	19
6	6	100	0.5	1.71357	589	320	599	334	17.2047
6	6	300	8	1.88239	282	191	290	256	65.4905
6	6	300	8	2.812	564	89	613	129	63.2535
6	6	200	1	1.93826	324	452	336	457	13
6	6	100	4	1.45298	546	290	561	292	15.1327
6	6	100	2	1.44845	562	471	560	478	7.28011
6	6	100	4	1.81242	562	297	571	303	10.8167
6	6	200	8	3.14615	324	452	298	514	67.2309
6	6	200	2	2.13752	359	513	371	514	12.0416
6	6	100	1	2.43331	495	482	489	474	10
6	6	300	0.5	1.35129	252	534	250	555	21.095
6	6	100	4	1.02589	589	448	561	446	28.0713
6	6	200	0.5	6.75969	665	513	725	620	122.674
6	6	200	1	2.90442	665	255	669	267	12.6491
6	6	100	8	1.83436	589	320	635	277	62.9682
6	6	200	8	2.96912	324	452	351	473	34.2053
6	6	300	4	1.7279	772	534	772	598	64
6	6	200	2	1.16077	665	255	654	270	18.6011
6	6	300	4	1.96229	282	577	305	594	28.6007
6	6	100	4	2.42188	435	448	428	443	8.60233
6	6	300	1	2.77015	282	577	293	602	27.313
6	6	200	1	0.542398	412	557	509	385	197.466
6	6	300	0.5	2.7342	217	436	211	400	36.4966
6	6	200	0.5	2.25875	547	187	550	207	20.2237
7	1	100	8	1.75423	610	367	560	375	50.636
7	1	100	0.5	1.25291	599	334	605	345	12.53
7	1	300	8	2.13743	409	666	382	702	45
7	1	100	2	1.74035	599	334	574	338	25.318
7	1	200	8	2.03182	359	513	391	501	34.176
7	1	100	8	1.85186	529	286	528	318	32.0156
7	1	100	1	4.47949	478	290	472	321	31.5753
7	1	300	8	2.28259	282	191	276	159	32.5576
7	1	200	0.5	4.21456	383	231	364	235	19.4165
7	1	300	4	1.66134	742	191	691	155	62.426
7	1	200	4	1.63654	641	231	651	241	14.1421
7	1	200	2	1.70968	685	284	694	269	17.4929
7	1	200	4	1.4545	685	284	710	281	25.1794
7	1	300	1	2.24239	460	679	473	674	13.9284
7	1	200	0.5	1.50044	339	484	336	477	7.61577
7	1	100	0.5	1.56163	414	401	405	397	9.84886
7	1	200	8	2.27536	685	284	622	316	70.6612
7	1	300	0.5	2.05092	794	487	766	496	29.4109
7	1	300	1	1.98948	615	666	626	688	24.5967
7	1	300	4	2.78947	564	89	610	99	47.0744
7	1	200	1	1.59468	339	284	357	286	18.1108
7	1	300	2	2.88216	217	332	273	326	56.3205
7	1	200	4	1.18627	324	452	340	432	25.6125
7	1	200	1	5.96142	580	572	515	475	116.765
7	1	100	2	1.38668	478	478	480	465	13.1529
7	1	100	2	2.09831	418	350	399	370	27.5862
7	1	100	4	2.40688	435	448	415	448	20
7	1	300	1	2.03558	772	234	759	241	14.7648
7	1	300	0.5	1.27457	282	577	316	557	39.4462
7	1	100	2	1.50379	495	286	485	313	28.7924
7	2	300	4	2.02674	252	234	293	253	45.1885
7	2	100	0.5	1.62279	418	418	412	431	14.3178
7	2	300	4	1.67474	807	332	750	347	58.9406
7	2	200	4	1.37593	324	452	344	460	21.5407
7	2	200	8	1.50589	315	349	309	364	16.1555
7	2	100	2	1.75549	576	307	561	334	30.8869
7	2	200	0.5	1.81386	612	211	615	217	6.7082
7	2	200	2	2.205	359	255	368	255	9
7	2	300	2	2.55193	794	487	768	525	46.0435
7	2	100	1	1.54594	425	334	437	344	15.6205
7	2	300	1	1.48089	794	281	805	304	25.4951
7	2	100	8	1.32015	576	307	601	322	29.1548
7	2	200	4	1.58949	685	284	706	268	26.4008
7	2	100	0.5	1.41655	435	320	451	334	21.2603
7	2	200	2	1.66175	700	316	703	320	5
7	2	200	8	1.89401	383	231	408	260	38.2884
7	2	300	1	2.35495	564	679	616	688	52.7731
7	2	200	8	1.8774	324	316	363	356	55.8659
7	2	100	4	1.78604	462	471	478	479	17.8885
7	2	300	0.5	1.24507	409	102	394	104	15.1327
7	2	200	0.5	1.03184	444	196	438	219	23.7697
7	2	300	8	2.57107	742	191	730	176	19.2094
7	2	100	4	3.19163	435	320	454	324	19.4165
7	2	300	1	2.49573	217	436	220	444	8.544
7	2	100	0.5	1.77322	462	297	455	327	30.8058
7	2	100	1	1.9474	414	401	412	426	25.0799
7	2	100	1	1.5612	546	478	586	499	45.1774
7	2	300	2	1.80354	564	89	603	98	40.025
7	2	200	8	1.90453	700	452	747	483	56.3028
7	2	300	2	2.04153	807	332	800	358	26.9258
7	3	300	1	1.48955	230	487	210	576	91.2195
7	3	200	4	1.31538	612	557	631	599	46.0977
7	3	100	8	2.31493	495	286	482	313	29.9666
7	3	200	4	2.45219	383	537	364	544	20.2485
7	3	100	8	1.39943	576	307	610	279	44.0454
7	3	100	0.5	0.725266	495	482	512	497	22.6716
7	3	300	1	1.68156	807	332	797	350	20.5913
7	3	300	1	1.99416	230	487	156	622	153.951
7	3	200	2	1.59286	612	211	615	281	70.0643
7	3	200	0.5	0.987249	412	557	384	562	28.4429
7	3	200	2	1.61646	444	196	429	204	17
7	3	200	2	1.55162	700	316	667	336	38.5876
7	3	300	2	2.08964	252	534	284	556	38.833
7	3	200	4	1.52338	612	557	609	582	25.1794
7	3	200	4	1.25575	685	284	659	334	56.356
7	3	300	4	2.02839	772	234	765	237	7.61577
7	3	300	8	2.25444	794	487	843	559	87.0919
7	3	100	0.5	2.04568	478	290	472	276	15.2315
7	3	100	1	1.71239	448	307	446	298	9.21954
7	3	300	8	1.9849	564	89	589	22	71.5122
7	3	100	2	2.11774	546	290	551	318	28.4429
7	3	100	2	2.31406	589	448	627	461	40.1622
7	3	100	0.5	1.48527	495	286	470	296	26.9258
7	3	100	1	1.52458	576	461	590	460	14.0357
7	3	200	0.5	1.08405	383	537	418	533	35.2278
7	3	200	4	1.97338	324	316	349	289	36.7967
7	3	300	0.5	1.26978	230	281	232	307	26.0768
7	3	300	8	1.92102	362	124	335	84	48.2597
7	3	300	8	2.87158	252	234	241	219	18.6011
7	3	100	1	1.73804	599	434	593	443	10.8167
7	4	100	0.5	1.43995	562	471	551	466	12.083
7	4	300	1	2.16669	252	234	274	232	22.0907
7	4	300	0.5	1.46385	282	191	285	130	61.0737
7	4	200	4	1.85465	359	513	395	497	39.3954
7	4	300	2	1.47513	409	666	411	689	23.0868
7	4	100	0.5	1.80111	435	320	458	320	23
7	4	300	4	1.7321	564	679	583	682	19.2354
7	4	200	1	1.31989	444	572	455	559	17.0294
7	4	100	1	1.13879	576	461	576	461	0
7	4	300	1	2.11658	252	234	265	216	22.2036
7	4	100	2	1.38669	435	320	434	322	2.23607
7	4	300	4	1.52147	794	487	794	530	43
7	4	100	0.5	1.49646	418	418	432	438	24.4131
7	4	300	4	1.05245	564	679	606	702	47.8853
7	4	100	8	1.54414	448	461	446	454	7.28011
7	4	200	0.5	1.313	580	196	592	211	19.2094
7	4	200	2	2.01734	709	349	703	353	7.2111
7	4	100	8	3.08947	606	350	598	379	30.0832
7	4	200	2	1.39271	641	537	679	568	49.0408
7	4	200	8	1.6088	700	452	711	501	50.2195
7	4	100	1	1.25903	529	482	523	495	14.3178
7	4	200	8	1.53088	700	316	691	335	21.0238
7	4	100	4	1.76474	610	401	625	418	22.6716
7	4	200	4	1.60159	315	419	324	425	10.8167
7	4	300	1	1.06864	564	679	618	713	63.8122
7	4	300	2	2.0305	230	281	266	312	47.5079
7	4	100	8	1.96914	448	461	456	461	8
7	4	200	8	2.19857	477	581	449	635	60.8276
7	4	300	2	2.31295	217	332	157	379	76.2168
7	4	200	0.5	1.53197	477	187	467	208	23.2594
7	5	200	8	1.87598	444	196	420	242	51.8845
7	5	200	8	1.64813	700	316	672	312	28.2843
7	5	100	8	1.93217	546	478	558	478	12
7	5	200	8	3.50834	412	211	428	231	25.6125
7	5	200	0.5	1.74379	477	581	473	587	7.2111
7	5	300	4	1.77356	807	332	794	359	29.9666
7	5	300	2	1.59642	230	487	238	504	18.7883
7	5	100	8	1.97095	606	350	593	360	16.4012
7	5	300	0.5	1.56242	705	614	712	666	52.469
7	5	100	4	2.94182	425	434	669	281	288.002
7	5	200	1	1.87523	359	513	365	534	21.8403
7	5	300	4	1.7594	564	89	589	73	29.6816
7	5	300	2	1.93618	662	644	681	682	42.4853
7	5	300	0.5	1.27628	705	154	702	166	12.3693
7	5	200	0.5	1.34558	339	284	351	283	12.0416
7	5	200	1	1.36827	324	452	336	466	18.4391
7	5	100	4	1.50156	599	434	599	445	11
7	5	200	1	1.37852	412	211	409	226	15.2971
7	5	300	8	1.86089	319	614	309	671	57.8705
7	5	100	4	2.54886	529	286	512	184	103.407
7	5	100	0.5	1.60548	576	307	580	324	17.4642
7	5	300	1	1.52188	794	281	797	275	6.7082
7	5	100	1	1.31805	546	290	560	297	15.6525
7	5	200	2	0.994193	324	452	334	485	34.4819
7	5	300	2	1.23371	362	644	347	670	30.0167
7	5	200	2	1.58475	641	537	643	568	31.0644
7	5	100	0.5	1.18286	546	290	550	304	14.5602
7	5	100	2	0.975586	462	297	455	303	9.21954
7	5	300	4	1.44276	282	577	287	609	32.3883
7	5	100	1	1.31377	478	290	483	314	24.5153
7	6	300	4	1.79727	662	124	698	120	36.2215
7	6	300	8	1.64446	217	436	204	451	19.8494
7	6	200	1	1.12527	665	255	646	292	41.5933
7	6	200	8	1.68156	700	452	687	505	54.5711
7	6	200	8	1.87456	700	316	671	307	30.3645
7	6	100	8	1.61302	462	297	441	302	21.587
7	6	300	1	1.35666	252	234	226	210	35.3836
7	6	100	4	1.30216	576	307	566	321	17.2047
7	6	100	4	1.4759	562	297	555	310	14.7648
7	6	100	0.5	1.88285	599	334	613	326	16.1245
7	6	200	2	1.5299	477	187	506	166	35.805
7	6	100	4	0.827454	599	434	581	449	23.4307
7	6	300	2	1.78393	252	534	231	568	39.9625
7	6	100	0.5	1.81222	425	434	422	443	9.48683
7	6	100	1	1.5867	599	434	590	455	22.8473
7	6	100	0.5	1.53937	448	461	453	458	5.83095
7	6	200	1	1.41014	580	572	588	594	23.4094
7	6	200	0.5	1.25868	383	231	389	238	9.21954
7	6	100	0.5	2.24568	546	290	560	308	22.8035
7	6	300	2	1.52865	460	679	462	707	28.0713
7	6	200	2	2.21157	383	231	340	229	43.0465
7	6	300	2	1.61038	742	191	759	213	27.8029
7	6	300	1	1.94534	615	102	656	62	57.28
7	6	300	4	1.33576	615	102	608	86	17.4642
7	6	200	1	1.45786	580	572	579	627	55.0091
7	6	300	0.5	1.77768	230	281	240	292	14.8661
7	6	100	8	3.02969	414	401	412	420	19.105
7	6	200	8	2.35947	315	419	270	424	45.2769
7	6	300	4	2.4576	460	679	390	701	73.3757
7	6	200	2	1.37718	612	557	618	569	13.4164
8	1	100	4	5.0766	610	401	598	406	13
8	1	200	1	1.72718	580	572	592	555	20.8087
8	1	100	2	1.67648	576	461	547	457	29.2746
8	1	100	4	2.04132	414	401	426	415	18.4391
8	1	200	1	1.45652	709	349	676	345	33.2415
8	1	100	1	1.99703	425	434	446	426	22.4722
8	1	200	8	2.63557	685	284	664	290	21.8403
8	1	300	0.5	4.32465	807	332	823	324	17.8885
8	1	100	2	2.21032	462	471	453	444	28.4605
8	1	200	0.5	17.9796	383	231	495	365	174.642
8	1	100	4	2.26872	495	286	461	312	42.8019
8	1	100	2	1.58727	599	434	575	436	24.0832
8	1	200	8	1.93602	612	211	604	224	15.2643
8	1	300	0.5	1.64399	742	191	757	148	45.5412
8	1	300	4	1.94739	807	332	866	294	70.1783
8	1	200	4	1.58611	324	452	358	488	49.5177
8	1	100	8	1.87457	562	297	575	282	19.8494
8	1	300	8	2.20832	460	679	403	635	72.0069
8	1	300	8	2.46549	705	154	699	124	30.5941
8	1	300	1	2.39385	252	534	306	504	61.7738
8	1	200	2	2.00885	665	513	644	524	23.7065
8	1	300	4	1.72451	362	124	342	125	20.025
8	1	100	8	2.97617	576	307	572	280	27.2947
8	1	300	1	2.66056	319	154	320	134	20.025
8	1	200	2	2.67612	339	284	335	246	38.2099
8	1	200	2	2.04863	700	452	672	458	28.6356
8	1	300	0.5	1.41327	362	644	376	631	19.105
8	1	300	0.5	1.69533	362	124	370	106	19.6977
8	1	200	1	2.20413	315	349	343	330	33.8378
8	1	100	0.5	1.39333	610	401	590	401	20
8	2	100	8	1.85316	589	320	591	327	7.28011
8	2	300	0.5	0.858866	409	666	408	660	6.08276
8	2	200	4	3.57103	612	211	624	245	36.0555
8	2	300	1	3.65517	662	124	661	113	11.0454
8	2	200	0.5	1.46171	315	419	330	427	17
8	2	300	8	1.83914	807	332	837	322	31.6228
8	2	200	2	1.63157	700	452	696	434	18.4391
8	2	200	8	1.42601	477	581	433	644	76.844
8	2	100	1	0.963812	495	286	490	280	7.81025
8	2	200	4	2.56244	700	316	691	309	11.4018
8	2	100	1	1.26813	418	350	424	334	17.088
8	2	100	0.5	1.06231	546	478	554	460	19.6977
8	2	100	0.5	1.32065	599	434	583	428	17.088
8	2	100	2	1.91809	495	482	487	479	8.544
8	2	100	8	1.84347	610	401	610	394	7
8	2	200	4	2.47425	324	316	371	313	47.0956
8	2	200	2	1.96025	580	196	577	213	17.2627
8	2	300	1	2.38511	282	191	287	136	55.2268
8	2	300	1	1.73921	615	666	662	642	52.7731
8	2	200	2	1.5217	359	255	377	245	20.5913
8	2	100	4	1.60632	462	471	451	465	12.53
8	2	200	4	1.5939	339	284	317	274	24.1661
8	2	300	2	3.24081	282	191	295	186	13.9284
8	2	300	1	3.42488	460	89	448	109	23.3238
8	2	300	0.5	2.02217	409	666	405	669	5
8	2	200	0.5	6.30625	641	537	661	589	55.7136
8	2	300	4	2.42779	217	436	287	465	75.7694
8	2	100	2	1.34349	448	461	440	449	14.4222
8	2	100	8	2.71792	576	461	579	471	10.4403
8	2	300	8	3.40108	230	487	213	521	38.0132
8	3	100	4	6.78265	462	471	527	380	111.83
8	3	200	8	1.12107	612	211	605	260	49.4975
8	3	300	1	2.44633	409	102	406	121	19.2354
8	3	300	4	1.80993	794	281	798	241	40.1995
8	3	300	1	1.617	794	281	829	266	38.0789
8	3	300	2	2.46434	252	234	249	215	19.2354
8	3	300	4	1.56927	807	436	826	467	36.3593
8	3	300	4	2.73451	252	534	284	548	34.9285
8	3	300	0.5	1.76196	319	614	338	612	19.105
8	3	200	1	2.0944	359	255	402	269	45.2217
8	3	100	2	2.2103	606	418	699	455	100.09
8	3	300	2	2.33842	362	644	378	615	33.121
8	3	200	8	2.61835	685	284	692	290	9.21954
8	3	100	2	1.5445	610	367	643	343	40.8044
8	3	200	2	1.2316	359	513	400	494	45.1885
8	3	200	0.5	1.6445	709	349	692	351	17.1172
8	3	100	0.5	1.09466	418	418	414	453	35.2278
8	3	100	8	2.06593	418	350	401	341	19.2354
8	3	300	8	2.31364	409	102	367	123	46.9574
8	3	100	4	1.90008	599	434	603	418	16.4924
8	3	300	1	1.85722	252	234	250	213	21.095
8	3	100	4	1.19974	589	320	607	323	18.2483
8	3	200	1	1.58858	685	484	694	501	19.2354
8	3	100	8	1.49723	435	448	450	484	39
8	3	100	0.5	1.68144	495	286	485	289	10.4403
8	3	200	2	2.01672	324	316	334	319	10.4403
8	3	200	0.5	1.45915	383	231	380	253	22.2036
8	3	200	8	1.57771	324	452	371	455	47.0956
8	3	200	0.5	1.07048	444	572	420	582	26
8	3	100	1	1.8918	435	448	444	451	9.48683
8	4	300	4	1.4065	705	614	718	628	19.105
8	4	300	0.5	1.46705	742	577	696	555	50.9902
8	4	300	1	1.42721	217	332	221	364	32.249
8	4	100	4	1.27093	529	286	527	296	10.198
8	4	300	2	1.39532	217	436	239	439	22.2036
8	4	200	0.5	1.86783	339	484	339	483	1
8	4	100	2	3.17128	495	482	482	472	16.4012
8	4	100	1	2.06007	576	461	587	457	11.7047
8	4	100	4	2.06632	414	367	422	348	20.6155
8	4	200	1	2.05062	339	284	354	285	15.0333
8	4	100	2	3.45385	606	418	613	429	13.0384
8	4	300	1	1.88418	807	436	791	422	21.2603
8	4	200	8	2.26668	477	581	469	590	12.0416
8	4	200	4	1.71579	324	452	352	492	48.8262
8	4	300	4	2.25756	230	281	242	293	16.9706
8	4	100	4	1.73551	610	401	633	403	23.0868
8	4	300	8	3.50546	807	436	814	441	8.60233
8	4	200	2	1.35531	412	557	432	550	21.1896
8	4	100	8	2.13258	576	461	579	461	3
8	4	300	1	2.31142	362	644	343	640	19.4165
8	4	200	0.5	1.17681	547	581	578	618	48.2701
8	4	200	8	1.97852	580	196	603	223	35.4683
8	4	300	8	1.95688	772	534	760	540	13.4164
8	4	100	1	1.00014	414	367	400	365	14.1421
8	4	100	0.5	1.10073	562	471	544	488	24.7588
8	4	200	2	1.95294	547	581	567	583	20.0998
8	4	100	8	1.29137	589	320	601	292	30.4631
8	4	200	0.5	0.87075	324	452	328	480	28.2843
8	4	200	2	2.03418	580	572	573	517	55.4437
8	4	300	0.5	1.41969	807	436	833	457	33.4215
8	5	300	4	5.54232	662	644	537	397	276.828
8	5	300	1	1.97095	742	191	747	182	10.2956
8	5	100	2	1.62394	599	334	617	328	18.9737
8	5	100	0.5	1.40606	418	350	418	314	36
8	5	200	0.5	1.97134	339	284	332	264	21.1896
8	5	100	4	1.73695	414	401	442	421	34.4093
8	5	100	8	1.49085	589	320	633	302	47.5395
8	5	200	0.5	1.33378	359	513	394	491	41.3401
8	5	300	1	1.57495	615	102	636	100	21.095
8	5	200	8	1.42652	477	581	465	511	71.0211
8	5	200	0.5	1.18237	339	484	363	468	28.8444
8	5	300	8	1.29584	409	666	377	655	33.8378
8	5	100	2	2.6616	606	350	610	332	18.4391
8	5	200	1	1.62976	580	572	586	554	18.9737
8	5	200	4	1.36797	547	187	570	186	23.0217
8	5	100	8	2.01517	462	471	448	460	17.8045
8	5	300	4	1.86127	615	666	616	674	8.06226
8	5	200	4	1.74939	547	187	571	183	24.3311
8	5	300	2	1.47522	282	577	339	550	63.0714
8	5	200	2	1.58412	477	581	464	588	14.7648
8	5	100	1	2.15429	495	286	486	296	13.4536
8	5	200	4	1.8049	315	419	360	428	45.8912
8	5	100	2	1.42306	435	448	421	451	14.3178
8	5	300	8	1.43519	319	154	309	161	12.2066
8	5	100	0.5	1.56432	448	461	462	447	19.799
8	5	100	0.5	2.14241	610	401	604	410	10.8167
8	5	300	2	2.35583	615	102	627	133	33.2415
8	5	300	8	1.42832	794	487	799	461	26.4764
8	5	200	1	3.11299	709	349	734	348	25.02
8	5	300	1	2.06655	409	666	382	673	27.8927
8	6	100	8	1.78116	418	350	382	338	37.9473
8	6	200	8	2.68577	580	572	604	498	77.7946
8	6	300	4	2.63914	252	534	380	558	130.231
8	6	200	4	1.41383	383	537	384	531	6.08276
8	6	100	2	1.68564	414	401	422	412	13.6015
8	6	300	8	2.62946	252	234	209	207	50.774
8	6	100	0.5	1.87543	414	367	423	370	9.48683
8	6	100	1	1.93517	418	418	441	428	25.0799
8	6	100	4	2.01729	448	307	429	330	29.8329
8	6	200	1	1.65837	383	231	394	232	11.0454
8	6	100	8	2.02375	529	482	552	502	30.4795
8	6	200	0.5	2.61547	612	211	632	229	26.9072
8	6	200	8	1.69266	709	419	745	448	46.2277
8	6	100	2	1.36926	425	334	407	332	18.1108
8	6	300	4	1.91203	742	577	755	565	17.6918
8	6	300	2	1.5145	252	234	264	234	12
8	6	300	0.5	4.2035	705	154	687	178	30
8	6	100	0.5	1.27256	414	401	412	404	3.60555
8	6	100	2	2.34134	562	471	571	441	31.3209
8	6	300	1	1.91521	460	679	442	671	19.6977
8	6	200	4	1.92321	359	513	413	513	54
8	6	200	1	1.52857	685	484	656	462	36.4005
8	6	300	0.5	2.26021	564	89	563	103	14.0357
8	6	200	0.5	1.19861	324	452	369	423	53.535
8	6	300	2	1.73083	252	534	271	520	23.6008
8	6	200	1	1.33964	665	513	687	504	23.7697
8	6	100	1	2.33043	478	290	472	283	9.21954
8	6	300	4	2.57173	794	487	791	486	3.16228
8	6	300	8	1.76003	362	644	396	629	37.1618
8	6	200	2	1.24299	700	452	657	424	51.3128
9	1	200	1	2.29339	641	231	629	250	22.4722
9	1	100	4	3.19155	576	307	595	327	27.5862
9	1	300	2	4.15131	230	281	219	276	12.083
9	1	200	1	1.3058	324	452	335	494	43.4166
9	1	200	0.5	1.24269	359	513	352	553	40.6079
9	1	100	8	1.90316	589	320	603	316	14.5602
9	1	300	4	2.43755	282	577	269	645	69.2315
9	1	200	8	1.82736	324	452	332	497	45.7056
9	1	300	0.5	1.17457	615	102	625	120	20.5913
9	1	100	8	2.50706	418	350	426	347	8.544
9	1	300	8	3.54828	662	124	702	104	44.7214
9	1	100	1	2.09888	425	434	413	468	36.0555
9	1	100	4	1.21516	546	478	592	520	62.2896
9	1	200	4	1.4934	580	572	601	643	74.0405
9	1	200	0.5	1.17352	339	284	335	291	8.06226
9	1	300	2	1.11456	807	332	860	321	54.1295
9	1	100	2	1.14903	576	307	582	322	16.1555
9	1	200	2	1.76237	685	284	720	305	40.8167
9	1	300	0.5	2.1174	460	679	429	716	48.2701
9	1	300	1	2.2747	615	666	626	703	38.6005
9	1	300	1	1.68819	409	102	391	107	18.6815
9	1	300	2	2.46399	615	666	659	712	63.6553
9	1	200	4	1.4091	612	211	661	241	57.4543
9	1	100	8	1.54733	418	418	369	514	107.782
9	1	100	8	1.52257	478	478	473	528	50.2494
9	1	200	2	1.70252	709	419	738	459	49.4065
9	1	100	1	1.30631	435	448	410	478	39.0512
9	1	200	0.5	2.167	580	572	604	630	62.7694
9	1	300	0.5	0.893853	319	614	268	649	61.8547
9	1	100	4	1.5391	529	286	510	308	29.0689
9	2	200	1	2.44596	324	452	293	478	40.4599
9	2	100	2	2.22542	589	320	584	335	15.8114
9	2	200	8	2.46777	324	316	313	352	37.6431
9	2	200	1	3.41183	665	255	651	276	25.2389
9	2	300	4	2.00424	252	234	238	254	24.4131
9	2	100	0.5	0.911775	478	478	473	548	70.1783
9	2	200	8	2.21105	580	196	564	186	18.868
9	2	300	4	2.02404	615	666	628	692	29.0689
9	2	200	0.5	1.17322	665	513	677	533	23.3238
9	2	100	4	1.59553	599	334	634	314	40.3113
9	2	100	2	1.18616	418	418	413	443	25.4951
9	2	200	4	1.60469	709	349	734	344	25.4951
9	2	200	2	1.75282	580	196	609	195	29.0172
9	2	300	8	1.49744	362	644	351	724	80.7527
9	2	300	8	4.93609	460	89	384	114	80.0062
9	2	300	1	1.4314	230	281	235	298	17.72
9	2	100	2	1.83481	495	286	480	287	15.0333
9	2	300	8	2.62691	794	281	805	293	16.2788
9	2	100	2	1.99772	462	297	462	309	12
9	2	300	1	1.32455	282	577	284	605	28.0713
9	2	200	4	3.83529	324	316	300	330	27.7849
9	2	300	0.5	2.16327	742	191	776	199	34.9285
9	2	100	0.5	1.42803	414	401	371	431	52.4309
9	2	300	1	2.34295	807	332	808	357	25.02
9	2	100	2	1.90197	589	320	595	314	8.48528
9	2	200	0.5	2.57245	315	419	296	438	26.8701
9	2	200	1	1.48269	412	557	405	600	43.566
9	2	100	0.5	1.08438	546	290	569	270	30.4795
9	2	100	8	2.62189	435	320	396	304	42.1545
9	2	300	4	3.91218	807	436	839	496	68
9	3	300	1	2.02963	742	577	751	623	46.8722
9	3	300	2	2.25799	252	534	232	625	93.1719
9	3	100	4	2.4083	562	471	583	499	35
9	3	200	1	3.21213	665	513	683	542	34.1321
9	3	100	8	1.49928	462	471	426	493	42.19
9	3	100	1	1.0963	529	286	550	290	21.3776
9	3	200	8	1.70849	709	349	725	377	32.249
9	3	300	1	2.10119	662	644	672	707	63.7887
9	3	300	0.5	3.68514	772	534	771	578	44.0114
9	3	100	8	1.64442	478	290	436	301	43.4166
9	3	200	4	4.78054	315	349	302	357	15.2643
9	3	200	4	1.88653	547	187	669	214	124.952
9	3	100	4	1.44637	414	401	383	424	38.6005
9	3	100	2	1.48363	529	482	535	519	37.4833
9	3	100	0.5	2.06262	414	367	409	366	5.09902
9	3	300	4	1.49281	742	577	731	596	21.9545
9	3	100	8	3.74545	546	290	567	316	33.4215
9	3	200	0.5	2.88921	359	255	363	271	16.4924
9	3	200	2	1.70628	665	255	663	261	6.32456
9	3	100	2	1.70924	606	350	650	367	47.1699
9	3	200	0.5	2.16584	339	284	312	295	29.1548
9	3	100	0.5	3.68776	478	478	460	499	27.6586
9	3	200	2	2.18356	324	452	304	495	47.4236
9	3	300	4	2.41695	772	534	742	573	49.2037
9	3	200	0.5	1.51592	612	557	649	627	79.177
9	3	300	1	2.56131	252	534	237	603	70.6116
9	3	300	8	2.42658	319	614	273	640	52.8394
9	3	200	2	2.84471	324	316	341	319	17.2627
9	3	300	8	1.85211	807	436	828	502	69.2604
9	3	300	1	4.28084	282	191	280	184	7.28011
9	4	300	4	20.6464	615	102	549	378	283.782
9	4	300	2	2.16924	772	234	773	231	3.16228
9	4	200	8	2.38092	324	452	301	505	57.7754
9	4	300	1	3.30353	564	679	541	691	25.9422
9	4	100	1	3.37372	495	482	465	508	39.6989
9	4	300	4	2.33116	230	281	229	296	15.0333
9	4	100	2	2.30789	414	367	404	376	13.4536
9	4	200	1	2.50254	547	581	545	625	44.0454
9	4	200	4	3.15367	685	284	656	310	38.9487
9	4	300	1	3.13976	252	534	253	546	12.0416
9	4	300	0.5	2.83543	772	234	922	199	154.029
9	4	300	4	2.484	362	644	355	702	58.4209
9	4	300	8	4.78911	794	281	841	276	47.2652
9	4	200	1	2.0979	444	196	464	204	21.5407
9	4	200	0.5	2.20879	315	349	297	344	18.6815
9	4	300	4	2.72417	282	577	304	640	66.7308
9	4	200	0.5	5.0035	444	572	430	610	40.4969
9	4	100	0.5	1.72767	478	290	463	299	17.4929
9	4	100	8	2.46521	606	418	641	460	54.6717
9	4	100	8	1.89804	529	482	536	484	7.28011
9	4	100	2	1.71948	599	434	616	468	38.0132
9	4	200	0.5	2.80562	444	572	424	633	64.195
9	4	300	8	3.08766	742	577	746	634	57.1402
9	4	100	1	1.73687	529	286	538	295	12.7279
9	4	200	2	2.91524	641	231	654	245	19.105
9	4	100	2	1.37198	599	334	622	340	23.7697
9	4	100	2	1.47444	478	478	465	515	39.2173
9	4	200	0.5	2.30372	709	349	709	361	12
9	4	200	4	1.30208	444	572	398	637	79.6304
9	4	100	8	2.24076	462	471	458	463	8.94427
9	5	200	2	3.97404	580	572	597	614	45.31
9	5	100	8	2.10937	599	434	615	465	34.8855
9	5	200	8	2.40645	665	513	651	546	35.8469
9	5	100	1	1.99353	610	401	629	422	28.3196
9	5	200	2	2.83198	547	187	548	208	21.0238
9	5	100	4	2.52175	414	401	400	413	18.4391
9	5	300	1	2.31901	319	614	299	627	23.8537
9	5	300	8	2.19063	282	577	256	621	51.1077
9	5	200	0.5	2.24492	547	187	539	181	10
9	5	200	0.5	2.99482	359	255	346	272	21.4009
9	5	300	0.5	1.71549	742	191	749	158	33.7343
9	5	300	1	4.26858	217	332	217	341	9
9	5	100	1	1.58867	606	418	609	440	22.2036
9	5	300	1	2.54871	662	124	689	110	30.4138
9	5	300	8	2.48885	409	666	371	736	79.6492
9	5	100	4	1.94672	418	418	426	478	60.531
9	5	100	4	2.1272	414	401	406	406	9.43398
9	5	300	8	1.69353	282	577	238	602	50.6063
9	5	200	2	2.64239	685	484	703	542	60.7289
9	5	300	8	2.89878	362	644	286	693	90.4268
9	5	100	4	1.40663	418	418	410	381	37.855
9	5	100	0.5	1.9159	418	350	414	348	4.47214
9	5	300	0.5	2.87448	409	102	385	132	38.4187
9	5	100	2	2.19814	589	448	584	456	9.43398
9	5	100	0.5	1.57057	610	367	610	390	23
9	5	300	1	3.0101	615	102	615	131	29
9	5	200	2	1.81718	641	537	643	559	22.0907
9	5	200	2	2.68773	359	513	347	541	30.4631
9	5	200	4	1.98495	315	349	301	361	18.4391
9	5	200	4	2.29101	444	196	391	223	59.4811
9	6	100	0.5	1.16442	478	290	475	306	16.2788
9	6	300	2	2.27465	662	124	658	118	7.2111
9	6	200	2	1.83104	324	452	302	497	50.0899
9	6	300	0.5	2.27033	319	614	303	658	46.8188
9	6	100	0.5	1.70781	425	434	414	447	17.0294
9	6	200	8	2.49312	700	316	723	318	23.0868
9	6	200	2	1.65694	315	349	322	360	13.0384
9	6	200	0.5	3.22016	665	513	670	548	35.3553
9	6	300	4	1.67354	794	487	730	516	70.2638
9	6	200	4	1.96025	547	581	519	638	63.5059
9	6	100	1	1.81633	418	350	411	348	7.28011
9	6	300	1	2.03239	362	124	325	146	43.0465
9	6	200	1	1.71483	547	187	561	172	20.5183
9	6	300	0.5	2.83055	252	534	247	565	31.4006
9	6	200	4	3.11459	383	231	367	243	20
9	6	300	4	1.91383	409	666	389	711	49.2443
9	6	300	1	1.54904	772	534	789	573	42.5441
9	6	300	8	2.61802	460	679	425	726	58.6003
9	6	100	0.5	1.7137	610	367	627	364	17.2627
9	6	200	8	1.39459	383	537	363	526	22.8254
9	6	100	2	1.53855	478	478	432	479	46.0109
9	6	100	4	1.21246	606	418	613	437	20.2485
9	6	300	1	1.84243	217	436	217	447	11
9	6	100	8	1.79353	495	286	462	285	33.0151
9	6	200	1	1.13616	315	419	330	426	16.5529
9	6	200	2	1.8338	580	196	607	183	29.9666
9	6	100	8	1.53806	546	478	557	472	12.53
9	6	300	2	2.41142	217	436	228	444	13.6015
9	6	100	4	1.8677	546	290	573	268	34.8281
9	6	100	8	2.0182	478	478	448	491	32.6956
10	1	200	0.5	0.914516	580	196	577	198	3.60555
10	1	300	2	2.8112	230	487	217	536	50.6952
10	1	200	4	2.1702	444	572	380	582	64.7765
10	1	300	8	1.96887	807	436	512	382	299.902
10	1	300	4	2.47842	615	102	662	100	47.0425
10	1	100	2	2.2908	418	350	414	323	27.2947
10	1	300	0.5	4.48557	615	666	406	283	436.314
10	1	100	4	1.14337	425	334	423	313	21.095
10	1	200	4	2.20344	665	513	655	539	27.8568
10	1	200	4	1.32629	477	187	452	142	51.4782
10	1	300	1	1.79577	230	487	257	471	31.3847
10	1	100	8	1.59459	606	350	587	351	19.0263
10	1	200	0.5	1.46036	412	557	394	550	19.3132
10	1	100	8	0.948035	606	350	626	354	20.3961
10	1	100	1	1.33663	495	286	500	276	11.1803
10	1	100	1	1.46655	610	367	594	361	17.088
10	1	100	1	1.17057	576	307	590	311	14.5602
10	1	300	1	2.11294	230	487	264	530	54.8179
10	1	100	2	1.78585	599	334	603	317	17.4642
10	1	100	1	1.32458	610	401	597	423	25.5539
10	1	200	0.5	1.73226	324	316	323	300	16.0312
10	1	200	0.5	1.44834	339	284	283	258	61.7414
10	1	200	2	1.60317	665	513	622	506	43.566
10	1	300	0.5	2.31278	705	614	701	682	68.1175
10	1	300	8	1.17797	662	124	716	141	56.6127
10	1	300	2	1.65178	252	534	208	579	62.9365
10	1	100	8	2.43098	589	448	595	461	14.3178
10	1	200	4	1.24309	612	211	632	258	51.0784
10	1	300	8	1.17945	662	644	667	679	35.3553
10	1	200	2	2.11646	359	513	353	592	79.2275
10	2	100	8	1.26171	462	297	384	452	173.519
10	2	300	8	1.67771	564	89	570	112	23.7697
10	2	300	4	1.26616	282	577	270	612	37
10	2	200	2	1.7382	339	484	304	535	61.8547
10	2	200	2	1.60618	685	284	675	303	21.4709
10	2	300	0.5	1.49666	217	436	247	483	55.7584
10	2	300	8	1.27006	742	577	651	611	97.1442
10	2	300	1	1.55464	662	644	647	665	25.807
10	2	100	0.5	1.91773	425	334	427	344	10.198
10	2	200	8	1.02752	709	419	619	461	99.3177
10	2	300	1	1.45478	662	124	638	141	29.4109
10	2	100	2	1.33157	606	418	614	409	12.0416
10	2	300	0.5	1.21378	794	487	713	488	81.0062
10	2	200	4	1.74097	359	513	352	541	28.8617
10	2	100	8	1.01047	529	286	557	239	54.7083
10	2	100	0.5	1.29164	589	448	580	454	10.8167
10	2	100	8	1.22892	462	297	437	303	25.7099
10	2	100	4	1.19944	610	367	589	324	47.8539
10	2	200	4	1.5223	580	196	591	228	33.8378
10	2	200	1	1.54469	477	187	465	181	13.4164
10	2	200	0.5	1.75217	324	316	323	312	4.12311
10	2	100	2	2.17061	546	290	555	293	9.48683
10	2	200	2	0.904415	315	349	297	366	24.7588
10	2	300	0.5	1.57086	705	154	722	153	17.0294
10	2	100	1	1.0491	529	482	534	473	10.2956
10	2	300	2	1.22231	230	281	234	229	52.1536
10	2	200	1	1.43493	700	316	689	312	11.7047
10	2	200	1	1.8563	665	255	653	254	12.0416
10	2	300	4	3.6449	615	666	622	677	13.0384
10	2	100	4	2.93161	462	297	447	296	15.0333
10	3	100	8	1.16762	589	448	598	447	9.05539
10	3	300	8	1.70998	217	436	281	463	69.4622
10	3	200	2	1.96853	383	231	395	236	13
10	3	200	1	2.50989	580	196	577	189	7.61577
10	3	300	8	4.02988	319	614	364	621	45.5412
10	3	300	8	1.90497	772	534	730	587	67.624
10	3	100	0.5	4.48425	462	471	450	484	17.6918
10	3	100	8	1.54823	562	297	591	281	33.121
10	3	200	2	1.9147	547	581	539	588	10.6301
10	3	300	0.5	1.53324	794	487	788	547	60.2993
10	3	100	0.5	1.18558	425	334	419	343	10.8167
10	3	100	1	2.22094	529	482	500	474	30.0832
10	3	200	2	1.14734	359	255	326	249	33.541
10	3	100	2	1.18657	418	350	420	353	3.60555
10	3	300	8	1.43973	564	89	580	123	37.5766
10	3	200	4	2.94396	709	419	678	432	33.6155
10	3	200	4	1.61252	685	484	674	520	37.6431
10	3	300	2	1.89942	319	154	285	186	46.6905
10	3	300	4	1.43249	794	487	785	606	119.34
10	3	100	4	1.66728	576	307	584	317	12.8062
10	3	100	0.5	2.27819	435	448	419	483	38.4838
10	3	200	1	2.45938	339	284	324	314	33.541
10	3	200	1	1.602	359	255	359	232	23
10	3	100	4	0.886357	589	320	615	342	34.0588
10	3	300	0.5	2.07944	662	644	647	688	46.4866
10	3	200	1	1.47668	444	196	425	198	19.105
10	3	200	0.5	2.10621	324	316	287	319	37.1214
10	3	300	1	1.21125	705	614	697	632	19.6977
10	3	100	2	1.12429	562	471	564	481	10.198
10	3	300	4	1.20797	230	487	213	552	67.1863
10	4	200	1	1.79924	477	187	425	200	53.6004
10	4	300	8	6.0089	409	102	390	101	19.0263
10	4	200	8	1.46688	665	255	703	232	44.4185
10	4	100	8	6.62766	546	290	547	271	19.0263
10	4	100	2	5.64686	478	478	470	462	17.8885
10	4	200	2	1.76192	359	513	358	528	15.0333
10	4	100	0.5	1.07948	589	448	576	439	15.8114
10	4	300	1	2.21276	705	154	715	143	14.8661
10	4	100	0.5	1.41288	562	471	579	505	38.0132
10	4	100	4	1.33954	495	286	482	261	28.178
10	4	300	0.5	2.2035	807	332	791	340	17.8885
10	4	200	0.5	1.99151	612	211	627	232	25.807
10	4	300	0.5	2.8559	662	124	689	143	33.0151
10	4	200	8	1.3806	383	537	368	562	29.1548
10	4	100	2	2.84611	418	350	396	342	23.4094
10	4	300	4	1.45784	230	281	198	266	35.3412
10	4	100	4	2.14594	546	290	552	267	23.7697
10	4	200	2	1.06372	580	572	551	572	29
10	4	200	1	1.23189	315	419	314	471	52.0096
10	4	100	4	1.21239	448	461	402	496	57.8014
10	4	100	8	2.14705	606	350	597	328	23.7697
10	4	200	1	1.50453	709	349	703	344	7.81025
10	4	300	2	1.57725	460	679	356	264	427.833
10	4	200	0.5	1.23829	315	349	306	350	9.05539
10	4	200	2	1.14133	315	349	281	347	34.0588
10	4	300	4	1.5477	362	124	322	182	70.4557
10	4	300	4	1.16876	319	614	252	667	85.4283
10	4	300	1	1.39903	460	679	432	672	28.8617
10	4	300	1	2.10692	282	577	180	679	144.25
10	4	100	8	1.28535	562	297	608	268	54.3783
10	5	100	0.5	12.8004	462	297	526	136	173.254
10	5	300	8	1.13867	217	436	260	464	51.3128
10	5	200	8	2.17963	324	316	258	312	66.1211
10	5	100	0.5	1.6583	435	320	424	321	11.0454
10	5	200	0.5	3.68209	444	196	443	261	65.0077
10	5	100	2	1.21319	478	478	459	541	65.8027
10	5	300	1	2.88206	319	614	298	642	35
10	5	100	0.5	1.41487	546	478	542	460	18.4391
10	5	200	8	1.357	339	284	341	292	8.24621
10	5	200	1	1.23975	359	513	363	565	52.1536
10	5	200	2	1.66126	612	211	644	191	37.7359
10	5	200	4	1.50935	477	581	482	566	15.8114
10	5	300	4	1.76632	230	281	136	224	109.932
10	5	300	1	1.39026	460	89	398	83	62.2896
10	5	100	1	1.23554	462	297	431	288	32.28
10	5	200	2	1.24556	547	187	543	199	12.6491
10	5	300	4	1.80036	615	102	645	84	34.9857
10	5	100	4	1.0364	448	307	437	289	21.095
10	5	300	0.5	1.24355	282	577	222	623	75.6042
10	5	300	4	3.7631	319	154	199	158	120.067
10	5	200	1	1.48377	641	537	635	565	28.6356
10	5	200	0.5	5.03636	700	452	620	514	101.213
10	5	100	2	3.17313	562	471	655	501	97.719
10	5	200	4	1.04399	580	196	603	176	30.4795
10	5	100	8	1.10529	425	334	409	279	57.28
10	5	100	2	3.41969	448	461	411	241	223.09
10	5	300	8	0.94595	460	679	325	715	139.718
10	5	100	2	3.48017	529	482	484	661	184.57
10	5	300	1	2.4036	807	332	785	275	61.0983
10	5	300	8	1.19242	742	577	722	590	23.8537
10	6	100	4	2.46941	478	290	433	283	45.5412
10	6	200	8	8.18679	641	537	394	308	336.823
10	6	100	8	1.241	610	367	615	350	17.72
10	6	100	0.5	1.20159	425	434	410	450	21.9317
10	6	200	4	3.30034	359	255	231	410	201.02
10	6	200	0.5	1.30898	412	211	398	193	22.8035
10	6	300	2	2.57426	742	191	720	196	22.561
10	6	100	1	1.3226	435	320	428	328	10.6301
10	6	300	4	1.20768	662	644	675	686	43.9659
10	6	300	0.5	1.77277	460	679	437	683	23.3452
10	6	300	8	1.52429	362	644	355	698	54.4518
10	6	300	2	1.25847	362	124	348	118	15.2315
10	6	100	1	0.960295	589	448	595	455	9.21954
10	6	300	0.5	1.89213	615	102	616	119	17.0294
10	6	200	2	2.01963	359	255	343	263	17.8885
10	6	200	4	1.56022	339	484	302	480	37.2156
10	6	300	2	1.35499	460	89	431	60	41.0122
10	6	300	1	0.932298	319	154	253	155	66.0076
10	6	100	1	1.3348	606	350	597	335	17.4929
10	6	100	0.5	0.995264	576	461	571	482	21.587
10	6	300	8	1.53649	409	102	360	84	52.2015
10	6	100	1	1.42629	606	350	768	200	220.78
10	6	200	4	1.90149	612	557	598	525	34.9285
10	6	100	8	1.77934	425	434	433	486	52.6118
10	6	200	0.5	1.65675	359	513	351	513	8
10	6	200	4	1.17801	580	572	600	601	35.2278
10	6	200	1	1.78882	315	419	298	441	27.8029
10	6	100	2	1.35599	435	448	384	475	57.7062
10	6	300	2	1.69314	662	124	702	131	40.6079
10	6	200	8	1.18764	665	255	705	209	60.959
11	1	100	2	2.84782	418	418	415	432	14.3178
11	1	100	1	2.25314	462	297	443	318	28.3196
11	1	200	4	4.62461	641	231	587	284	75.6637
11	1	200	1	3.4441	685	284	660	287	25.1794
11	1	100	1	3.92222	418	350	406	345	13
11	1	300	0.5	1.89013	217	332	206	330	11.1803
11	1	100	2	2.72996	435	448	428	434	15.6525
11	1	300	4	4.30735	460	89	414	106	49.0408
11	1	100	2	3.68555	599	334	557	332	42.0476
11	1	100	0.5	1.71909	599	434	574	437	25.1794
11	1	300	1	5.48414	362	644	341	661	27.0185
11	1	200	1	2.55918	315	419	331	426	17.4642
11	1	300	8	2.34245	807	436	806	458	22.0227
11	1	200	0.5	5.5424	383	231	364	245	23.6008
11	1	300	8	2.08503	794	281	774	303	29.7321
11	1	200	2	3.10902	665	255	650	255	15
11	1	300	1	3.3758	409	102	387	105	22.2036
11	1	100	0.5	3.06009	478	290	466	299	15
11	1	200	4	2.77759	709	349	670	345	39.2046
11	1	300	0.5	3.11007	252	234	256	273	39.2046
11	1	100	8	2.08765	448	307	421	342	44.2041
11	1	200	8	3.20008	444	196	389	249	76.3806
11	1	200	2	1.77905	477	581	454	626	50.5371
11	1	300	0.5	5.05459	362	124	329	159	48.1041
11	1	200	4	2.58713	665	255	640	283	37.5366
11	1	300	4	3.60083	460	679	441	656	29.8329
11	1	200	8	2.91647	641	537	616	562	35.3553
11	1	100	4	2.06722	610	401	604	498	97.1854
11	1	300	8	2.46461	409	666	381	683	32.7567
11	1	100	2	2.22552	478	478	452	492	29.5296
11	2	100	0.5	2.61481	589	448	572	451	17.2627
11	2	200	0.5	2.11937	383	231	366	233	17.1172
11	2	200	4	2.58896	324	452	329	452	5
11	2	200	2	2.25287	580	572	548	570	32.0624
11	2	100	0.5	1.27741	562	297	561	303	6.08276
11	2	300	8	2.75326	460	679	447	681	13.1529
11	2	300	4	1.8682	742	191	735	211	21.1896
11	2	300	0.5	4.08706	772	234	767	287	53.2353
11	2	300	2	4.19868	705	154	701	144	10.7703
11	2	300	1	1.42591	772	534	733	550	42.1545
11	2	200	1	1.89485	477	581	460	589	18.7883
11	2	100	1	2.20294	546	290	543	310	20.2237
11	2	300	8	4.0936	772	234	687	260	88.8876
11	2	300	8	2.41811	282	577	264	556	27.6586
11	2	300	4	2.38411	807	332	812	329	5.83095
11	2	100	8	2.05895	425	334	382	353	47.0106
11	2	200	2	6.76247	547	581	549	584	3.60555
11	2	100	4	1.73229	448	461	426	483	31.1127
11	2	300	8	1.65378	615	102	627	96	13.4164
11	2	300	0.5	3.9893	217	436	235	443	19.3132
11	2	200	1	2.76208	383	231	373	257	27.8568
11	2	200	2	2.15008	700	452	684	444	17.8885
11	2	100	8	2.37036	425	334	410	352	23.4307
11	2	100	0.5	2.21837	448	307	416	300	32.7567
11	2	100	4	2.80295	495	286	475	268	26.9072
11	2	100	2	1.89132	529	482	546	486	17.4642
11	2	200	1	2.63055	315	349	312	354	5.83095
11	2	100	2	1.60778	589	320	585	327	8.06226
11	2	200	4	2.36224	612	557	623	578	23.7065
11	2	200	1	1.77325	580	572	582	606	34.0588
11	3	200	0.5	1.11402	641	231	625	241	18.868
11	3	300	8	3.1082	362	124	333	145	35.805
11	3	300	8	3.69966	217	436	204	450	19.105
11	3	100	4	1.48133	546	478	546	470	8
11	3	100	2	1.41035	589	320	584	316	6.40312
11	3	300	4	3.72057	252	534	246	551	18.0278
11	3	200	2	1.99762	580	572	572	590	19.6977
11	3	100	1	2.22009	414	367	397	363	17.4642
11	3	300	8	4.33103	460	89	367	78	93.6483
11	3	300	2	2.90048	362	124	333	113	31.0161
11	3	300	4	3.42523	409	666	510	389	294.839
11	3	100	1	2.55837	418	350	421	359	9.48683
11	3	100	4	3.15107	599	334	624	324	26.9258
11	3	300	1	2.65657	460	89	443	131	45.31
11	3	100	2	2.78035	448	461	443	479	18.6815
11	3	200	0.5	1.45682	709	419	688	431	24.1868
11	3	100	8	2.77375	414	367	390	373	24.7386
11	3	200	8	2.67485	444	572	389	619	72.3464
11	3	200	2	2.26277	383	231	350	239	33.9559
11	3	200	2	4.62339	477	581	512	375	208.952
11	3	200	0.5	2.43691	412	211	386	231	32.8024
11	3	200	4	3.76434	444	196	425	200	19.4165
11	3	300	1	2.3542	807	332	775	312	37.7359
11	3	300	0.5	2.30327	252	534	253	554	20.025
11	3	100	0.5	1.22248	610	367	597	355	17.6918
11	3	100	0.5	1.48221	606	350	615	331	21.0238
11	3	200	4	1.3813	700	452	656	430	49.1935
11	3	200	8	1.51059	580	572	604	586	27.7849
11	3	300	1	1.87801	362	644	373	654	14.8661
11	3	100	1	2.34797	448	307	424	316	25.632
11	4	200	8	3.85751	359	255	308	257	51.0392
11	4	300	1	2.57928	362	644	346	654	18.868
11	4	100	8	2.9101	478	290	445	308	37.5899
11	4	200	2	2.90971	324	452	328	470	18.4391
11	4	300	4	2.82968	807	436	801	449	14.3178
11	4	200	1	2.36184	324	452	317	455	7.61577
11	4	100	0.5	2.28548	599	334	596	335	3.16228
11	4	100	8	2.57399	435	448	385	478	58.3095
11	4	100	2	1.26124	576	461	589	466	13.9284
11	4	100	8	2.38069	478	478	475	513	35.1283
11	4	200	8	2.50192	641	231	654	214	21.4009
11	4	300	0.5	1.9886	460	679	463	690	11.4018
11	4	300	2	2.98866	282	191	245	221	47.634
11	4	200	1	2.86598	444	196	420	237	47.5079
11	4	300	4	2.19546	742	191	732	213	24.1661
11	4	200	4	2.56056	315	349	332	359	19.7231
11	4	100	4	1.78907	562	297	545	296	17.0294
11	4	300	0.5	1.67621	705	614	682	624	25.0799
11	4	100	4	1.91195	435	448	418	441	18.3848
11	4	300	8	2.32204	564	89	574	65	26
11	4	300	2	6.54171	409	666	430	690	31.8904
11	4	200	4	2.73277	709	349	733	355	24.7386
11	4	200	0.5	3.10263	339	284	338	281	3.16228
11	4	100	1	1.40382	418	350	415	356	6.7082
11	4	100	1	2.16806	546	478	548	492	14.1421
11	4	200	0.5	2.04016	477	581	462	578	15.2971
11	4	300	2	1.96795	319	154	322	179	25.1794
11	4	300	1	1.79814	460	89	447	100	17.0294
11	4	100	0.5	1.57804	606	418	579	425	27.8927
11	4	200	2	8.70195	477	581	397	575	80.2247
11	5	100	1	1.51163	562	297	577	311	20.5183
11	5	100	2	2.2563	462	471	446	481	18.868
11	5	300	0.5	1.40575	662	644	641	588	59.808
11	5	200	2	2.15216	709	419	647	439	65.146
11	5	300	8	3.07442	564	89	576	70	22.4722
11	5	200	4	2.03987	383	231	343	250	44.2832
11	5	100	2	2.12567	546	478	549	505	27.1662
11	5	100	4	1.33907	478	290	450	288	28.0713
11	5	200	2	3.24705	339	484	304	485	35.0143
11	5	100	4	1.61629	610	367	668	374	58.4209
11	5	200	8	2.25544	477	187	442	208	40.8167
11	5	200	4	1.75579	444	572	416	550	35.609
11	5	100	8	2.02892	478	478	447	488	32.573
11	5	200	2	2.34546	477	581	451	607	36.7696
11	5	100	1	2.27158	562	471	559	486	15.2971
11	5	300	8	2.78659	807	332	811	369	37.2156
11	5	200	8	2.8406	665	255	670	271	16.7631
11	5	100	1	1.54693	589	448	561	444	28.2843
11	5	300	0.5	4.68853	807	332	791	344	20
11	5	300	0.5	2.36327	772	234	512	384	300.167
11	5	300	1	2.06733	742	577	718	601	33.9411
11	5	200	8	1.57015	685	284	695	318	35.4401
11	5	300	4	2.20716	460	679	431	681	29.0689
11	5	300	4	1.30781	705	614	655	643	57.8014
11	5	100	2	1.97913	478	290	462	322	35.7771
11	5	300	1	1.14167	460	89	407	77	54.3415
11	5	100	0.5	1.7743	418	350	412	361	12.53
11	5	300	0.5	1.59087	662	644	624	643	38.0132
11	5	200	1	1.97433	315	349	329	357	16.1245
11	5	200	0.5	1.45352	444	572	418	571	26.0192
11	6	200	0.5	1.74097	685	484	665	476	21.5407
11	6	300	8	1.87256	282	191	258	175	28.8444
11	6	200	2	2.60692	383	231	372	218	17.0294
11	6	300	2	1.55194	615	102	632	96	18.0278
11	6	200	1	1.78695	641	537	629	548	16.2788
11	6	200	2	1.89679	641	231	623	237	18.9737
11	6	100	8	1.46144	546	290	552	317	27.6586
11	6	200	1	1.13376	412	211	388	227	28.8444
11	6	300	4	1.91115	460	89	396	87	64.0312
11	6	100	1	1.16823	576	461	574	463	2.82843
11	6	100	4	1.30378	418	418	416	412	6.32456
11	6	100	0.5	1.49393	435	448	413	464	27.2029
11	6	100	4	2.47399	610	401	583	409	28.1603
11	6	100	0.5	0.904315	562	297	556	298	6.08276
11	6	300	4	2.09729	217	332	177	345	42.0595
11	6	300	0.5	2.44041	772	234	781	240	10.8167
11	6	200	1	2.00901	383	537	373	538	10.0499
11	6	100	1	1.53947	576	461	570	466	7.81025
11	6	100	8	1.17642	448	461	452	462	4.12311
11	6	200	1	1.65924	665	255	645	281	32.8024
11	6	100	0.5	1.2211	414	367	420	375	10
11	6	300	2	1.66855	705	614	676	611	29.1548
11	6	300	2	1.55412	564	89	549	113	28.3019
11	6	300	8	1.58831	662	644	682	656	23.3238
11	6	200	8	1.70484	383	231	346	249	41.1461
11	6	200	0.5	1.48415	324	316	300	311	24.5153
11	6	100	4	0.68451	606	350	512	384	99.96
11	6	200	4	2.02906	359	255	341	261	18.9737
11	6	300	2	2.30445	615	666	594	685	28.3196
11	6	300	8	1.40928	252	234	245	250	17.4642
12	1	300	0.5	1.09512	319	614	327	614	8
12	1	300	2	2.01969	772	534	761	580	47.2969
12	1	100	1	1.61985	414	401	425	465	64.9384
12	1	300	8	1.84287	362	124	326	148	43.2666
12	1	100	2	2.68813	589	320	583	318	6.32456
12	1	200	2	1.40859	359	513	349	560	48.0521
12	1	100	1	1.9981	610	367	600	362	11.1803
12	1	200	4	2.05452	359	255	353	260	7.81025
12	1	300	8	1.41063	460	89	446	83	15.2315
12	1	100	1	1.83362	610	401	621	408	13.0384
12	1	300	4	1.44124	564	679	618	721	68.4105
12	1	200	8	2.08166	700	316	699	382	66.0076
12	1	300	1	1.76252	662	124	674	159	37
12	1	300	8	2.61145	564	679	581	727	50.9215
12	1	300	0.5	1.29246	615	666	616	707	41.0122
12	1	100	4	1.64083	576	307	605	364	63.9531
12	1	200	4	1.37652	383	537	386	605	68.0661
12	1	200	2	1.53086	315	419	338	517	100.663
12	1	200	8	1.91004	547	187	589	241	68.4105
[truncated: 881 more rows]

## Sheet: SPMS
Subject_ID	Block_Number	Distance (pixel)	Delay_Interval	Reaction_Time (seconds)	Target_location (x_axis)	Target_location (y_axis)	Subject_response (x_axis)	Subject_response (y_axis)	Response error (pixel)
1	1	200	4	2.3352	444	572	404	557	42.72
1	1	300	4	3.76012	460	679	448	657	25.0599
1	1	200	2	3.75396	709	349	703	352	6.7082
1	1	300	4	3.34779	794	487	767	493	27.6586
1	1	300	0.5	2.29962	282	577	282	595	18
1	1	300	8	2.98422	662	124	654	126	8.24621
1	1	100	1	2.2918	418	418	404	421	14.3178
1	1	200	4	3.15636	612	211	591	236	32.6497
1	1	300	8	2.48616	807	436	807	431	5
1	1	100	2	2.15771	448	461	461	445	20.6155
1	1	100	2	3.79387	414	401	413	434	33.0151
1	1	300	8	2.63041	362	644	345	606	41.6293
1	1	200	2	3.15322	339	284	268	236	85.703
1	1	100	0.5	5.08515	435	320	401	308	36.0555
1	1	300	1	4.0697	564	89	519	87	45.0444
1	1	200	1	2.54665	444	572	424	580	21.5407
1	1	200	0.5	2.81774	641	231	628	246	19.8494
1	1	100	8	2.98553	418	350	360	319	65.7647
1	1	100	4	2.20423	425	434	398	439	27.4591
1	1	100	1	2.05462	425	434	435	434	10
1	1	200	8	3.32306	641	537	659	511	31.6228
1	1	100	0.5	2.53808	610	367	606	369	4.47214
1	1	200	4	2.59584	412	211	396	192	24.8395
1	1	300	2	3.78556	230	281	194	250	47.5079
1	1	100	1	1.68506	576	461	571	447	14.8661
1	1	200	0.5	3.31859	641	537	639	535	2.82843
1	1	200	8	4.5876	641	231	649	279	48.6621
1	1	100	2	2.81763	495	482	491	465	17.4642
1	1	300	1	5.02483	564	679	590	655	35.3836
1	1	300	0.5	2.94279	252	234	206	183	68.6804
1	2	100	4	2.16138	562	471	543	463	20.6155
1	2	300	4	3.57131	362	124	293	116	69.4622
1	2	300	4	4.64265	460	679	415	658	49.6588
1	2	200	2	3.17938	665	255	658	242	14.7648
1	2	100	1	4.31794	414	401	411	423	22.2036
1	2	300	0.5	7.6682	217	436	172	456	49.2443
1	2	100	8	2.37258	462	297	404	296	58.0086
1	2	200	8	3.32137	315	349	269	327	50.9902
1	2	300	2	3.27842	362	644	359	614	30.1496
1	2	200	2	2.69783	612	211	604	209	8.24621
1	2	100	0.5	2.89006	576	461	578	458	3.60555
1	2	300	1	3.3381	662	644	675	629	19.8494
1	2	200	0.5	3.85265	547	187	538	222	36.1386
1	2	300	2	4.84079	319	614	302	650	39.8121
1	2	200	2	3.36017	709	419	689	408	22.8254
1	2	100	0.5	3.86835	529	482	541	465	20.8087
1	2	300	1	3.56399	217	332	190	315	31.9061
1	2	100	1	2.33948	462	297	423	289	39.8121
1	2	100	8	2.89738	425	434	404	436	21.095
1	2	300	0.5	4.32655	807	436	775	419	36.2353
1	2	100	1	2.26029	599	434	598	428	6.08276
1	2	200	2	5.14143	477	581	416	551	67.9779
1	2	100	0.5	2.51559	462	471	427	491	40.3113
1	2	200	8	2.34947	641	537	657	538	16.0312
1	2	200	4	2.56195	641	537	700	588	77.9872
1	2	300	8	2.78866	794	487	778	503	22.6274
1	2	300	8	4.30866	362	644	339	659	27.4591
1	2	100	4	2.29998	599	434	599	440	6
1	2	200	4	2.38383	383	231	351	205	41.2311
1	2	200	1	2.81988	412	557	392	536	29
1	3	100	4	2.50874	495	482	507	472	15.6205
1	3	300	1	2.73373	409	102	374	103	35.0143
1	3	100	1	2.27161	546	478	541	466	13
1	3	300	2	3.04487	319	614	329	648	35.4401
1	3	300	0.5	3.92633	662	644	676	667	26.9258
1	3	300	1	3.77999	615	102	619	112	10.7703
1	3	200	2	3.19696	547	187	549	215	28.0713
1	3	200	4	1.96454	612	557	633	596	44.2945
1	3	300	8	4.39365	772	234	795	228	23.7697
1	3	200	4	2.87979	359	513	322	568	66.2873
1	3	200	4	3.57268	547	581	539	561	21.5407
1	3	200	1	2.19425	383	231	375	245	16.1245
1	3	200	8	2.70462	477	581	433	617	56.8507
1	3	200	0.5	2.88428	700	316	693	312	8.06226
1	3	100	2	1.45366	478	478	478	470	8
1	3	300	8	3.28081	662	644	709	619	53.2353
1	3	100	4	2.0173	418	418	415	422	5
1	3	100	1	3.29572	448	307	425	315	24.3516
1	3	200	8	4.022	665	255	672	274	20.2485
1	3	100	2	2.41643	414	367	405	349	20.1246
1	3	300	1	5.07194	252	234	223	247	31.7805
1	3	300	0.5	6.84638	460	89	406	72	56.6127
1	3	200	8	7.81772	547	187	572	113	78.1089
1	3	200	2	2.60817	477	581	472	604	23.5372
1	3	100	2	2.10877	448	307	439	313	10.8167
1	3	300	8	3.59515	564	679	621	669	57.8705
1	3	100	0.5	2.60379	599	334	580	336	19.105
1	3	300	4	3.20747	282	191	230	198	52.469
1	3	100	0.5	2.20461	478	290	473	293	5.83095
1	3	100	0.5	2.24041	448	307	427	305	21.095
1	4	300	4	4.24556	319	614	315	625	11.7047
1	4	200	4	3.0654	685	284	661	289	24.5153
1	4	300	1	3.08178	705	154	684	176	30.4138
1	4	300	2	3.15383	742	191	727	200	17.4929
1	4	100	1	2.40461	606	418	597	414	9.84886
1	4	200	1	5.0863	339	284	327	289	13
1	4	200	0.5	3.59933	612	211	601	214	11.4018
1	4	200	8	3.97536	477	187	471	195	10
1	4	100	2	3.40181	478	290	451	297	27.8927
1	4	300	4	5.10126	409	666	382	683	31.9061
1	4	200	8	5.66769	412	211	399	231	23.8537
1	4	200	1	4.90626	641	231	643	243	12.1655
1	4	100	8	3.7858	589	448	621	453	32.3883
1	4	100	8	3.01356	425	434	444	414	27.5862
1	4	100	8	3.11671	576	307	591	312	15.8114
1	4	300	2	5.3785	564	89	545	108	26.8701
1	4	200	1	3.9787	412	557	394	606	52.2015
1	4	300	2	3.06196	282	577	324	567	43.1741
1	4	300	2	4.72757	282	577	279	606	29.1548
1	4	200	0.5	3.28849	339	284	353	294	17.2047
1	4	100	4	2.37721	435	448	430	522	74.1687
1	4	100	0.5	2.1415	418	350	433	352	15.1327
1	4	100	8	3.93336	418	418	403	421	15.2971
1	4	200	0.5	3.36673	477	581	461	585	16.4924
1	4	200	0.5	3.63903	339	484	339	515	31
1	4	300	4	5.48709	217	332	194	336	23.3452
1	4	100	2	5.83163	610	401	599	437	37.6431
1	4	100	1	2.79474	606	350	591	352	15.1327
1	4	300	0.5	6.62007	362	124	366	122	4.47214
1	4	300	4	9.64266	319	154	311	116	38.833
1	5	200	8	2.43681	339	284	297	257	49.93
1	5	100	4	2.79559	462	297	421	275	46.5296
1	5	200	2	2.7549	444	572	427	592	26.2488
1	5	300	4	2.86208	807	332	808	315	17.0294
1	5	100	1	3.03652	448	461	457	447	16.6433
1	5	200	0.5	3.29522	580	572	611	610	49.0408
1	5	300	2	3.5867	230	487	285	531	70.4344
1	5	200	0.5	3.07534	383	231	372	242	15.5563
1	5	100	0.5	3.02619	495	286	479	289	16.2788
1	5	200	8	3.92519	547	187	557	199	15.6205
1	5	300	1	8.69901	564	679	562	664	15.1327
1	5	300	1	5.71933	460	89	453	110	22.1359
1	5	100	0.5	2.27856	529	482	530	471	11.0454
1	5	200	8	4.39506	547	581	584	585	37.2156
1	5	200	8	8.61055	580	572	636	599	62.1691
1	5	300	1	7.78487	742	191	721	206	25.807
1	5	100	4	4.6736	418	350	379	338	40.8044
1	5	200	0.5	2.59276	477	187	459	180	19.3132
1	5	100	4	2.58203	435	448	429	430	18.9737
1	5	100	2	3.02637	448	461	431	468	18.3848
1	5	300	2	2.75797	217	332	209	316	17.8885
1	5	300	1	4.78247	794	487	765	476	31.0161
1	5	300	2	4.00909	705	154	724	184	35.5106
1	5	300	8	3.73244	615	666	672	682	59.203
1	5	200	8	3.70081	665	513	698	524	34.7851
1	5	100	4	2.73821	562	297	569	314	18.3848
1	5	100	0.5	3.89303	435	320	427	300	21.5407
1	5	300	4	2.93133	564	89	578	129	42.3792
1	5	100	2	1.88405	546	478	561	513	38.0789
1	5	200	1	2.3233	547	187	534	211	27.2947
1	6	300	4	2.76936	564	89	543	111	30.4138
1	6	200	1	3.35174	641	231	646	233	5.38516
1	6	300	2	5.5303	794	281	808	283	14.1421
1	6	200	1	5.7311	324	316	300	287	37.6431
1	6	100	4	3.71776	562	471	561	462	9.05539
1	6	100	0.5	2.7172	562	471	565	486	15.2971
1	6	300	0.5	3.4676	772	534	812	583	63.2535
1	6	300	8	3.09302	794	281	823	305	37.6431
1	6	200	4	2.79226	359	513	352	545	32.7567
1	6	300	2	2.52843	794	487	810	492	16.7631
1	6	300	2	4.67195	705	614	764	660	74.8131
1	6	200	1	2.75649	477	581	476	599	18.0278
1	6	300	1	2.57428	217	332	212	323	10.2956
1	6	300	1	2.02899	807	332	810	320	12.3693
1	6	100	8	2.47236	448	461	419	436	38.2884
1	6	200	1	3.05344	383	231	349	234	34.1321
1	6	200	8	3.11131	580	196	564	210	21.2603
1	6	200	2	2.40834	477	187	467	194	12.2066
1	6	100	0.5	3.21412	462	297	444	286	21.095
1	6	200	8	3.90929	641	537	683	569	52.8015
1	6	200	0.5	2.51176	700	452	695	459	8.60233
1	6	100	0.5	2.60286	606	350	599	354	8.06226
1	6	300	4	5.24681	564	89	573	93	9.84886
1	6	100	0.5	3.46852	462	471	458	478	8.06226
1	6	100	2	6.50367	529	482	509	491	21.9317
1	6	300	2	3.35708	705	614	757	659	68.7677
1	6	200	4	2.86326	324	452	290	473	39.9625
1	6	100	4	3.66224	529	482	532	476	6.7082
1	6	100	8	3.20614	546	478	566	482	20.3961
1	6	100	8	3.58628	606	350	598	329	22.4722
2	1	100	4	3.37346	562	297	527	173	128.845
2	1	200	2	3.00401	665	513	722	523	57.8705
2	1	300	4	3.59058	282	191	293	208	20.2485
2	1	200	8	2.73333	641	231	686	245	47.1275
2	1	300	8	3.55005	252	234	277	240	25.7099
2	1	200	0.5	4.47067	709	419	717	419	8
2	1	100	2	1.93851	418	418	422	427	9.84886
2	1	100	8	2.66157	478	478	426	490	53.3667
2	1	100	1	2.39676	414	401	411	435	34.1321
2	1	100	0.5	2.34929	462	297	439	299	23.0868
2	1	100	0.5	2.80417	610	367	629	363	19.4165
2	1	300	0.5	3.80133	615	102	647	108	32.5576
2	1	200	1	2.94768	477	581	478	651	70.0071
2	1	300	4	3.31372	794	487	834	556	79.7559
2	1	300	1	4.91576	794	281	821	291	28.7924
2	1	100	8	3.71184	418	350	395	339	25.4951
2	1	200	2	4.17855	700	452	752	448	52.1536
2	1	300	8	3.7864	282	577	245	637	70.4911
2	1	200	8	3.33669	665	255	670	252	5.83095
2	1	300	2	3.46604	615	102	635	109	21.1896
2	1	200	1	2.89087	359	513	324	539	43.6005
2	1	100	1	2.75511	589	320	591	329	9.21954
2	1	100	4	3.73467	606	418	634	436	33.2866
2	1	300	0.5	4.21658	409	666	379	695	41.7253
2	1	200	0.5	4.21717	641	537	650	565	29.4109
2	1	100	4	1.80112	478	290	449	297	29.8329
2	1	300	4	4.81165	564	89	571	81	10.6301
2	1	200	1	10.5552	547	187	300	370	307.405
2	1	200	2	2.26811	324	316	306	319	18.2483
2	1	300	2	3.31032	282	191	217	168	68.9493
2	2	300	2	2.99988	217	332	213	326	7.2111
2	2	300	1	4.85115	230	281	184	292	47.2969
2	2	300	1	3.19904	564	679	554	686	12.2066
2	2	100	8	2.49916	478	478	426	496	55.0273
2	2	300	0.5	3.82519	460	679	389	709	77.0779
2	2	200	8	4.01876	477	581	429	673	103.769
2	2	300	4	5.81838	252	234	149	270	109.11
2	2	200	0.5	3.29959	383	537	353	567	42.4264
2	2	100	4	3.59944	425	434	392	482	58.2495
2	2	100	2	3.96265	589	448	624	477	45.4533
2	2	100	2	2.23496	425	434	413	469	37
2	2	200	4	2.80016	339	284	335	307	23.3452
2	2	200	4	4.16461	700	316	695	317	5.09902
2	2	100	1	2.07318	576	461	596	481	28.2843
2	2	300	4	15.406	282	577	209	624	86.8217
2	2	200	2	4.19338	641	537	664	540	23.1948
2	2	200	0.5	3.18625	580	572	616	597	43.8292
2	2	300	4	2.6954	772	534	781	541	11.4018
2	2	300	8	4.49317	362	644	267	673	99.3277
2	2	100	1	1.73682	599	334	598	338	4.12311
2	2	100	8	3.83412	599	334	625	347	29.0689
2	2	200	2	2.55391	359	513	336	567	58.6941
2	2	100	2	1.66168	606	418	625	428	21.4709
2	2	200	0.5	2.09335	612	211	639	202	28.4605
2	2	200	0.5	1.79062	383	537	333	564	56.8243
2	2	200	8	1.70019	444	196	385	218	62.9682
2	2	300	0.5	2.34563	460	89	489	95	29.6142
2	2	300	8	3.08777	409	102	436	85	31.9061
2	2	100	1	1.48148	495	286	487	276	12.8062
2	2	100	1	3.04819	610	401	647	425	44.1022
2	3	200	4	2.9897	700	452	709	494	42.9535
2	3	100	1	2.95078	529	286	495	286	34
2	3	200	0.5	2.0045	580	196	598	177	26.1725
2	3	300	1	2.70398	794	487	804	501	17.2047
2	3	300	2	2.72852	217	332	166	370	63.6003
2	3	100	0.5	4.02945	562	297	538	319	32.5576
2	3	200	2	1.57491	612	211	624	211	12
2	3	300	8	3.26514	282	577	235	634	73.8783
2	3	100	4	1.87486	414	367	367	361	47.3814
2	3	100	8	2.15075	606	350	633	344	27.6586
2	3	100	1	2.36383	478	478	450	516	47.2017
2	3	300	8	2.41067	282	191	269	240	50.6952
2	3	200	2	2.52012	641	537	661	561	31.241
2	3	200	8	2.61572	580	572	628	623	70.0357
2	3	100	0.5	2.16726	610	401	620	405	10.7703
2	3	100	4	1.57282	425	334	387	364	48.4149
2	3	300	1	3.23507	564	679	590	734	60.8358
2	3	300	2	3.10102	794	487	765	507	35.2278
2	3	100	1	2.00197	495	482	451	517	56.2228
2	3	200	1	4.25122	412	557	346	605	81.6088
2	3	100	4	2.25542	529	286	547	301	23.4307
2	3	200	4	2.57225	685	484	694	499	17.4929
2	3	100	0.5	1.85259	435	448	387	485	60.6053
2	3	200	8	2.23821	477	581	412	595	66.4906
2	3	300	0.5	3.81558	230	281	190	296	42.72
2	3	300	2	2.50489	742	577	749	602	25.9615
2	3	200	2	2.15408	359	255	377	312	59.7746
2	3	200	4	3.9942	641	231	630	244	17.0294
2	3	300	8	2.24797	705	614	783	642	82.8734
2	3	300	0.5	3.22215	794	487	805	488	11.0454
2	4	300	1	1.88436	409	102	359	85	52.811
2	4	300	4	3.08743	807	436	836	476	49.4065
2	4	200	2	2.59109	324	316	270	330	55.7853
2	4	200	0.5	3.54296	477	581	406	612	77.4726
2	4	300	2	2.79706	319	154	286	143	34.7851
2	4	300	4	2.05904	362	644	326	654	37.3631
2	4	200	8	3.25281	685	284	696	297	17.0294
2	4	200	8	2.55885	580	196	601	230	39.9625
2	4	200	2	2.54431	547	581	589	609	50.4777
2	4	100	0.5	3.79238	546	290	550	294	5.65685
2	4	100	4	1.54234	435	448	418	490	45.31
2	4	300	4	2.83844	794	281	778	318	40.3113
2	4	300	1	2.01962	564	679	625	695	63.0635
2	4	200	2	3.14671	685	484	693	475	12.0416
2	4	100	1	3.55255	562	297	570	311	16.1245
2	4	100	1	2.15468	606	418	628	427	23.7697
2	4	100	0.5	2.63982	606	350	614	355	9.43398
2	4	100	0.5	1.36143	606	350	615	361	14.2127
2	4	100	8	3.34608	589	448	627	471	44.4185
2	4	300	8	2.72831	319	614	239	674	100
2	4	100	4	2.14565	606	350	611	362	13
2	4	200	1	2.15877	359	255	360	260	5.09902
2	4	300	2	2.26465	742	191	755	215	27.2947
2	4	300	8	2.88087	564	89	603	121	50.448
2	4	100	0.5	2.52545	576	461	604	462	28.0179
2	4	100	0.5	1.89079	589	320	606	325	17.72
2	4	200	4	2.6192	477	581	464	624	44.9222
2	4	200	1	1.95477	412	557	381	597	50.6063
2	4	300	8	2.74857	230	281	209	299	27.6586
2	4	200	2	2.83593	324	452	281	438	45.2217
2	5	100	8	2.28702	606	350	644	348	38.0526
2	5	300	2	2.1662	705	614	721	653	42.1545
2	5	300	4	2.47869	252	534	193	592	82.7345
2	5	200	0.5	2.39608	324	316	304	322	20.8806
2	5	200	1	2.28138	580	196	598	265	71.3092
2	5	100	2	1.49796	576	307	580	332	25.318
2	5	300	0.5	2.25681	772	234	780	243	12.0416
2	5	300	1	3.23299	217	436	164	472	64.0703
2	5	200	0.5	2.58274	641	231	646	255	24.5153
2	5	100	1	2.28127	589	448	607	472	30
2	5	200	8	2.37005	339	484	298	557	83.7257
2	5	100	2	1.88031	599	434	612	443	15.8114
2	5	300	2	2.00609	217	332	160	353	60.7454
2	5	200	2	2.05637	665	255	667	273	18.1108
2	5	200	1	2.46753	324	316	264	334	62.6418
2	5	200	4	2.5643	709	419	732	424	23.5372
2	5	300	0.5	2.18934	772	534	811	549	41.7852
2	5	300	1	3.38001	615	666	610	702	36.3456
2	5	100	0.5	2.29477	589	320	600	321	11.0454
2	5	300	4	1.86707	252	234	187	237	65.0692
2	5	200	8	1.93186	383	537	333	593	75.0733
2	5	100	8	2.35593	589	448	617	474	38.2099
2	5	200	2	1.74221	315	419	283	442	39.4081
2	5	200	8	2.70082	339	484	288	505	55.1543
2	5	300	4	2.11224	662	124	701	123	39.0128
2	5	100	8	2.33699	562	471	640	489	80.05
2	5	100	0.5	4.45295	448	307	262	478	252.66
2	5	100	4	1.92911	414	401	389	424	33.9706
2	5	300	4	2.85793	564	679	602	697	42.0476
2	5	100	1	2.16281	529	286	550	316	36.6197
2	6	100	1	1.72469	576	461	603	485	36.1248
2	6	100	2	2.25967	599	334	620	333	21.0238
2	6	100	0.5	2.55625	495	286	470	289	25.1794
2	6	200	1	2.00542	324	316	282	313	42.107
2	6	100	4	1.23463	418	350	389	356	29.6142
2	6	100	0.5	1.29886	414	367	384	354	32.6956
2	6	300	0.5	1.95269	460	89	459	135	46.0109
2	6	200	0.5	2.26306	339	284	323	283	16.0312
2	6	100	8	1.86859	425	434	416	444	13.4536
2	6	300	0.5	3.01955	772	534	786	524	17.2047
2	6	100	4	3.41152	610	401	635	413	27.7308
2	6	300	8	2.54698	807	332	771	356	43.2666
2	6	200	8	1.99885	339	284	341	262	22.0907
2	6	300	8	2.42563	319	614	273	659	64.3506
2	6	200	4	2.12536	359	255	361	285	30.0666
2	6	200	2	1.6586	359	255	366	288	33.7343
2	6	200	4	2.2763	339	484	300	517	51.0882
2	6	100	2	1.83089	529	286	544	303	22.6716
2	6	100	1	4.36168	599	334	585	358	27.7849
2	6	300	8	3.76401	230	487	149	535	94.1541
2	6	200	2	2.94641	547	581	539	606	26.2488
2	6	300	1	2.6713	319	154	270	133	53.3104
2	6	200	8	2.44335	580	572	622	604	52.8015
2	6	300	2	1.62731	615	666	626	708	43.4166
2	6	300	0.5	5.34688	282	191	194	234	97.9439
2	6	300	4	2.93392	362	644	294	672	73.5391
2	6	100	1	2.16749	414	367	399	373	16.1555
2	6	200	1	2.76583	412	557	393	566	21.0238
2	6	300	4	1.98797	282	191	290	232	41.7732
2	6	200	2	1.8186	709	419	707	449	30.0666
3	1	200	8	8.66882	665	255	676	268	17.0294
3	1	100	0.5	1.851	562	471	568	463	10
3	1	300	8	7.85421	772	534	767	558	24.5153
3	1	200	0.5	4.24476	580	572	518	385	197.01
3	1	100	8	4.73214	425	334	605	579	304.015
3	1	200	1	9.21451	359	255	483	380	176.071
3	1	300	8	4.53956	807	332	842	340	35.9026
3	1	300	0.5	3.45096	564	89	526	138	62.0081
3	1	300	1	2.37689	230	487	265	485	35.0571
3	1	100	4	4.73863	418	418	423	424	7.81025
3	1	300	4	3.58803	362	644	427	647	65.0692
3	1	200	8	1.61694	665	513	702	391	127.487
3	1	200	0.5	3.32979	359	513	401	451	74.8866
3	1	300	2	2.98709	282	191	264	249	60.7289
3	1	100	1	3.9472	435	448	443	441	10.6301
3	1	300	1	9.26514	807	332	752	381	73.6614
3	1	200	4	6.11314	580	572	653	508	97.0824
3	1	300	2	4.40908	409	666	457	668	48.0416
3	1	100	8	5.39723	576	307	574	335	28.0713
3	1	300	4	4.52157	282	577	300	600	29.2062
3	1	200	2	4.46421	665	513	704	558	59.5483
3	1	100	2	1.7051	425	434	432	476	42.5793
3	1	100	0.5	2.16249	448	307	445	328	21.2132
3	1	100	2	4.3494	576	461	567	456	10.2956
3	1	100	2	4.52248	414	401	430	418	23.3452
3	1	200	1	2.22371	315	349	343	376	38.8973
3	1	200	0.5	4.54826	580	196	570	245	50.01
3	1	200	4	4.20347	685	484	708	522	44.4185
3	1	100	4	2.57264	529	482	553	490	25.2982
3	1	300	1	2.33864	282	191	278	232	41.1947
3	2	100	1	9.94392	448	307	546	446	170.074
3	2	300	2	3.95583	807	436	763	425	45.3542
3	2	300	4	3.36551	705	154	719	205	52.8867
3	2	200	8	2.59489	665	255	620	313	73.4098
3	2	200	4	3.1228	685	484	770	487	85.0529
3	2	100	0.5	2.73645	478	290	490	316	28.6356
3	2	200	2	3.35397	547	581	558	607	28.2312
3	2	300	4	4.84382	460	679	529	612	96.1769
3	2	100	1	4.52346	599	434	625	446	28.6356
3	2	100	1	3.90572	589	448	664	468	77.6209
3	2	100	1	2.04992	599	334	623	340	24.7386
3	2	200	0.5	1.92898	359	513	382	485	36.2353
3	2	300	4	4.86603	615	102	633	140	42.0476
3	2	200	2	3.01042	412	211	442	262	59.1692
3	2	200	2	2.90532	612	557	628	555	16.1245
3	2	100	8	2.29079	546	290	582	294	36.2215
3	2	200	4	3.46639	580	196	612	208	34.176
3	2	200	8	5.35331	685	284	763	256	82.8734
3	2	100	0.5	5.09421	589	320	637	329	48.8365
3	2	300	0.5	2.78022	460	679	502	708	51.0392
3	2	100	4	3.13661	599	334	662	355	66.4078
3	2	300	8	2.79156	460	89	439	95	21.8403
3	2	100	2	2.69581	448	461	492	447	46.1736
3	2	300	8	10.7627	362	644	374	713	70.0357
3	2	200	8	2.73289	359	513	439	535	82.9699
3	2	100	0.5	3.76827	546	478	540	483	7.81025
3	2	300	1	6.19175	252	234	316	319	106.4
3	2	300	2	6.48669	564	89	577	164	76.1183
3	2	300	1	3.28484	772	234	847	257	78.4474
3	2	200	0.5	2.05782	315	349	368	382	62.434
3	3	300	4	9.64149	564	89	522	412	325.719
3	3	200	1	4.8798	641	231	620	215	26.4008
3	3	300	2	3.69994	794	281	816	296	26.6271
3	3	200	1	5.56106	324	316	381	307	57.7062
3	3	100	4	2.64354	562	471	593	467	31.257
3	3	100	0.5	1.6292	562	471	577	468	15.2971
3	3	300	0.5	2.18616	772	534	772	577	43
3	3	300	8	1.97281	794	281	834	324	58.7282
3	3	200	4	3.37122	359	513	401	538	48.8774
3	3	300	2	2.71383	794	487	789	529	42.2966
3	3	300	2	3.30597	705	614	747	636	47.4131
3	3	200	1	2.09842	477	581	489	628	48.5077
3	3	300	1	2.52735	217	332	249	373	52.0096
3	3	300	1	2.66147	807	332	767	360	48.8262
3	3	100	8	2.74039	448	461	485	482	42.5441
3	3	200	1	3.12229	383	231	389	250	19.9249
3	3	200	8	2.34557	580	196	612	223	41.8688
3	3	200	2	2.85398	477	187	496	143	47.927
3	3	100	0.5	2.07516	462	297	452	307	14.1421
3	3	200	8	2.8885	641	537	689	618	94.1541
3	3	200	0.5	7.40255	700	452	558	441	142.425
3	3	100	0.5	4.33037	606	350	579	371	34.2053
3	3	300	4	3.95582	564	89	562	141	52.0384
3	3	100	0.5	1.60761	462	471	452	535	64.7765
3	3	100	2	4.88339	529	482	535	494	13.4164
3	3	300	2	3.9885	705	614	690	659	47.4342
3	3	200	4	1.8594	324	452	335	474	24.5967
3	3	100	4	1.74819	529	482	533	506	24.3311
3	3	100	8	4.03121	546	478	539	512	34.7131
3	3	100	8	4.87439	606	350	626	356	20.8806
3	4	200	0.5	3.99691	383	537	392	483	54.7449
3	4	100	1	2.1407	599	434	596	437	4.24264
3	4	100	0.5	1.18724	606	350	581	365	29.1548
3	4	100	0.5	2.17219	599	434	601	439	5.38516
3	4	300	2	1.91458	794	487	778	492	16.7631
3	4	200	1	3.74809	339	484	373	489	34.3657
3	4	200	4	2.56939	315	349	337	381	38.833
3	4	100	2	3.28014	448	307	435	369	63.3482
3	4	300	1	2.42758	460	679	509	697	52.2015
3	4	300	4	2.63907	794	281	753	348	78.5493
3	4	300	4	2.07846	705	154	655	229	90.1388
3	4	100	2	3.64371	562	471	550	418	54.3415
3	4	100	0.5	2.6938	448	461	464	437	28.8444
3	4	200	2	2.57044	547	581	548	557	24.0208
3	4	100	0.5	7.08135	606	418	583	428	25.0799
3	4	200	8	1.39447	641	231	658	249	24.7588
3	4	200	8	4.70517	580	572	659	634	100.424
3	4	100	0.5	14.4749	478	478	506	557	83.8153
3	4	200	8	3.12648	412	211	396	251	43.0813
3	4	200	1	12.2919	359	513	353	473	40.4475
3	4	100	1	3.0063	448	461	447	463	2.23607
3	4	300	8	5.39267	742	577	280	416	489.249
3	4	300	8	5.82943	772	534	786	619	86.1452
3	4	300	2	2.33652	362	124	361	170	46.0109
3	4	300	4	3.62834	772	534	753	543	21.0238
3	4	100	2	6.29419	478	478	488	443	36.4005
3	4	300	4	3.92424	252	534	307	526	55.5788
3	4	300	1	6.25605	460	679	474	636	45.2217
3	4	200	8	2.53177	477	581	499	610	36.4005
3	4	200	4	2.82899	315	419	318	423	5
3	5	200	4	38.3993	359	513	303	274	245.473
3	5	200	2	2.49648	315	349	312	372	23.1948
3	5	200	1	2.78127	359	513	398	479	51.7397
3	5	200	1	4.58392	547	581	441	519	122.801
3	5	100	1	4.2101	562	471	555	468	7.61577
3	5	100	0.5	1.76463	546	290	547	288	2.23607
3	5	300	4	0.018934	564	679	502	494	195.113
3	5	300	8	2.37639	564	679	604	689	41.2311
3	5	300	2	5.04397	794	281	758	317	50.9117
3	5	100	1	3.94713	448	461	479	470	32.28
3	5	300	2	2.71218	662	124	682	151	33.6006
3	5	300	2	2.72125	772	234	836	246	65.1153
3	5	100	4	7.81568	435	320	333	436	154.467
3	5	200	8	2.23815	412	211	476	232	67.3573
3	5	200	0.5	2.14536	444	572	438	582	11.6619
3	5	200	2	2.67759	612	557	637	647	93.4077
3	5	100	2	14.5688	610	401	524	415	87.1321
3	5	200	0.5	5.96125	383	537	400	541	17.4642
3	5	300	0.5	3.66852	615	666	43	227	721.044
3	5	100	4	8.90026	435	320	528	683	374.724
3	5	200	4	7.52877	339	284	330	306	23.7697
3	5	300	0.5	2.00528	217	436	223	436	6
3	5	200	8	3.44918	665	513	653	589	76.9415
3	5	300	8	4.65031	362	124	334	139	31.7648
3	5	100	8	2.23804	529	482	514	473	17.4929
3	5	100	8	4.6225	599	434	639	520	94.8472
3	5	100	0.5	2.50003	414	401	400	413	18.4391
3	5	300	1	2.07258	217	332	199	361	34.1321
3	5	300	1	2.22128	460	679	493	713	47.3814
3	5	100	4	7.15575	546	478	481	455	68.9493
3	6	100	4	21.849	576	461	828	270	316.204
3	6	200	0.5	3.16695	383	231	350	264	46.669
3	6	200	4	6.90839	685	484	708	534	55.0364
3	6	200	8	6.72498	612	557	529	585	87.5957
3	6	100	1	3.41951	425	434	435	429	11.1803
3	6	300	2	8.12923	705	614	704	621	7.07107
3	6	100	4	2.51458	414	367	388	361	26.6833
3	6	200	2	2.61258	612	211	587	188	33.9706
3	6	300	8	2.04355	362	124	334	85	48.0104
3	6	100	1	2.76357	610	401	580	428	40.3609
3	6	100	8	3.1051	599	334	632	323	34.7851
3	6	300	0.5	2.28449	252	234	247	244	11.1803
3	6	300	2	9.22115	282	577	285	640	63.0714
3	6	100	0.5	2.15655	576	461	536	473	41.7612
3	6	100	8	3.67156	478	478	480	489	11.1803
3	6	200	1	5.69321	547	187	501	183	46.1736
3	6	200	2	2.17621	641	231	633	243	14.4222
3	6	100	8	8.10663	610	401	618	434	33.9559
3	6	200	4	4.02776	685	484	704	547	65.8027
3	6	300	0.5	3.89022	772	234	721	288	74.2765
3	6	100	0.5	1.7151	606	350	571	367	38.9102
3	6	200	8	10.8842	412	557	392	605	52
3	6	300	0.5	2.66133	662	124	619	135	44.3847
3	6	300	2	4.98258	615	666	677	703	72.2011
3	6	300	2	8.60868	615	666	665	714	69.3109
3	6	100	1	2.10065	462	471	481	443	33.8378
3	6	300	1	4.07381	662	644	674	675	33.2415
3	6	200	4	6.01404	383	537	435	535	52.0384
3	6	300	1	2.77969	615	102	587	172	75.3923
3	6	200	4	2.87688	641	231	599	230	42.0119
4	1	100	2	1.36755	546	290	525	334	48.7545
4	1	100	0.5	5.26053	576	307	546	328	36.6197
4	1	300	4	4.65392	772	234	680	305	116.211
4	1	200	1	5.9125	339	284	731	241	394.351
4	1	100	2	6.3699	529	286	523	303	18.0278
4	1	200	8	7.76047	412	211	421	316	105.385
4	1	300	8	6.0183	319	154	382	212	85.6329
4	1	300	0.5	7.76254	742	191	734	286	95.3362
4	1	100	0.5	6.10208	589	320	600	331	15.5563
4	1	200	2	3.75554	612	557	605	528	29.8329
4	1	100	2	4.42842	599	434	578	454	29
4	1	200	1	3.08065	339	484	372	489	33.3766
4	1	300	8	4.04796	807	332	669	370	143.136
4	1	300	8	4.54796	409	102	407	161	59.0339
4	1	200	8	3.60068	444	196	414	150	54.9181
4	1	200	4	3.7169	444	196	409	208	37
4	1	200	4	3.92189	383	537	465	572	89.1572
4	1	200	1	3.53537	700	452	681	461	21.0238
4	1	300	1	2.35943	319	614	505	403	281.277
4	1	300	1	6.56141	807	436	747	450	61.6117
4	1	200	0.5	2.85324	383	231	393	236	11.1803
4	1	100	0.5	2.38766	462	471	463	460	11.0454
4	1	100	1	3.33941	435	448	447	420	30.4631
4	1	100	8	4.25528	589	320	499	345	93.4077
4	1	100	4	2.93107	425	434	453	410	36.8782
4	1	100	4	3.59885	418	350	430	345	13
4	1	300	2	3.61541	319	154	312	148	9.21954
4	1	200	2	4.08092	339	484	402	487	63.0714
4	1	300	4	4.29555	319	154	297	151	22.2036
4	1	300	0.5	4.79752	252	534	224	630	100
4	2	300	1	3.51948	409	666	437	681	31.7648
4	2	200	1	3.32477	339	284	346	280	8.06226
4	2	300	4	3.83281	217	436	253	405	47.5079
4	2	300	8	3.76591	662	644	749	635	87.4643
4	2	200	4	2.7465	324	316	380	361	71.8401
4	2	100	1	1.40085	495	286	491	294	8.94427
4	2	300	0.5	2.9187	282	577	296	591	19.799
4	2	200	2	2.37892	339	484	390	477	51.4782
4	2	100	0.5	3.24716	462	297	439	321	33.2415
4	2	200	8	2.68385	612	211	540	286	103.966
4	2	100	1	3.05885	448	307	443	347	40.3113
4	2	200	0.5	2.18594	412	211	419	216	8.60233
4	2	200	4	3.66803	685	284	602	311	87.2812
4	2	300	1	3.40346	564	89	565	84	5.09902
4	2	100	8	2.9421	414	367	440	394	37.4833
4	2	200	2	3.54853	641	231	615	302	75.6108
4	2	200	8	4.0503	547	187	503	264	88.6848
4	2	300	0.5	3.39908	564	679	563	659	20.025
4	2	200	4	2.93901	383	537	413	558	36.6197
4	2	300	0.5	2.67741	362	124	337	121	25.1794
4	2	300	4	4.81149	705	154	648	168	58.6941
4	2	100	2	3.98554	576	307	568	323	17.8885
4	2	200	8	3.94039	339	484	327	419	66.0984
4	2	300	8	2.906	362	124	329	205	87.4643
4	2	300	1	4.20382	705	154	730	157	25.1794
4	2	100	2	3.51627	418	418	433	425	16.5529
4	2	100	4	3.43525	425	434	433	411	24.3516
4	2	100	2	2.61749	418	418	454	422	36.2215
4	2	100	2	3.36105	529	286	514	310	28.3019
4	2	100	0.5	2.21376	435	320	444	337	19.2354
4	3	300	4	3.06809	794	487	762	491	32.249
4	3	200	0.5	3.39763	641	231	632	264	34.2053
4	3	300	8	4.29288	217	436	329	446	112.446
4	3	100	4	4.283	414	401	427	438	39.2173
4	3	100	1	3.40106	448	307	392	341	65.5134
4	3	200	4	2.06174	709	349	663	378	54.3783
4	3	200	8	2.88431	685	284	675	329	46.0977
4	3	200	2	0.788935	547	581	581	608	43.4166
4	3	100	2	1.48309	462	297	454	297	8
4	3	200	2	4.25209	383	537	423	514	46.1411
4	3	300	8	3.27128	705	614	703	585	29.0689
4	3	300	2	2.46757	362	124	333	129	29.4279
4	3	200	1	3.20473	685	484	697	597	113.635
4	3	100	1	1.77465	546	290	561	292	15.1327
4	3	200	8	4.62871	700	316	623	365	91.2688
4	3	300	4	4.56934	662	124	671	160	37.108
4	3	200	8	2.85482	547	581	533	619	40.4969
4	3	100	4	3.16234	562	471	570	493	23.4094
4	3	100	1	3.14775	610	401	578	433	45.2548
4	3	200	1	4.3139	700	316	704	306	10.7703
4	3	100	2	2.71531	414	401	418	398	5
4	3	100	0.5	3.97354	610	367	566	388	48.7545
4	3	300	0.5	6.35097	230	487	218	508	24.1868
4	3	300	8	6.67635	282	191	246	223	48.1664
4	3	300	0.5	3.09871	742	577	757	603	30.0167
4	3	200	0.5	4.32891	324	316	304	292	31.241
4	3	300	0.5	6.44319	615	102	649	102	34
4	3	300	1	3.93926	217	436	288	457	74.0405
4	3	100	4	1.64034	529	286	512	287	17.0294
4	3	100	2	1.73794	610	401	572	429	47.2017
4	4	300	4	3.3135	409	102	404	106	6.40312
4	4	100	0.5	3.73402	589	448	582	470	23.0868
4	4	100	8	1.51691	462	471	456	447	24.7386
4	4	200	2	3.16314	641	537	612	504	43.9318
4	4	300	1	3.10675	564	89	533	81	32.0156
4	4	200	4	6.12971	709	419	633	412	76.3217
4	4	300	1	4.29197	460	89	465	55	34.3657
4	4	100	8	3.53899	435	448	440	414	34.3657
4	4	100	8	2.92429	529	286	528	309	23.0217
4	4	200	4	4.21741	641	231	603	200	49.0408
4	4	300	1	5.75296	564	89	553	95	12.53
4	4	100	0.5	4.52441	610	367	586	385	30
4	4	200	8	3.3537	412	557	423	507	51.1957
4	4	100	0.5	2.03975	462	471	450	466	13
4	4	100	2	3.14899	610	401	605	425	24.5153
4	4	300	2	2.20265	230	487	293	476	63.9531
4	4	200	8	2.96538	315	419	349	387	46.6905
4	4	300	1	4.76487	409	102	379	140	48.4149
4	4	300	1	2.41098	615	666	615	687	21
4	4	200	4	32.8813	324	452	323	428	24.0208
4	4	300	2	3.44566	319	154	264	138	57.28
4	4	300	4	4.2084	772	234	696	253	78.339
4	4	100	2	4.29995	562	297	585	284	26.4197
4	4	100	0.5	3.35125	546	478	539	493	16.5529
4	4	300	2	4.62352	362	124	378	211	88.459
4	4	200	0.5	4.06325	641	537	643	595	58.0345
4	4	200	4	6.67753	685	284	605	302	82
4	4	100	0.5	1.69095	414	401	408	423	22.8035
4	4	200	1	2.51604	324	316	339	334	23.4307
4	4	200	8	1.86616	412	211	383	277	72.0902
4	5	300	4	2.36852	794	487	703	450	98.2344
4	5	200	0.5	5.30012	641	231	679	268	53.0377
4	5	300	8	3.01626	217	436	348	426	131.381
4	5	100	4	10.0644	414	401	356	373	64.405
4	5	100	1	2.19168	448	307	438	317	14.1421
4	5	200	4	5.29447	709	349	679	339	31.6228
4	5	200	8	2.31432	685	284	656	268	33.121
4	5	200	2	3.77943	547	581	538	557	25.632
4	5	100	2	2.62346	462	297	455	294	7.61577
4	5	200	2	2.88967	383	537	401	520	24.7588
4	5	300	8	3.04272	705	614	697	584	31.0483
4	5	300	2	3.47409	362	124	342	115	21.9317
4	5	200	1	3.00551	685	484	656	537	60.4152
4	5	100	1	2.41653	546	290	515	279	32.8938
4	5	200	8	4.27241	700	316	576	305	124.487
4	5	300	4	3.52445	662	124	641	94	36.6197
4	5	200	8	3.27372	547	581	536	659	78.7718
4	5	100	4	3.20719	562	471	545	439	36.2353
4	5	100	1	2.29582	610	401	602	414	15.2643
4	5	200	1	2.8378	700	316	652	307	48.8365
4	5	100	2	2.74043	414	401	378	431	46.8615
4	5	100	0.5	1.57339	610	367	597	361	14.3178
4	5	300	0.5	5.90897	230	487	234	487	4
4	5	300	8	3.22267	282	191	326	287	105.603
4	5	300	0.5	3.91421	742	577	724	615	42.0476
4	5	200	0.5	2.75898	324	316	327	325	9.48683
4	5	300	0.5	4.45017	615	102	579	143	54.5619
4	5	300	1	14.1741	217	436	577	336	373.631
4	5	100	4	2.49055	529	286	500	291	29.4279
4	5	100	2	1.68406	610	401	557	386	55.0818
4	6	100	4	11.8381	606	350	495	385	116.387
4	6	200	0.5	1.38265	324	452	356	460	32.9848
4	6	200	4	7.21709	412	557	411	555	2.23607
4	6	200	0.5	1.71658	444	572	475	564	32.0156
4	6	300	1	2.24024	564	89	525	110	44.2945
4	6	100	2	1.83911	562	297	539	298	23.0217
4	6	300	8	3.35224	772	234	645	276	133.765
4	6	100	8	3.76034	562	297	557	300	5.83095
4	6	300	1	3.5703	252	234	234	222	21.6333
4	6	200	0.5	2.58727	665	513	645	564	54.7814
4	6	200	4	2.10517	477	187	451	224	45.2217
4	6	300	0.5	3.44634	662	644	610	615	59.5399
4	6	100	8	3.25798	606	350	539	292	88.6172
4	6	100	8	2.76854	589	448	548	442	41.4367
4	6	100	8	5.64572	606	350	575	286	71.1126
4	6	300	1	3.32956	772	534	697	527	75.326
4	6	200	1	3.06749	383	537	390	556	20.2485
4	6	100	4	3.89893	448	461	457	494	34.2053
4	6	300	2	3.55969	362	124	367	158	34.3657
4	6	200	2	2.94598	324	452	342	420	36.7151
4	6	100	4	5.7515	478	478	473	461	17.72
4	6	200	2	15.297	383	231	396	212	23.0217
4	6	300	2	6.92632	742	577	650	525	105.679
4	6	100	0.5	2.77307	425	434	425	450	16
4	6	200	1	3.56255	700	316	673	298	32.45
4	6	200	8	2.93509	383	231	374	262	32.28
4	6	100	0.5	2.07276	418	418	396	412	22.8035
4	6	300	1	5.4439	230	281	281	368	100.846
4	6	300	4	5.46802	319	614	307	563	52.3927
4	6	300	2	3.92482	217	436	508	381	296.152
5	1	100	2	1.81168	418	418	427	426	12.0416
5	1	200	1	2.40212	685	284	710	268	29.6816
5	1	100	0.5	1.87911	414	401	433	401	19
5	1	200	1	1.89826	477	581	473	559	22.3607
5	1	100	0.5	1.12224	462	471	469	477	9.21954
5	1	300	2	2.03197	794	487	812	487	18
5	1	300	8	4.60147	772	234	807	211	41.8808
5	1	300	8	1.94954	282	577	335	568	53.7587
5	1	200	4	1.85231	612	557	594	513	47.5395
5	1	200	1	3.90255	580	196	597	152	47.1699
5	1	200	4	1.89192	315	419	329	393	29.5296
5	1	200	0.5	2.08616	339	484	345	467	18.0278
5	1	300	8	1.99734	362	124	390	89	44.8219
5	1	300	8	2.2051	742	577	716	565	28.6356
5	1	300	4	2.13547	362	644	386	637	25
5	1	100	0.5	3.3628	495	286	495	298	12
5	1	100	8	2.03216	562	471	587	492	32.6497
5	1	300	2	2.15718	742	577	731	595	21.095
5	1	300	0.5	1.8981	319	154	324	142	13
5	1	100	1	1.54854	418	418	438	418	20
5	1	200	8	2.16423	700	316	645	321	55.2268
5	1	100	1	1.84159	562	471	572	487	18.868
5	1	200	4	1.41744	580	572	592	564	14.4222
5	1	300	1	3.99985	807	332	797	336	10.7703
5	1	300	4	1.45064	564	679	548	667	20
5	1	100	0.5	2.28873	589	320	571	331	21.095
5	1	100	2	1.14456	562	471	569	477	9.21954
5	1	200	2	2.38452	412	557	422	509	49.0306
5	1	100	4	1.6342	462	471	461	459	12.0416
5	1	200	2	2.40829	339	284	366	263	34.2053
5	2	300	4	1.54031	362	124	308	95	61.2944
5	2	300	8	2.11435	282	191	318	208	39.8121
5	2	200	1	2.74618	444	196	425	217	28.3196
5	2	200	2	1.74357	339	484	369	453	43.1393
5	2	200	1	1.92674	685	484	649	475	37.108
5	2	100	0.5	1.80568	462	471	475	463	15.2643
5	2	300	4	0.559485	460	679	472	466	213.338
5	2	300	1	3.03614	409	666	399	686	22.3607
5	2	300	0.5	1.67578	705	614	679	612	26.0768
5	2	200	8	2.17559	700	316	673	302	30.4138
5	2	100	1	2.10706	478	290	479	288	2.23607
5	2	100	8	1.56393	562	297	563	289	8.06226
5	2	200	0.5	1.95517	412	211	440	209	28.0713
5	2	300	2	1.70892	772	534	726	548	48.0833
5	2	200	0.5	1.98545	477	581	474	581	3
5	2	200	2	1.83464	665	255	637	241	31.305
5	2	300	2	1.83454	662	124	656	92	32.5576
5	2	100	2	2.82665	606	350	624	288	64.56
5	2	300	0.5	2.50316	564	89	561	76	13.3417
5	2	200	4	1.56538	641	231	630	216	18.6011
5	2	200	1	1.53959	383	231	412	249	34.1321
5	2	300	4	3.14399	705	614	686	580	38.9487
5	2	100	8	1.40684	562	471	569	456	16.5529
5	2	200	8	2.00912	444	572	447	528	44.1022
5	2	100	4	1.97248	610	367	599	345	24.5967
5	2	300	4	1.80934	564	679	594	662	34.4819
5	2	100	8	2.32396	576	461	576	468	7
5	2	100	1	1.96932	610	367	600	364	10.4403
5	2	100	2	1.80087	529	482	535	467	16.1555
5	2	100	0.5	1.61357	418	418	424	426	10
5	3	200	8	1.96536	580	572	633	595	57.7754
5	3	300	4	2.12486	794	281	810	239	44.9444
5	3	100	8	1.67401	462	297	509	251	65.7647
5	3	200	0.5	1.35905	477	187	494	221	38.0132
5	3	200	8	1.89003	641	231	575	214	68.1542
5	3	200	0.5	1.59624	665	513	644	505	22.4722
5	3	300	0.5	1.85334	362	124	385	172	53.2259
5	3	100	1	1.62525	462	471	467	486	15.8114
5	3	200	1	1.19656	477	581	480	546	35.1283
5	3	200	4	1.95467	383	537	411	532	28.4429
5	3	100	4	1.66084	448	307	437	272	36.6879
5	3	100	0.5	1.43022	414	367	403	378	15.5563
5	3	300	4	2.66553	319	614	284	558	66.0379
5	3	100	4	1.67506	495	286	483	268	21.6333
5	3	200	1	12.7101	641	231	635	264	33.541
5	3	100	8	2.99986	576	461	562	445	21.2603
5	3	300	8	2.90574	807	332	814	368	36.6742
5	3	300	2	1.78754	217	436	287	394	81.6333
5	3	300	2	1.56085	252	234	270	246	21.6333
5	3	200	8	1.90673	324	452	313	403	50.2195
5	3	200	2	1.54978	412	557	416	543	14.5602
5	3	100	2	1.80975	546	290	560	291	14.0357
5	3	200	0.5	1.72269	412	211	456	228	47.1699
5	3	100	2	1.92792	462	471	464	469	2.82843
5	3	300	4	2.48151	615	102	577	125	44.4185
5	3	100	1	1.5465	546	478	562	472	17.088
5	3	300	1	2.12791	282	191	331	170	53.3104
5	3	300	2	1.68279	662	124	609	123	53.0094
5	3	300	0.5	1.71612	662	124	696	108	37.5766
5	3	100	1	2.30676	462	471	435	475	27.2947
5	4	300	8	1.8237	615	102	625	88	17.2047
5	4	200	2	2.28069	580	572	572	531	41.7732
5	4	200	8	1.67423	359	513	357	490	23.0868
5	4	300	4	1.90262	217	436	253	447	37.6431
5	4	300	2	2.13111	772	234	716	290	79.196
5	4	200	8	1.53276	383	537	384	502	35.0143
5	4	100	2	1.73322	529	286	529	303	17
5	4	200	0.5	1.95431	383	537	417	505	46.6905
5	4	200	1	2.6911	383	231	422	214	42.5441
5	4	300	2	1.61172	662	644	637	651	25.9615
5	4	300	4	1.73036	705	614	668	673	69.6419
5	4	100	1	2.18893	478	478	486	459	20.6155
5	4	100	0.5	1.89385	576	307	577	298	9.05539
5	4	300	8	2.26664	807	436	784	425	25.4951
5	4	200	1	2.57182	477	187	479	186	2.23607
5	4	300	0.5	1.71861	362	124	407	113	46.3249
5	4	100	1	1.85113	495	286	487	257	30.0832
5	4	200	2	1.06447	412	211	434	226	26.6271
5	4	100	4	1.03132	610	367	606	416	49.163
5	4	100	0.5	1.70843	589	320	631	298	47.4131
5	4	300	8	1.64547	319	614	335	615	16.0312
5	4	100	4	1.77024	495	482	472	455	35.4683
5	4	100	1	1.59986	546	290	576	241	57.4543
5	4	100	1	3.22708	576	307	580	304	5
5	4	100	0.5	2.09615	562	471	583	492	29.6985
5	4	200	0.5	1.37468	665	255	605	283	66.2118
5	4	200	8	2.12479	547	187	564	151	39.8121
5	4	300	4	4.03551	282	577	309	550	38.1838
5	4	200	4	3.95427	547	581	519	575	28.6356
5	4	300	2	3.48466	282	191	197	129	105.209
5	5	300	0.5	1.78013	705	614	686	652	42.4853
5	5	300	1	2.21384	252	234	176	216	78.1025
5	5	300	8	1.69424	794	281	801	227	54.4518
5	5	200	8	1.80122	315	349	295	342	21.1896
5	5	200	2	1.89462	412	557	361	541	53.4509
5	5	300	8	3.11372	282	191	231	176	53.1601
5	5	200	8	2.92232	315	349	290	390	48.0208
5	5	300	4	3.49718	282	577	524	399	300.413
5	5	100	2	1.51646	576	461	584	486	26.2488
5	5	300	4	3.16994	252	234	233	202	37.2156
5	5	100	4	1.68822	435	448	415	448	20
5	5	100	2	2.49722	448	461	483	468	35.6931
5	5	100	0.5	1.16083	589	320	599	321	10.0499
5	5	200	0.5	1.01918	612	211	591	251	45.1774
5	5	100	8	2.18714	599	334	596	325	9.48683
5	5	200	2	1.61658	324	452	369	440	46.5725
5	5	200	0.5	2.31465	339	484	334	458	26.4764
5	5	200	1	3.17154	709	349	695	310	41.4367
5	5	100	2	1.72038	576	307	609	266	52.6308
5	5	200	1	3.07776	580	196	608	133	68.942
5	5	200	0.5	1.49372	580	196	572	188	11.3137
5	5	300	4	1.55345	794	281	785	247	35.171
5	5	300	4	1.77899	217	436	243	369	71.8679
5	5	100	1	1.71812	606	350	589	357	18.3848
5	5	200	1	4.15475	412	557	475	561	63.1269
5	5	300	8	2.4216	230	487	212	473	22.8035
5	5	100	1	1.93594	478	290	471	308	19.3132
5	5	300	0.5	2.92409	662	124	642	120	20.3961
5	5	100	4	3.8655	589	448	641	454	52.345
5	5	100	2	1.17905	562	471	570	458	15.2643
5	6	200	0.5	2.09416	324	452	315	476	25.632
5	6	100	8	1.6749	414	401	412	436	35.0571
5	6	100	0.5	1.33734	529	482	531	510	28.0713
5	6	200	8	3.04334	477	187	484	270	83.2947
5	6	300	1	2.69101	662	124	673	113	15.5563
5	6	200	4	1.66617	412	557	466	544	55.5428
5	6	200	0.5	1.86009	477	581	498	605	31.8904
5	6	100	2	2.00447	435	448	426	455	11.4018
5	6	300	0.5	3.33033	217	332	152	295	74.793
5	6	100	4	2.01954	576	461	595	454	20.2485
5	6	300	1	2.22726	460	89	471	85	11.7047
5	6	300	4	1.5341	362	124	405	88	56.0803
5	6	100	1	1.82316	546	290	552	275	16.1555
5	6	300	1	2.01139	615	666	614	719	53.0094
5	6	300	4	1.41046	772	234	773	251	17.0294
5	6	300	8	1.79224	217	436	241	419	29.4109
5	6	300	2	2.1689	460	679	466	707	28.6356
5	6	100	2	1.82225	599	434	572	471	45.8039
5	6	200	8	1.20053	315	419	380	393	70.0071
5	6	300	2	2.22054	362	124	396	70	63.8122
5	6	100	0.5	1.27675	495	482	485	490	12.8062
5	6	200	4	1.80227	709	349	683	348	26.0192
5	6	100	0.5	1.82285	606	418	595	409	14.2127
5	6	200	4	1.81038	315	419	376	394	65.9242
5	6	200	8	1.57615	665	255	641	235	31.241
5	6	100	1	1.44333	589	448	584	439	10.2956
5	6	300	2	1.3544	705	614	696	631	19.2354
5	6	200	8	1.44419	685	484	602	613	153.395
5	6	200	1	1.50798	315	349	343	335	31.305
5	6	100	2	1.709	606	418	610	412	7.2111
6	1	100	2	2.98306	610	401	543	441	78.032
6	1	300	2	2.62716	282	191	610	393	385.212
6	1	100	0.5	2.95265	562	297	317	232	253.476
6	1	200	1	2.14794	359	255	365	273	18.9737
6	1	300	8	2.87294	615	102	372	266	293.164
6	1	200	4	3.66893	359	255	575	152	239.301
6	1	200	2	1.7289	339	484	366	256	229.593
6	1	100	0.5	1.90024	546	478	384	504	164.073
6	1	300	4	2.49006	794	487	553	474	241.35
6	1	100	8	2.80153	448	461	676	505	232.207
6	1	300	4	2.0145	252	234	447	456	295.481
6	1	300	2	3.78724	807	332	912	320	105.683
6	1	300	4	5.50645	460	679	467	724	45.5412
6	1	300	1	3.07657	230	487	270	559	82.365
6	1	300	2	2.25585	409	102	356	132	60.9016
6	1	200	0.5	2.86112	547	187	549	171	16.1245
6	1	200	0.5	2.63911	383	231	399	261	34
6	1	300	4	8.49547	217	332	399	318	182.538
6	1	100	2	1.3956	418	350	407	362	16.2788
6	1	200	1	3.70787	580	572	561	508	66.7608
6	1	100	1	2.1871	529	482	545	527	47.7598
6	1	200	8	3.02644	665	255	606	301	74.8131
6	1	100	0.5	2.74428	435	448	421	470	26.0768
6	1	300	8	5.72593	217	332	302	409	114.691
6	1	100	8	3.62775	495	482	416	509	83.4865
6	1	200	4	1.95742	685	484	669	506	27.2029
6	1	100	1	2.1269	462	471	450	476	13
6	1	200	0.5	1.75792	547	581	548	594	13.0384
6	1	100	8	2.55181	562	471	564	528	57.0351
6	1	200	1	3.36164	700	316	715	364	50.2892
6	2	300	1	25.5585	217	332	549	394	337.74
6	2	300	2	2.17553	794	281	291	325	504.921
6	2	300	2	2.07537	662	124	793	322	237.413
6	2	200	2	2.50226	339	284	723	159	403.833
6	2	300	1	8.80476	615	102	773	87	158.71
6	2	100	0.5	3.12015	462	471	501	437	51.7397
6	2	100	8	4.07051	418	418	414	493	75.1066
6	2	200	0.5	2.83596	324	316	313	317	11.0454
6	2	100	4	3.15461	546	478	580	510	46.6905
6	2	200	4	9.31779	324	452	327	492	40.1123
6	2	300	4	4.47462	615	666	633	645	27.6586
6	2	100	0.5	1.86381	462	297	455	309	13.8924
6	2	300	0.5	3.30588	662	124	670	120	8.94427
6	2	200	8	2.97955	324	316	342	250	68.4105
6	2	100	2	2.20503	606	418	588	432	22.8035
6	2	300	8	3.00937	460	679	539	634	90.9175
6	2	200	0.5	3.3902	383	537	370	591	55.5428
6	2	100	2	1.76324	546	290	568	294	22.3607
6	2	100	8	2.48178	462	297	485	288	24.6982
6	2	300	8	1.69856	807	332	837	302	42.4264
6	2	200	4	2.98379	665	255	692	267	29.5466
6	2	200	1	2.18492	665	513	757	523	92.5419
6	2	200	1	2.02871	324	316	339	318	15.1327
6	2	300	8	1.85447	705	614	735	557	64.4127
6	2	200	2	3.93984	477	187	416	227	72.9452
6	2	100	1	1.48955	589	448	568	450	21.095
6	2	300	0.5	3.1958	705	154	739	144	35.4401
6	2	200	4	1.49089	700	452	726	434	31.6228
6	2	100	4	1.24194	435	448	460	449	25.02
6	2	100	1	17.9697	606	418	586	243	176.139
6	3	300	0.5	1.16667	794	281	823	318	47.0106
6	3	100	2	7.1738	435	320	563	161	204.12
6	3	100	4	1.43498	495	286	499	284	4.47214
6	3	300	1	1.86737	217	436	291	477	84.5991
6	3	300	8	1.56248	362	124	272	307	203.934
6	3	300	1	1.71768	230	487	289	472	60.8769
6	3	200	4	3.23379	665	255	649	276	26.4008
6	3	200	1	2.33027	412	211	426	254	45.2217
6	3	100	2	1.77264	462	297	467	269	28.4429
6	3	100	0.5	1.17125	425	434	429	457	23.3452
6	3	100	8	1.7546	478	478	467	473	12.083
6	3	300	4	1.63514	319	154	380	164	61.8142
6	3	200	4	1.34683	580	572	606	560	28.6356
6	3	300	8	3.29028	230	487	408	579	200.37
6	3	200	2	7.06614	315	419	598	347	292.015
6	3	100	0.5	1.07477	478	478	464	466	18.4391
6	3	200	8	2.08711	547	581	554	543	38.6394
6	3	200	2	1.78394	315	349	398	415	106.042
6	3	200	1	1.61959	612	211	606	238	27.6586
6	3	100	0.5	1.57126	589	448	613	471	33.2415
6	3	200	8	1.50524	339	484	286	473	54.1295
6	3	100	1	2.21908	576	461	576	409	52
6	3	300	0.5	2.14817	362	644	323	635	40.025
6	3	200	1	1.21036	547	187	597	177	50.9902
6	3	200	0.5	1.77982	700	452	720	483	36.8917
6	3	100	4	1.58931	529	286	569	278	40.7922
6	3	300	4	1.60601	460	89	477	146	59.4811
6	3	300	2	2.15992	282	577	337	584	55.4437
6	3	300	2	3.051	460	679	434	708	38.9487
6	3	100	8	4.06953	599	434	599	482	48
6	4	200	4	2.18715	547	581	535	620	40.8044
6	4	100	4	2.403	546	290	533	286	13.6015
6	4	200	8	1.94136	641	537	617	538	24.0208
6	4	200	1	3.00987	700	452	789	505	103.586
6	4	100	4	1.25021	425	334	421	323	11.7047
6	4	200	0.5	2.11092	580	196	575	178	18.6815
6	4	300	1	1.85763	460	89	511	67	55.5428
6	4	300	1	2.8418	252	234	318	206	71.6938
6	4	200	0.5	0.953487	700	316	666	348	46.6905
6	4	300	2	2.90897	807	436	728	440	79.1012
6	4	200	0.5	1.2546	685	284	704	311	33.0151
6	4	200	0.5	1.11699	359	255	377	260	18.6815
6	4	300	0.5	1.27622	230	281	273	264	46.2385
6	4	100	8	2.03202	495	482	549	483	54.0093
6	4	100	8	1.23605	495	286	537	289	42.107
6	4	100	2	2.77076	610	367	580	353	33.1059
6	4	100	1	1.4747	418	350	434	336	21.2603
6	4	300	8	1.70135	807	436	832	417	31.4006
6	4	200	8	1.56189	444	196	470	200	26.3059
6	4	200	2	2.59751	412	557	434	577	29.7321
6	4	300	4	5.41995	217	332	658	556	494.628
6	4	200	8	1.40208	324	316	268	272	71.218
6	4	100	2	1.98857	448	461	465	475	22.0227
6	4	300	4	5.86762	705	154	641	197	77.1038
6	4	100	2	4.30802	462	297	478	298	16.0312
6	4	100	1	1.1082	576	307	599	304	23.1948
6	4	300	1	3.3494	319	614	314	585	29.4279
6	4	100	4	1.63508	418	350	413	367	17.72
6	4	300	0.5	2.2844	319	154	314	191	37.3363
6	4	300	2	3.11844	282	577	278	602	25.318
6	5	100	4	1.43332	606	350	601	414	64.195
6	5	300	8	1.59693	794	487	836	480	42.5793
6	5	200	4	1.46793	685	484	669	494	18.868
6	5	200	2	2.13162	383	537	356	562	36.7967
6	5	300	1	1.97343	252	234	315	258	67.4166
6	5	300	1	2.55564	252	534	287	564	46.0977
6	5	300	8	1.42877	772	234	773	251	17.0294
6	5	200	2	2.19242	324	316	328	286	30.2655
6	5	100	8	1.95912	562	297	572	298	10.0499
6	5	300	0.5	2.21144	662	644	681	664	27.5862
6	5	300	4	1.25017	217	332	280	318	64.5368
6	5	200	2	3.00581	665	255	687	283	35.609
6	5	100	0.5	2.58729	599	334	667	364	74.3236
6	5	200	2	2.15461	700	316	747	308	47.676
6	5	300	4	1.72378	705	154	743	184	48.4149
6	5	100	1	2.10461	425	434	442	452	24.7588
6	5	300	8	1.96992	742	577	787	517	75
6	5	200	4	1.41699	709	419	773	431	65.1153
6	5	200	1	2.19099	477	187	496	180	20.2485
6	5	100	2	1.03195	478	478	467	474	11.7047
6	5	100	0.5	1.78013	448	461	460	491	32.311
6	5	300	0.5	2.72185	772	534	831	534	59
6	5	300	2	1.46085	217	436	256	474	54.4518
6	5	100	0.5	2.19082	435	448	447	463	19.2094
6	5	100	1	1.32562	495	482	510	477	15.8114
6	5	200	1	1.86708	547	187	614	184	67.0671
6	5	100	4	1.31604	435	320	439	283	37.2156
6	5	200	8	1.67211	641	231	623	286	57.8705
6	5	100	0.5	1.25489	546	478	552	490	13.4164
6	5	200	8	1.95566	359	255	396	306	63.0079
6	6	300	1	1.18025	742	577	778	394	186.507
6	6	300	2	4.6237	794	487	325	528	470.789
6	6	300	1	8.4744	409	102	481	218	136.528
6	6	200	8	0.791424	339	484	366	501	31.9061
6	6	200	4	1.93428	315	349	349	322	43.4166
6	6	100	0.5	2.44116	495	482	509	484	14.1421
6	6	200	8	2.76767	339	484	367	528	52.1536
6	6	300	2	2.89386	742	577	752	584	12.2066
6	6	100	2	3.71488	562	297	604	329	52.8015
6	6	300	0.5	3.024	742	577	810	566	68.884
6	6	300	2	2.8193	252	534	328	543	76.531
6	6	100	4	1.80974	462	297	463	276	21.0238
6	6	200	1	3.88743	339	484	438	548	117.886
6	6	300	8	3.27963	252	534	297	528	45.3982
6	6	200	8	5.2597	665	513	525	375	196.581
6	6	200	4	7.11754	444	196	496	262	84.0238
6	6	100	0.5	9.70002	529	482	555	548	70.9366
6	6	300	4	1.34327	252	234	335	269	90.0777
6	6	100	1	1.66969	425	434	445	451	26.2488
6	6	100	2	1.93871	529	482	538	486	9.84886
6	6	100	8	1.89844	462	471	462	493	22
6	6	300	0.5	2.28937	409	666	361	694	55.5698
6	6	200	4	1.5939	477	187	512	211	42.4382
6	6	200	1	2.34599	709	419	784	405	76.2955
6	6	200	2	1.40832	383	537	416	551	35.8469
6	6	100	4	3.43574	478	478	517	372	112.947
6	6	100	0.5	0.859338	448	307	460	286	24.1868
6	6	100	1	1.82758	414	367	389	373	25.7099
6	6	300	0.5	1.86608	794	487	770	486	24.0208
6	6	200	8	1.19481	477	187	516	221	51.7397
7	1	200	0.5	5.15359	641	231	649	234	8.544
7	1	300	8	4.33678	362	124	317	156	55.2178
7	1	300	8	3.09899	217	436	198	442	19.9249
7	1	100	4	3.3291	546	478	556	498	22.3607
7	1	100	2	2.92922	589	320	621	315	32.3883
7	1	300	4	2.72215	252	534	172	575	89.8944
7	1	200	2	2.39178	580	572	568	591	22.4722
7	1	100	1	4.37363	414	367	371	379	44.643
7	1	300	8	3.96523	460	89	403	95	57.3149
7	1	300	2	1.89003	362	124	271	93	96.1353
7	1	300	4	2.17943	409	666	393	684	24.0832
7	1	100	1	1.97302	418	350	415	345	5.83095
7	1	100	4	1.35737	599	334	584	324	18.0278
7	1	300	1	2.31709	460	89	488	64	37.5366
7	1	100	2	2.24345	448	461	453	483	22.561
7	1	200	0.5	1.72487	709	419	753	436	47.1699
7	1	100	8	2.05786	414	367	337	375	77.4145
7	1	200	8	1.61004	444	572	413	572	31
7	1	200	2	3.04811	383	231	355	258	38.8973
7	1	200	2	3.52582	477	581	451	624	50.2494
7	1	200	0.5	1.84461	412	211	407	237	26.4764
7	1	200	4	3.29258	444	196	400	218	49.1935
7	1	300	1	2.32911	807	332	824	337	17.72
7	1	300	0.5	1.61923	252	534	236	554	25.6125
7	1	100	0.5	1.14075	610	367	660	379	51.4198
7	1	100	0.5	3.14951	606	350	613	354	8.06226
7	1	200	4	2.06565	700	452	678	481	36.4005
7	1	200	8	3.12278	580	572	602	525	51.8941
7	1	300	1	3.18467	362	644	317	666	50.0899
7	1	100	1	2.80284	448	307	436	325	21.6333
7	2	100	2	3.53675	529	482	563	485	34.1321
7	2	100	2	2.25898	448	307	427	329	30.4138
7	2	200	4	3.09756	709	419	687	409	24.1661
7	2	300	0.5	2.37707	772	534	827	558	60.0083
7	2	300	0.5	2.14943	564	89	582	105	24.0832
7	2	200	8	4.66011	412	557	346	593	75.1798
7	2	300	1	2.20295	460	679	486	688	27.5136
7	2	300	4	2.85477	615	666	660	671	45.2769
7	2	100	4	1.35448	610	367	620	397	31.6228
7	2	100	2	1.40311	478	290	476	295	5.38516
7	2	300	1	1.56572	282	577	229	594	55.6597
7	2	100	4	4.74778	529	482	541	498	20
7	2	200	1	1.41901	477	187	464	208	24.6982
7	2	200	8	22.0892	324	452	283	531	89.0056
7	2	100	2	1.89752	589	320	620	308	33.2415
7	2	100	0.5	1.6801	529	482	564	515	48.1041
7	2	100	8	1.58721	462	297	393	306	69.5845
7	2	200	1	1.78699	547	581	585	612	49.0408
7	2	300	2	2.56962	564	679	586	680	22.0227
7	2	300	8	1.98466	794	281	811	308	31.9061
7	2	300	2	2.52163	217	436	177	442	40.4475
7	2	200	8	1.56069	665	255	641	281	35.3836
7	2	100	0.5	2.05045	589	448	627	453	38.3275
7	2	100	0.5	2.38574	529	482	568	494	40.8044
7	2	200	4	1.57102	444	572	408	595	42.72
7	2	300	8	1.9846	564	89	572	111	23.4094
7	2	300	1	1.612	564	89	573	72	19.2354
7	2	200	0.5	1.50825	709	419	732	461	47.8853
7	2	200	4	3.0478	700	316	750	347	58.8303
7	2	200	1	1.80158	700	316	712	315	12.0416
7	3	100	1	2.08445	576	461	574	457	4.47214
7	3	200	0.5	2.29423	580	572	626	606	57.2014
7	3	100	2	1.72203	576	461	613	487	45.2217
7	3	100	8	1.42444	478	478	495	482	17.4642
7	3	300	4	3.04344	282	191	225	217	62.6498
7	3	200	4	1.78769	665	513	677	538	27.7308
7	3	200	4	4.52079	580	196	586	238	42.4264
7	3	100	0.5	3.59285	576	461	583	470	11.4018
7	3	200	1	1.94259	665	513	695	505	31.0483
7	3	300	0.5	1.73424	217	436	206	450	17.8045
7	3	300	2	2.83179	230	487	193	509	43.0465
7	3	200	0.5	4.27075	477	187	441	246	69.1158
7	3	100	1	1.85021	418	418	402	456	41.2311
7	3	200	8	2.21317	580	196	587	225	29.8329
7	3	100	8	2.02828	478	290	471	319	29.8329
7	3	300	2	2.2421	742	191	727	238	49.3356
7	3	200	8	3.25565	359	255	319	291	53.8145
7	3	100	1	1.49884	562	471	565	481	10.4403
7	3	300	8	6.05616	319	614	259	667	80.0562
7	3	300	4	2.56398	807	436	813	485	49.366
7	3	300	1	1.78669	742	577	774	597	37.7359
7	3	300	2	1.74432	217	436	229	428	14.4222
7	3	100	4	2.68624	418	418	415	436	18.2483
7	3	200	8	5.07045	412	211	407	258	47.2652
7	3	100	4	2.14714	414	401	392	417	27.2029
7	3	300	2	1.40846	794	487	812	508	27.6586
7	3	200	1	3.00497	324	452	319	472	20.6155
7	3	200	0.5	2.79253	665	255	648	300	48.1041
7	3	300	2	2.15874	772	534	767	568	34.3657
7	3	100	0.5	1.95482	529	286	506	334	53.2259
7	4	200	8	1.685	547	187	559	190	12.3693
7	4	100	4	3.96533	576	461	591	483	26.6271
7	4	200	1	4.26709	547	581	558	591	14.8661
7	4	100	8	1.26868	418	418	394	453	42.4382
7	4	100	8	1.46481	448	307	432	334	31.3847
7	4	200	2	1.87929	547	581	563	583	16.1245
7	4	200	2	1.85397	700	316	745	348	55.2178
7	4	300	8	2.44964	362	644	361	682	38.0132
7	4	100	1	1.34732	414	401	366	420	51.6236
7	4	300	0.5	1.32316	409	102	376	143	52.6308
7	4	300	2	2.27368	217	332	209	344	14.4222
7	4	300	4	2.4688	742	577	760	605	33.2866
7	4	100	4	2.29842	448	461	452	450	11.7047
7	4	200	1	3.02166	612	557	635	526	38.6005
7	4	300	0.5	2.52473	662	124	711	160	60.803
7	4	100	2	1.40826	418	418	415	437	19.2354
7	4	100	4	1.70098	478	478	469	513	36.1386
7	4	100	8	1.71167	529	482	534	473	10.2956
7	4	200	0.5	2.48395	709	419	727	412	19.3132
7	4	200	0.5	2.82242	324	316	377	351	63.5138
7	4	100	8	2.4582	529	482	559	476	30.5941
7	4	300	0.5	1.41207	362	644	344	634	20.5913
7	4	100	4	1.97818	599	334	589	356	24.1661
7	4	200	1	5.12489	339	284	312	321	45.8039
7	4	300	4	1.78675	460	679	404	662	58.5235
7	4	300	2	1.3699	742	191	755	273	83.0241
7	4	200	1	1.49507	580	572	597	611	42.5441
7	4	300	2	1.55533	319	154	251	190	76.9415
7	4	200	0.5	1.96086	665	255	625	264	41
7	4	300	1	2.1057	662	124	626	186	71.6938
7	5	100	8	3.21968	576	461	577	453	8.06226
7	5	300	4	2.10111	252	234	233	264	35.5106
7	5	200	2	3.96753	412	211	392	237	32.8024
7	5	100	0.5	2.24813	495	482	476	498	24.8395
7	5	100	4	1.972	448	307	408	307	40
7	5	100	8	1.94545	576	461	627	498	63.0079
7	5	300	1	2.23167	319	614	296	654	46.1411
7	5	300	2	3.29871	282	191	275	230	39.6232
7	5	200	4	1.74481	315	349	291	367	30
7	5	300	8	2.65309	564	89	549	133	46.4866
7	5	200	1	1.65011	665	255	692	288	42.638
7	5	200	8	3.65398	709	419	759	444	55.9017
7	5	100	4	2.40026	418	418	418	414	4
7	5	300	0.5	2.47715	807	436	823	453	23.3452
7	5	100	2	1.00297	546	290	556	299	13.4536
7	5	200	4	2.08622	700	452	711	478	28.2312
7	5	200	2	1.34272	580	196	588	229	33.9559
7	5	200	2	1.25131	580	196	564	220	28.8444
7	5	300	1	1.83174	230	487	219	484	11.4018
7	5	200	0.5	1.23801	612	557	620	561	8.94427
7	5	200	2	3.13186	612	557	624	551	13.4164
7	5	200	0.5	3.18417	685	484	695	469	18.0278
7	5	100	0.5	1.31796	435	448	415	443	20.6155
7	5	100	8	1.68096	478	478	450	493	31.7648
7	5	100	1	1.04954	418	350	419	369	19.0263
7	5	300	1	4.54953	742	191	713	228	47.0106
7	5	300	1	2.10868	319	154	290	160	29.6142
7	5	300	0.5	2.09595	564	679	570	690	12.53
7	5	300	8	1.43485	662	124	658	168	44.1814
7	5	100	4	1.14803	425	434	429	439	6.40312
7	6	200	1	1.7176	444	572	460	545	31.3847
7	6	100	1	0.939446	529	286	529	318	32
7	6	200	8	2.32147	700	316	657	342	50.2494
7	6	100	4	3.32573	599	434	589	439	11.1803
7	6	300	2	1.73063	794	281	808	302	25.2389
7	6	100	1	1.8443	462	471	472	468	10.4403
7	6	300	1	2.8217	252	234	236	255	26.4008
7	6	100	0.5	0.921307	425	434	418	451	18.3848
7	6	300	4	3.01587	319	614	299	638	31.241
7	6	100	4	1.23767	606	350	604	380	30.0666
7	6	300	8	1.94152	217	332	202	350	23.4307
7	6	100	2	1.90697	448	461	452	474	13.6015
7	6	200	0.5	1.46364	444	196	419	250	59.5063
7	6	200	2	1.98204	324	316	310	333	22.0227
7	6	200	0.5	1.29862	477	187	483	245	58.3095
7	6	300	1	2.60063	409	102	402	141	39.6232
7	6	300	8	3.33029	564	679	584	729	53.8516
7	6	200	8	2.72333	665	255	675	319	64.7765
7	6	300	0.5	1.2119	409	666	378	668	31.0644
7	6	100	2	1.03381	462	297	451	325	30.0832
7	6	100	8	1.7698	529	482	533	483	4.12311
7	6	200	4	1.87201	547	187	537	231	45.1221
7	6	300	8	3.66816	772	534	778	600	66.2722
7	6	200	0.5	2.94989	612	557	625	582	28.178
7	6	200	1	1.74905	700	316	689	339	25.4951
7	6	100	0.5	1.66077	546	478	563	482	17.4642
7	6	100	4	1.93278	576	461	574	459	2.82843
7	6	300	4	1.86989	705	154	672	224	77.3886
7	6	200	2	2.48122	685	484	696	469	18.6011
7	6	300	2	2.88278	807	332	814	385	53.4603
8	1	200	1	1.17542	709	349	738	355	29.6142
8	1	300	1	1.23143	742	577	719	554	32.5269
8	1	200	2	2.40446	412	557	448	492	74.3034
8	1	100	0.5	1.89593	414	367	422	352	17
8	1	300	1	2.31011	282	191	301	229	42.4853
8	1	200	1	3.9981	339	484	363	508	33.9411
8	1	200	4	1.99493	383	537	272	555	112.45
8	1	300	0.5	1.48208	362	644	354	597	47.676
8	1	100	0.5	1.30793	589	448	583	454	8.48528
8	1	200	4	2.4055	359	255	396	271	40.3113
8	1	100	1	2.58427	562	297	597	259	51.6624
8	1	100	2	2.50807	599	434	543	449	57.9741
8	1	200	8	4.65192	477	187	426	260	89.0505
8	1	100	4	2.71099	610	367	667	380	58.4637
8	1	100	8	1.94382	478	478	453	465	28.178
8	1	300	0.5	2.79257	742	577	718	544	40.8044
8	1	100	2	1.99131	495	286	493	293	7.28011
8	1	200	1	2.70976	383	537	397	538	14.0357
8	1	300	8	3.48741	252	234	307	269	65.192
8	1	200	2	2.3671	700	316	668	273	53.6004
8	1	100	8	3.23619	529	286	504	272	28.6531
8	1	100	4	2.86932	495	286	481	276	17.2047
8	1	300	0.5	3.48454	282	191	278	169	22.3607
8	1	300	0.5	3.02066	705	154	692	160	14.3178
8	1	200	8	4.30984	444	572	351	551	95.3415
8	1	100	8	6.06012	435	448	424	530	82.7345
8	1	200	4	3.43706	547	187	583	236	60.803
8	1	300	4	3.18841	460	89	472	182	93.771
8	1	300	2	5.73201	615	666	805	264	444.639
8	1	300	2	4.48491	319	154	274	176	50.0899
8	2	300	0.5	6.60251	742	191	687	200	55.7315
8	2	200	8	2.65261	685	484	694	480	9.84886
8	2	100	8	8.57735	425	334	544	380	127.581
8	2	300	8	2.63419	230	487	512	384	300.222
8	2	200	1	1.48291	685	484	673	477	13.8924
8	2	200	1	2.221	359	513	361	530	17.1172
8	2	200	4	1.83613	339	284	329	269	18.0278
8	2	300	4	2.05732	742	577	707	578	35.0143
8	2	200	2	2.06767	580	196	596	249	55.3624
8	2	100	0.5	1.73151	546	290	566	278	23.3238
8	2	300	4	1.75866	564	679	608	633	63.6553
8	2	100	4	2.66413	425	434	405	478	48.3322
8	2	300	1	3.51203	282	577	259	594	28.6007
8	2	100	4	4.46406	425	434	336	492	106.231
8	2	100	2	2.92907	448	461	454	469	10
8	2	200	8	3.47389	612	557	631	509	51.6236
8	2	200	0.5	4.59969	547	581	619	605	75.8947
8	2	200	0.5	2.46097	641	231	696	236	55.2268
8	2	100	0.5	3.63966	606	418	616	442	26
8	2	300	2	2.53651	772	234	693	302	104.235
8	2	300	1	1.8092	252	234	288	203	47.5079
8	2	300	0.5	2.44501	742	191	722	217	32.8024
8	2	300	8	1.19026	564	679	508	388	296.339
8	2	200	1	2.43471	412	211	365	167	64.3817
8	2	100	2	1.69126	606	350	632	317	42.0119
8	2	300	2	4.64356	282	191	482	389	281.432
8	2	200	1	1.86691	444	196	403	193	41.1096
8	2	100	8	1.86641	418	350	392	264	89.8443
8	2	100	2	1.64484	425	334	397	301	43.2782
8	2	100	4	2.62733	425	434	419	446	13.4164
8	3	200	8	1.88491	580	196	494	381	204.012
8	3	300	2	1.92411	742	577	745	617	40.1123
8	3	200	4	2.29039	547	187	608	217	67.9779
8	3	200	0.5	2.60565	359	513	378	509	19.4165
8	3	100	1	4.33595	562	471	551	485	17.8045
8	3	300	1	2.48134	662	644	637	621	33.9706
8	3	100	8	3.04883	425	334	418	330	8.06226
8	3	200	2	4.01252	477	581	446	519	69.3181
8	3	200	2	2.95573	324	452	384	491	71.5612
8	3	100	2	2.78974	435	448	405	465	34.4819
8	3	200	0.5	2.9835	700	452	722	490	43.909
8	3	300	1	2.84979	409	666	376	600	73.7902
8	3	200	4	2.74868	477	581	411	618	75.6637
8	3	100	0.5	1.67668	589	320	585	323	5
8	3	100	4	2.69884	448	307	441	314	9.89949
8	3	300	4	2.53321	564	89	518	149	75.6042
8	3	100	0.5	2.723	425	434	392	485	60.7454
8	3	100	1	3.56611	418	418	416	445	27.074
8	3	300	0.5	3.51994	662	644	649	655	17.0294
8	3	200	8	2.28318	359	255	412	249	53.3385
8	3	100	8	3.39643	599	334	617	303	35.8469
8	3	300	8	2.48341	409	102	631	384	358.898
8	3	200	1	2.39607	580	196	385	92	221
8	3	200	0.5	12.3889	665	513	612	194	323.373
8	3	300	4	2.71431	217	332	266	281	70.7248
8	3	300	2	2.76388	362	644	290	624	74.7262
8	3	100	8	2.7365	599	434	615	470	39.3954
8	3	100	4	1.84992	562	471	588	470	26.0192
8	3	300	2	2.56666	409	102	369	153	64.8151
8	3	300	1	3.82057	615	102	582	94	33.9559
8	4	300	4	3.68856	230	281	246	235	48.7032
8	4	300	2	2.8408	362	644	297	622	68.6222
8	4	300	4	2.78576	807	332	741	335	66.0681
8	4	300	1	3.09098	282	191	278	192	4.12311
8	4	300	4	3.39498	460	679	394	602	101.415
8	4	300	0.5	3.74765	460	679	468	661	19.6977
8	4	300	1	2.2438	794	281	774	251	36.0555
8	4	100	2	1.85717	425	434	386	440	39.4588
8	4	200	2	2.08253	700	452	659	451	41.0122
8	4	300	1	2.57781	252	534	290	529	38.3275
8	4	200	0.5	2.55826	383	231	368	256	29.1548
8	4	100	8	2.33601	562	297	587	296	25.02
8	4	100	2	2.37756	448	307	423	289	30.8058
8	4	200	8	2.63586	359	513	398	485	48.0104
8	4	300	8	2.3391	742	191	656	213	88.7694
8	4	200	8	1.67288	359	513	381	498	26.6271
8	4	100	4	1.92666	606	350	605	305	45.0111
8	4	200	8	47.426	477	187	500	403	217.221
8	4	200	4	1.52355	700	452	676	496	50.1199
8	4	100	2	2.49078	610	367	652	351	44.9444
8	4	200	2	1.8334	665	255	618	298	63.7024
8	4	200	0.5	1.93476	324	452	326	452	2
8	4	100	0.5	3.34739	478	290	436	264	49.3964
8	4	100	1	2.81718	448	461	451	478	17.2627
8	4	200	4	3.00755	383	537	382	531	6.08276
8	4	100	1	3.7315	435	448	419	483	38.4838
8	4	100	0.5	2.09615	414	401	384	423	37.2022
8	4	100	8	2.69132	606	418	655	445	55.9464
8	4	300	0.5	2.67014	230	281	262	264	36.2353
8	4	200	1	2.23442	324	452	283	468	44.0114
8	5	300	0.5	2.45812	319	614	338	604	21.4709
8	5	100	2	3.79293	599	334	606	316	19.3132
8	5	300	4	2.68899	564	679	617	626	74.9533
8	5	200	1	3.70412	383	537	375	545	11.3137
8	5	200	2	1.38644	665	255	512	384	200.125
8	5	300	4	2.8417	460	679	384	619	96.8297
8	5	200	0.5	2.18538	477	187	430	212	53.2353
8	5	200	0.5	3.69425	339	284	349	224	60.8276
8	5	200	8	4.40395	665	255	708	197	72.2011
8	5	300	2	9.62918	362	124	344	143	26.1725
8	5	100	0.5	5.25834	435	320	355	210	136.015
8	5	100	8	2.60354	448	461	416	457	32.249
8	5	300	4	2.29539	662	124	616	136	47.5395
8	5	100	8	2.01902	495	482	477	458	30
8	5	200	8	2.00152	324	316	337	292	27.2947
8	5	100	2	1.98929	599	434	615	453	24.8395
8	5	200	4	2.31397	700	316	663	292	44.1022
8	5	300	2	2.13943	217	332	228	331	11.0454
8	5	100	0.5	2.73895	418	350	398	338	23.3238
8	5	200	1	4.47827	412	211	409	211	3
8	5	100	2	1.36899	610	401	609	431	30.0167
8	5	300	4	3.14448	705	614	717	605	15
8	5	300	8	2.3162	794	487	512	384	300.222
8	5	100	1	3.05107	462	297	771	494	366.456
8	5	200	0.5	2.8169	383	537	407	549	26.8328
8	5	100	8	1.68013	448	307	455	327	21.1896
8	5	200	1	1.90735	709	349	711	336	13.1529
8	5	300	4	2.3481	615	666	669	669	54.0833
8	5	100	1	2.16983	425	334	420	311	23.5372
8	5	300	1	2.20784	807	332	764	294	57.3847
8	6	100	1	3.13356	418	418	396	426	23.4094
8	6	300	2	1.56158	460	679	512	384	299.548
8	6	200	0.5	3.71512	383	537	388	597	60.208
8	6	300	1	2.88445	662	644	651	636	13.6015
8	6	200	2	4.36509	324	452	341	487	38.9102
8	6	300	2	2.24457	319	614	339	545	71.8401
8	6	100	4	1.65847	562	297	578	274	28.0179
8	6	100	1	4.22829	478	478	433	491	46.8402
8	6	200	0.5	8.40048	412	557	399	503	55.5428
8	6	100	0.5	2.58857	606	350	596	344	11.6619
8	6	100	0.5	1.14138	414	367	409	353	14.8661
8	6	200	1	2.85215	665	255	705	241	42.3792
8	6	200	8	2.26315	709	349	738	345	29.2746
8	6	200	1	2.94353	444	196	397	188	47.676
8	6	300	1	2.8287	409	666	380	604	68.4471
8	6	200	4	2.65631	612	211	590	227	27.2029
8	6	300	2	3.59742	705	614	700	587	27.4591
8	6	100	8	2.33979	462	471	444	483	21.6333
8	6	300	0.5	1.87484	742	191	676	209	68.4105
8	6	100	8	1.47943	576	461	592	472	19.4165
8	6	100	4	2.8207	589	320	587	322	2.82843
8	6	100	8	1.72952	599	434	640	458	47.5079
8	6	300	4	2.55633	705	614	670	532	89.1572
8	6	300	8	1.62996	662	124	609	525	404.487
8	6	100	4	1.55195	546	478	584	498	42.9418
8	6	200	0.5	2.61992	700	452	684	457	16.7631
8	6	200	8	2.21074	709	419	709	475	56
8	6	300	2	2.18631	662	124	654	152	29.1204
8	6	300	4	3.52177	705	154	676	180	38.9487
8	6	200	2	2.0781	665	255	696	145	114.285
9	1	100	0.5	2.97263	546	478	548	481	3.60555
9	1	300	8	2.71014	252	234	312	229	60.208
9	1	100	1	1.91187	562	297	577	290	16.5529
9	1	300	8	4.19869	662	644	677	659	21.2132
9	1	100	1	2.37066	599	334	584	332	15.1327
9	1	300	0.5	3.68159	772	234	764	251	18.7883
9	1	200	2	2.94724	641	231	631	257	27.8568
9	1	300	1	3.55985	252	234	224	228	28.6356
9	1	200	2	2.55467	641	231	632	228	9.48683
9	1	200	0.5	5.70341	444	572	453	606	35.171
9	1	200	2	2.38645	339	284	340	280	4.12311
9	1	200	4	2.425	641	537	679	616	87.6641
9	1	100	2	2.95822	448	307	460	302	13
9	1	100	8	2.28602	529	482	544	485	15.2971
9	1	100	2	3.15906	599	334	586	330	13.6015
9	1	200	8	1.87324	324	316	337	283	35.4683
9	1	300	0.5	1.8086	772	234	790	238	18.4391
9	1	100	1	1.42825	478	478	475	463	15.2971
9	1	100	0.5	2.00967	448	461	447	439	22.0227
9	1	100	4	1.78714	418	418	420	423	5.38516
9	1	100	4	2.79272	448	307	431	297	19.7231
9	1	200	2	1.68183	339	484	348	522	39.0512
9	1	300	4	10.6982	615	666	489	391	302.491
9	1	200	1	3.09492	444	196	435	200	9.84886
9	1	200	4	2.26696	700	316	668	301	35.3412
9	1	300	8	2.19426	662	644	695	625	38.0789
9	1	300	1	2.11172	794	281	836	304	47.8853
9	1	300	0.5	16.7574	409	666	510	383	300.483
9	1	300	4	3.18052	362	124	352	115	13.4536
9	1	200	8	3.20083	641	231	668	245	30.4138
9	2	100	8	1.65202	435	448	427	444	8.94427
9	2	100	4	2.24075	606	350	611	361	12.083
9	2	300	4	3.026	362	124	361	120	4.12311
9	2	200	0.5	1.79829	641	537	642	533	4.12311
9	2	300	4	2.47284	662	644	636	678	42.8019
9	2	200	0.5	2.3424	477	187	495	202	23.4307
9	2	300	1	3.15726	705	614	700	665	51.2445
9	2	100	8	2.15806	562	297	572	321	26
9	2	200	8	1.85537	580	572	610	573	30.0167
9	2	200	0.5	8.53331	612	211	507	385	203.226
9	2	100	1	6.84054	414	367	511	383	98.3107
9	2	100	0.5	2.1362	414	367	405	349	20.1246
9	2	100	2	4.25128	610	367	515	367	95
9	2	300	1	1.82948	772	534	510	384	301.901
9	2	300	8	2.28299	564	679	533	652	41.1096
9	2	200	4	6.96195	580	196	576	235	39.2046
9	2	200	1	4.147	383	537	375	548	13.6015
9	2	100	1	3.09727	610	401	617	430	29.8329
9	2	100	4	2.39726	448	461	458	501	41.2311
9	2	300	2	2.58	460	679	471	681	11.1803
9	2	200	1	4.20672	665	513	513	398	190.602
9	2	100	2	2.29188	546	290	561	297	16.5529
9	2	100	4	2.02653	495	286	495	274	12
9	2	200	2	2.16659	315	349	299	344	16.7631
9	2	300	2	1.95552	772	534	753	552	26.1725
9	2	200	8	2.12648	700	316	746	366	67.9412
9	2	200	8	2.5784	700	316	710	306	14.1421
9	2	300	0.5	2.4557	662	644	690	705	67.1193
9	2	300	2	4.13867	230	281	235	243	38.3275
9	2	300	0.5	3.48668	460	679	439	724	49.6588
9	3	300	0.5	6.18062	460	679	511	346	336.883
9	3	300	4	2.09591	742	577	751	579	9.21954
9	3	200	1	1.7317	641	537	645	586	49.163
9	3	200	4	2.06132	477	581	448	588	29.8329
9	3	100	0.5	0.841653	562	471	589	493	34.8281
9	3	300	2	2.79906	742	577	511	383	301.657
9	3	300	1	2.47582	217	332	213	330	4.47214
9	3	200	2	1.80735	359	255	342	240	22.6716
9	3	100	8	2.88283	435	448	399	518	78.7147
9	3	300	4	1.87369	362	124	512	384	300.167
9	3	100	4	2.63779	435	320	418	307	21.4009
9	3	200	2	2.00529	612	211	590	236	33.3017
9	3	300	2	2.10617	460	89	405	60	62.1772
9	3	100	2	2.20145	606	350	623	358	18.7883
9	3	300	1	2.12483	772	534	732	549	42.72
9	3	100	1	3.53089	495	286	474	270	26.4008
9	3	300	4	2.42769	807	436	789	457	27.6586
9	3	100	0.5	2.09665	529	482	508	493	23.7065
9	3	200	4	4.24662	685	284	685	282	2
9	3	200	8	3.12899	444	196	431	173	26.4197
9	3	300	1	6.47573	662	124	686	102	32.5576
9	3	100	8	3.02339	589	320	589	325	5
9	3	200	0.5	3.59677	324	452	324	467	15
9	3	300	8	3.87515	319	614	313	640	26.6833
9	3	200	0.5	2.15328	685	484	643	484	42
9	3	100	2	2.94785	589	448	555	440	34.9285
9	3	100	8	1.94404	448	461	461	449	17.6918
9	3	200	1	3.72556	709	349	744	331	39.3573
9	3	200	8	2.19476	444	196	439	186	11.1803
9	3	100	0.5	2.41135	606	350	648	320	51.614
9	4	200	1	3.01619	477	187	451	219	41.2311
9	4	100	4	2.10348	562	297	568	303	8.48528
9	4	300	0.5	3.54901	615	102	619	106	5.65685
9	4	100	2	1.93108	562	471	582	483	23.3238
9	4	300	4	2.45319	662	644	703	664	45.618
9	4	100	1	1.78475	589	320	600	337	20.2485
9	4	100	0.5	1.21255	462	471	470	469	8.24621
9	4	200	0.5	1.80576	547	581	544	587	6.7082
9	4	300	8	1.1693	615	666	631	646	25.6125
9	4	300	1	3.0564	409	666	426	671	17.72
9	4	100	1	1.04302	448	307	433	288	24.2074
9	4	100	0.5	0.940304	610	401	623	433	34.5398
9	4	300	1	2.43417	230	487	289	501	60.6383
9	4	100	4	2.25131	546	478	555	475	9.48683
9	4	200	2	1.51848	444	572	459	549	27.4591
9	4	300	2	2.05094	807	436	831	447	26.4008
9	4	300	8	2.4401	252	234	241	226	13.6015
9	4	300	2	2.46311	705	154	684	150	21.3776
9	4	100	2	1.39037	425	434	417	437	8.544
9	4	300	8	2.65375	217	332	246	367	45.4533
9	4	200	4	2.20069	547	581	635	657	116.276
9	4	100	4	3.74921	529	482	550	536	57.9396
9	4	100	0.5	1.74895	478	290	461	288	17.1172
9	4	200	8	6.00953	665	513	512	384	200.125
9	4	200	0.5	1.75757	547	581	534	587	14.3178
9	4	200	2	2.53633	339	284	340	281	3.16228
9	4	200	8	2.7213	641	231	679	239	38.833
9	4	200	1	1.80695	315	419	324	425	10.8167
9	4	300	8	2.64225	742	191	782	223	51.225
9	4	200	4	3.73061	359	513	373	527	19.799
9	5	300	8	2.34058	615	102	679	90	65.1153
9	5	100	0.5	1.02783	546	290	559	293	13.3417
9	5	300	4	2.14339	362	124	351	103	23.7065
9	5	200	8	3.17177	315	419	301	413	15.2315
9	5	200	8	1.70583	665	513	593	477	80.4984
9	5	300	8	1.82768	807	436	723	480	94.8262
9	5	200	1	2.61424	547	581	542	586	7.07107
9	5	200	2	2.95973	383	231	376	239	10.6301
9	5	100	1	1.3918	495	482	489	512	30.5941
9	5	100	0.5	1.92144	606	418	608	408	10.198
9	5	200	4	1.71734	709	419	749	418	40.0125
9	5	300	1	2.12382	460	679	421	673	39.4588
9	5	200	1	2.25687	685	284	680	304	20.6155
9	5	100	0.5	2.09131	589	320	587	326	6.32456
9	5	200	4	1.0345	477	187	510	383	198.759
9	5	300	2	4.28399	282	191	271	208	20.2485
9	5	300	0.5	2.60489	319	154	326	153	7.07107
9	5	100	4	1.87334	589	448	638	534	98.9798
9	5	300	0.5	1.50993	564	679	590	673	26.6833
9	5	100	4	1.96029	606	418	634	435	32.7567
9	5	300	8	2.83302	319	154	510	390	303.607
9	5	100	1	1.12593	562	297	588	306	27.5136
9	5	100	1	2.57763	448	307	440	272	35.9026
9	5	200	8	2.74779	665	255	695	248	30.8058
9	5	200	2	2.4582	477	187	480	188	3.16228
9	5	100	2	1.52331	435	448	417	483	39.3573
9	5	200	2	1.57747	665	255	670	248	8.60233
9	5	300	4	4.56939	409	102	506	384	298.216
9	5	300	0.5	1.05828	217	332	204	359	29.9666
9	5	100	2	1.37879	562	297	565	297	3
9	6	200	2	1.55921	383	231	409	229	26.0768
9	6	100	1	1.31328	435	448	435	428	20
9	6	300	8	2.35434	409	102	370	68	51.7397
9	6	300	2	1.42777	742	191	741	200	9.05539
9	6	300	2	4.10358	252	234	243	226	12.0416
9	6	100	0.5	2.30363	448	307	430	301	18.9737
9	6	100	0.5	1.7007	589	320	591	313	7.28011
9	6	300	8	2.28184	282	191	250	145	56.0357
9	6	300	8	2.39287	564	89	566	45	44.0454
9	6	200	1	1.85564	324	452	327	448	5
9	6	100	4	1.2681	546	290	538	267	24.3516
9	6	100	2	2.26834	562	471	558	469	4.47214
9	6	100	4	3.13313	562	297	556	323	26.6833
9	6	200	8	1.96555	324	452	290	496	55.6058
9	6	200	2	1.47758	359	513	335	557	50.1199
9	6	100	1	1.75218	495	482	494	485	3.16228
9	6	300	0.5	2.31554	252	534	273	517	27.0185
9	6	100	4	2.11673	589	448	595	469	21.8403
9	6	200	0.5	1.80628	665	513	683	561	51.264
9	6	200	1	3.16056	665	255	625	253	40.05
9	6	100	8	1.98521	589	320	573	321	16.0312
9	6	200	8	1.21148	324	452	278	494	62.2896
9	6	300	4	2.96361	772	534	765	549	16.5529
9	6	200	2	3.51329	665	255	715	252	50.0899
9	6	300	4	3.47375	282	577	280	590	13.1529
9	6	100	4	2.66983	435	448	428	464	17.4642
9	6	300	1	1.43411	282	577	263	625	51.6236
9	6	200	1	2.39505	412	557	418	579	22.8035
9	6	300	0.5	1.3311	217	436	204	419	21.4009
9	6	200	0.5	1.16566	547	187	555	203	17.8885
10	1	100	2	1.84706	589	448	587	450	2.82843
10	1	300	8	2.16201	409	666	376	522	147.733
10	1	100	1	3.15653	589	320	598	315	10.2956
10	1	200	0.5	2.54312	444	572	456	572	12
10	1	100	2	2.10978	448	461	447	469	8.06226
10	1	100	2	1.66237	435	448	413	458	24.1661
10	1	200	4	1.25492	383	231	406	282	55.9464
10	1	100	4	2.97168	414	367	431	370	17.2627
10	1	300	2	2.79244	807	332	788	307	31.4006
10	1	100	1	2.51219	546	478	528	462	24.0832
10	1	100	1	2.88831	418	350	426	343	10.6301
10	1	300	8	3.83353	460	89	462	103	14.1421
10	1	200	8	2.19153	580	572	551	542	41.7253
10	1	300	0.5	2.22421	362	124	317	124	45
10	1	200	8	3.95531	580	572	618	548	44.9444
10	1	200	0.5	2.26343	444	196	457	193	13.3417
10	1	300	2	2.39252	794	281	797	263	18.2483
10	1	300	8	2.55078	742	577	779	546	48.2701
10	1	100	2	1.95987	589	448	584	441	8.60233
10	1	300	8	3.20166	772	534	715	539	57.2189
10	1	300	1	3.38096	460	89	486	71	31.6228
10	1	300	0.5	3.1467	230	281	202	226	61.7171
10	1	200	1	15.76	412	211	231	292	198.298
10	1	200	4	1.69729	641	231	657	186	47.7598
10	1	100	4	2.02089	425	334	432	309	25.9615
10	1	200	1	3.82942	641	537	676	542	35.3553
10	1	300	4	5.42371	217	332	186	335	31.1448
10	1	100	0.5	2.51684	576	461	522	436	59.5063
10	1	200	4	2.76323	612	557	637	596	46.3249
10	1	200	0.5	3.18724	359	513	330	546	43.9318
10	2	300	1	2.4141	807	332	798	301	32.28
10	2	200	0.5	1.47136	412	211	397	229	23.4307
10	2	300	0.5	3.13321	252	234	250	243	9.21954
10	2	100	4	3.43761	425	334	397	338	28.2843
10	2	300	0.5	2.36035	230	487	176	505	56.921
10	2	100	4	2.23533	425	434	442	432	17.1172
10	2	200	1	1.58456	339	484	334	475	10.2956
10	2	300	2	2.01296	662	644	673	634	14.8661
10	2	100	4	7.81114	546	478	583	454	44.1022
10	2	100	4	2.02506	478	478	479	454	24.0208
10	2	100	1	2.88461	448	461	448	431	30
10	2	200	2	2.70198	580	196	570	225	30.6757
10	2	100	2	2.17904	610	401	638	405	28.2843
10	2	100	8	2.06922	462	471	432	433	48.4149
10	2	300	1	4.18621	807	332	757	330	50.04
10	2	200	4	5.26845	665	255	693	246	29.4109
10	2	200	8	4.44383	700	316	708	318	8.24621
10	2	300	1	1.71481	252	234	222	209	39.0512
10	2	300	2	2.73135	742	577	729	515	63.3482
10	2	200	4	1.47767	641	231	628	246	19.8494
10	2	200	0.5	2.2998	547	581	509	550	49.0408
10	2	100	0.5	3.03383	462	297	455	275	23.0868
10	2	300	8	2.33829	409	666	360	614	71.4493
10	2	100	2	2.23478	529	286	530	284	2.23607
10	2	200	1	2.37237	580	196	563	217	27.0185
10	2	300	8	2.06555	772	234	712	213	63.5689
10	2	100	8	3.75475	546	290	572	267	34.7131
10	2	200	0.5	3.44585	359	255	354	251	6.40312
10	2	300	8	2.44915	705	614	737	638	40
10	2	200	2	2.29178	709	349	716	368	20.2485
10	3	200	4	2.21857	612	557	606	513	44.4072
10	3	200	0.5	2.24365	477	581	470	553	28.8617
10	3	100	1	1.39531	448	307	460	333	28.6356
10	3	100	4	1.70585	589	320	601	317	12.3693
10	3	300	4	4.89091	705	614	690	614	15
10	3	200	2	2.00481	383	231	363	277	50.1597
10	3	300	8	1.77419	362	644	319	697	68.2495
10	3	100	1	1.16633	529	286	528	310	24.0208
10	3	100	2	2.48336	495	482	488	460	23.0868
10	3	100	0.5	2.13327	606	418	605	439	21.0238
10	3	300	2	3.04678	807	436	734	445	73.5527
10	3	300	0.5	4.32605	564	679	591	638	49.0918
10	3	300	1	1.29786	217	332	204	290	43.9659
10	3	100	8	3.99894	414	367	378	376	37.108
10	3	200	4	4.62661	383	231	360	269	44.4185
10	3	100	8	1.47639	562	297	523	285	40.8044
10	3	200	1	2.6733	315	419	230	469	98.6154
10	3	300	8	6.14225	662	644	619	608	56.0803
10	3	100	2	2.13069	589	320	588	330	10.0499
10	3	200	1	4.08421	580	196	572	228	32.9848
10	3	200	4	1.19029	547	187	556	194	11.4018
10	3	300	4	2.49171	217	332	169	370	61.2209
10	3	200	0.5	2.77492	685	484	702	479	17.72
10	3	100	0.5	2.93027	599	434	615	430	16.4924
10	3	300	8	2.98108	807	332	740	340	67.4759
10	3	300	8	2.62157	319	614	266	674	80.0562
10	3	300	0.5	1.85097	662	124	626	185	70.8308
10	3	100	2	3.11958	448	461	431	457	17.4642
10	3	200	1	2.94808	580	196	567	198	13.1529
10	3	200	2	2.92186	665	255	639	275	32.8024
10	4	100	2	2.06134	414	367	433	377	21.4709
10	4	100	8	3.75584	414	401	416	403	2.82843
10	4	200	1	3.67777	412	211	407	224	13.9284
10	4	300	1	1.81042	615	666	680	627	75.8024
10	4	200	4	2.10579	709	349	689	330	27.5862
10	4	300	1	2.97269	742	191	720	196	22.561
10	4	200	2	2.14462	444	196	421	208	25.9422
10	4	100	0.5	2.7128	495	482	536	514	52.0096
10	4	100	2	2.3557	562	471	533	501	41.7253
10	4	300	0.5	1.39822	772	234	734	260	46.0435
10	4	300	0.5	4.38627	662	644	666	625	19.4165
10	4	200	0.5	1.75243	547	187	558	222	36.6879
10	4	200	1	1.89102	324	316	328	315	4.12311
10	4	100	2	1.22524	546	290	549	286	5
10	4	200	4	1.82244	612	211	584	233	35.609
10	4	200	0.5	1.47862	612	211	619	221	12.2066
10	4	100	0.5	1.88626	576	461	573	485	24.1868
10	4	100	8	1.86891	414	401	422	414	15.2643
10	4	300	4	3.78676	409	102	403	116	15.2315
10	4	300	2	2.41628	807	436	770	427	38.0789
10	4	100	1	1.55911	529	482	526	470	12.3693
10	4	300	4	1.6754	772	534	776	488	46.1736
10	4	200	4	2.52685	612	557	571	560	41.1096
10	4	200	1	1.53211	709	419	710	442	23.0217
10	4	100	2	1.86031	576	461	614	458	38.1182
10	4	300	8	2.28595	772	534	759	503	33.6155
10	4	300	8	2.80619	564	679	549	663	21.9317
10	4	300	8	3.05519	319	154	322	184	30.1496
10	4	100	4	2.33937	529	482	496	462	38.5876
10	4	200	8	2.57643	339	484	298	462	46.5296
10	5	100	2	1.58972	606	418	596	429	14.8661
10	5	300	2	1.98755	794	487	730	467	67.0522
10	5	300	0.5	1.30024	409	102	402	101	7.07107
10	5	200	4	4.42645	315	349	228	332	88.6454
10	5	100	8	1.22802	435	448	358	408	86.7698
10	5	100	1	2.3997	562	297	566	282	15.5242
10	5	200	1	2.74894	709	349	698	336	17.0294
10	5	100	8	2.38539	546	478	515	464	34.0147
10	5	300	1	2.42092	564	679	588	613	70.2282
10	5	300	8	2.09868	615	102	588	93	28.4605
10	5	300	1	2.00826	772	534	752	548	24.4131
10	5	100	4	1.51435	435	320	433	327	7.28011
10	5	300	1	2.57982	282	577	286	564	13.6015
10	5	100	2	3.41288	546	290	534	297	13.8924
10	5	300	4	2.3894	794	281	764	280	30.0167
10	5	300	2	1.76297	460	89	482	81	23.4094
10	5	100	4	3.84906	495	482	507	447	37
10	5	100	2	2.60697	462	297	473	298	11.0454
10	5	100	1	2.1837	576	307	563	311	13.6015
10	5	200	0.5	2.50106	700	316	714	301	20.5183
10	5	200	8	2.17734	412	557	372	541	43.0813
10	5	300	8	2.28273	564	89	542	97	23.4094
10	5	300	0.5	2.74144	362	124	361	128	4.12311
10	5	200	4	2.6924	665	255	627	237	42.0476
10	5	200	0.5	1.55388	383	537	343	478	71.2811
10	5	100	0.5	1.60667	529	286	548	293	20.2485
10	5	200	0.5	2.33999	685	484	646	482	39.0512
10	5	200	4	1.73636	612	211	611	436	225.002
10	5	200	2	1.67383	612	557	680	573	69.857
10	5	200	8	3.20676	324	452	324	489	37
10	6	100	1	1.82687	462	471	471	458	15.8114
10	6	300	1	2.45542	252	534	219	555	39.1152
10	6	300	0.5	2.49455	460	679	424	649	46.8615
10	6	200	0.5	0.970929	580	196	597	178	24.7588
10	6	300	1	2.47337	217	436	209	420	17.8885
10	6	200	0.5	1.32934	700	452	689	444	13.6015
10	6	100	1	2.99533	546	478	552	458	20.8806
10	6	300	1	2.68009	282	191	271	193	11.1803
10	6	200	2	1.75808	700	316	704	307	9.84886
10	6	100	4	3.08766	414	367	401	370	13.3417
10	6	100	2	1.9908	425	434	451	429	26.4764
10	6	300	4	1.98283	460	89	456	75	14.5602
10	6	300	8	1.47164	772	534	759	568	36.4005
10	6	100	0.5	2.00633	576	461	605	457	29.2746
10	6	200	2	1.43432	444	572	438	544	28.6356
10	6	100	8	3.53793	599	434	548	409	56.7979
10	6	200	0.5	4.13171	383	537	351	550	34.5398
10	6	200	8	3.57307	477	187	445	188	32.0156
10	6	300	2	2.41966	319	154	307	155	12.0416
10	6	100	1	2.60264	610	367	584	393	36.7696
10	6	200	8	2.19772	685	484	692	440	44.5533
10	6	100	4	3.50145	435	320	458	339	29.8329
10	6	100	0.5	1.10706	425	334	456	324	32.573
10	6	200	2	1.88545	383	537	337	557	50.1597
10	6	200	2	2.84414	612	211	618	246	35.5106
10	6	300	8	3.19603	409	102	372	105	37.1214
10	6	200	4	2.81177	412	211	391	184	34.2053
10	6	100	4	3.01879	546	478	523	448	37.8021
10	6	300	8	2.83209	564	679	567	687	8.544
10	6	300	4	6.7488	217	436	219	434	2.82843
11	1	100	0.5	8.77155	576	307	553	345	44.4185
11	1	100	1	7.42319	448	461	460	437	26.8328
11	1	300	8	8.73065	217	332	376	371	163.713
11	1	200	4	2.25312	700	316	677	340	33.2415
11	1	300	2	4.34489	807	332	807	357	25
11	1	100	0.5	2.81365	606	350	621	360	18.0278
11	1	100	0.5	3.15353	610	367	627	371	17.4642
11	1	100	4	2.56188	414	401	385	431	41.7253
11	1	200	4	2.10068	700	452	706	476	24.7386
11	1	100	8	2.51155	606	350	624	357	19.3132
11	1	300	4	5.78411	564	679	586	724	50.0899
11	1	100	1	2.41201	529	286	531	284	2.82843
11	1	200	4	2.51388	685	484	665	501	26.2488
11	1	200	2	2.81952	612	211	626	221	17.2047
11	1	200	0.5	3.25205	665	255	702	271	40.3113
11	1	200	8	2.61705	547	187	557	187	10
11	1	300	1	3.287	772	234	813	269	53.9073
11	1	300	2	4.03191	794	487	826	524	48.9183
11	1	300	2	3.00446	252	534	258	558	24.7386
11	1	300	0.5	5.77698	319	614	330	665	52.1728
11	1	200	2	2.05239	685	484	702	520	39.8121
11	1	300	1	1.83192	662	124	645	128	17.4642
11	1	100	0.5	3.87518	589	320	601	329	15
11	1	200	1	3.19167	359	513	350	546	34.2053
11	1	300	2	5.11275	460	679	483	703	33.2415
11	1	200	4	2.497	665	513	715	589	90.9725
11	1	100	8	2.44384	418	418	414	444	26.3059
11	1	300	8	3.23584	807	436	833	453	31.0644
11	1	100	8	2.58657	425	334	420	336	5.38516
11	1	200	1	2.15322	315	349	308	370	22.1359
11	2	300	2	13.2047	662	644	543	319	346.101
11	2	100	1	1.7815	448	461	435	482	24.6982
11	2	100	8	3.16844	495	286	471	294	25.2982
11	2	100	4	3.76665	435	320	384	351	59.6825
11	2	200	8	9.65965	612	211	523	381	191.888
11	2	300	4	2.71547	252	534	271	601	69.6419
11	2	200	4	2.67784	547	187	559	198	16.2788
11	2	100	8	3.16916	478	478	478	535	57
11	2	300	8	3.1431	252	534	340	561	92.0489
11	2	200	4	2.86821	700	316	678	318	22.0907
11	2	200	0.5	4.05425	315	349	304	355	12.53
11	2	300	0.5	4.25387	409	666	431	681	26.6271
11	2	300	2	2.25581	662	124	639	160	42.72
11	2	200	4	2.26868	547	581	552	663	82.1523
11	2	100	1	3.16065	546	290	543	291	3.16228
11	2	100	1	2.61011	425	434	394	461	41.1096
11	2	300	1	2.93841	662	124	636	185	66.3099
11	2	300	8	1.69156	742	577	739	602	25.1794
11	2	200	2	2.85244	685	284	699	285	14.0357
11	2	200	0.5	3.96245	580	196	590	223	28.7924
11	2	200	2	2.09135	665	255	677	274	22.4722
11	2	300	4	1.99541	742	191	747	217	26.4764
11	2	300	0.5	4.02807	564	679	643	261	425.4
11	2	100	8	3.03127	425	334	409	325	18.3576
11	2	200	1	3.48253	359	513	351	527	16.1245
11	2	300	0.5	2.74098	230	281	269	273	39.8121
11	2	200	1	2.82063	324	452	296	451	28.0179
11	2	100	2	1.93143	495	482	510	483	15.0333
11	2	100	0.5	2.34961	418	350	412	339	12.53
11	2	100	2	2.48407	448	307	439	292	17.4929
11	3	100	2	3.981	425	334	404	367	39.1152
11	3	200	0.5	3.71384	477	581	479	598	17.1172
11	3	300	8	2.81083	742	191	668	230	83.6481
11	3	100	4	104.723	546	290	540	383	93.1933
11	3	300	1	2.8013	409	102	380	120	34.1321
11	3	200	4	3.25363	324	452	323	520	68.0074
11	3	200	2	4.56089	383	231	377	249	18.9737
11	3	300	0.5	2.70025	772	534	776	553	19.4165
11	3	200	2	1.67317	665	255	696	248	31.7805
11	3	200	8	2.52735	665	513	739	532	76.4003
11	3	200	8	3.26211	547	581	551	596	15.5242
11	3	300	1	3.25575	409	666	401	703	37.855
11	3	200	1	2.22745	709	419	731	429	24.1661
11	3	100	4	2.88	529	482	543	500	22.8035
11	3	100	0.5	2.5412	529	482	528	484	2.23607
11	3	100	8	1.96362	529	482	539	493	14.8661
11	3	200	2	2.44772	547	187	532	213	30.0167
11	3	100	8	3.66945	606	350	596	338	15.6205
11	3	200	2	2.45616	383	537	376	561	25
11	3	100	0.5	2.67081	599	334	595	312	22.3607
11	3	100	2	3.33839	462	297	411	290	51.4782
11	3	300	8	2.563	564	679	603	726	61.0737
11	3	300	1	3.1544	460	679	492	703	40
11	3	100	0.5	2.55808	414	367	397	365	17.1172
11	3	300	1	2.49534	230	487	266	518	47.5079
11	3	300	4	5.22771	282	191	307	233	48.8774
11	3	200	4	1.5197	444	196	431	181	19.8494
11	3	100	4	2.30142	418	418	376	448	51.614
11	3	300	0.5	2.05153	705	614	728	661	52.3259
11	3	300	1	2.10366	460	679	473	682	13.3417
11	4	300	4	2.85007	705	614	733	619	28.4429
11	4	100	2	2.06129	435	448	426	449	9.05539
11	4	300	4	2.34904	362	124	354	127	8.544
11	4	200	4	2.6588	383	231	349	227	34.2345
11	4	200	1	1.86643	665	255	697	284	43.1856
11	4	200	0.5	1.8697	315	419	296	444	31.4006
11	4	100	1	1.79282	448	461	439	476	17.4929
11	4	200	8	2.94355	477	187	462	198	18.6011
11	4	300	2	1.9506	705	614	706	662	48.0104
11	4	300	2	2.28388	807	332	825	350	25.4558
11	4	300	2	2.14187	807	436	854	473	59.8164
11	4	100	1	1.78503	478	478	455	488	25.0799
11	4	200	1	1.91757	547	581	558	602	23.7065
11	4	300	0.5	1.93323	662	644	669	669	25.9615
11	4	300	4	2.1656	319	614	319	650	36
11	4	200	0.5	1.76537	339	484	345	486	6.32456
11	4	100	2	2.53894	478	478	471	477	7.07107
11	4	200	8	2.29245	641	231	638	245	14.3178
11	4	100	4	1.72874	414	401	367	434	57.4282
11	4	100	8	1.83571	589	320	626	327	37.6563
11	4	100	0.5	2.21191	589	320	593	325	6.40312
11	4	200	8	1.54765	383	231	376	244	14.7648
11	4	100	0.5	2.12376	495	482	482	484	13.1529
11	4	300	1	2.0718	362	644	381	703	61.9839
11	4	100	4	15.2694	425	334	504	528	209.468
11	4	100	8	1.50361	546	290	585	281	40.025
11	4	200	8	3.14996	700	452	739	499	61.0737
11	4	300	0.5	2.18238	362	644	361	691	47.0106
11	4	300	2	2.31047	772	234	774	216	18.1108
11	4	200	1	1.76124	315	349	291	345	24.3311
11	5	300	1	2.73817	460	679	474	672	15.6525
11	5	100	0.5	2.62921	448	307	437	295	16.2788
11	5	300	4	3.15124	362	644	379	674	34.4819
11	5	100	2	2.41879	495	482	503	493	13.6015
11	5	300	2	3.20076	319	614	289	637	37.8021
11	5	100	4	3.17954	478	290	475	282	8.544
11	5	300	1	2.56579	319	614	325	648	34.5254
11	5	100	4	3.16549	606	350	640	311	51.7397
11	5	200	4	2.78643	412	557	408	568	11.7047
11	5	200	1	2.4568	709	349	702	353	8.06226
11	5	100	2	2.48463	529	482	550	505	31.1448
11	5	100	8	2.46896	425	334	451	325	27.5136
11	5	300	0.5	3.94179	362	644	367	664	20.6155
11	5	100	8	2.51319	448	461	454	481	20.8806
11	5	300	0.5	1.94095	615	102	609	125	23.7697
11	5	100	0.5	2.00392	414	401	416	426	25.0799
11	5	200	8	1.45421	412	557	404	563	10
11	5	200	2	3.57007	709	349	688	362	24.6982
11	5	200	8	2.74545	700	452	690	498	47.0744
11	5	200	0.5	1.58381	547	187	562	176	18.6011
11	5	200	8	2.77164	580	572	607	597	36.7967
11	5	200	2	2.65629	700	316	724	291	34.6554
11	5	300	8	2.70097	705	154	639	198	79.3221
11	5	100	0.5	1.55518	418	418	385	447	43.9318
11	5	100	1	1.73272	546	290	555	274	18.3576
11	5	300	4	1.69443	807	436	710	524	130.969
11	5	300	2	1.73184	252	534	279	571	45.8039
11	5	300	4	3.81402	564	89	589	103	28.6531
11	5	200	1	2.15572	444	572	501	581	57.7062
11	5	200	1	2.2633	685	484	702	527	46.2385
11	6	200	4	1.95142	685	284	735	299	52.2015
11	6	200	8	2.05733	324	452	308	485	36.6742
11	6	200	0.5	2.46852	685	484	723	522	53.7401
11	6	200	8	2.78683	580	196	626	251	71.7008
11	6	100	2	1.88164	546	478	582	492	38.6264
11	6	100	1	2.24374	562	471	565	473	3.60555
11	6	100	0.5	1.32403	606	418	648	419	42.0119
11	6	100	1	2.21705	462	471	455	476	8.60233
11	6	300	0.5	2.00343	662	124	634	151	38.8973
11	6	300	0.5	3.23938	252	234	276	249	28.3019
11	6	300	4	1.85628	230	487	240	526	40.2616
11	6	200	2	2.00423	324	316	322	327	11.1803
11	6	100	2	1.95786	425	334	457	327	32.7567
11	6	200	1	1.16919	700	452	741	478	48.5489
11	6	300	8	1.85476	230	487	250	540	56.648
11	6	300	8	3.04918	615	666	685	714	84.8764
11	6	100	0.5	1.25755	546	290	557	281	14.2127
11	6	200	2	1.53618	339	484	375	493	37.108
11	6	200	4	2.12215	612	211	605	226	16.5529
11	6	100	8	2.29382	425	334	421	318	16.4924
11	6	300	2	2.9387	282	577	255	632	61.2699
11	6	300	2	2.94831	564	679	580	685	17.088
11	6	300	0.5	1.96385	282	577	282	597	20
11	6	200	4	2.66679	547	187	560	220	35.4683
11	6	300	1	2.82774	460	89	432	128	48.0104
11	6	300	1	1.50166	772	234	776	253	19.4165
11	6	100	4	2.34638	546	290	547	293	3.16228
11	6	200	8	2.19968	685	284	634	313	58.6686
11	6	100	1	3.49894	478	290	441	288	37.054
11	6	100	4	3.10363	448	307	367	315	81.3941
12	1	100	4	2.34243	562	297	577	325	31.7648
12	1	200	2	2.97866	665	513	632	533	38.5876
12	1	300	4	3.1573	282	191	276	194	6.7082
12	1	200	8	3.79892	641	231	648	228	7.61577
12	1	300	8	3.84145	252	234	217	184	61.0328
12	1	200	0.5	3.93027	709	419	679	458	49.2037
12	1	100	2	4.06837	418	418	429	459	42.45
12	1	100	8	3.69151	478	478	421	507	63.9531
12	1	100	1	2.60507	414	401	374	432	50.6063
12	1	100	0.5	3.84104	462	297	434	308	30.0832
12	1	100	0.5	3.94727	610	367	577	384	37.1214
12	1	300	0.5	4.54712	615	102	604	103	11.0454
12	1	200	1	3.35202	477	581	448	580	29.0172
12	1	300	4	3.53232	794	487	731	575	108.227
12	1	300	1	4.49291	794	281	779	280	15.0333
12	1	100	8	2.88132	418	350	369	327	54.1295
12	1	200	2	3.41657	700	452	655	472	49.2443
12	1	300	8	3.12725	282	577	308	614	45.2217
12	1	200	8	3.54842	665	255	657	221	34.9285
[truncated: 2,501 more rows]
