# Supplementary material for: A mechanistic insight into sources of error of visual working memory in multiple sclerosis
Source: eLife. 2023 Nov 8;12:RP87442. doi: 10.7554/eLife.87442 (PMC10631758; doi:10.7554/eLife.87442)
Supplement: Source data 2. [file elife-87442-data2.xlsx]

## Sheet: Healthy
Subject_ID	Block_ID	Response_Error (degree)	Reaction_Time (seconds)	Target_Bar	Bar_1_Orientation (degree)	Bar_2_Orientation (degree)	Bar_3_Orientation (degree)	Target_Bar_Orientation (degree)	Subject_Response_Orientation (degree)
1	1	20.8477	5.6604	2	227	307	157	307	147.848
1	1	2.16235	4.85417	2	242	232	272	232	54.1623
1	1	15.7449	3.7764	3	36	16	76	76	60.2551
1	1	27.1753	2.9613	3	156	246	226	226	18.8247
1	1	7.35402	3.09804	1	215	155	305	215	27.646
1	1	0.319617	3.82925	2	133	193	213	193	12.6804
1	1	12.1755	4.78334	3	172	162	272	272	79.8245
1	1	32.3231	5.03215	2	198	168	308	168	20.3231
1	1	10.1247	4.20586	2	189	169	209	169	158.875
1	1	6.96249	3.84687	3	308	348	298	298	111.038
1	1	24.8014	3.71327	1	177	27	67	177	21.8014
1	1	0.709954	3.54491	2	150	160	240	160	160.71
1	1	56.4692	4.5253	1	110	190	160	110	53.5308
1	1	2.12502	4.81727	2	270	230	220	230	52.125
1	1	8.8699	3.31927	3	178	88	118	118	126.87
1	1	7.28688	4.69114	3	257	317	297	297	124.287
1	1	10.5377	5.18586	1	155	265	215	155	144.462
1	1	9.24883	3.11921	1	290	280	250	290	119.249
1	1	46.6294	2.8592	1	337	237	177	337	23.6294
1	1	13.5597	4.10546	3	176	76	116	116	129.56
1	1	11.2902	2.25731	3	237	127	117	117	128.29
1	1	5.69007	2.91196	1	163	263	183	163	168.69
1	1	1.46232	6.38366	2	177	307	287	307	125.538
1	1	18.2724	4.80038	2	302	242	292	242	80.2724
1	1	3.27242	4.10588	1	167	217	177	167	170.272
1	1	14.6522	3.1214	1	124	184	84	124	138.652
1	1	75.2894	3.61316	3	76	166	126	126	50.7106
1	1	13.0362	4.82671	2	74	134	94	134	120.964
1	1	23.0546	2.51682	1	84	164	144	84	60.9454
1	1	3.86581	2.72045	3	179	209	309	309	125.134
1	2	6.01836	2.79661	1	216	326	316	216	29.9816
1	2	8.65929	3.4416	2	212	132	162	132	123.341
1	2	15.2749	1.99974	1	72	182	102	72	56.7251
1	2	7	2.76148	3	272	292	142	142	135
1	2	11.6197	2.94978	3	279	229	179	179	10.6197
1	2	32.3099	3.06609	1	159	259	169	159	11.3099
1	2	15.5792	2.57715	3	45	85	105	105	120.579
1	2	4.72631	2.03424	1	133	233	253	133	137.726
1	2	17.7449	3.34371	1	33	53	153	33	15.2551
1	2	15.4692	2.90022	2	214	204	244	204	8.53077
1	2	15.1986	2.35963	3	192	212	172	172	156.801
1	2	8.80141	2.27993	2	133	103	3	103	111.801
1	2	23.7363	3.86683	3	195	255	215	215	58.7363
1	2	18.6609	3.19742	3	234	194	284	284	122.661
1	2	8.9454	1.89062	3	253	153	263	263	74.0546
1	2	14.6901	1.87398	3	49	179	19	19	33.6901
1	2	6.89727	1.97292	1	204	214	164	204	17.1027
1	2	25.1301	2.40166	2	18	28	148	28	53.1301
1	2	9.07357	3.95487	2	117	97	167	97	106.074
1	2	13.5651	1.87535	2	198	238	108	238	71.5651
1	2	0.125016	2.41028	2	147	187	197	187	7.12502
1	2	0	5.97607	1	180	120	130	180	0
1	2	28	3.69684	3	303	293	343	343	135
1	2	4.98721	2.58812	1	143	153	273	143	138.013
1	2	2.3925	2.81716	2	219	169	159	169	166.608
1	2	4.28941	3.22313	1	190	180	170	190	5.71059
1	2	15.5686	3.07304	3	148	118	158	158	142.431
1	2	5.42957	3.01992	2	116	26	186	26	31.4296
1	2	8.38594	2.94562	1	141	61	41	141	132.614
1	2	82.4208	2.02991	2	197	157	257	157	59.4208
1	3	12.6992	2.51233	3	46	76	86	86	73.3008
1	3	0.434949	2.59568	2	152	162	122	162	161.565
1	3	31.1849	2.22478	3	258	168	198	198	49.1849
1	3	3.62938	2.25889	3	110	220	200	200	23.6294
1	3	5.56505	2.47358	1	156	146	126	156	161.565
1	3	6	1.96429	3	229	109	219	219	45
1	3	12.1301	2.56104	1	176	26	166	176	8.1301
1	3	1.34019	2.14956	3	235	125	95	95	96.3402
1	3	2.46232	3.51388	1	187	127	147	187	9.46232
1	3	4.92754	3.74543	2	186	236	206	236	51.0725
1	3	15.4054	2.06968	2	162	202	32	202	37.4054
1	3	49.1957	5.64874	1	152	132	212	152	102.804
1	3	42.7585	2.54698	2	305	195	255	195	152.241
1	3	25.1892	2.90305	2	106	216	146	216	61.1892
1	3	1.1363	2.75817	1	71	111	21	71	69.8637
1	3	30.1524	2.60696	1	193	163	133	193	43.1524
1	3	1.57784	2.69676	2	277	197	157	197	15.4222
1	3	1.31121	2.62823	3	116	56	146	146	144.689
1	3	13.2737	2.58167	2	119	209	49	209	42.2737
1	3	1.4321	3.03877	3	50	70	90	90	88.5679
1	3	12.6538	2.59692	1	83	133	63	83	70.3462
1	3	19.4623	1.99413	1	100	90	110	100	80.5377
1	3	7	2.66323	2	188	128	208	128	135
1	3	4.00798	2.34191	1	231	251	311	231	55.008
1	3	2.96249	2.48221	3	109	199	249	249	66.0375
1	3	1.81529	2.08157	3	211	121	231	231	52.8153
1	3	18.2986	3.83275	1	220	250	160	220	58.2986
1	3	12.5571	2.3384	2	251	131	261	131	118.443
1	3	2.69007	2.8425	3	306	246	256	256	78.6901
1	3	2.36749	1.91293	2	124	144	204	144	141.633
1	4	9.17901	3.5035	3	220	250	170	170	160.821
1	4	3.19573	2.2916	3	59	159	29	29	32.1957
1	4	2.55226	2.91229	2	116	246	126	246	68.5523
1	4	4.62938	2.27095	3	91	101	71	71	66.3706
1	4	7.80557	2.59361	1	212	222	142	212	39.8056
1	4	18.7751	1.96691	1	84	154	134	84	65.2249
1	4	8.46232	3.46744	2	244	134	174	134	125.538
1	4	12.8263	2.44249	1	142	52	192	142	129.174
1	4	10.6199	2.86456	3	238	158	168	168	157.38
1	4	71.646	5.70315	1	134	184	74	134	62.354
1	4	11.7462	1.59427	1	93	63	203	93	81.2538
1	4	6.19573	2.92746	3	134	224	154	154	147.804
1	4	7.35775	3.49586	2	142	112	162	112	119.358
1	4	9.52557	2.33088	2	152	262	212	262	72.4744
1	4	8.03026	3.00329	2	48	148	128	148	139.97
1	4	1.12502	2.27668	1	231	251	211	231	52.125
1	4	47	5.23963	2	77	47	137	47	0
1	4	1.01128	2.27766	2	186	246	296	246	67.0113
1	4	27.1975	3.45662	2	152	182	252	182	29.1975
1	4	15.0362	1.93535	3	164	114	44	44	59.0362
1	4	11.4089	3.54333	2	203	193	173	193	1.59114
1	4	0.636577	2.73952	3	291	211	181	181	1.63658
1	4	2.9454	5.57584	3	287	197	167	167	164.055
1	4	17.3099	4.03276	3	264	324	174	174	11.3099
1	4	24.6955	1.67497	1	139	229	149	139	114.305
1	4	29.3764	2.0534	1	234	184	154	234	24.6236
1	4	0.963757	2.13582	3	125	215	165	165	165.964
1	4	14.7398	2.10391	1	211	221	141	211	16.2602
1	4	0.248826	2.31167	1	299	249	289	299	119.249
1	4	6.37913	2.33533	2	184	114	234	114	120.379
1	5	4.55605	3.4298	3	139	219	209	209	24.444
1	5	5.2157	1.99059	2	339	299	219	299	124.216
1	5	11.1986	2.04355	3	288	178	258	258	66.8014
1	5	14.1892	2.37778	3	282	162	182	182	16.1892
1	5	28.6422	3.91509	2	327	347	287	347	15.6422
1	5	63.5686	2.7548	2	234	154	194	154	37.5686
1	5	15.6026	2.12733	2	88	148	108	148	132.397
1	5	9.63251	1.64741	2	272	132	252	132	141.633
1	5	3.7843	2.32995	3	327	317	187	187	10.7843
1	5	10	2.63416	1	215	285	195	215	45
1	5	0.405357	1.88033	3	127	137	217	217	37.4054
1	5	0.250506	1.78378	1	114	254	174	114	113.749
1	5	10.7131	2.72039	1	135	215	175	135	124.287
1	5	9.08562	2.66024	1	320	160	190	320	130.914
1	5	2.43495	3.39486	1	196	306	206	196	18.4349
1	5	17.1986	2.27211	3	174	254	264	264	66.8014
1	5	80.4208	5.89883	2	66	156	196	156	75.5792
1	5	11.6192	1.9503	1	339	269	219	339	147.381
1	5	17.9887	2.21856	2	155	95	65	95	112.989
1	5	2.80141	1.97635	3	126	156	26	26	23.1986
1	5	6.11483	2.04135	1	71	111	41	71	64.8852
1	5	7.34019	3.06363	3	284	194	314	314	141.34
1	5	18.3048	2.36653	2	287	217	147	217	55.3048
1	5	6.16126	2.07533	3	165	85	105	105	111.161
1	5	7.23636	2.09401	3	87	107	147	147	139.764
1	5	11.56	2.66511	1	31	61	91	31	19.44
1	5	10.5014	1.6401	1	79	239	119	79	68.4986
1	5	33.8025	2.01445	2	277	207	297	207	60.8025
1	5	7.53665	2.54002	2	143	123	83	123	115.463
1	5	13.6156	1.83231	1	140	160	210	140	126.384
1	6	4.39871	2.35612	3	140	250	180	180	4.39871
1	6	3.58194	2.53282	1	177	67	117	177	173.418
1	6	3.60282	1.89657	3	145	95	85	85	88.6028
1	6	6.78389	3.31591	3	156	76	236	236	62.7839
1	6	5.49564	1.61572	1	67	157	97	67	61.5044
1	6	11.3814	2.19748	1	87	207	177	87	75.6186
1	6	24.0948	3.03492	2	117	237	247	237	32.9052
1	6	2.30993	2.59285	2	186	126	226	126	123.69
1	6	11.5651	2.3982	3	35	45	165	165	153.435
1	6	1.89055	1.9439	1	66	106	146	66	67.8906
1	6	15.3474	2.62008	1	197	137	117	197	32.3474
1	6	10.6156	2.56173	1	133	153	163	133	143.616
1	6	12.2026	2.35426	2	295	125	245	125	137.203
1	6	3.30076	1.38693	3	140	60	70	70	73.3008
1	6	22.2176	2.9601	2	197	167	287	167	144.782
1	6	0.398705	3.36899	2	59	139	69	139	139.399
1	6	15.125	3.75746	3	267	217	307	307	142.125
1	6	2.80141	1.78189	3	266	276	206	206	23.1986
1	6	16.2551	2.8148	1	179	209	109	179	15.2551
1	6	14.6209	3.20458	1	135	255	115	135	120.379
1	6	15.4054	2.08598	3	98	158	248	248	52.5946
1	6	4.5198	4.19721	2	152	182	72	182	6.5198
1	6	12.3008	2.00261	1	254	134	214	254	61.6992
1	6	19.2648	3.33199	1	232	182	272	232	32.7352
1	6	1.337	3.508	2	204	184	214	184	2.663
1	6	14.6598	1.82775	3	226	156	246	246	51.3402
1	6	9.81508	2.84558	2	101	121	111	121	130.815
1	6	3.27444	2.13605	3	144	164	204	204	20.7256
1	6	22.8025	2.2961	2	188	218	78	218	60.8025
1	6	10.0926	2.51533	2	163	203	223	203	12.9074
2	1	12.5651	27.4151	2	256	166	276	166	153.435
2	1	49.3045	12.7575	3	253	323	193	193	143.696
2	1	30.9228	10.8583	1	245	135	175	245	34.0772
2	1	24.8624	6.15464	1	203	113	123	203	47.8624
2	1	0.602819	3.75635	2	278	268	228	268	88.6028
2	1	5.86241	3.70853	3	123	183	273	273	87.1376
2	1	72.6366	14.6125	3	284	194	244	244	136.637
2	1	44.427	3.22557	1	261	231	301	261	36.573
2	1	44.6237	3.19545	2	150	210	130	210	74.6237
2	1	19.9264	5.45699	3	171	241	81	81	61.0736
2	1	56.3706	5.19916	2	230	190	140	190	66.3706
2	1	39.7683	4.63236	1	197	147	307	197	56.7683
2	1	5.72631	3.05853	3	188	328	228	228	42.2737
2	1	12.6236	5.28091	1	102	132	262	102	114.624
2	1	6.77783	5.55218	3	328	178	208	208	34.7778
2	1	4	6.06429	3	111	271	221	221	45
2	1	12.7639	4.82306	2	53	123	23	123	135.764
2	1	35.8545	3.32905	3	190	130	30	30	65.8545
2	1	3.4802	5.24885	2	215	305	225	305	128.48
2	1	2.92754	4.6194	2	144	234	224	234	51.0725
2	1	0.663001	3.38524	1	92	192	162	92	92.663
2	1	0.573126	6.33008	1	289	159	309	289	109.573
2	1	1.97493	8.40999	3	150	100	90	90	88.0251
2	1	53	3.65512	2	153	143	113	143	90
2	1	0.417055	4.25792	1	145	155	195	145	144.583
2	1	2.34645	7.34433	2	309	179	219	179	1.34645
2	1	50.6336	4.05241	3	99	209	129	129	78.3664
2	1	2.65981	13.6904	2	106	36	76	36	38.6598
2	1	48.3227	11.9853	1	214	164	134	214	165.677
2	1	74.0096	4.93798	1	72	162	152	72	177.99
2	2	20.9744	21.4336	2	150	140	160	140	160.974
2	2	12.8637	11.8547	1	327	307	167	327	159.864
2	2	11.9881	12.2891	1	186	146	106	186	174.012
2	2	24.0284	3.86338	3	318	258	298	298	142.028
2	2	28.3474	6.26229	2	154	184	234	184	32.3474
2	2	36	1.2685	1	234	304	154	234	90
2	2	33.8056	3.70802	2	101	141	211	141	174.806
2	2	12.3764	3.82327	1	143	173	93	143	155.376
2	2	24.0128	6.20922	3	136	116	156	156	131.987
2	2	53	1.51033	1	217	207	147	217	90
2	2	51.5342	4.53387	2	307	277	337	277	45.4658
2	2	42.6609	3.54988	1	235	185	155	235	12.3391
2	2	28.1169	4.68195	3	169	229	189	189	37.1169
2	2	78	1.5132	3	112	62	192	192	90
2	2	57.727	2.92882	1	239	259	229	239	1.27303
2	2	30.1726	3.92098	2	222	242	102	242	31.8274
2	2	24	2.20469	2	304	294	214	294	90
2	2	1.09582	3.6383	2	176	236	196	236	54.9042
2	2	33.4088	4.57245	3	177	127	267	267	53.5912
2	2	7.30861	3.94533	3	101	21	191	191	3.69139
2	2	13.0809	4.19742	1	147	67	197	147	133.919
2	2	15.5226	2.92257	2	166	246	206	246	50.4774
2	2	22.6955	2.93415	3	122	262	272	272	69.3045
2	2	1.81571	2.73449	2	171	241	161	241	59.1843
2	2	1.43665	3.52652	3	61	71	181	181	2.43665
2	2	12.1455	3.0983	3	138	208	78	78	65.8545
2	2	27.3402	3.92558	1	24	34	44	24	51.3402
2	2	45.4222	3.28142	1	195	265	205	195	60.4222
2	2	7.03086	3.18452	2	210	110	220	110	117.031
2	2	88.2856	3.58558	3	199	79	159	159	67.2856
2	3	5.37913	9.62464	2	110	70	200	70	75.3791
2	3	14.9541	6.60192	3	44	34	184	184	169.046
2	3	10	4.10698	3	230	220	190	190	0
2	3	7.27303	5.77884	1	231	71	91	231	43.727
2	3	16.6897	4.13953	1	110	160	60	110	126.69
2	3	2.71059	5.19203	2	298	228	218	228	50.7106
2	3	15.0611	4.92522	3	22	112	192	192	27.0611
2	3	6	5.29238	2	254	174	264	174	0
2	3	62.5482	4.42379	1	241	141	191	241	178.452
2	3	76.8202	7.55371	2	115	55	65	55	131.82
2	3	1.20577	3.29005	1	309	269	219	309	130.206
2	3	3.41187	3.7453	1	223	253	233	223	39.5881
2	3	7.78436	3.85359	2	131	121	271	121	128.784
2	3	3	5.08785	3	123	113	183	183	0
2	3	89	2.08689	2	239	179	229	179	90
2	3	62.3008	5.45393	1	214	324	284	214	151.699
2	3	35.427	4.57612	2	137	207	107	207	171.573
2	3	47	1.14514	3	133	173	223	223	90
2	3	14.1715	3.62985	3	167	267	137	137	122.829
2	3	2.19061	3.17555	2	194	124	114	124	121.809
2	3	13.0643	2.68063	3	239	219	209	209	42.0643
2	3	15.059	2.75186	1	324	234	334	324	128.941
2	3	2.98582	3.32021	3	208	218	128	128	130.986
2	3	0.694647	5.74007	1	269	219	149	269	88.3054
2	3	3	1.83228	3	147	17	87	87	90
2	3	39.8503	3.25824	2	213	203	103	203	62.8503
2	3	1.56859	2.90468	1	216	236	166	216	37.5686
2	3	2.35775	3.96825	1	297	187	257	297	119.358
2	3	1.0546	3.06927	2	142	62	202	62	60.9454
2	3	1.64225	2.63216	3	189	109	59	59	60.6422
2	4	3.65256	3.48467	3	104	84	54	54	57.6526
2	4	23.1009	3.54116	1	197	217	237	197	40.1009
2	4	22.0425	3.24668	2	328	208	218	208	50.0425
2	4	3.80693	4.64331	2	288	318	198	318	134.193
2	4	4.70939	3.66563	3	168	108	128	128	132.709
2	4	11.6335	2.62812	3	270	250	240	240	48.3665
2	4	11.0441	3.71858	1	40	50	130	40	51.0441
2	4	5.17551	3.9702	2	255	85	95	85	79.8245
2	4	6.3948	2.87097	3	251	211	241	241	54.6052
2	4	5.07246	3.21771	1	181	221	251	181	6.07246
2	4	36.1215	3.39944	1	220	190	200	220	3.87852
2	4	32.9144	4.38501	1	323	333	343	323	175.914
2	4	10.6141	3.68988	2	217	167	177	167	177.614
2	4	38.9946	3.15299	3	261	181	251	251	32.0054
2	4	3.04094	3.58561	3	158	88	8	8	11.0409
2	4	5.53507	3.95824	2	243	153	233	153	147.465
2	4	27.6538	3.07076	1	127	97	67	127	154.654
2	4	15.3162	3.28974	2	188	198	68	198	2.68378
2	4	18.4076	5.36885	2	276	216	106	216	17.5924
2	4	19.5651	4.86958	3	87	177	187	187	26.5651
2	4	11.6744	5.27225	3	181	131	171	171	159.326
2	4	87.07	4.39497	1	230	120	240	230	137.07
2	4	11.2176	3.85597	3	116	176	156	156	144.782
2	4	28.3803	5.51466	2	271	321	281	321	169.38
2	4	3.90524	7.19403	2	44	74	184	74	77.9052
2	4	0.92711	2.9429	2	59	139	119	139	139.927
2	4	9.78436	2.73119	3	269	229	299	299	128.784
2	4	0.246321	2.73148	1	143	153	103	143	143.246
2	4	22.3659	3.49158	1	301	261	291	301	143.366
2	4	4.87739	2.60649	1	316	236	286	316	140.877
2	5	24.3045	3.43568	2	182	102	132	102	126.304
2	5	12.4915	3.97006	1	223	103	143	223	55.4915
2	5	3	3.34269	2	268	318	228	318	135
2	5	3.2643	2.85119	3	145	215	185	185	1.7357
2	5	13.9392	2.75746	2	198	58	28	58	44.0608
2	5	38.674	2.85773	2	303	173	263	173	134.326
2	5	10	2.91212	3	95	165	125	125	135
2	5	24.9591	2.74374	1	99	79	179	99	123.959
2	5	11.3524	4.5964	1	176	236	256	176	7.35238
2	5	15.9503	2.8335	3	184	134	124	124	139.95
2	5	14.6013	2.98364	3	114	84	154	154	139.399
2	5	6.08562	3.28072	2	177	227	217	227	40.9144
2	5	2.15969	2.4158	2	202	122	272	122	124.16
2	5	15.2338	2.80559	3	67	77	157	157	141.766
2	5	13.6538	3.62294	3	226	136	186	186	19.6538
2	5	2.84277	2.79294	1	131	261	241	131	128.157
2	5	17.1986	5.75814	2	151	141	191	141	158.199
2	5	42	1.29452	1	228	308	298	228	90
2	5	25	3.76261	1	160	210	190	160	135
2	5	10.0251	3.33084	3	147	157	57	57	46.9749
2	5	1.40934	3.73899	1	133	73	193	133	134.409
2	5	22.5679	2.93098	1	21	61	81	21	43.5679
2	5	39.2643	3.47472	2	126	176	136	176	136.736
2	5	11.4349	3.52603	2	127	97	137	97	108.435
2	5	2.53878	3.26254	3	213	193	63	63	60.4612
2	5	5.85316	3.88551	3	187	227	167	167	161.147
2	5	21.07	3.10008	2	254	244	184	244	42.93
2	5	12	2.57554	3	142	152	102	102	90
2	5	9.49232	3.01624	1	184	164	144	184	174.508
2	5	20	2.99016	1	200	110	120	200	0
2	6	13.1663	3.34123	2	184	144	224	144	157.166
2	6	16.8014	3.04166	2	130	140	220	140	156.801
2	6	29.5691	3.05585	3	316	216	246	246	36.4309
2	6	3.28606	3.002	2	140	160	60	160	156.714
2	6	9.54942	3.44342	3	83	63	133	133	142.549
2	6	0.389835	3.54585	2	171	161	41	161	161.39
2	6	15.1944	4.82991	1	190	160	290	190	174.806
2	6	40.7907	3.60782	1	115	285	165	115	155.791
2	6	9.2397	3.76148	3	86	156	186	186	176.76
2	6	39.2176	3.91774	1	62	82	182	62	22.7824
2	6	0.309932	2.38561	3	114	4	34	34	33.6901
2	6	28.9872	2.25088	2	97	77	67	77	48.0128
2	6	42.6105	2.58918	1	166	246	76	166	28.6105
2	6	14.0679	3.97832	2	118	188	198	188	22.0679
2	6	3.93153	3.42692	3	262	162	182	182	5.93153
2	6	54.4098	3.18108	1	103	143	253	103	157.41
2	6	3.48613	2.44618	3	59	49	29	29	25.5139
2	6	39.1301	2.48022	3	176	156	76	76	36.8699
2	6	11.0478	3.2474	1	218	188	168	218	26.9522
2	6	10.4156	2.6978	3	61	101	161	161	150.584
2	6	13.7749	2.70942	2	119	199	149	199	32.7749
2	6	53.5596	3.28494	1	205	125	145	205	151.44
2	6	12.204	2.70013	1	133	193	73	133	145.204
2	6	33.7263	3.00752	2	106	166	206	166	132.274
2	6	17.2551	1.88869	1	47	77	27	47	29.7449
2	6	5.77433	1.82405	2	155	225	115	225	50.7743
2	6	15.3179	3.38665	3	114	284	174	174	158.682
2	6	43.1094	2.65526	3	196	146	246	246	22.8906
2	6	8.04094	2.60176	2	78	48	198	48	56.0409
2	6	56	1.3232	1	214	154	304	214	90
3	1	14.2072	2.34885	1	115	125	225	115	129.207
3	1	14.7321	1.97279	2	76	26	66	26	40.7321
3	1	28.5308	1.85791	2	215	65	225	65	36.4692
3	1	11.9716	2.94445	2	16	26	56	26	37.9716
3	1	0.855214	1.82073	3	279	149	289	289	109.855
3	1	3.14434	2.15446	2	123	103	43	103	106.144
3	1	15.9704	2.34705	2	62	42	92	42	26.0296
3	1	10.8787	1.47153	1	142	132	122	142	152.879
3	1	21.0128	1.82641	2	303	243	153	243	41.9872
3	1	13.8978	4.42814	3	252	152	232	232	65.8978
3	1	37.2914	2.03822	1	233	243	193	233	15.7086
3	1	16.1221	2.12456	1	58	48	138	58	41.8779
3	1	12.4349	2.04043	1	96	106	116	96	108.435
3	1	3.56505	3.07057	3	333	233	203	203	26.5651
3	1	32.0184	2.46553	3	113	193	73	73	105.018
3	1	4.46232	3.07225	3	85	135	5	5	9.46232
3	1	29.444	2.75498	1	230	160	180	230	20.556
3	1	8.50353	1.78763	3	110	160	220	220	48.5035
3	1	3.78897	2.16874	1	93	83	153	93	96.789
3	1	39.8699	2.50947	1	42	62	82	42	81.8699
3	1	6.09476	1.78896	2	99	129	119	129	122.905
3	1	18.5739	1.93859	1	121	181	211	121	139.574
3	1	1.19443	1.7823	3	226	56	176	176	174.806
3	1	3.54816	2.4315	2	48	178	158	178	1.54816
3	1	3.17551	2.64124	3	57	117	97	97	100.176
3	1	14.211	1.95129	3	235	95	265	265	99.211
3	1	0.380345	2.80821	2	39	169	49	169	169.38
3	1	3.32869	2.12155	3	337	267	287	287	103.671
3	1	56.4328	2.1575	2	151	171	251	171	114.567
3	1	83.9749	1.92621	1	143	243	303	143	46.9749
3	2	25.5704	2.51529	1	147	237	77	147	121.43
3	2	19.6425	2.19912	1	208	58	138	208	47.6425
3	2	3.26451	2.06433	3	76	66	56	56	59.2645
3	2	1.74488	3.00719	2	168	208	98	208	29.7449
3	2	10.5924	1.24869	3	317	187	277	277	107.592
3	2	1.99584	3.60322	3	100	70	110	110	108.004
3	2	1.47443	2.22872	2	269	289	259	289	107.526
3	2	14.9275	1.61473	3	154	84	24	24	38.9275
3	2	22.1663	2.25214	3	175	215	225	225	67.1663
3	2	87.6141	2.8776	1	270	170	160	270	177.614
3	2	24.9694	2.29829	2	292	172	182	172	147.031
3	2	1	2.10919	3	171	121	181	181	0
3	2	1.95755	1.41265	1	218	328	258	218	39.9575
3	2	19.4537	1.67417	2	211	71	201	71	51.5463
3	2	72.4623	3.19737	2	62	162	92	162	54.4623
3	2	28.5704	1.21854	3	160	40	150	150	121.43
3	2	22.8534	1.47234	1	196	256	226	196	38.8534
3	2	7.65981	1.93935	1	59	129	29	59	51.3402
3	2	10.3987	3.34363	1	129	219	139	129	139.399
3	2	3.00798	2.13193	3	253	293	173	173	169.992
3	2	34.7495	2.12377	2	184	124	154	124	158.749
3	2	1	1.46381	1	91	31	201	91	90
3	2	24.1027	2.15077	2	242	142	272	142	117.897
3	2	39.6366	2.90319	2	203	263	223	263	43.3634
3	2	5.80594	1.55463	2	278	288	208	288	113.806
3	2	12.0577	2.0912	3	158	138	128	128	115.942
3	2	6.32314	2.6582	2	81	121	171	121	114.677
3	2	25.4349	1.40907	1	142	212	312	142	116.565
3	2	16.9745	1.23422	3	250	200	230	230	66.9745
3	2	13.8025	1.90465	1	313	233	293	313	119.197
3	3	11	1.74898	3	274	194	214	214	45
3	3	9.96249	2.0931	3	276	156	256	256	66.0375
3	3	12.29	1.64055	2	137	97	107	97	109.29
3	3	13.6071	1.7908	2	63	203	133	203	36.6071
3	3	29.008	1.556	2	94	64	24	64	34.992
3	3	54.8014	3.07697	3	2	52	12	12	66.8014
3	3	2.38139	2.32774	2	68	78	188	78	75.6186
3	3	30.6997	1.56747	2	220	180	280	180	30.6997
3	3	20.9638	1.31641	2	210	100	240	100	120.964
3	3	5.2026	2.68037	1	132	172	152	132	137.203
3	3	9.03624	1.79154	3	115	145	275	275	104.036
3	3	6.38068	1.6684	2	224	244	144	244	57.6193
3	3	3.38014	2.09573	1	244	284	174	244	67.3801
3	3	12.8014	2.34705	1	261	151	211	261	68.1986
3	3	0.471192	2.19913	3	292	312	212	212	32.4712
3	3	22.5044	2.05662	2	89	219	249	219	61.5044
3	3	0.781125	1.76725	1	178	148	238	178	178.781
3	3	0.529706	1.91641	1	150	110	210	150	149.47
3	3	15.6861	2.16825	3	258	108	148	148	163.686
3	3	22.2869	1.21275	3	247	187	147	147	169.287
3	3	13.6593	1.32254	1	227	167	307	227	33.3407
3	3	3.46223	1.25465	3	167	177	217	217	40.4622
3	3	17.7251	1.8332	2	131	51	211	51	33.2749
3	3	7.07536	1.66314	1	206	176	146	206	18.9246
3	3	5.87533	1.78202	2	169	209	139	209	34.8753
3	3	22.5923	1.64711	3	212	202	222	222	64.5923
3	3	22.3008	1.30554	3	216	306	276	276	118.301
3	3	5.42608	1.33692	1	145	165	225	145	139.574
3	3	25.4957	1.60935	1	147	227	157	147	121.504
3	3	31.7098	2.53105	1	155	175	225	155	6.70984
3	4	2.92751	1.26941	3	71	141	211	211	28.0725
3	4	12.5014	0.95203	3	141	71	81	81	68.4986
3	4	1.38594	1.38416	1	224	134	54	224	42.6141
3	4	19.2364	1.40946	1	210	280	170	210	49.2364
3	4	20.6992	5.09531	2	94	184	104	184	163.301
3	4	25.3893	1.20282	2	115	25	175	25	50.3893
3	4	20.7778	1.23625	1	194	144	214	194	34.7778
3	4	22.0416	1.12255	1	114	144	94	114	136.042
3	4	24.0113	1.60632	1	133	203	183	133	157.011
3	4	5.22775	1.48366	3	244	324	334	334	159.228
3	4	6.50852	1.14369	3	83	143	163	163	169.509
3	4	10.8285	1.62371	2	178	158	128	158	147.171
3	4	18.5085	1.12131	1	106	126	206	106	124.509
3	4	11.5308	1.46121	3	147	197	267	267	98.5308
3	4	21.8699	2.85172	3	135	35	165	165	143.13
3	4	25.1726	1.3902	3	138	128	168	168	13.1726
3	4	40.1798	1.44328	1	188	128	118	188	48.1798
3	4	16.875	2.64147	2	171	291	141	291	127.875
3	4	27.875	1.56799	2	150	170	230	170	142.125
3	4	4.0679	1.62069	2	202	162	232	162	157.932
3	4	9.12502	1.73855	1	137	227	207	137	127.875
3	4	16.1211	1.58298	2	161	31	141	31	47.1211
3	4	3.87533	1.44796	1	239	299	349	239	55.1247
3	4	6.14669	0.986987	3	261	151	211	211	37.1467
3	4	6.72511	1.6399	3	250	280	230	230	56.7251
3	4	14.7144	3.0217	2	12	172	42	172	157.286
3	4	13.3106	1.63212	2	200	160	210	160	146.689
3	4	23.4349	1.23398	2	125	185	195	185	161.565
3	4	5.18921	2.32815	3	101	161	191	191	16.1892
3	4	15.2933	1.83217	1	129	199	189	129	144.293
3	5	8.18111	2.00304	3	171	101	71	71	62.8189
3	5	21.1466	1.41269	1	300	170	180	300	141.147
3	5	10.5523	1.32238	2	147	257	237	257	66.4477
3	5	4.18492	1.40623	1	180	170	260	180	175.815
3	5	28.008	1.33578	2	163	153	83	153	124.992
3	5	22.9454	1.56771	3	163	203	83	83	105.945
3	5	8.90972	1.48476	3	177	27	117	117	125.91
3	5	11.0736	1.93987	2	120	230	250	230	61.0736
3	5	16.6199	1.64092	2	116	96	146	96	112.62
3	5	4	1.43043	1	139	159	149	139	135
3	5	13.2551	1.68854	2	297	227	287	227	60.2551
3	5	1.97493	2.21152	1	135	275	285	135	136.975
3	5	7.89909	1.56924	3	193	263	183	183	175.101
3	5	5.40782	3.286	1	163	3	33	163	168.408
3	5	1.69805	1.32581	3	257	137	177	177	178.698
3	5	20.8274	1.09326	3	121	131	281	281	121.827
3	5	10.8043	1.19263	3	117	217	137	137	147.804
3	5	2.47029	1.42974	1	168	158	88	168	165.53
3	5	2.56505	1.432	3	191	171	201	201	18.4349
3	5	0.363423	1.64976	2	68	178	48	178	178.363
3	5	3.29016	1.74845	1	190	140	250	190	6.70984
3	5	3.69545	1.57671	1	242	272	152	242	65.6955
3	5	20.273	1.63385	1	206	256	306	206	46.273
3	5	8.77514	1.78407	2	206	106	176	106	114.775
3	5	16.9108	1.69716	1	149	49	189	149	132.089
3	5	10.3045	1.34049	3	156	226	166	166	155.695
3	5	5.53177	1.25698	2	96	216	226	216	41.5318
3	5	8.49148	1.55138	2	27	47	87	47	55.4915
3	5	21.5085	1.24018	2	67	77	207	77	55.4915
3	5	16.6209	1.36645	3	193	233	223	223	59.6209
3	6	3.8637	1.53738	3	199	289	249	249	65.1363
3	6	6.01279	2.5054	2	198	138	278	138	131.987
3	6	48.9872	1.54524	3	173	143	263	263	131.987
3	6	6.59464	1.13355	1	316	276	156	316	142.595
3	6	13.2564	1.35764	3	167	127	107	107	120.256
3	6	12.2317	1.46238	1	69	189	169	69	56.7683
3	6	9.14554	1.49278	2	205	195	165	195	24.1455
3	6	0.427456	1.60841	2	99	119	69	119	119.427
3	6	19.0409	1.63392	2	232	172	222	172	11.0409
3	6	21.5275	1.39264	1	119	129	209	119	140.528
3	6	17.125	1.10157	3	185	285	215	215	52.125
3	6	19.6209	2.83667	3	100	230	220	220	59.6209
3	6	48.9321	1.17463	2	89	19	69	19	67.9321
3	6	9.17146	1.44768	1	228	188	88	228	57.1715
3	6	1.10273	2.0982	2	176	196	116	196	17.1027
3	6	2.14669	2.37363	3	195	115	125	125	127.147
3	6	10.4712	2.28227	2	132	112	222	112	122.471
3	6	76.6901	1.38579	1	47	117	167	47	123.69
3	6	27.1247	1.32256	2	192	242	252	242	34.8753
3	6	15.0546	1.72625	3	136	116	76	76	60.9454
3	6	54.1957	1.26635	2	202	112	102	112	57.8043
3	6	14.5377	1.57687	3	119	149	159	159	144.462
3	6	11.1811	1.01789	3	124	84	74	74	62.8189
3	6	9.46223	1.2518	1	149	109	139	149	139.538
3	6	8.80141	1.2781	3	233	143	103	103	111.801
3	6	0.693795	1.23286	1	247	147	237	247	67.6938
3	6	3	1.90311	1	177	197	217	177	0
3	6	43.8906	1.49079	1	114	144	214	114	157.891
3	6	2.72228	1.64194	1	152	262	132	152	154.722
3	6	12.9691	1.00027	2	185	265	255	265	72.0309
4	1	1.45882	3.0646	1	185	125	115	185	6.45882
4	1	21.6425	2.03073	1	244	234	204	244	42.3575
4	1	1.21888	1.78462	3	155	145	135	135	136.219
4	1	26.6507	2.6017	2	226	86	216	86	59.3493
4	1	18.4208	2.08319	2	276	176	196	176	14.4208
4	1	3.1213	2.97004	2	221	111	141	111	107.879
4	1	6.65067	1.62324	1	114	224	174	114	120.651
4	1	3.60129	2.90484	3	128	178	98	98	94.3987
4	1	10	1.49665	3	200	170	260	260	90
4	1	18.7495	3.84042	1	5	35	25	5	23.7495
4	1	9.06849	2.11056	1	39	29	49	39	29.9315
4	1	22.3008	3.04602	2	136	96	86	96	118.301
4	1	77.211	3.61647	1	96	16	166	96	173.211
4	1	5.59218	3.43002	2	86	186	126	186	11.5922
4	1	3.75854	2.77606	1	156	76	186	156	152.241
4	1	5.23383	2.24923	2	273	123	233	123	128.234
4	1	22.8753	2.26725	3	222	72	102	102	124.875
4	1	13.4349	5.89022	1	95	115	155	95	108.435
4	1	5.91743	1.99342	1	172	242	212	172	177.917
4	1	13.0546	2.81452	3	179	139	119	119	105.945
4	1	26.5651	2.12414	2	215	225	165	225	71.5651
4	1	16.8014	2.91182	1	175	135	165	175	158.199
4	1	4.73523	2.41571	3	192	142	242	242	57.2648
4	1	15.4957	3.49349	3	212	122	92	92	76.5043
4	1	70.4477	2.65673	2	299	319	259	319	68.5523
4	1	21.2553	2.59133	3	206	236	186	186	27.2553
4	1	5.56505	1.68461	3	166	176	246	246	71.5651
4	1	76.1785	2.14773	2	263	133	213	133	56.8215
4	1	1.25512	4.92413	2	159	59	99	59	60.2551
4	1	10.0548	1.57558	3	41	171	211	211	41.0548
4	2	22.0958	2.50881	1	103	63	13	103	125.096
4	2	12.8428	2.69248	2	249	219	339	219	51.8428
4	2	42.2643	2.71163	2	141	91	121	91	133.264
4	2	32.6598	2.39956	1	141	171	151	141	173.66
4	2	4.42957	1.5447	3	107	57	117	117	121.43
4	2	32.7263	1.56546	2	145	165	215	165	132.274
4	2	2.91123	1.4578	3	161	191	131	131	128.089
4	2	7.89079	1.753	3	144	294	204	204	31.8908
4	2	27	1.59347	2	98	198	118	198	45
4	2	1.98311	2.19073	3	182	132	252	252	70.0169
4	2	28.3634	1.65195	3	265	225	345	345	136.637
4	2	27.1524	2.1022	2	316	196	216	196	43.1524
4	2	20.1221	2.07397	2	218	208	308	208	48.1221
4	2	12.2101	2.02863	1	149	129	69	149	136.79
4	2	13.0948	1.87093	1	224	254	124	224	57.0948
4	2	16.6732	1.48979	3	127	147	217	217	53.6732
4	2	0.928474	2.23275	1	201	191	211	201	20.0715
4	2	2.50143	1.93067	1	154	104	254	154	156.501
4	2	2	2.01861	1	88	128	198	88	90
4	2	27.3895	2.62467	3	76	206	146	146	118.61
4	2	6	1.56258	2	226	276	346	276	90
4	2	22.4429	1.75911	2	219	129	189	129	106.557
4	2	16.8477	1.43175	1	221	301	281	221	57.8477
4	2	0.927544	1.55393	1	218	268	338	218	38.9275
4	2	0	0.994579	3	130	140	90	90	90
4	2	13.0935	2.03994	3	279	219	309	309	115.907
4	2	33.4349	1.84581	3	100	80	150	150	116.565
4	2	2.2602	2.22458	2	279	239	209	239	61.2602
4	2	33.7662	1.7225	2	252	162	132	162	128.234
4	2	2.74488	1.32642	1	117	247	227	117	119.745
4	3	33.4712	5.92781	3	331	201	181	181	147.529
4	3	14.3764	2.22747	3	271	201	321	321	155.376
4	3	13.7256	1.73396	3	197	237	97	97	110.726
4	3	51.5288	1.5261	2	236	186	226	186	57.5288
4	3	24.3706	1.80969	1	228	258	188	228	23.6294
4	3	37.1186	1.95965	3	177	137	97	97	134.119
4	3	18.0908	1.82435	3	175	115	205	205	43.0908
4	3	27	1.66628	1	162	72	232	162	135
4	3	8.52881	2.40506	2	196	176	266	176	167.471
4	3	7.03751	1.76615	2	29	149	129	149	156.038
4	3	16.5651	2.05906	1	215	175	185	215	18.4349
4	3	16.0565	3.56976	2	216	156	166	156	172.057
4	3	39.0013	2.81441	2	253	193	233	193	52.0013
4	3	1.12502	1.36416	1	51	221	101	51	52.125
4	3	6.63546	2.63314	3	143	163	223	223	49.6355
4	3	11.4349	1.30287	1	142	132	162	142	153.435
4	3	13.5085	1.61443	2	191	291	201	291	124.509
4	3	7.64255	1.45219	2	50	130	100	130	137.643
4	3	21.1145	1.33476	1	103	63	163	103	124.114
4	3	40.6901	1.93445	3	67	157	187	187	146.31
4	3	36.9872	1.35081	3	275	205	175	175	138.013
4	3	4.96376	1.53542	1	154	134	44	154	149.036
4	3	60.8387	1.14362	1	98	148	238	98	158.839
4	3	19.8664	1.49223	3	186	256	276	276	115.866
4	3	11.2996	2.5594	2	134	164	144	164	152.7
4	3	3.77514	3.52786	1	204	314	214	204	20.2249
4	3	7.45184	1.67994	2	114	234	174	234	46.5482
4	3	7.53177	2.78684	3	231	81	101	101	93.4682
4	3	6.36646	1.49593	1	222	132	192	222	48.3665
4	3	26.3141	2.46335	2	276	166	196	166	139.686
4	4	12.646	3.26884	1	165	145	75	165	152.354
4	4	1.54816	3.20868	1	180	150	220	180	178.452
4	4	2.8637	2.19017	3	82	152	202	202	24.8637
4	4	1.53665	2.49529	3	173	133	153	153	154.537
4	4	2.76517	2.00274	3	245	335	185	185	7.76517
4	4	5.65382	4.02793	3	134	254	104	104	109.654
4	4	7.90651	2.12616	3	118	138	198	198	25.9065
4	4	10.3045	2.37016	1	166	146	316	166	155.695
4	4	15.56	2.19076	2	80	190	140	190	25.56
4	4	5.09028	2.65219	2	166	176	86	176	170.91
4	4	11.1786	1.23827	3	193	323	253	253	61.8214
4	4	15.359	1.99677	1	176	156	296	176	160.641
4	4	4.2643	2.40196	3	86	96	186	186	1.7357
4	4	11.7131	1.67545	2	249	269	179	269	100.713
4	4	0.125016	1.61461	1	232	92	222	232	52.125
4	4	9.77783	2.10022	2	165	205	275	205	34.7778
4	4	11.7256	2.92754	2	189	279	249	279	110.726
4	4	5.27772	1.21562	1	110	160	60	110	115.278
4	4	15.4007	1.92546	2	154	114	4	114	129.401
4	4	19.9092	2.16139	3	87	57	117	117	136.909
4	4	0.315316	1.77371	2	107	227	67	227	46.6847
4	4	20.3893	3.04228	1	150	240	110	150	129.611
4	4	1.93567	2.67776	1	179	109	199	179	177.064
4	4	0.565051	2.81572	3	181	141	161	161	161.565
4	4	29.8699	2.10946	2	107	97	147	97	126.87
4	4	58.6442	1.85311	1	244	174	104	244	5.35583
4	4	26.1467	3.03159	2	106	146	186	146	172.147
4	4	24.4744	3.76965	3	308	268	318	318	162.474
4	4	9.08562	2.16615	1	140	230	210	140	130.914
4	4	19.8664	1.72303	2	56	96	206	96	115.866
4	5	74.0548	1.909	3	257	197	237	237	131.055
4	5	39.7839	3.82058	3	233	123	203	203	62.7839
4	5	5.29061	1.6506	1	138	38	118	138	132.709
4	5	4.00509	1.46128	1	228	278	138	228	43.9949
4	5	4.82141	2.50768	3	247	127	237	237	61.8214
4	5	11.7683	1.57948	2	175	315	265	315	146.768
4	5	25.1785	2.79636	2	138	188	28	188	33.1785
4	5	14	1.09753	3	226	136	256	256	90
4	5	27.4349	1.77687	1	306	326	236	306	153.435
4	5	6.8845	1.62631	3	182	232	302	302	128.884
4	5	8.07536	2.18828	3	263	213	243	243	71.0754
4	5	23.5308	1.79381	3	205	185	255	255	98.5308
4	5	17.4956	1.40708	1	259	159	209	259	61.5044
4	5	9.36246	1.24842	1	296	156	306	296	125.362
4	5	5.09476	1.20309	2	132	232	172	232	57.0948
4	5	16.0274	1.56459	2	230	110	90	110	126.027
4	5	82.5377	2.75359	2	257	137	217	137	54.4623
4	5	27.8991	1.64208	1	158	208	248	158	130.101
4	5	39	1.32028	3	161	201	51	51	90
4	5	12.9816	1.22816	1	163	143	223	163	150.018
4	5	14.6199	1.5741	1	188	158	98	188	22.6199
4	5	7.17146	1.66696	2	230	220	140	220	32.8285
4	5	12.0725	2.10585	3	154	204	164	164	151.928
4	5	12.8973	1.63308	2	85	105	215	105	117.897
4	5	12.4222	1.42353	1	42	12	122	42	29.5778
4	5	7.42077	1.43361	1	83	43	33	83	75.5792
4	5	15.8906	2.05576	2	163	173	133	173	157.109
4	5	6.34019	2.35415	2	60	180	50	180	173.66
4	5	10.7636	1.72263	3	199	289	309	309	139.764
4	5	22.5289	1.19854	2	134	104	194	104	126.529
4	6	7.34988	1.95477	3	35	175	115	115	107.65
4	6	14.6013	1.53938	2	74	64	144	64	49.3987
4	6	6.60707	1.27186	3	200	220	210	210	36.6071
4	6	4.34988	1.29082	1	202	132	212	202	17.6501
4	6	10.9065	1.65823	3	205	125	165	165	154.093
4	6	5.19859	1.22486	1	153	143	73	153	158.199
4	6	13.815	1.05088	1	225	95	165	225	31.185
4	6	18.5388	1.78128	2	81	101	141	101	119.539
4	6	23.9279	1.4701	1	96	116	76	96	72.0721
4	6	6.93142	1.80928	3	247	257	217	217	30.0686
4	6	12.2996	1.36273	2	245	255	295	255	62.7004
4	6	14.8285	1.4237	1	252	232	262	252	57.1715
4	6	12.5241	2.08181	2	212	222	132	222	29.4759
4	6	23.8056	2.07281	1	164	114	94	164	140.194
4	6	4.19859	3.15569	3	319	179	199	199	23.1986
4	6	28.3086	2.10028	3	302	182	212	212	3.69139
4	6	5.35402	2.86373	3	112	172	192	192	17.354
4	6	5.42957	1.63034	2	74	64	104	64	58.5704
4	6	24	1.69648	2	141	111	121	111	135
4	6	2.35402	2.12361	1	150	180	100	150	152.354
4	6	30.1944	1.89563	2	140	110	100	110	140.194
4	6	8.52411	2.00306	1	173	43	123	173	164.476
4	6	6.9454	1.7562	1	81	151	131	81	74.0546
4	6	22.7098	1.86917	2	99	119	219	119	141.71
4	6	0.537678	2.74388	3	205	275	215	215	35.5377
4	6	20.4633	1.92425	1	265	235	275	265	64.5367
4	6	7.34778	1.93964	3	114	164	214	214	41.3478
4	6	28.9546	1.40016	2	224	194	174	194	42.9546
4	6	1.34019	2.14562	3	165	195	185	185	6.34019
4	6	3.03624	2.1421	2	64	214	104	214	30.9638
5	1	2.8989	1.62301	3	237	257	297	297	119.899
5	1	5.31121	2.48397	3	160	290	300	300	125.311
5	1	1.29957	1.57911	2	309	289	339	289	107.7
5	1	34.4047	2.40429	1	236	176	216	236	21.5953
5	1	22.4831	1.18969	2	209	299	189	299	141.483
5	1	4.06047	2.03515	3	274	194	284	284	108.06
5	1	12.3758	1.5694	1	137	117	267	137	124.624
5	1	15.7449	1.63831	1	194	64	54	194	29.7449
5	1	13.6538	1.66844	2	204	174	154	174	160.346
5	1	17.2847	1.41541	3	174	254	114	114	131.285
5	1	14.0721	1.3651	1	212	192	182	212	17.9279
5	1	19.6901	1.05805	3	114	184	284	284	123.69
5	1	3.32565	1.04078	3	275	155	265	265	81.6743
5	1	14.556	1.21502	2	226	96	86	96	110.556
5	1	8.43495	1.86868	3	75	45	55	55	63.4349
5	1	72.796	2.13567	1	227	177	157	227	154.204
5	1	37.4203	1.83609	2	109	189	209	189	46.4203
5	1	27.7204	1.78997	1	176	96	136	176	23.7204
5	1	4.33404	1.90719	3	299	149	199	199	23.334
5	1	9.46414	1.73068	2	307	157	177	157	166.464
5	1	12.2894	2.69082	2	97	117	137	117	129.289
5	1	35.556	1.33003	1	240	170	180	240	24.444
5	1	41.4608	2.33822	2	182	232	162	232	10.5392
5	1	4.12502	1.89843	2	193	183	253	183	7.12502
5	1	6	2.38171	3	171	101	141	141	135
5	1	20.8208	2.50275	3	199	169	119	119	139.821
5	1	39.9097	2.44196	2	166	176	226	176	35.9097
5	1	45.0546	1.57638	1	299	179	159	299	164.055
5	1	17.5651	1.4654	1	144	184	204	144	161.565
5	1	25.9872	1.68817	1	196	226	276	196	41.9872
5	2	16.4794	1.55407	3	151	101	51	51	67.4794
5	2	54.1932	1.77074	1	105	185	175	105	159.193
5	2	9.74949	4.83951	1	346	306	216	346	156.251
5	2	3.29857	1.79337	1	170	80	160	170	166.701
5	2	3.8699	1.93475	2	133	33	53	33	36.8699
5	2	42.3893	1.79064	1	188	228	98	188	50.3893
5	2	1.55707	1.21996	1	255	235	195	255	73.4429
5	2	0.0362435	2.50569	3	126	76	166	166	165.964
5	2	13.7086	2.55325	3	42	102	2	2	15.7086
5	2	8.80141	1.32167	3	93	173	103	103	111.801
5	2	9.01311	1.48554	1	139	79	199	139	129.987
5	2	17.9042	1.07687	3	157	217	127	127	144.904
5	2	23.273	1.05593	1	67	157	137	67	43.727
5	2	9.37644	1.80219	3	176	236	326	326	155.376
5	2	13.0892	2.38771	2	219	209	299	209	42.0892
5	2	1.3925	1.26529	2	267	147	277	147	148.392
5	2	17.6013	1.12808	2	207	247	187	247	49.3987
5	2	12.2101	1.40019	3	91	191	121	121	133.21
5	2	20.6593	1.80176	3	174	194	234	234	33.3407
5	2	0.75948	1.53956	3	216	56	166	166	166.759
5	2	13.7585	1.40359	2	76	166	106	166	152.241
5	2	2.04094	1.26063	2	89	99	69	99	101.041
5	2	4.10223	1.05946	3	20	130	110	110	114.102
5	2	29.6901	2.59406	2	84	184	94	184	33.6901
5	2	9.12401	1.05517	1	96	76	26	96	105.124
5	2	7.09523	1.44164	1	13	73	53	13	20.0952
5	2	4.5722	1.88816	2	61	91	131	91	95.5722
5	2	10.9638	1.27504	2	295	245	215	245	75.9638
5	2	10.1342	1.37398	1	65	175	105	65	54.8658
5	2	5.56505	2.48263	2	266	246	206	246	71.5651
5	3	9.875	1.64966	2	223	183	133	183	12.875
5	3	43.8699	1.95571	3	258	248	218	218	81.8699
5	3	38.5651	1.75653	1	57	177	117	57	18.4349
5	3	31.6698	1.52503	3	184	194	114	114	145.67
5	3	6.93919	1.49703	2	119	219	159	219	45.9392
5	3	13.7839	0.916908	3	169	99	49	49	62.7839
5	3	0.957549	1.12807	1	141	201	91	141	140.042
5	3	0.90938	1.09648	2	215	315	225	315	135.909
5	3	4.24883	1.42002	3	140	270	250	250	74.2488
5	3	14.7824	1.50569	2	150	220	50	220	54.7824
5	3	0.725559	1.14532	2	60	70	40	70	69.2744
5	3	0.309932	1.35775	2	136	56	166	56	56.3099
5	3	14.2869	1.0543	1	200	90	160	200	34.2869
5	3	4.94359	1.33668	3	261	121	151	151	146.056
5	3	5.52881	1.2408	1	173	203	153	173	167.471
5	3	0.560438	1.39108	1	167	127	197	167	167.56
5	3	10.8202	1.18045	3	161	141	121	121	131.82
5	3	5.38931	1.7094	3	205	185	45	45	39.6107
5	3	6.99082	1.22092	3	230	300	260	260	73.0092
5	3	2.82865	2.09113	1	169	159	129	169	166.171
5	3	18.3141	1.01806	1	112	172	102	112	130.314
5	3	7.32683	1.36762	1	61	121	11	61	53.6732
5	3	25.9191	1.62061	2	118	198	38	198	43.9191
5	3	2.43495	1.30238	2	231	151	191	151	153.435
5	3	2.84217e-14	2.53761	2	260	180	250	180	0
5	3	36.8533	1.22126	3	144	194	74	74	37.1467
5	3	14.5819	1.67953	1	217	237	127	217	51.5819
5	3	14.3322	1.13853	2	46	126	136	126	140.332
5	3	11.556	1.47547	1	144	134	214	144	155.556
5	3	30.9807	1.35739	3	275	175	295	295	145.981
5	4	1.65382	1.08496	2	178	288	278	288	109.654
5	4	25.7398	1.62105	1	183	153	23	183	28.7398
5	4	12.541	1.58451	1	9	129	179	9	21.541
5	4	0.780753	1.88001	3	125	155	165	165	164.219
5	4	14.9869	1.25469	1	245	225	205	245	50.0131
5	4	37.6847	1.08136	1	279	249	199	279	136.685
5	4	17.3086	1.05662	2	146	66	136	66	48.6914
5	4	5.9454	1.61515	3	230	210	260	260	74.0546
5	4	12.8056	0.877438	1	297	327	217	297	129.806
5	4	17.3814	1.23207	3	32	12	132	132	149.381
5	4	7.30076	1.19381	3	74	64	24	24	16.6992
5	4	10.5169	1.38332	3	213	223	163	163	173.517
5	4	6.53077	1.4887	2	232	182	292	182	8.53077
5	4	2.59012	1.71112	3	33	123	23	23	20.4099
5	4	6.69515	1.59898	2	177	197	227	197	10.3048
5	4	7.46538	1.69664	1	161	231	191	161	168.465
5	4	25.1844	0.876922	2	163	73	43	73	47.8156
5	4	2.19859	1.41488	2	259	159	199	159	156.801
5	4	5.1301	1.17279	3	88	68	138	138	143.13
5	4	2.69007	1.55333	3	251	141	121	121	123.69
5	4	1.09085	1.87349	2	242	132	232	132	133.091
5	4	3.68038	1.16504	2	291	261	201	261	77.3196
5	4	4	2.37009	2	79	139	109	139	135
5	4	15.6335	1.14278	3	286	246	206	206	41.6335
5	4	7.56505	1.31487	3	121	151	71	71	63.4349
5	4	57.2564	1.51483	1	252	192	152	252	14.7436
5	4	36.222	1.98611	1	125	215	195	125	161.222
5	4	28.4072	1.67166	1	44	34	164	44	15.5928
5	4	17.5946	1.57906	1	125	45	115	125	142.595
5	4	6.63411	1.39579	2	145	165	85	165	171.634
5	5	2.57043	1.46572	1	124	114	74	124	121.43
5	5	45.1301	1.92456	2	222	262	172	262	36.8699
5	5	1.19406	1.54436	2	195	205	135	205	23.8059
5	5	8.74488	1.39675	2	211	111	141	111	119.745
5	5	29.1944	1.69778	3	31	91	21	21	50.1944
5	5	13.9831	1.26918	2	76	96	136	96	109.983
5	5	6.69924	1.23201	3	250	140	100	100	106.699
5	5	4.28688	2.76643	1	165	95	135	165	169.287
5	5	3.09259	1.03551	3	206	56	196	196	12.9074
5	5	17.9638	1.66549	2	277	257	267	257	59.0362
5	5	19.1027	0.840255	2	253	223	243	223	62.1027
5	5	16.5238	0.974645	3	154	314	234	234	37.4762
5	5	16.876	1.40876	1	212	172	322	212	15.124
5	5	6.82865	1.53441	1	173	163	213	173	166.171
5	5	6.53768	1.3414	1	151	231	301	151	144.462
5	5	14.4349	1.27424	3	179	199	139	139	153.435
5	5	3.42077	1.63674	2	131	191	141	191	14.4208
5	5	39.7295	1.06687	1	92	162	42	92	131.73
5	5	1.04422	1.46607	3	268	288	338	338	159.044
5	5	0.154068	1.51258	1	165	245	235	165	164.846
5	5	10.8014	1.27216	1	259	249	219	259	68.1986
5	5	14.0679	2.97078	3	212	162	82	82	67.9321
5	5	4.46554	1.82374	2	171	341	241	341	165.466
5	5	20.5318	1.36983	1	111	71	201	111	131.532
5	5	0.0685828	2.32651	3	195	125	165	165	165.069
5	5	10.3659	1.06262	3	117	207	227	227	36.6341
5	5	3.61046	1.34884	3	220	320	290	290	106.39
5	5	45.5924	1.10541	2	187	197	67	197	62.5924
5	5	42.7004	1.41689	1	70	90	40	70	27.2996
5	5	15.2277	1.79864	2	161	171	281	171	155.772
5	6	1.89727	1.10545	2	91	161	61	161	162.897
5	6	1.09476	0.921276	3	226	116	236	236	57.0948
5	6	14.0033	0.972134	1	102	82	62	102	116.003
5	6	17.2737	1.31404	2	265	295	275	295	132.274
5	6	29.8014	1.54898	2	177	307	277	307	156.801
5	6	1.23483	1.58618	3	224	164	144	144	142.765
5	6	7.02898	1.07876	1	37	97	57	37	44.029
5	6	28.7106	1.21015	2	162	112	132	112	140.711
5	6	24.9228	1.2235	3	201	271	211	211	55.9228
5	6	17.7462	1.51324	3	226	276	216	216	53.7462
5	6	5.27242	1.16912	3	105	155	195	195	9.72758
5	6	1.61565	1.36587	3	252	312	322	322	143.616
5	6	13.2532	1.17066	2	139	219	179	219	52.2532
5	6	26.5741	0.911681	1	84	204	134	84	57.4259
5	6	23.6071	1.14322	1	77	47	167	77	53.3929
5	6	16.7106	0.988249	3	154	204	214	214	50.7106
5	6	16.8845	2.49683	2	158	248	78	248	51.1155
5	6	28.9315	1.41225	2	251	181	281	181	29.9315
5	6	84.1737	1.2581	2	115	45	95	45	129.174
5	6	4.34618	1.28089	1	111	141	91	111	115.346
5	6	20.8377	1.21698	1	105	115	185	105	125.838
5	6	3.8787	1.34287	1	166	126	196	166	162.121
5	6	1	1.82642	1	179	309	209	179	0
5	6	16.821	1.49258	3	306	156	216	216	19.179
5	6	58.4349	1.67931	1	320	340	180	320	18.4349
5	6	2.87599	1.01028	3	248	158	288	288	105.124
5	6	1.93953	1.75294	3	210	170	160	160	161.94
5	6	20.0274	1.48083	2	164	74	204	74	53.9726
5	6	1.11391	1.64007	2	125	155	175	155	153.886
5	6	68.2724	1.46232	1	33	133	43	33	144.728
6	1	23.9638	4.56353	2	297	187	207	187	30.9638
6	1	8.2602	2.03552	3	183	203	233	233	61.2602
6	1	77.1301	1.82533	2	114	204	144	204	126.87
6	1	10.4349	2.70775	2	103	143	213	143	153.435
6	1	58.5014	2.61927	3	227	137	127	127	68.4986
6	1	11	2.17683	1	214	134	244	214	45
6	1	52.8202	3.0818	1	191	141	241	191	138.18
6	1	27.0375	2.80108	2	179	309	159	309	156.038
6	1	3.2026	1.77044	1	224	174	334	224	47.2026
6	1	4.29061	2.15106	2	173	313	253	313	137.291
6	1	8.96249	2.36778	3	135	145	165	165	156.038
6	1	2.71059	2.4286	3	28	158	138	138	140.711
6	1	24.4956	1.51068	3	216	96	176	176	151.504
6	1	8.74488	2.36605	3	279	319	339	339	150.255
6	1	14	1.29882	2	159	149	209	149	135
6	1	9.02737	2.85419	1	117	207	87	117	126.027
6	1	8.30993	1.8329	2	92	132	222	132	123.69
6	1	9.1155	1.37485	1	138	28	168	138	128.884
6	1	15.156	2.84803	3	55	85	115	115	130.156
6	1	12.8658	2.22667	2	283	183	173	183	170.134
6	1	1	2.15655	1	271	241	191	271	90
6	1	7.69924	5.26573	1	234	244	284	234	61.6992
6	1	8.30993	3.23193	1	42	162	142	42	33.6901
6	1	10.029	2.03392	1	146	136	256	146	135.971
6	1	1.98106	2.29598	3	125	155	175	175	173.019
6	1	10.5377	1.45921	2	245	115	195	115	125.538
6	1	15.5377	2.21818	3	180	170	160	160	144.462
6	1	2.46232	3.4799	3	177	297	187	187	9.46232
6	1	16.1986	1.55873	1	218	128	148	218	21.8014
6	1	87.4688	3.60748	2	49	139	59	139	46.4688
6	2	85.7723	3.79483	2	165	245	255	245	159.228
6	2	10.3048	1.62384	1	90	140	210	90	79.6952
6	2	1.63354	3.40159	3	225	245	175	175	176.634
6	2	4.74356	1.6912	2	260	280	140	280	104.744
6	2	7.90614	1.8946	1	178	188	168	178	5.90614
6	2	4.85601	4.30572	2	189	269	299	269	84.144
6	2	4.7603	3.1534	2	67	217	197	217	41.7603
6	2	0.974934	1.4341	3	214	234	134	134	133.025
6	2	22.6598	2.20846	1	254	214	224	254	51.3402
6	2	15.2189	1.56563	1	329	189	259	329	133.781
6	2	8.98164	2.22642	1	159	189	249	159	150.018
6	2	7.19406	1.90051	1	301	331	221	301	113.806
6	2	9.2397	1.53153	1	141	251	181	141	131.76
6	2	41.6598	2.54771	2	133	183	163	183	141.34
6	2	2.8699	3.73602	3	174	314	304	304	126.87
6	2	11.2996	2.75264	3	236	216	196	196	27.2996
6	2	1.36454	13.0085	3	106	156	186	186	4.63546
6	2	22.7468	1.60952	1	255	145	155	255	52.2532
6	2	0.0424511	3.6674	3	55	115	175	175	174.958
6	2	2	2.43855	3	263	233	223	223	45
6	2	0.29061	2.90844	1	47	127	167	47	47.2906
6	2	12.7811	1.7884	2	79	59	139	59	46.2189
6	2	7.61046	1.84154	3	309	329	339	339	151.39
6	2	9.37062	3.10372	2	157	147	87	147	156.371
6	2	2.56505	3.79134	2	244	204	184	204	26.5651
6	2	15.3474	2.2728	2	77	107	117	107	122.347
6	2	17.0888	2.83587	1	336	246	236	336	173.089
6	2	17.0035	2.52986	2	306	186	266	186	168.996
6	2	13.5085	3.07395	3	94	184	204	204	10.4915
6	2	5.78241	5.46888	3	244	324	184	184	9.78241
6	3	23.9052	2.61555	2	231	261	171	261	57.0948
6	3	5.7843	1.90126	1	130	150	90	130	124.216
6	3	6	4.00861	3	259	169	219	219	45
6	3	36.3086	3.09399	1	220	180	250	220	3.69139
6	3	6.91908	2.42498	2	177	127	167	127	133.919
6	3	5.37301	3.3471	3	89	189	199	199	13.627
6	3	14.6105	2.07935	1	104	34	94	104	118.61
6	3	20.7974	2.5261	2	198	158	248	158	137.203
6	3	10.5651	2.88987	3	154	224	74	74	63.4349
6	3	8.53878	2.68884	1	291	221	201	291	119.539
6	3	14.3764	2.64824	1	84	64	204	84	69.6236
6	3	2	2.3706	3	77	187	227	227	45
6	3	0.17859	1.70353	2	202	62	112	62	61.8214
6	3	7.2157	2.1028	3	137	177	117	117	124.216
6	3	1	1.8066	2	274	224	134	224	45
6	3	5	1.79229	2	120	220	150	220	45
6	3	15.3987	4.61317	2	149	169	109	169	4.39871
6	3	17.8699	2.81125	3	211	231	161	161	143.13
6	3	0	3.95259	1	180	300	320	180	0
6	3	11	2.20142	3	26	96	146	146	135
6	3	19.1811	4.21863	1	82	212	232	82	62.8189
6	3	7.52557	3.27249	2	140	170	180	170	162.474
6	3	2.84181	2.69929	2	221	231	121	231	53.8418
6	3	5.1301	3.55874	3	277	307	177	177	171.87
6	3	1.30076	2.08731	1	153	163	203	153	151.699
6	3	66	3.25436	1	111	221	101	111	45
6	3	4.36646	4.65669	2	191	91	51	91	86.6335
6	3	2.63251	9.97508	3	216	336	176	176	173.367
6	3	19.6901	3.08836	1	211	81	111	211	11.3099
6	3	5.0546	2.22289	3	194	134	204	204	29.0546
6	4	4.09028	2.29365	3	285	345	175	175	170.91
6	4	15.7585	1.74106	3	272	162	282	282	117.759
6	4	19	1.87937	3	204	274	334	334	135
6	4	3.21888	2.80888	3	138	248	178	178	1.21888
6	4	4.63363	2.89831	2	97	187	177	187	11.6336
6	4	10.2996	2.15771	2	222	152	162	152	162.3
6	4	5.25644	3.438	2	125	115	215	115	120.256
6	4	16.9065	13.5244	2	161	261	121	261	64.0935
6	4	11.3801	2.61561	3	261	151	281	281	112.38
6	4	5.25319	3.37362	3	107	27	47	47	52.2532
6	4	25.2397	1.80235	1	203	123	173	203	48.2397
6	4	9.1363	2.99583	2	44	34	24	34	24.8637
6	4	4.20112	1.38473	2	131	291	221	291	115.201
6	4	0.355825	3.63418	1	185	205	235	185	5.35583
6	4	6.67317	1.40016	1	317	217	187	317	143.673
6	4	22.0546	3.22574	2	208	218	188	218	15.9454
6	4	2.02737	2.0278	2	234	304	264	304	126.027
6	4	11.1811	2.34167	1	74	144	194	74	62.8189
6	4	31.5739	2.76993	3	148	88	198	198	49.5739
6	4	0.0282637	1.71877	3	39	109	139	139	139.028
6	4	3.30993	2.05066	2	122	82	142	82	78.6901
6	4	6.92625	2.30911	1	267	137	237	267	80.0738
6	4	5.52557	2.86873	1	78	118	218	78	72.4744
6	4	16.821	2.39955	1	81	181	171	81	64.179
6	4	4.27772	2.68106	1	249	199	219	249	64.7223
6	4	7.0546	2.53596	2	153	23	93	23	15.9454
6	4	0.468801	5.68016	3	209	239	269	269	88.5312
6	4	0.0908476	4.38277	3	128	218	178	178	178.091
6	4	1.95755	2.46413	1	187	267	167	187	5.04245
6	4	2	2.27093	1	227	217	257	227	45
6	5	2.42077	1.61801	2	132	102	232	102	104.421
6	5	7.63354	2.77618	3	234	204	214	214	41.6335
6	5	12.5206	2.24896	1	80	70	170	80	67.4794
6	5	83.607	5.97965	2	92	202	132	202	118.393
6	5	1.60707	2.90814	3	285	305	215	215	36.6071
6	5	29.9704	4.62841	3	221	271	191	191	161.03
6	5	8.97493	3.06978	1	187	57	77	187	178.025
6	5	22.359	2.16067	2	242	222	192	222	64.359
6	5	14.4926	2.92113	2	29	119	169	119	133.493
6	5	2.77568	7.34108	3	195	135	215	215	37.7757
6	5	0.878904	4.68106	2	57	177	77	177	177.879
6	5	2.81529	2.08842	2	250	230	130	230	52.8153
6	5	3.31791	2.7433	3	152	92	162	162	158.682
6	5	12.8428	2.96353	3	61	131	141	141	128.157
6	5	0.289407	4.14466	3	194	224	264	264	84.2894
6	5	23.4986	2.59675	3	125	165	135	135	111.501
6	5	1.90651	2.68974	1	294	184	334	294	115.907
6	5	0.169139	4.84103	3	99	109	179	179	178.831
6	5	55.4623	5.87929	1	226	246	236	226	170.538
6	5	6.63363	1.13853	1	140	90	160	140	146.634
6	5	11.4692	1.8386	1	290	230	260	290	98.5308
6	5	10.4976	1.73259	1	165	115	135	165	154.502
6	5	2.09028	1.96467	1	173	133	143	173	170.91
6	5	1.57043	3.04926	2	208	168	198	168	166.43
6	5	6.59242	3.39592	2	141	191	201	191	17.5924
6	5	10.4007	1.84902	2	131	151	141	151	140.599
6	5	4.50143	1.45942	2	217	197	247	197	21.5014
6	5	7.64255	1.76221	1	130	140	280	130	137.643
6	5	13.2364	3.26693	1	216	116	86	216	49.2364
6	5	0.987212	4.45782	3	289	209	229	229	48.0128
6	6	2.8699	2.82985	1	56	136	116	56	53.1301
6	6	40.0362	2.00025	3	206	156	296	296	75.9638
6	6	15.185	2.20888	2	74	164	224	164	148.815
6	6	0.47618	1.81846	1	233	193	213	233	52.5238
6	6	0.781125	7.45631	1	182	212	142	182	1.21888
6	6	10.992	3.50651	2	106	246	146	246	55.008
6	6	24.0939	3.75415	3	185	135	195	195	39.0939
6	6	9.56859	3.53846	2	102	62	202	62	52.4314
6	6	2.71085	3.74695	1	263	183	223	263	85.7108
6	6	0.510447	5.39109	3	223	303	183	183	2.48955
6	6	28.6107	3.62788	1	34	134	4	34	5.38931
6	6	3.38068	2.85402	1	151	101	241	151	147.619
6	6	5.00127	2.80043	2	167	227	187	227	52.0013
6	6	9.83356	2.35363	2	155	135	275	135	144.834
6	6	4.96376	2.31049	1	116	66	186	116	120.964
6	6	6.11934	2.78991	3	120	180	60	60	53.8807
6	6	6.27444	2.63515	1	297	247	287	297	110.726
6	6	0.385944	6.35332	3	322	152	182	182	2.38594
6	6	10.875	1.92958	3	237	257	207	207	37.875
6	6	5.2361	2.68181	3	201	131	141	141	135.764
6	6	0.289407	1.505	3	34	54	84	84	84.2894
6	6	0.645975	1.71263	2	98	108	28	108	107.354
6	6	0.59114	7.44835	1	179	199	119	179	178.409
6	6	22.7585	2.52246	3	185	195	265	265	62.2415
6	6	0	1.36622	2	110	90	70	90	90
6	6	0	8.37922	2	320	180	310	180	0
6	6	1.08562	5.09184	3	157	207	177	177	175.914
6	6	17.0362	2.62689	2	145	85	125	85	67.9638
6	6	5.09349	4.10074	2	229	239	329	239	64.0935
6	6	18.2744	2.9842	1	231	141	171	231	69.2744
7	1	69.9454	3.66535	2	276	126	186	126	15.9454
7	1	1.57923	3.64718	2	141	151	221	151	149.421
7	1	17.71	3.30587	1	98	58	168	98	115.71
7	1	35.6192	4.33714	2	133	273	153	273	57.3808
7	1	13.44	4.92941	3	116	256	186	186	19.44
7	1	10.2011	2.60945	1	210	260	250	210	19.7989
7	1	4.92754	3.31913	3	16	116	146	146	141.072
7	1	14.9638	5.26665	2	256	286	246	286	120.964
7	1	13.0935	3.48956	2	169	219	59	219	25.9065
7	1	12.8787	1.73645	1	265	235	305	265	72.1213
7	1	13.1663	2.55244	2	211	261	131	261	67.8337
7	1	14.1455	1.92928	3	210	100	260	260	65.8545
7	1	14.1735	2.72127	2	181	61	71	61	75.1735
7	1	2.39871	3.08486	1	2	62	52	2	4.39871
7	1	24.0926	3.88434	3	173	123	143	143	167.093
7	1	18.7436	5.29939	2	174	94	84	94	75.2564
7	1	26.4623	3.34253	1	163	203	233	163	9.46232
7	1	6.82099	3.58683	3	184	94	64	64	70.821
7	1	0.313852	2.79213	3	176	166	106	106	106.314
7	1	15.8215	2.72546	3	139	209	229	229	33.1785
7	1	40.0306	3.0731	2	197	107	207	107	147.031
7	1	1.29005	2.27592	1	207	317	187	207	25.71
7	1	38.1726	2.49502	1	70	50	150	70	31.8274
7	1	15.3808	4.7783	2	143	3	13	3	167.619
7	1	1.90741	2.95516	3	199	209	169	169	167.093
7	1	0.945396	2.03576	3	265	315	345	345	164.055
7	1	14.2184	2.37803	1	253	153	113	253	58.7816
7	1	11.8855	1.87513	3	246	236	316	316	124.114
7	1	50.3801	2.86205	1	73	213	53	73	22.6199
7	1	10.5922	2.6447	1	181	101	21	181	11.5922
7	2	14.2277	3.50527	3	195	175	35	35	20.7723
7	2	19.8699	3.15284	2	113	253	233	253	53.1301
7	2	1.11342	2.46525	2	260	210	330	210	28.8866
7	2	16.7398	2.31991	3	148	38	78	78	61.2602
7	2	22.1957	2.08393	3	210	100	190	190	32.1957
7	2	26.7004	4.55504	2	154	54	194	54	27.2996
7	2	40.1448	2.01121	1	240	200	220	240	19.8552
7	2	10.3099	5.74515	3	171	81	181	181	11.3099
7	2	4.83874	3.87737	2	291	161	201	161	156.161
7	2	33.4956	6.72817	3	165	185	85	85	118.496
7	2	11.6997	3.53608	2	229	199	239	199	30.6997
7	2	7.1155	2.54419	3	159	59	179	179	6.1155
7	2	6.69924	2.48468	3	250	110	100	100	106.699
7	2	0.724356	2.37154	3	183	163	123	123	122.276
7	2	12.7843	2.18438	1	178	148	158	178	10.7843
7	2	32.5819	2.01737	2	201	251	331	251	38.4181
7	2	3.17851	2.40728	2	50	30	180	30	33.1785
7	2	1.39871	2.76868	2	97	87	67	87	85.6013
7	2	10.0054	2.79751	1	157	97	237	157	167.005
7	2	4.38139	1.92265	2	290	280	210	280	104.381
7	2	2.64225	1.92659	1	238	318	248	238	60.6422
7	2	21.0459	2.37851	3	83	133	103	103	124.046
7	2	28.6821	5.36338	1	220	240	180	220	68.6821
7	2	1.55707	2.93612	2	165	195	265	195	16.5571
7	2	4.56914	2.57212	3	209	159	319	319	143.569
7	2	9.24135	1.96889	1	152	242	192	152	161.241
7	2	20.5514	1.72529	1	146	126	36	146	166.551
7	2	8.46232	3.53742	1	46	106	56	46	54.4623
7	2	13.0362	1.67323	1	136	206	146	136	149.036
7	2	12.6375	1.73234	1	132	172	162	132	144.638
7	3	5.46122	2.7168	2	85	35	115	35	29.5388
7	3	2.21518	2.69681	3	182	32	132	132	134.215
7	3	1.98164	2.22785	2	328	208	178	208	29.9816
7	3	10.5571	4.1651	3	244	254	264	264	73.4429
7	3	2.65256	2.39449	1	235	245	295	235	57.6526
7	3	4.00335	1.91215	3	172	182	112	112	116.003
7	3	5.80141	2.42338	2	256	286	216	286	111.801
7	3	10.0375	1.89762	3	104	154	214	214	23.9625
7	3	34.9967	1.91709	3	281	201	241	241	26.0033
7	3	15.0054	2.04062	3	153	63	73	73	57.9946
7	3	5.3925	2.51899	1	217	207	117	217	31.6075
7	3	17	1.81869	3	208	128	118	118	135
7	3	14	2.11242	1	239	139	109	239	45
7	3	19.1798	2.2162	2	169	119	109	119	138.18
7	3	11.0092	2.1739	1	152	72	42	152	163.009
7	3	25.7636	1.81054	1	30	90	130	30	4.23639
7	3	5.00918	1.67233	1	202	242	252	202	16.9908
7	3	30.2348	2.20358	2	173	83	113	83	52.7652
7	3	3.53768	2.04492	2	138	238	168	238	54.4623
7	3	0.619865	1.55957	1	202	112	232	202	22.6199
7	3	7.68937	1.96817	3	294	254	184	184	11.6894
7	3	1.59229	3.16487	3	273	243	213	213	34.5923
7	3	0.315316	2.10552	2	188	178	158	178	178.315
7	3	29.2856	2.06525	1	232	212	342	232	22.7144
7	3	17.5318	1.6479	2	194	294	244	294	131.532
7	3	9.15819	1.6425	1	207	307	257	207	36.1582
7	3	2.27421	1.87264	2	169	159	119	159	161.274
7	3	7.19859	2.20357	3	94	104	74	74	66.8014
7	3	7.33222	1.67692	2	24	174	144	174	1.33222
7	3	0.530766	2.17589	1	278	298	228	278	98.5308
7	4	57.646	3.2254	2	220	210	310	210	152.354
7	4	27.5014	1.91619	1	129	69	159	129	156.501
7	4	4.21103	1.80167	3	75	145	95	95	99.211
7	4	2.27049	4.46135	2	229	269	199	269	86.7295
7	4	3.26451	2.06012	3	176	216	236	236	59.2645
7	4	16.6901	2.17077	3	163	203	253	253	56.3099
7	4	3.08916	1.62346	2	229	129	139	129	132.089
7	4	10.0128	1.94535	1	142	42	72	142	131.987
7	4	10.9575	1.90153	3	99	39	119	119	129.958
7	4	3.02737	1.48939	1	303	183	213	303	126.027
7	4	11.5691	1.62436	2	202	312	192	312	143.569
7	4	22.5651	1.53809	3	196	156	266	266	63.4349
7	4	6.19443	2.97044	1	179	159	169	179	5.19443
7	4	8.35775	2.279	3	179	119	69	69	60.6422
7	4	16.5043	2.03411	3	85	75	165	165	148.496
7	4	17	1.52859	2	228	298	308	298	135
7	4	12.9638	1.90443	2	228	108	148	108	120.964
7	4	26.1193	2.208	1	100	270	250	100	126.119
7	4	11.5651	1.69003	1	165	105	45	165	153.435
7	4	2.27242	2.78473	2	238	258	168	258	80.2724
7	4	4.43495	2.85779	2	231	211	281	211	26.5651
7	4	1.63354	3.49269	3	280	210	140	140	138.366
7	4	0.70939	2.67994	1	183	123	113	183	2.29061
7	4	4.1363	2.26688	3	186	106	196	196	20.1363
7	4	8.61478	3.39357	3	162	202	212	212	23.3852
7	4	2.49232	2.39058	2	217	177	147	177	174.508
7	4	12.2564	2.04404	1	108	68	148	108	120.256
7	4	31.9584	1.42184	2	162	102	242	102	133.958
7	4	15.1455	1.44825	1	279	209	319	279	114.146
7	4	25.8309	1.81054	1	198	308	218	198	43.8309
7	5	14.9392	1.45407	2	239	149	219	149	134.061
7	5	18.444	1.42093	2	176	96	106	96	114.444
7	5	7.65382	2.27471	3	93	143	123	123	115.346
7	5	1.90477	1.99778	3	172	72	112	112	110.095
7	5	2.66269	2.31896	1	185	85	105	185	2.33731
7	5	26.4349	1.58702	1	233	323	253	233	26.5651
7	5	22.6598	4.20808	1	151	271	231	151	173.66
7	5	47.6507	1.7378	1	118	148	168	118	165.651
7	5	5.69545	2.68178	2	235	165	105	165	159.305
7	5	9.59218	2.36098	2	108	88	178	88	78.4078
7	5	0.0362435	2.43355	3	51	161	121	121	120.964
7	5	12.7106	1.67975	2	118	38	58	38	50.7106
7	5	2.36393	1.66294	3	139	29	179	179	1.36393
7	5	7.09582	1.62164	3	238	288	118	118	125.096
7	5	1.39718	3.08741	2	140	180	60	180	1.39718
7	5	7.18471	1.43104	1	240	280	300	240	52.8153
7	5	15.821	1.9604	1	145	165	135	145	160.821
7	5	6.69924	2.05721	1	170	120	190	170	163.301
7	5	11.9816	2.78391	3	142	232	72	72	60.0184
7	5	21.5713	1.80102	2	205	225	255	225	23.4287
7	5	20.3895	2.1466	1	131	171	81	131	151.39
7	5	6.2184	1.9029	3	235	315	245	245	58.7816
7	5	19.125	2.51413	2	178	148	98	148	167.125
7	5	7.63411	2.21773	3	186	106	196	196	8.36589
7	5	13.8015	1.95948	3	121	191	211	211	17.1985
7	5	1.47443	1.86408	2	69	199	139	199	17.5256
7	5	0.198591	2.44672	2	108	248	138	248	68.1986
7	5	7	1.45736	1	232	212	182	232	45
7	5	33.4744	1.46398	1	141	81	11	141	107.526
7	5	7.80427	1.85475	3	40	60	50	50	57.8043
7	6	1.80594	2.54694	3	208	288	338	338	156.194
7	6	1.25051	1.75121	2	205	335	215	335	156.251
7	6	4.8699	2.26378	3	138	48	148	148	143.13
7	6	14.9541	1.94235	1	131	201	211	131	145.954
7	6	5.19573	1.82666	2	253	243	143	243	57.8043
7	6	10.8014	2.02878	3	169	239	259	259	68.1986
7	6	16.4195	1.70293	3	219	179	149	149	132.58
7	6	4.88066	1.6181	1	131	91	101	131	126.119
7	6	0.635463	2.24783	3	206	116	176	176	175.365
7	6	3.4688	2.53829	2	218	178	328	178	1.4688
7	6	8.82854	2.23456	2	216	246	236	246	57.1715
7	6	0.293309	1.54438	2	106	126	146	126	125.707
7	6	0.339087	1.80473	1	303	263	273	303	122.661
7	6	4.68038	1.62253	1	98	168	238	98	102.68
7	6	0.710593	2.94448	2	60	220	110	220	39.2894
7	6	5.31121	1.69328	1	195	325	255	195	9.68879
7	6	21.211	3.10789	3	188	148	168	168	9.21103
7	6	7.69007	2.11529	3	189	159	199	199	11.3099
7	6	23.7693	1.79955	1	137	7	107	137	160.769
7	6	3.3925	2.47294	3	310	300	190	190	13.3925
7	6	15.0113	1.48376	3	102	122	142	142	157.011
7	6	0.565051	1.595	2	111	71	131	71	71.5651
7	6	14.1468	2.92073	3	317	167	327	327	161.147
7	6	6.74356	1.51602	1	217	197	337	217	30.2564
7	6	17.0042	1.55197	2	131	271	231	271	108.004
7	6	36.8025	1.20853	2	216	156	116	156	119.197
7	6	2.30076	1.63781	1	206	236	296	206	28.3008
7	6	1.8789	1.53216	1	131	231	201	131	132.879
7	6	4.9423	1.69996	1	249	129	169	249	64.0577
7	6	6.37913	2.58357	2	211	201	291	201	14.6209
8	1	3.11134	3.59775	1	165	285	195	165	168.111
8	1	8.03751	4.00234	3	167	117	77	77	68.9625
8	1	6.67686	1.81618	2	102	72	92	72	65.3231
8	1	1.99082	1.70272	2	245	345	275	345	163.009
8	1	1.13402	1.55731	1	123	113	93	123	121.866
8	1	10.0459	2.57407	2	106	156	176	156	145.954
8	1	8.43623	1.98672	2	216	236	226	236	47.5638
8	1	6.98311	3.71195	3	137	177	77	77	70.0169
8	1	6.2072	2.27937	3	233	273	213	213	39.2072
8	1	13.156	1.75447	3	253	293	333	333	139.844
8	1	10.6952	1.43478	1	246	196	206	246	55.3048
8	1	7.44293	3.01728	1	24	54	174	24	16.5571
8	1	11.8753	2.28675	1	157	117	97	157	145.125
8	1	7.51387	2.7261	3	72	102	162	162	154.486
8	1	10.8906	4.76996	1	168	298	188	168	157.109
8	1	2.36637	3.67065	3	101	111	31	31	33.3664
8	1	0.536655	3.84933	3	224	284	154	154	154.537
8	1	6.36637	2.29179	1	198	178	48	198	11.6336
8	1	17.7067	2.87921	2	228	288	178	288	125.707
8	1	8.6075	3.23416	3	93	123	203	203	31.6075
8	1	2.67317	2.76043	3	251	301	231	231	53.6732
8	1	35.1623	5.04087	2	291	341	181	341	125.838
8	1	30.7462	3.23097	1	22	172	152	22	171.254
8	1	9.99873	1.61678	2	132	242	112	242	52.0013
8	1	7.86598	1.40657	1	114	94	104	114	121.866
8	1	1.99091	2.76014	1	178	338	268	178	176.009
8	1	17.9164	4.77694	2	33	43	23	43	25.0836
8	1	2.35775	2.46586	2	92	162	172	162	164.358
8	1	13.0806	4.08036	2	327	267	297	267	100.081
8	1	0.565051	1.77529	3	44	154	64	64	63.4349
8	2	14.6593	2.03197	1	228	208	218	228	33.3407
8	2	9.44395	3.04208	1	195	265	175	195	24.444
8	2	23.8068	4.09657	1	60	190	220	60	36.1932
8	2	12.9638	2.51559	2	72	162	52	162	149.036
8	2	15.5792	3.57558	1	105	215	85	105	120.579
8	2	9.72556	2.40026	3	131	251	281	281	110.726
8	2	31.5348	2.04192	2	210	270	220	270	121.535
8	2	4.11391	2.08797	2	263	113	273	113	108.886
8	2	16.2902	2.77532	3	162	242	202	202	38.2902
8	2	5.38522	1.54421	1	252	162	282	252	66.6148
8	2	6.72511	2.08459	3	290	250	130	130	123.275
8	2	21.0395	6.49179	3	132	32	192	192	170.961
8	2	8.98852	2.69879	2	271	201	181	201	12.0115
8	2	18.866	3.14222	3	157	187	257	257	58.134
8	2	4.95755	2.85845	2	105	145	155	145	140.042
8	2	7.77568	1.98505	2	150	120	230	120	127.776
8	2	27.7468	2.77817	2	60	100	160	100	127.747
8	2	1.97654	1.99516	2	222	212	272	212	33.9765
8	2	12.2856	3.4965	2	155	145	165	145	157.286
8	2	8.99462	2.37172	3	289	229	139	139	147.995
8	2	2.74356	2.27228	3	157	67	237	237	59.7436
8	2	21.3664	3.27524	3	132	72	192	192	33.3664
8	2	2.74949	2.35848	3	196	226	246	246	68.7495
8	2	19.185	1.71094	1	78	148	208	78	58.815
8	2	25.4296	2.43064	1	264	184	274	264	58.5704
8	2	0.00334584	2.3126	1	244	264	104	244	63.9967
8	2	2.36646	3.40014	1	134	114	84	134	131.634
8	2	14.5196	4.23355	2	150	190	110	190	24.5196
8	2	11.3803	2.33581	1	158	188	138	158	169.38
8	2	11.0395	5.10377	3	273	223	133	133	144.039
8	3	9.63363	7.439	2	68	88	38	88	78.3664
8	3	61.9269	4.60537	3	199	219	279	279	37.0731
8	3	11.875	2.47865	3	304	284	334	334	142.125
8	3	7.78415	1.72945	3	173	303	203	203	30.7841
8	3	5.76255	2.04971	1	146	256	156	146	151.763
8	3	9.12472	1.76413	2	188	78	168	78	68.8753
8	3	8.64101	2.1687	1	163	23	53	163	154.359
8	3	13.0409	1.9176	2	168	88	68	88	101.041
8	3	1.2073	3.92134	3	241	221	311	311	132.207
8	3	10.0309	3.37333	1	197	107	247	197	27.0309
8	3	20.5041	3.29018	2	27	107	97	107	127.504
8	3	10.6598	3.52901	2	192	152	242	152	141.34
8	3	13.875	2.12905	2	74	44	174	44	57.875
8	3	1.11686	1.64143	3	296	266	306	306	127.117
8	3	3.63251	2.59149	2	287	267	337	267	83.3675
8	3	0.950995	2.86089	1	208	88	128	208	28.951
8	3	9.67641	3.67527	3	154	184	244	244	54.3236
8	3	7.06919	4.95035	3	232	152	192	192	19.0692
8	3	4.27421	2.51453	1	203	143	193	203	18.7258
8	3	19.5725	3.77819	3	281	181	131	131	150.573
8	3	1.76883	2.59524	1	139	179	169	139	137.231
8	3	3.70995	2.20858	2	222	202	182	202	25.71
8	3	23.6105	2.29796	1	85	135	105	85	61.3895
8	3	14.3014	2.06121	1	169	39	109	169	154.699
8	3	19.3664	3.03596	2	314	284	224	284	123.366
8	3	9.80141	1.84987	3	92	32	102	102	111.801
8	3	11.1613	1.74037	1	145	275	245	145	156.161
8	3	10.8215	1.36092	3	331	221	271	271	101.821
8	3	14.1179	2.06552	1	130	100	20	130	144.118
8	3	0.353297	1.64813	2	207	317	197	317	137.353
8	4	4.97439	1.92358	2	261	201	151	201	25.9744
8	4	8.46122	3.18421	2	137	187	177	187	15.4612
8	4	4.09555	1.5347	3	163	73	113	113	117.096
8	4	10.5901	1.06136	3	79	229	239	239	69.5901
8	4	11.9061	2.47613	1	309	259	199	309	140.906
8	4	8.76079	2.8391	1	85	175	125	85	76.2392
8	4	2.2664	2.06925	1	190	270	220	190	7.7336
8	4	17.9421	2.87228	3	308	158	288	288	125.942
8	4	0.61606	2.55882	3	260	170	180	180	179.384
8	4	4.57422	2.65581	3	230	340	260	260	75.4258
8	4	5.97174	1.61832	3	285	225	145	145	139.028
8	4	5.67686	3.55195	3	216	266	206	206	20.3231
8	4	1.62699	1.65624	2	127	57	67	57	58.627
8	4	0.386461	2.85076	1	182	242	252	182	1.61354
8	4	27.0963	3.18116	1	133	183	123	133	160.096
8	4	30.8882	2.15835	2	166	286	246	286	136.888
8	4	11.0685	2.43912	2	184	94	194	94	105.068
8	4	12.5923	1.66905	2	58	128	68	128	115.408
8	4	1.07357	3.16011	1	195	205	215	195	16.0736
8	4	9.41706	2.82471	2	206	116	166	116	125.417
8	4	8.16644	3.69878	2	257	297	167	297	125.166
8	4	3.24536	2.72586	1	227	347	307	227	43.7546
8	4	8.09284	2.80167	3	189	259	299	299	127.093
8	4	15.926	2.41147	2	217	177	257	177	12.926
8	4	6.25594	1.72893	1	142	112	252	142	135.744
8	4	4.32869	2.41702	2	133	243	173	243	58.6713
8	4	8.70696	1.67076	1	275	185	125	275	103.707
8	4	2.34325	3.8257	1	118	88	138	118	120.343
8	4	23.8014	3.08363	3	138	188	268	268	111.801
8	4	3.14554	1.65071	3	256	196	246	246	69.1455
8	5	2.80146	2.79584	1	155	195	65	155	152.199
8	5	2.96974	2.81325	2	213	43	203	43	40.0303
8	5	20.5928	1.41877	2	55	95	155	95	74.4072
8	5	10.4993	1.69673	2	191	221	231	221	51.4993
8	5	2.43623	3.14837	3	110	40	130	130	132.436
8	5	12.8991	2.12846	2	157	127	217	127	139.899
8	5	27.2005	2.68868	1	300	160	190	300	147.2
8	5	3.43495	2.03145	1	165	305	145	165	161.565
8	5	12.9744	1.28177	3	333	253	283	283	115.974
8	5	6.69515	1.90524	3	213	173	163	163	169.695
8	5	6.03624	1.87261	2	152	172	222	172	165.964
8	5	6.88658	1.81146	1	202	262	282	202	28.8866
8	5	2.98721	3.30513	2	41	141	21	141	138.013
8	5	16.8831	2.66484	1	144	244	274	144	127.117
8	5	24.3972	1.52721	1	248	198	178	248	43.6028
8	5	8.48613	1.66361	2	166	236	186	236	64.4861
8	5	1.65675	1.55049	1	238	248	178	238	59.6568
8	5	45.9816	2.57087	2	229	209	329	209	74.9816
8	5	0	1.87917	3	280	160	270	270	90
8	5	28.0441	2.28652	2	173	113	73	113	141.044
8	5	22.6355	1.59767	3	33	83	153	153	130.365
8	5	0.231175	1.85895	3	123	53	133	133	132.769
8	5	10.8065	2.57758	2	93	153	73	153	142.193
8	5	0.38394	2.2426	1	179	209	149	179	179.384
8	5	12.4349	0.961773	3	161	71	51	51	63.4349
8	5	8.0806	2.0457	1	88	148	58	88	79.9194
8	5	12.8209	1.67237	3	163	123	53	53	65.8209
8	5	3.89374	1.61917	1	144	104	74	144	147.894
8	5	12.179	1.63739	3	183	163	263	263	70.821
8	5	19.8658	2.579	3	255	205	235	235	35.1342
8	6	24.9454	2.33107	1	189	279	249	189	164.055
8	6	1.98023	2.34716	2	175	65	165	65	63.0198
8	6	15.6045	2.13569	1	194	204	224	194	29.6045
8	6	1.14289	3.36787	1	170	210	60	170	168.857
8	6	11.6713	1.83684	3	173	153	43	43	31.3287
8	6	17.0506	2.11511	2	230	260	210	260	62.9494
8	6	7.44275	2.60687	3	75	145	165	165	157.557
8	6	14.049	1.56055	2	218	228	298	228	62.049
8	6	6.31063	2.10478	1	207	227	177	207	33.3106
8	6	27.2764	2.04851	1	121	171	191	121	148.276
8	6	1.19443	1.30277	2	299	229	219	229	50.1944
8	6	17.6467	1.85804	1	115	235	215	115	132.647
8	6	0.61046	1.29693	3	262	202	152	152	151.39
8	6	7.07249	1.78029	1	21	41	61	21	28.0725
8	6	0.207298	1.90558	3	208	128	228	228	47.7927
8	6	2.25316	1.70487	1	203	153	173	203	25.2532
8	6	3.20047	2.92022	1	171	141	231	171	167.8
8	6	2	2.06006	2	213	223	303	223	45
8	6	6.24611	4.49138	3	137	287	267	267	80.7539
8	6	9.27242	1.31831	2	136	116	16	116	125.272
8	6	8.9454	1.47419	1	97	207	217	97	105.945
8	6	5.96377	2.36138	2	72	62	102	62	67.9638
8	6	6.57131	1.85717	3	225	245	255	255	68.4287
8	6	3.59281	2.44785	3	218	68	78	78	74.4072
8	6	0.43363	2.55453	3	2	22	132	132	131.566
8	6	13.6795	2.7471	3	158	148	178	178	164.32
8	6	0.255119	2.58365	2	230	330	320	330	150.255
8	6	0.863697	1.98434	2	64	114	34	114	114.864
8	6	10.751	2.19339	2	315	225	235	225	55.751
8	6	18.6743	2.11059	3	278	268	198	198	36.6743
9	1	17.7357	2.81996	1	119	179	149	119	136.736
9	1	0.0685828	2.60104	3	215	285	195	195	14.9314
9	1	16.3625	2.05027	2	209	289	309	289	125.362
9	1	0.025066	2.66878	1	178	108	58	178	178.025
9	1	21.6522	3.15641	1	297	247	147	297	138.652
9	1	3.09476	3.82418	1	234	254	194	234	57.0948
9	1	9.55605	3.05802	2	109	169	199	169	159.444
9	1	3.8789	3.0247	1	186	146	86	186	2.1211
9	1	10.3895	1.97842	2	174	84	214	84	73.6105
9	1	4.40782	2.69981	3	174	94	74	74	78.4078
9	1	31.4349	2.3671	2	142	122	152	122	153.435
9	1	11.9761	3.40391	3	200	130	90	90	78.0239
9	1	3.29136	2.65339	1	19	99	79	19	15.7086
9	1	6.07961	0.51152	2	119	179	229	179	5.07961
9	1	8.35899	3.44194	3	181	171	281	281	109.359
9	1	3.76517	4.95245	2	114	184	74	184	7.76517
9	1	8.63251	0.824396	3	143	63	223	223	51.6325
9	1	2.50852	2.33499	3	313	223	193	193	10.4915
9	1	3.48955	2.21529	3	166	246	226	226	42.5104
9	1	14.4349	4.82527	1	184	64	124	184	18.4349
9	1	13.6598	2.83169	3	95	205	115	115	128.66
9	1	17.5288	1.92151	2	300	220	260	220	57.5288
9	1	33.125	0.709375	3	276	256	206	206	172.875
9	1	23.4711	5.54315	3	170	280	150	150	126.529
9	1	7.70043	2.90759	2	195	145	85	145	152.7
9	1	9	2.80294	1	54	224	114	54	45
9	1	12.4208	3.4248	1	178	298	258	178	165.579
9	1	10.4328	0.630642	2	165	325	275	325	155.433
9	1	14.8056	0.517713	2	145	245	205	245	50.1944
9	1	19.8189	1.46826	1	182	152	252	182	162.181
9	2	0.826342	0.679421	3	170	110	230	230	50.8263
9	2	6.30455	0.654032	1	18	188	158	18	24.3045
9	2	4.43748	1.67898	1	186	286	246	186	10.4375
9	2	9.24052	0.908623	1	184	164	144	184	13.2405
9	2	11.2648	0.677267	2	246	136	236	136	147.265
9	2	11.5289	2.06037	3	105	115	65	65	53.4711
9	2	23.9275	1.80292	1	128	148	178	128	151.928
9	2	4.11391	5.35736	3	187	207	157	157	161.114
9	2	10.2176	0.637022	3	250	210	200	200	9.78241
9	2	24.7512	3.61711	2	319	189	239	189	164.249
9	2	15.4195	0.630841	3	172	42	122	122	137.42
9	2	7.39871	1.09691	2	202	222	292	222	49.3987
9	2	20.0454	0.443923	2	43	153	163	153	132.955
9	2	22.573	2.67753	1	104	124	134	104	126.573
9	2	9.80557	2.4164	1	240	220	300	240	50.1944
9	2	4	2.59855	3	101	201	131	131	135
9	2	13.0608	2.38385	1	121	231	131	121	134.061
9	2	4.15969	1.75358	3	270	220	240	240	55.8403
9	2	25.5377	2.00935	2	310	260	340	260	54.4623
9	2	1.95459	1.95933	3	174	254	184	184	2.04541
9	2	2.5198	3.45566	2	224	274	174	274	96.5198
9	2	9.96914	2.99079	1	98	168	48	98	107.969
9	2	20.9946	6.8197	2	163	143	203	143	122.005
9	2	18.4711	2.44261	1	305	195	225	305	143.471
9	2	16.6901	1.47941	1	253	333	223	253	56.3099
9	2	12.0454	2.83018	2	145	125	155	125	137.045
9	2	13.7352	2.03954	2	249	199	219	199	32.7352
9	2	8.36246	0.661717	3	17	37	117	117	125.362
9	2	10.4711	1.92074	3	137	187	227	227	36.5289
9	2	6.88658	0.652549	2	242	112	192	112	118.887
9	3	20.7144	1.80152	2	132	182	172	182	22.7144
9	3	2.61986	1.36599	3	190	230	250	250	67.3801
9	3	4.70669	3.03214	3	129	49	149	149	144.293
9	3	15.6199	2.39411	1	187	167	257	187	22.6199
9	3	13.3852	2.41542	2	220	170	240	170	156.615
9	3	7.92754	1.50077	3	101	81	121	121	128.928
9	3	3.63251	2.78417	2	208	138	188	138	141.633
9	3	4.16126	1.49759	2	157	107	87	107	111.161
9	3	9.19859	2.54933	3	164	144	194	194	23.1986
9	3	16.641	1.926	1	36	166	76	36	19.359
9	3	10.0721	3.06237	2	268	298	188	298	107.928
9	3	5.30485	2.94032	1	175	265	245	175	169.695
9	3	1.52881	1.70522	3	184	224	124	124	122.471
9	3	9.86581	1.3438	2	105	45	25	45	35.1342
9	3	18.6335	1.42914	1	293	213	303	293	131.634
9	3	11.8265	1.35036	3	297	197	267	267	75.1735
9	3	16.0754	2.35037	2	165	215	125	215	18.9246
9	3	3.14968	0.599105	2	176	156	196	156	152.85
9	3	33.725	2.45443	1	41	91	1	41	7.275
9	3	13.2551	1.88882	2	258	268	148	268	74.7449
9	3	7.50143	0.663318	3	241	201	301	301	113.499
9	3	4.99202	0.515555	1	195	155	55	195	10.008
9	3	6.93567	1.77143	3	194	314	274	274	87.0643
9	3	9.0306	1.74468	3	178	238	138	138	147.031
9	3	10.3987	1.26006	1	219	99	209	219	49.3987
9	3	4.68879	1.19129	3	210	130	220	220	35.3112
9	3	15.6355	1.23666	1	169	109	209	169	4.63546
9	3	16.8056	1.74566	2	303	293	233	293	129.806
9	3	19.6107	1.47018	1	70	10	140	70	50.3893
9	3	19.2602	2.29706	1	177	277	187	177	16.2602
9	4	3.23562	1.90736	3	245	215	175	175	171.764
9	4	9.43495	1.48485	3	119	109	189	189	18.4349
9	4	26.3893	0.468747	1	114	194	154	114	140.389
9	4	8.36637	2.06642	2	130	110	80	110	101.634
9	4	13	0.525407	3	247	137	167	167	0
9	4	6.72556	0.537755	2	34	104	94	104	110.726
9	4	3.95296	1.57842	1	132	282	162	132	128.047
9	4	0.29061	2.11463	2	233	133	193	133	132.709
9	4	7.8845	2.42654	2	221	211	271	211	38.8845
9	4	4.00538	0.468161	2	208	118	108	118	122.005
9	4	9.02959	0.659201	1	208	198	338	208	18.9704
9	4	4.19859	2.54642	2	161	251	241	251	66.8014
9	4	7.62356	2.27112	3	248	188	208	208	20.3764
9	4	2.65067	1.9056	2	37	197	107	197	14.3493
9	4	39.8699	1.81031	1	228	178	198	228	8.1301
9	4	1.99584	2.8637	2	200	160	140	160	161.996
9	4	7.11391	1.62999	1	26	136	116	26	18.8861
9	4	5.9454	1.08755	3	50	180	80	80	74.0546
9	4	12.3112	2.95129	1	247	227	277	247	54.6888
9	4	4.84277	2.9114	3	293	283	223	223	38.1572
9	4	1.85601	1.93054	3	156	246	266	266	84.144
9	4	2.17551	1.67931	1	262	282	332	262	79.8245
9	4	9.9454	2.25811	1	264	104	184	264	74.0546
9	4	5.37301	2.55301	1	199	279	159	199	13.627
9	4	4.60256	2.92277	2	63	133	153	133	137.603
9	4	21.6026	1.76626	1	296	206	156	296	137.603
9	4	10.3003	3.66583	3	191	261	221	221	30.6997
9	4	15.6294	2.21636	3	172	312	262	262	66.3706
9	4	6.44395	2.11821	3	173	153	63	63	69.444
9	4	12.7449	2.73795	2	253	163	133	163	150.255
9	5	3.65981	2.44764	3	205	185	215	215	38.6598
9	5	3.46122	0.59243	1	303	253	183	303	119.539
9	5	1.96052	0.615073	2	309	169	279	169	170.961
9	5	3.19443	0.590723	1	178	158	248	178	174.806
9	5	10.4399	3.69707	2	172	202	212	202	11.5601
9	5	4.97263	2.56207	3	156	196	266	266	81.0274
9	5	2.43495	1.42466	1	74	104	34	74	71.5651
9	5	0.52382	3.009	2	192	52	202	52	52.5238
9	5	25.8753	3.59528	3	76	136	126	126	100.125
9	5	14.4429	1.60413	1	284	114	244	284	118.443
9	5	13.4692	1.42968	3	163	243	293	293	126.469
9	5	4.00538	1.9679	2	347	197	337	197	12.9946
9	5	17.2996	3.03628	1	260	230	150	260	62.7004
9	5	31.3808	0.570723	3	149	49	199	199	167.619
9	5	7.2602	1.78949	3	286	226	216	216	28.7398
9	5	5.46554	0.586538	3	210	190	160	160	165.466
9	5	1.77225	3.98563	3	31	41	71	71	69.2277
9	5	1.66091	1.8668	2	184	104	94	104	102.339
9	5	7.17901	1.69328	1	237	257	167	237	64.179
9	5	6.74616	2.10466	1	133	73	103	133	126.254
9	5	14.8014	3.57595	2	193	263	253	263	68.1986
9	5	24.9726	1.99299	2	271	331	231	331	126.027
9	5	8.70864	2.99853	3	137	17	97	97	105.709
9	5	28.3008	2.86412	1	90	160	110	90	118.301
9	5	5.58194	2.49843	2	146	136	206	136	141.582
9	5	40.0679	1.65387	1	117	167	257	117	157.068
9	5	11.359	1.33652	3	222	282	262	262	70.641
9	5	5.12502	1.56815	1	223	173	123	223	37.875
9	5	16.2011	2.99736	2	41	81	191	81	64.7989
9	5	7.19443	3.93429	2	148	178	188	178	5.19443
9	6	6.9454	1.06643	3	259	119	99	99	105.945
9	6	1.8789	2.37793	2	111	41	151	41	42.8789
9	6	0.801409	2.21041	2	199	249	289	249	68.1986
9	6	17.0128	2.0001	1	211	151	281	211	48.0128
9	6	6.34778	1.76142	3	225	265	215	215	41.3478
9	6	10.6901	2.67451	1	247	287	217	247	56.3099
9	6	6.71059	2.8292	2	61	91	141	91	84.2894
9	6	4.17551	2.15114	3	204	124	174	174	169.824
9	6	1	3.03178	1	181	91	121	181	0
9	6	4.25384	3.5536	2	293	283	203	283	98.7462
9	6	9.87528	2.29017	1	211	261	201	211	21.1247
9	6	8.69379	0.401211	1	211	81	121	211	22.3062
9	6	1.60282	0.312106	3	217	207	177	177	178.603
9	6	11.1986	3.21563	3	247	217	147	147	158.199
9	6	5.46232	2.24545	1	184	244	254	184	9.46232
9	6	18.5308	1.39161	3	195	175	215	215	53.5308
9	6	26.2906	0.589029	2	201	111	161	111	137.291
9	6	10.8699	2.85324	3	206	306	296	296	126.87
9	6	0.935673	1.91197	3	302	232	272	272	92.9357
9	6	9.54816	1.90359	1	172	182	222	172	1.54816
9	6	12.3048	1.60726	3	163	213	133	133	145.305
9	6	5.21759	2.8328	2	290	240	260	240	54.7824
9	6	9.88553	1.72258	2	201	181	151	181	10.8855
9	6	3.38034	2.22296	3	174	154	104	104	100.62
9	6	15.9048	1.65796	1	81	211	191	81	65.0952
9	6	3.40771	2.80693	1	232	322	212	232	55.4077
9	6	6.30576	2.07262	1	271	121	201	271	97.3058
9	6	5.61046	2.23565	2	323	293	253	293	118.61
9	6	0.184916	2.05797	2	74	184	104	184	4.18492
9	6	3.55281	2.14452	2	219	159	249	159	162.553
10	1	59	17.5453	1	104	224	234	104	45
10	1	8.23483	7.04111	1	299	269	239	299	127.235
10	1	34.7244	4.01449	3	258	218	338	338	12.7244
10	1	0.255328	4.08425	2	202	162	222	162	162.255
10	1	29.556	3.4031	2	166	126	106	126	155.556
10	1	6.98311	4.45265	1	212	112	152	212	25.0169
10	1	45.3402	5.30291	2	121	141	201	141	6.34019
10	1	6.02561	6.13841	1	193	153	263	193	19.0256
10	1	12.9726	4.64217	3	146	26	86	86	98.9726
10	1	3.1301	5.17633	3	130	200	230	230	53.1301
10	1	6.50143	6.12119	1	345	315	225	345	158.499
10	1	13.0169	5.62913	1	147	167	197	147	160.017
10	1	7.43495	2.50268	1	146	206	166	146	153.435
10	1	23.7743	5.11388	3	237	117	207	207	50.7743
10	1	14.641	3.84161	2	109	79	129	79	64.359
10	1	0	1.55158	1	270	140	290	270	90
10	1	7	6.65325	3	117	217	187	187	0
10	1	14.4349	2.7026	1	139	159	49	139	153.435
10	1	4.99091	3.95419	2	174	134	114	134	138.991
10	1	27.29	3.09837	2	122	172	202	172	19.29
10	1	20.1737	2.68604	3	161	151	251	251	50.8263
10	1	14	6.78896	2	219	59	159	59	45
10	1	1.42077	3.13	2	107	77	187	77	75.5792
10	1	23.9958	2.34623	3	182	252	312	312	108.004
10	1	5	2.4546	1	220	100	120	220	45
10	1	9.8787	1.86078	3	198	228	278	278	107.879
10	1	1.81889	2.37952	3	264	144	254	254	72.1811
10	1	2.23636	2.7168	2	142	232	212	232	49.7636
10	1	1.78112	1.72808	2	208	138	248	138	136.219
10	1	23.1342	3.66827	3	152	112	102	102	125.134
10	2	20.7098	3.50484	1	121	101	141	121	141.71
10	2	34	2.06448	1	259	199	209	259	45
10	2	7.96376	3.13518	3	162	212	112	112	104.036
10	2	9.90972	2.44691	2	254	334	294	334	144.09
10	2	0.763642	3.38534	2	209	229	139	229	49.7636
10	2	16.1755	5.18228	3	229	249	219	219	55.1755
10	2	2.37625	2.14329	3	167	177	77	77	74.6237
10	2	36.8699	4.71561	2	290	180	160	180	143.13
10	2	13.8151	2.07942	2	173	153	103	153	139.185
10	2	39.5044	2.60605	3	192	82	202	202	61.5044
10	2	0.746162	2.44752	2	138	98	88	98	98.7462
10	2	2.68468	4.05804	2	91	181	141	181	178.315
10	2	1.56505	2.18443	3	230	220	250	250	71.5651
10	2	7.69007	2.17737	1	64	234	154	64	56.3099
10	2	8.98689	2.0906	1	149	219	139	149	140.013
10	2	28.2894	2.77358	2	179	259	189	259	50.7106
10	2	7.1155	2.89397	2	91	1	141	1	173.884
10	2	7.68937	2.69718	3	149	159	139	139	146.689
10	2	2.02507	2.29285	1	184	264	254	184	1.97493
10	2	18.2996	2.68367	2	74	144	184	144	162.3
10	2	0.115504	3.37905	3	109	119	129	129	128.884
10	2	0	1.26351	3	110	190	270	270	90
10	2	56.4986	4.69818	3	188	118	168	168	111.501
10	2	19.9726	1.5694	2	176	146	76	146	126.027
10	2	18.9638	2.68655	3	227	87	237	237	75.9638
10	2	3.60707	1.74105	1	303	243	253	303	126.607
10	2	7.53077	2.48971	1	271	191	331	271	98.5308
10	2	12.008	2.2008	1	223	283	153	223	55.008
10	2	2.34019	2.25003	1	229	199	259	229	51.3402
10	2	2.03086	7.97282	1	160	230	270	160	162.031
10	3	2	0.968894	3	38	68	88	88	90
10	3	8.19859	2.68578	3	260	280	300	300	111.801
10	3	10.047	2.53326	3	252	262	332	332	141.953
10	3	7.07375	2.17298	1	287	297	177	287	99.9262
10	3	1.9245	3.21825	2	149	109	29	109	110.925
10	3	3.08092	2.19187	1	43	113	93	43	46.0809
10	3	10.3245	4.09307	3	167	147	87	87	76.6755
10	3	10.2317	2.65612	2	177	247	217	247	56.7683
10	3	19.7512	1.92273	1	49	69	209	49	29.2488
10	3	2.97439	2.43857	3	138	98	158	158	160.974
10	3	6.84277	2.80479	2	75	225	115	225	38.1572
10	3	4.98311	1.92604	2	85	105	155	105	109.983
10	3	11.5043	1.92223	1	110	220	150	110	121.504
10	3	53.5043	2.40606	2	172	202	142	202	148.496
10	3	9.50245	2.68757	1	190	220	200	190	19.5024
10	3	13.7106	2.1827	1	172	102	92	172	5.71059
10	3	67.0679	3.11144	1	225	145	85	225	157.932
10	3	38.4349	3.35919	2	205	65	195	65	26.5651
10	3	12.7468	1.63984	2	15	65	95	65	52.2532
10	3	17.6901	3.36576	3	24	124	164	164	146.31
10	3	1.9245	2.09869	1	161	171	271	161	159.075
10	3	19.6507	2.23818	3	209	279	169	169	149.349
10	3	4.88609	2.43639	2	144	194	214	194	18.8861
10	3	13.6732	1.99038	3	100	120	230	230	36.3268
10	3	9.10273	2.4676	3	132	242	82	82	72.8973
10	3	22.3499	2.77832	3	95	215	185	185	27.3499
10	3	3.76361	2.147	2	197	307	267	307	130.764
10	3	3.2602	1.89537	1	238	158	258	238	61.2602
10	3	5.40771	4.46673	2	90	130	230	130	124.592
10	3	4.23636	1.52948	1	144	114	124	144	139.764
10	4	1.53768	4.37911	2	246	236	226	236	54.4623
10	4	1.69007	1.82864	3	162	322	212	212	33.6901
10	4	6.15969	1.86801	1	62	182	122	62	55.8403
10	4	61.3693	4.30537	2	112	202	162	202	140.631
10	4	65.8551	4.84071	3	120	10	110	110	44.1449
10	4	9.13364	2.91078	3	55	25	145	145	154.134
10	4	12.359	1.89452	1	263	283	223	263	70.641
10	4	4.26373	2.16204	1	198	288	328	198	13.7363
10	4	1.74356	1.95807	1	212	232	142	212	30.2564
10	4	7.39871	3.49494	3	128	158	48	48	40.6013
10	4	11.125	6.17818	2	196	266	176	266	97.125
10	4	11.9987	2.36701	3	146	156	116	116	127.999
10	4	6	1.67959	1	141	11	101	141	135
10	4	14.1597	2.68248	1	200	230	180	200	34.1597
10	4	26.2415	4.18589	3	161	191	171	171	17.2415
10	4	0.134193	2.23497	1	170	230	240	170	170.134
10	4	3	3.90517	1	177	147	117	177	0
10	4	12.4403	2.84838	2	148	128	68	128	140.44
10	4	0.983107	2.48301	1	296	286	276	296	115.017
10	4	0.534455	1.59423	1	329	239	349	329	149.534
10	4	0.565051	2.79153	3	256	196	206	206	26.5651
10	4	0.690068	1.92467	2	117	147	127	147	146.31
10	4	4.23483	2.4925	3	302	222	192	192	7.76517
10	4	18.1336	1.94371	2	94	44	184	44	25.8664
10	4	41.971	1.53992	3	156	146	86	86	44.029
10	4	2.90915	4.06439	3	141	121	181	181	178.091
10	4	1.64598	2.41506	2	189	199	229	199	17.354
10	4	4.80251	1.8849	2	246	146	126	146	150.803
10	4	1.82141	1.63596	2	130	210	220	210	28.1786
10	4	15.1145	2.08213	2	119	109	149	109	124.114
10	5	12.5819	1.66257	1	51	111	141	51	38.4181
10	5	8.9454	2.86116	1	173	143	163	173	164.055
10	5	0.376435	1.7162	2	75	155	55	155	155.376
10	5	1.80141	2.72	2	180	250	90	250	68.1986
10	5	26.0772	1.88373	2	252	172	232	172	145.923
10	5	42.2101	5.84294	3	61	21	181	181	43.2101
10	5	3.90972	2.74512	3	77	107	167	167	170.91
10	5	8.13364	1.64522	1	124	74	64	124	115.866
10	5	11.4208	1.91965	2	107	267	247	267	75.5792
10	5	15.2737	2.04376	1	243	213	123	243	47.7263
10	5	11.6678	1.4617	3	172	122	212	212	43.6678
10	5	17.2189	1.9	2	171	61	181	61	43.7811
10	5	1.38435	1.86382	1	170	10	60	170	171.384
10	5	18.3048	2.91831	1	188	328	178	188	169.695
10	5	7.47114	2.08235	2	254	224	144	224	36.5289
10	5	14.0274	2.06562	3	287	187	337	337	171.027
10	5	53.4208	1.69607	2	194	84	64	84	30.5792
10	5	3.67686	1.74756	3	254	234	204	204	20.3231
10	5	13.3474	2.44789	2	141	161	291	161	147.653
10	5	32.5571	1.7063	1	196	156	56	196	163.443
10	5	1.66778	1.72181	1	318	168	308	318	136.332
10	5	12.9909	2.34976	2	254	234	204	234	41.0091
10	5	3.07208	1.52182	3	191	221	201	201	17.9279
10	5	8.43495	2.15	3	165	195	145	145	153.435
10	5	28.3402	2.8143	1	113	153	203	113	141.34
10	5	11.6952	1.80373	1	113	133	193	113	124.695
10	5	1.99462	2.92499	2	106	56	46	56	57.9946
10	5	3.01279	3.26512	3	35	95	45	45	48.0128
10	5	0.121096	4.32767	3	12	22	182	182	2.1211
10	5	3.75389	2.45579	3	82	22	32	32	35.7539
10	6	4.99082	1.79837	3	242	202	192	192	16.9908
10	6	12.2184	1.76788	1	289	159	299	289	121.218
10	6	20.1443	2.52467	2	191	131	161	131	151.144
10	6	2.97613	3.64847	3	241	221	171	171	168.024
10	6	16.5993	1.58295	2	164	124	144	124	140.599
10	6	12.7495	1.99562	1	214	194	204	214	21.2505
10	6	3.56505	2.08897	2	257	247	157	247	63.4349
10	6	15.3844	3.62456	1	291	181	161	291	126.384
10	6	11.4712	2.31424	3	174	264	114	114	102.529
10	6	19.3005	1.38586	1	223	333	263	223	62.3005
10	6	11.4275	2.41492	3	92	142	72	72	60.5725
10	6	37.751	7.19664	3	300	260	330	330	112.249
10	6	10.5367	2.05787	2	59	99	49	99	109.537
10	6	5.46554	1.77676	2	235	245	125	245	59.5345
10	6	13.9061	1.60177	2	103	53	153	53	39.0939
10	6	10.4956	2.39491	2	222	252	282	252	61.5044
10	6	5.32869	2.01625	1	26	116	56	26	31.3287
10	6	6.61924	2.36617	1	161	271	241	161	167.619
10	6	3	2.219	3	118	198	228	228	45
10	6	21.3106	2.14054	2	193	213	263	213	11.6894
10	6	7.23639	2.16061	1	132	92	202	132	139.236
10	6	0.362462	2.00935	1	55	95	85	55	54.6375
10	6	13.3474	2.62707	3	259	229	199	199	32.3474
10	6	24.4744	1.87682	1	222	202	182	222	17.5256
10	6	1.91438	1.82381	2	101	231	201	231	49.0856
10	6	19.2307	1.79384	2	185	225	345	225	25.7693
10	6	1	0.94308	3	189	229	269	269	90
10	6	15.1986	2.14014	1	37	47	97	37	21.8014
10	6	20.4762	1.93183	3	173	193	253	253	52.5238
10	6	21.1193	2.5325	3	60	120	30	30	8.88066
11	1	20.8908	3.02384	1	169	309	229	169	148.109
11	1	0.459024	5.12444	3	162	232	202	202	21.541
11	1	11.8263	1.76033	1	129	209	159	129	140.826
11	1	8.49573	2.673	2	190	320	250	320	148.496
11	1	21.7636	2.01998	3	222	182	62	62	40.2364
11	1	8.12467	2.70557	1	223	243	303	223	34.8753
11	1	2.25512	2.38528	3	238	258	148	148	150.255
11	1	27.9097	2.37821	2	138	98	108	98	125.91
11	1	9.10223	2.39542	2	185	165	95	165	155.898
11	1	9.18593	1.6326	3	82	112	122	122	131.186
11	1	6.09028	2.29046	3	308	298	318	318	144.09
11	1	11	2.32172	3	306	246	236	236	45
11	1	4.69007	2.05709	1	164	94	134	164	168.69
11	1	4.91908	1.60019	1	129	189	169	129	133.919
11	1	8.83365	2.13747	2	269	149	239	149	157.834
11	1	32.2749	1.42564	1	91	181	201	91	123.275
11	1	34.6538	3.25938	2	225	165	65	165	19.6538
11	1	2.1301	2.62631	2	131	141	71	141	143.13
11	1	6.08916	2.20432	2	324	234	314	234	47.9108
11	1	15.607	2.06982	2	174	224	104	224	28.393
11	1	50.1597	3.56867	1	106	136	156	106	55.8403
11	1	23.2161	1.54124	2	64	94	14	94	117.216
11	1	33.3099	3.06573	1	202	172	152	202	168.69
11	1	8.44395	1.83619	3	224	154	164	164	155.556
11	1	24.5308	1.41032	3	121	191	61	61	36.4692
11	1	20.0643	1.63207	2	142	112	152	112	132.064
11	1	4.75098	2.20189	3	222	102	252	252	67.249
11	1	7.55047	2.6434	1	31	151	101	31	38.5505
11	1	12.1094	2.52983	3	190	120	260	260	67.8906
11	1	38.8068	2.13782	1	162	292	152	162	20.8068
11	2	25.4744	3.40743	3	193	203	223	223	17.5256
11	2	21.9315	2.79328	1	217	227	177	217	15.0685
11	2	25.5651	2.68635	1	269	249	159	269	63.4349
11	2	1	1.5578	3	81	181	91	91	90
11	2	16.3474	2.43477	3	249	179	209	209	12.6526
11	2	21.1932	2.57244	2	178	138	198	138	159.193
11	2	1	1.98108	2	194	314	254	314	135
11	2	10.7447	2.97407	1	218	308	168	218	27.2553
11	2	13.2894	3.67851	2	86	116	196	116	129.289
11	2	7.59242	1.94559	3	120	140	190	190	17.5924
11	2	11.4915	1.82172	2	244	134	234	134	145.491
11	2	28.9275	1.4957	2	200	280	220	280	128.928
11	2	20.8991	4.13921	3	29	139	119	119	139.899
11	2	0.130102	2.0076	1	233	83	153	233	53.1301
11	2	6.29714	2.61702	2	172	182	192	182	8.29714
11	2	4.90594	1.79069	3	192	262	172	172	176.906
11	2	19.2643	4.01985	1	159	269	229	159	178.264
11	2	8.87533	2.77767	1	71	91	151	71	79.8753
11	2	1.55967	2.21062	3	248	258	218	218	39.5597
11	2	18.4688	4.8803	2	142	242	252	242	43.5312
11	2	11.7223	1.5672	1	217	157	197	217	25.2777
11	2	17.5463	1.49228	1	124	74	224	124	141.546
11	2	5.47114	2.29563	2	132	42	162	42	36.5289
11	2	22.4711	2.20274	1	194	184	264	194	171.529
11	2	16.7449	1.08418	1	283	243	193	283	119.745
11	2	17.8274	2.74759	3	246	276	166	166	148.173
11	2	17.2648	3.16003	2	90	50	70	50	32.7352
11	2	10.373	2.7926	3	114	94	204	204	13.627
11	2	11.1702	1.54165	2	215	185	165	185	173.83
11	2	33.9795	2.12992	3	136	76	96	96	62.0205
11	3	2.19859	2.20491	3	136	96	66	66	68.1986
11	3	2.35583	1.59841	3	207	227	177	177	174.644
11	3	5.19443	2.68026	2	145	135	295	135	129.806
11	3	28.0343	2.02314	2	130	10	60	10	161.966
11	3	16.9638	1.55363	2	84	104	64	104	120.964
11	3	14.1148	1.27364	3	61	191	101	101	115.115
11	3	2.56505	1.22072	2	184	204	254	204	26.5651
11	3	18.1613	1.42654	2	117	87	157	87	68.8387
11	3	6.13402	2.26044	1	173	313	263	173	166.866
11	3	1.92751	3.26685	3	145	155	165	165	163.072
11	3	54.3474	2.77777	1	113	93	193	113	167.347
11	3	49.9228	1.37873	2	176	276	196	276	145.923
11	3	52.1944	1.396	1	268	208	238	268	140.194
11	3	1.14684	1.97704	3	230	270	200	200	18.8532
11	3	24.2986	1.98623	3	144	154	124	124	148.299
11	3	37.6589	1.49551	1	62	52	72	62	24.3411
11	3	9.9245	2.00294	2	231	191	221	191	20.9245
11	3	22.008	1.86043	1	147	137	37	147	124.992
11	3	20.8285	2.41102	3	48	178	78	78	57.1715
11	3	7	1.40878	3	132	222	232	232	45
11	3	6.08092	1.36229	1	130	110	170	130	136.081
11	3	11.427	4.35505	1	177	207	137	177	8.42697
11	3	7.90915	2.18739	1	174	164	184	174	1.90915
11	3	8.23597	3.52864	2	187	237	287	237	48.764
11	3	26.6026	2.93671	3	241	221	201	201	47.6026
11	3	1.65256	3.50479	1	236	216	286	236	57.6526
11	3	26.3039	2.10425	2	41	191	71	191	37.3039
11	3	1.64101	2.89567	2	179	159	219	159	160.641
11	3	4.83765	3.74722	1	149	109	49	149	144.162
11	3	2.36589	3.15947	3	226	206	96	96	98.3659
11	4	11.4537	2.03255	1	243	333	173	243	51.5463
11	4	20.8214	1.85951	1	229	199	279	229	28.1786
11	4	6.80141	2.02347	2	235	285	245	285	111.801
11	4	16.7352	1.57213	3	164	184	74	74	57.2648
11	4	3.90594	2.5692	3	147	167	187	187	3.09406
11	4	9.29005	3.01742	3	165	285	235	235	64.29
11	4	3.53768	1.60685	2	157	77	87	77	80.5377
11	4	1.97947	2.54064	1	154	224	134	154	152.021
11	4	17.4296	2.12446	2	236	166	196	166	148.57
11	4	2.85316	2.24827	3	194	154	164	164	161.147
11	4	10.751	2.89881	1	78	228	108	78	67.249
11	4	14.2189	2.8623	1	212	232	242	212	46.2189
11	4	23.3578	2.94871	2	224	84	104	84	60.6422
11	4	13.7468	1.30519	1	84	214	94	84	70.2532
11	4	18.2364	2.72068	3	192	272	202	202	40.2364
11	4	1.71085	1.90057	2	244	264	214	264	85.7108
11	4	10.7108	3.43972	3	195	245	285	285	94.2892
11	4	5.32869	2.53412	3	59	29	109	109	103.671
11	4	10.8153	2.57396	1	312	262	282	312	142.815
11	4	0.587339	2.69903	1	16	86	176	16	16.5873
11	4	19.359	3.0303	2	185	315	175	315	154.359
11	4	1	2.26025	3	341	211	181	181	0
11	4	3.69379	2.39074	1	154	224	144	154	157.694
11	4	28.3758	1.64427	2	123	63	33	63	34.6242
11	4	6.92751	1.83826	2	75	145	205	145	151.928
11	4	11.0935	1.4924	3	252	232	172	172	160.907
11	4	38.8309	1.23977	3	155	215	265	265	46.1691
11	4	4.09085	1.87005	2	56	186	176	186	1.90915
11	4	3.2026	1.72895	1	134	104	34	134	137.203
11	4	9.99462	1.03334	2	223	273	283	273	102.995
11	5	37.7258	1.84453	2	281	161	231	161	18.7258
11	5	2.81079	1.33748	1	206	246	216	206	28.8108
11	5	15.0809	1.47375	2	179	239	169	239	43.9191
11	5	23.6442	1.35681	1	254	184	144	254	50.3558
11	5	0.939191	1.92532	3	245	235	135	135	134.061
11	5	14.0169	1.87298	2	129	259	289	259	64.9831
11	5	12.2277	1.18028	3	132	222	192	192	24.2277
11	5	1.38435	1.44094	1	215	135	175	215	36.3844
11	5	15.273	2.43124	3	229	69	59	59	43.727
11	5	18.6901	1.69717	2	35	75	135	75	56.3099
11	5	11.3987	2.06854	3	142	252	232	232	40.6013
11	5	24.8014	1.23908	1	48	28	168	48	23.1986
11	5	25.8852	1.86121	2	179	129	59	129	154.885
11	5	25.7355	1.57978	1	175	95	265	175	149.265
11	5	87.6526	1.91709	1	255	145	95	255	167.347
11	5	9.08877	1.28891	2	189	209	159	209	38.0888
11	5	43.9726	1.75996	1	145	255	295	145	8.97263
11	5	32.9314	1.85676	2	278	198	228	198	165.069
11	5	26.7595	1.77924	1	140	130	200	140	166.759
11	5	13.8336	2.54026	3	119	169	229	229	35.1664
11	5	52.6609	1.39244	2	260	160	210	160	32.6609
11	5	8.43495	1.71354	3	170	310	190	190	18.4349
11	5	14.2777	2.93301	3	69	109	79	79	64.7223
11	5	20	1.98899	1	205	115	185	205	45
11	5	7.25319	1.02631	3	45	85	135	135	127.747
11	5	1.54629	1.29229	1	140	220	80	140	141.546
11	5	7.52057	1.45571	3	190	140	150	150	157.521
11	5	24.9314	1.21001	2	205	125	135	125	149.931
11	5	11.561	2.82391	3	204	174	134	134	145.561
11	5	7.97947	1.69801	2	140	110	80	110	117.979
11	6	19.9042	1.24196	3	145	195	125	125	144.904
11	6	0.00538321	3.2162	3	98	188	58	58	57.9946
11	6	0.695154	1.35793	2	276	146	256	146	145.305
11	6	11.7603	2.6784	3	290	210	120	120	131.76
11	6	26.4655	1.51342	2	24	94	14	94	120.466
11	6	7.20112	1.91295	3	38	198	108	108	115.201
11	6	10.9275	2.53674	2	8	118	98	118	128.928
11	6	11.8845	1.70476	1	153	73	93	153	141.116
11	6	5.18492	2.04055	2	304	224	314	224	49.1849
11	6	7.30993	1.46258	2	149	49	99	49	56.3099
11	6	10.0725	2.10909	2	161	41	71	41	51.0725
11	6	3.52411	2.38103	2	172	192	142	192	15.5241
11	6	13.3475	1.90168	1	202	192	292	202	8.65254
11	6	17.2011	1.81755	1	98	238	68	98	115.201
11	6	12.3099	1.14301	2	184	134	244	134	146.31
11	6	10.444	1.85161	3	51	101	211	211	20.556
11	6	21.0128	1.63843	1	63	143	123	63	41.9872
11	6	17.5014	1.31614	1	41	191	151	41	23.4986
11	6	6.76617	2.08833	3	25	165	45	45	38.2338
11	6	33.1301	1.53117	1	70	150	140	70	36.8699
11	6	33.7244	1.62758	1	294	194	274	294	147.724
11	6	14.2974	1.20561	2	28	38	178	38	23.7026
11	6	24.2415	1.37508	1	52	72	122	52	27.7585
11	6	18.5819	1.40013	2	213	123	233	123	141.582
11	6	18.4682	1.15346	1	240	130	170	240	41.5318
11	6	2.74681	1.72236	3	295	135	215	215	37.7468
11	6	12.7094	2.25391	3	60	120	150	150	137.291
11	6	14.6847	1.81664	3	188	268	238	238	43.3153
11	6	13.5523	2.44642	1	190	120	130	190	23.5523
11	6	3	1.58479	3	197	187	177	177	0
12	1	14.0725	2.77044	1	76	126	176	76	61.9275
12	1	36.2364	2.33559	1	86	56	136	86	49.7636
12	1	1.875	2.81528	2	249	169	189	169	167.125
12	1	5.53768	3.58918	1	195	235	265	195	9.46232
12	1	18.3099	6.41837	3	188	268	308	308	146.31
12	1	1.52754	2.87997	2	204	184	44	184	5.52754
12	1	4.63354	6.83485	3	107	157	127	127	131.634
12	1	22.0772	3.20898	2	212	282	202	282	124.077
12	1	1.52886	2.81849	3	235	185	215	215	36.5289
12	1	8.38435	4.03186	3	38	158	28	28	36.3844
12	1	17.8151	2.27391	2	117	247	157	247	49.1849
12	1	24.8552	8.6447	1	185	275	155	185	160.145
12	1	4.46923	4.2826	2	153	193	93	193	8.53077
12	1	0.40469	4.71389	3	182	122	112	112	111.595
12	1	0.792702	2.7934	2	188	268	178	268	87.2073
12	1	24.125	2.46267	3	343	183	233	233	77.125
12	1	24.6952	3.29353	1	260	170	200	260	55.3048
12	1	9.52886	4.58471	2	113	153	173	153	143.471
12	1	1.50427	2.08953	2	100	30	10	30	31.5043
[truncated: 6,281 more rows]

## Sheet: RRMS
Subject_ID	Block_ID	Response_Error (degree)	Reaction_Time (seconds)	Target_Bar	Bar_1_Orientation (degree)	Bar_2_Orientation (degree)	Bar_3_Orientation (degree)	Target_Bar_Orientation (degree)	Subject_Response_Orientation (degree)
1	1	43	5.95896	3	217	207	227	227	90
1	1	31.5559	7.5793	3	157	117	167	167	135.444
1	1	0.897271	5.39535	2	127	207	227	207	27.8973
1	1	20.5651	6.14461	1	186	336	326	186	26.5651
1	1	6.64762	2.65293	3	151	171	211	211	37.6476
1	1	7.30993	4.21129	1	4	144	74	4	11.3099
1	1	8.6075	3.04508	3	62	152	202	202	13.3925
1	1	50.4612	26.8556	1	80	140	190	80	29.5388
1	1	9.7974	23.7609	1	12	172	52	12	2.2026
1	1	72.3625	7.65251	2	212	132	182	132	24.3625
1	1	1.25512	4.35055	2	126	166	46	166	164.745
1	1	20.8059	4.36278	2	323	273	303	273	113.806
1	1	57.3397	8.0075	1	337	177	187	337	34.3397
1	1	53.1038	3.34054	1	318	208	338	318	11.1038
1	1	47.3814	2.80058	2	182	102	82	102	149.381
1	1	22.6553	2.87441	3	197	317	257	257	54.3447
1	1	57.3808	3.0213	1	225	175	345	225	102.381
1	1	20.706	2.28711	3	268	328	278	278	118.706
1	1	73.0193	5.20625	2	174	84	114	84	10.9807
1	1	11.1363	3.81539	3	271	211	261	261	69.8637
1	1	4.12472	3.24537	3	327	227	197	197	21.1247
1	1	4.82854	2.2637	2	218	118	68	118	122.829
1	1	23.2892	1.93437	1	155	85	145	155	131.711
1	1	11.1134	2.66251	2	20	140	70	140	151.113
1	1	74.9191	5.9815	2	141	121	151	121	46.0809
1	1	72	1.31026	2	228	198	118	198	90
1	1	21.3524	2.72556	1	59	39	139	59	37.6476
1	1	27.2551	4.86553	3	223	253	123	123	150.255
1	1	0.70143	5.12811	3	199	169	149	149	148.299
1	1	7	3.21597	1	128	48	168	128	135
1	2	21.1155	3.05629	2	135	165	305	165	6.1155
1	2	39.7094	4.39492	1	93	63	53	93	132.709
1	2	66.4259	3.04802	3	149	159	99	99	32.5741
1	2	42.4349	1.87453	3	319	169	249	249	26.5651
1	2	46.2505	1.41322	3	200	220	250	250	23.7495
1	2	5.43495	5.20313	2	217	167	287	167	161.565
1	2	52.4633	3.31655	1	108	88	118	108	160.463
1	2	8.17983	2.25641	3	225	115	175	175	3.17983
1	2	10.7436	9.97076	3	99	79	139	139	149.744
1	2	63.8059	1.99928	3	250	200	220	220	156.194
1	2	22	3.75257	3	123	203	293	293	135
1	2	76.9872	3.41745	1	215	125	155	215	138.013
1	2	13.0513	2.2869	1	190	200	240	190	23.0513
1	2	19.3675	1.70206	2	174	154	184	154	173.367
1	2	44.8807	2.60932	2	194	144	104	144	8.88066
1	2	20.3099	3.23492	3	226	206	306	306	146.31
1	2	39.6713	4.99307	2	194	154	114	154	13.6713
1	2	17.185	6.23825	1	104	114	34	104	121.185
1	2	9.60698	3.67647	1	142	102	192	142	151.607
1	2	1.64101	2.39117	1	201	161	101	201	19.359
1	2	79.0142	8.29231	1	105	95	185	105	4.01418
1	2	18.6713	2.06366	2	200	310	230	310	148.671
1	2	19.9831	4.36612	3	135	25	45	45	64.9831
1	2	15.0283	6.87509	1	214	234	264	214	49.0283
1	2	44.6589	2.60566	2	299	249	169	249	24.3411
1	2	5.89624	3.27096	2	294	204	284	204	18.1038
1	2	27.9314	2.79439	2	218	238	198	238	30.0686
1	2	25.0856	1.97527	3	54	44	114	114	139.086
1	2	88.3558	3.24049	2	268	128	238	128	39.6442
1	2	67.4608	15.8625	1	168	158	128	168	100.539
1	3	26.9144	4.59945	3	114	124	104	104	130.914
1	3	11.1134	2.84914	2	85	175	115	175	163.887
1	3	13.6955	4.92325	1	230	190	150	230	36.3045
1	3	3.17065	4.18314	3	217	117	197	197	20.1707
1	3	10.6901	2.82374	2	233	203	143	203	33.6901
1	3	3.53665	3.34596	1	209	199	219	209	25.4633
1	3	10.4349	2.07031	3	168	188	98	98	108.435
1	3	1.96449	4.04121	2	109	229	149	229	50.9645
1	3	78.8043	6.07502	2	54	114	184	114	12.8043
1	3	56.8407	2.22182	2	258	268	108	268	31.1593
1	3	30.2648	2.67156	3	323	213	243	243	32.7352
1	3	2.48461	2.7307	1	182	172	192	182	4.48461
1	3	14.294	1.66672	1	133	243	213	133	118.706
1	3	6	2.51337	3	284	234	264	264	90
1	3	19	1.36099	2	201	251	221	251	90
1	3	26.8189	4.7494	3	99	59	189	189	162.181
1	3	65	3.48961	1	205	135	255	205	90
1	3	69.9144	4.34518	1	299	209	219	299	49.0856
1	3	27	2.10904	1	243	143	223	243	90
1	3	6.49573	3.28451	1	232	252	122	232	58.4957
1	3	16.3475	2.77966	2	95	155	175	155	171.347
1	3	30.8151	3.93274	2	85	215	235	215	4.18492
1	3	22.2856	6.54877	3	155	215	225	225	22.7144
1	3	27	2.66488	3	153	193	63	63	90
1	3	9.56505	1.88732	3	122	132	152	152	161.565
1	3	10.1944	2.06285	1	130	160	110	130	140.194
1	3	25.6507	2.94131	2	255	265	195	265	59.3493
1	3	12.9726	2.26568	1	131	221	161	131	143.973
1	3	4.12401	3.44822	3	299	199	259	259	74.876
1	3	54.8807	5.49049	2	174	134	194	134	8.88066
1	4	54.4774	4.20245	3	234	294	274	274	39.5226
1	4	11.6513	2.71223	1	205	215	95	205	13.3487
1	4	84.3625	2.95755	1	86	146	106	86	170.362
1	4	33.3097	4.29279	3	291	231	281	281	134.31
1	4	2.20011	3.68004	3	149	89	159	159	161.2
1	4	86.3058	3.18332	1	236	246	226	236	142.306
1	4	35.6467	2.97614	2	187	277	237	277	132.647
1	4	3.10273	1.88918	2	209	239	269	239	62.1027
1	4	44	5.77643	1	181	291	161	181	45
1	4	57.7808	4.56915	2	48	138	148	138	15.7808
1	4	4.89079	2.15382	2	127	207	157	207	31.8908
1	4	16.222	7.4102	1	215	205	235	215	18.778
1	4	50.3099	7.09569	2	224	264	154	264	33.6901
1	4	7.03624	2.62672	3	163	273	263	263	75.9638
1	4	7.34618	2.7249	2	212	252	272	252	64.6538
1	4	24.5377	1.96872	1	191	261	301	191	35.5377
1	4	3.80693	2.52139	2	158	228	148	228	44.1931
1	4	10.0239	2.56508	1	113	153	23	113	123.024
1	4	49.7636	1.75401	1	99	39	189	99	49.2364
1	4	13.3402	2.09043	3	58	118	38	38	51.3402
1	4	13.8699	2.76961	3	177	227	157	157	143.13
1	4	29.326	3.08642	1	165	185	145	165	135.674
1	4	14.6538	5.00922	2	45	185	15	185	19.6538
1	4	13.3039	2.47481	2	104	114	144	114	127.304
1	4	1.17983	2.58537	1	223	133	163	223	41.8202
1	4	13.3895	3.65833	2	208	138	108	138	151.39
1	4	1	2.92098	3	149	169	89	89	90
1	4	0	1.84477	3	180	230	270	270	90
1	4	3.34109	3.07136	3	199	249	159	159	155.659
1	4	10.8908	4.46675	3	219	229	159	159	148.109
1	5	8.0284	2.6702	3	184	94	224	224	52.0284
1	5	21.641	2.37155	2	104	94	124	94	115.641
1	5	15.9645	2.89622	3	225	265	215	215	50.9645
1	5	10.1449	6.3559	2	276	236	176	236	45.8551
1	5	29.0856	5.94751	1	70	80	170	70	40.9144
1	5	3.39718	1.67225	1	88	78	68	88	91.3972
1	5	4.31603	5.83502	3	100	70	180	180	4.31603
1	5	80	2.20931	2	310	170	230	170	90
1	5	24.6335	4.13441	3	187	157	107	107	131.634
1	5	11.9638	1.94294	2	196	236	346	236	67.9638
1	5	22.4537	2.29135	3	86	136	106	106	128.454
1	5	5.67639	5.77826	2	181	171	221	171	165.324
1	5	7.02053	3.87539	1	190	200	130	190	17.0205
1	5	15.359	35.4303	1	176	186	96	176	160.641
1	5	13.2902	7.08655	3	95	185	115	115	128.29
1	5	12.5651	1.46175	2	86	76	116	76	63.4349
1	5	48.9558	5.10782	2	182	152	92	152	20.9558
1	5	21.8908	1.55505	1	100	200	160	100	121.891
1	5	8.52881	2.06741	1	131	91	191	131	122.471
1	5	8.3948	4.89027	3	113	143	153	153	144.605
1	5	51.1449	5.38911	3	47	197	97	97	45.8551
1	5	26.9264	2.4181	2	198	268	228	268	61.0736
1	5	35.0892	2.39246	1	187	257	307	187	42.0892
1	5	43.3763	2.52538	1	298	318	218	298	74.6237
1	5	11.0362	3.04904	3	197	217	87	87	75.9638
1	5	9.85316	1.82741	2	189	279	229	279	108.853
1	5	16.9638	2.15316	2	94	104	214	104	120.964
1	5	21.5651	4.63423	3	205	255	95	95	116.565
1	5	25.9638	2.49969	1	130	270	140	130	104.036
1	5	1.0755	2.68703	1	68	238	148	68	69.0755
1	6	11.866	1.59277	3	160	100	110	110	121.866
1	6	71.4054	1.99027	2	244	304	314	304	52.5946
1	6	23.7094	1.57136	3	79	159	109	109	132.709
1	6	13.9625	2.46407	2	125	145	135	145	158.962
1	6	0.726104	3.64687	1	186	96	216	186	5.2739
1	6	5.87787	5.60138	1	216	206	196	216	41.8779
1	6	8.38954	2.82653	3	203	223	233	233	61.3895
1	6	16.373	1.73312	3	185	215	255	255	58.627
1	6	2.62938	1.95661	3	106	196	156	156	158.629
1	6	81.5526	2.99722	2	220	230	100	230	131.553
1	6	35.9638	3.89048	2	145	175	235	175	30.9638
1	6	8.49573	1.79355	3	215	115	175	175	166.504
1	6	28.3987	2.43977	1	69	59	9	69	40.6013
1	6	15.821	2.41308	3	75	165	35	35	19.179
1	6	4.14669	2.09132	1	213	203	253	213	37.1467
1	6	65	1.97408	3	95	35	25	25	90
1	6	76.971	2.75925	2	141	211	151	211	134.029
1	6	44.2249	1.96777	1	249	159	169	249	24.7751
1	6	60.1957	3.18035	1	208	198	348	208	147.804
1	6	15.7899	4.54958	1	166	186	136	166	1.78991
1	6	8.14434	3.61773	1	188	268	98	188	16.1443
1	6	0.159695	3.27918	1	146	76	216	146	145.84
1	6	30.9946	2.17829	2	117	27	67	27	57.9946
1	6	35.6859	2.41124	2	156	256	186	256	40.3141
1	6	11.6425	2.37696	2	56	36	76	36	47.6425
1	6	20.211	3.26584	3	264	284	304	304	144.211
1	6	20.9761	3.42475	2	46	36	156	36	56.9761
1	6	12.0091	2.47474	3	184	174	164	164	176.009
1	6	78.7843	5.66155	1	112	182	192	112	10.7843
1	6	84.8962	2.58799	2	47	77	177	77	161.896
2	1	12.44	2.67908	1	187	197	217	187	19.44
2	1	0.565051	6.09718	1	154	134	144	154	153.435
2	1	22.7436	2.68448	1	53	73	153	53	30.2564
2	1	26.2602	3.33948	1	235	175	335	235	28.7398
2	1	41.5241	2.87156	2	136	116	176	116	74.4759
2	1	19.8699	2.93876	1	197	97	87	197	36.8699
2	1	9.72556	2.32275	1	101	231	201	101	110.726
2	1	15.3578	2.24651	2	254	284	204	284	119.358
2	1	2.80427	3.12103	1	170	200	290	170	167.196
2	1	5.70984	2.75679	2	101	91	51	91	96.7098
2	1	8.31121	3.70933	2	193	243	163	243	54.6888
2	1	66.991	3.08504	3	68	148	118	118	51.009
2	1	6.42957	2.18789	2	145	205	195	205	31.4296
2	1	9.04704	4.88102	3	254	174	164	164	173.047
2	1	23.6952	3.69614	3	169	109	79	79	55.3048
2	1	13.1613	3.62766	2	148	98	168	98	111.161
2	1	5.84277	5.66966	3	111	121	181	181	6.84277
2	1	0.443955	3.44042	3	199	309	249	249	69.444
2	1	9.50436	2.87043	1	187	67	97	187	16.5044
2	1	13.7751	2.11355	3	261	161	281	281	114.775
2	1	87.2364	2.01705	3	173	233	223	223	130.236
2	1	2.19573	3.61473	3	255	155	165	165	167.196
2	1	14.5901	2.4768	1	145	195	115	145	159.59
2	1	12.8807	2.94335	2	196	86	156	86	98.8807
2	1	23.9275	3.23557	2	78	128	138	128	151.928
2	1	9.80141	3.16228	1	33	203	43	33	23.1986
2	1	19.8214	2.35453	3	152	192	222	222	61.8214
2	1	37.008	2.93095	3	112	92	72	72	34.992
2	1	11.3893	2.21897	2	249	309	199	309	140.389
2	1	13.1113	3.3126	2	280	290	320	290	123.111
2	2	23.3402	1.84989	3	248	178	118	118	141.34
2	2	30.0548	2.53254	3	284	274	214	214	3.94519
2	2	25.6888	1.98061	1	151	61	21	151	125.311
2	2	34.2894	2.83762	2	155	275	165	275	129.289
2	2	16.8699	2.75585	2	240	250	170	250	53.1301
2	2	9.80141	3.56435	2	242	192	72	192	21.8014
2	2	50.7495	5.39328	1	333	233	223	333	23.7495
2	2	32.8699	4.88253	3	124	254	274	274	126.87
2	2	0.969741	2.9654	1	49	19	179	49	49.9697
2	2	0.909152	3.78602	2	301	181	161	181	1.90915
2	2	29.5924	2.13914	2	87	237	137	237	27.4076
2	2	11.5792	3.4795	3	176	136	116	116	104.421
2	2	0.175511	4.45838	3	120	230	260	260	79.8245
2	2	14.8991	5.68898	2	60	170	110	170	4.89909
2	2	33.573	2.12799	1	267	187	237	267	53.427
2	2	3.50353	2.52797	2	175	225	165	225	41.4965
2	2	12.1376	2.25625	1	30	200	180	30	42.1376
2	2	47.6914	2.78622	3	174	154	224	224	176.309
2	2	13.4403	2.47167	2	258	188	268	188	174.56
2	2	54.6197	2.97854	2	329	269	239	269	34.3803
2	2	14.0362	1.81164	1	135	235	65	135	120.964
2	2	15.3045	2.49732	1	81	181	161	81	65.6955
2	2	8.69924	2.75682	1	172	212	192	172	163.301
2	2	13.4296	2.40512	2	212	162	192	162	148.57
2	2	29.3099	2.01482	1	243	173	133	243	33.6901
2	2	10.1233	1.81243	1	54	124	84	54	43.8767
2	2	4.96376	2.47425	3	74	144	154	154	149.036
2	2	3.76364	3.16498	3	91	111	181	181	4.76364
2	2	1.43495	6.96197	3	177	257	197	197	18.4349
2	2	12.3859	1.87	3	205	265	235	235	42.6141
2	3	1.38014	3.58484	1	249	219	179	249	67.6199
2	3	9.8787	1.56174	3	172	312	262	262	72.1213
2	3	16.3801	2.45828	1	174	204	284	174	157.62
2	3	14.4712	2.04874	2	202	252	142	252	57.5288
2	3	8.38954	2.97136	1	127	87	217	127	118.61
2	3	27.9454	3.24799	3	228	198	78	78	105.945
2	3	3.52881	5.92262	3	271	251	261	261	77.4712
2	3	34.2564	2.07799	3	281	321	221	221	75.2564
2	3	7.75389	2.67319	1	208	168	278	208	35.7539
2	3	43.8043	2.49202	1	166	186	146	166	122.196
2	3	25.5377	2.67941	2	215	145	135	145	170.538
2	3	8.20011	2.35825	3	273	113	153	153	161.2
2	3	19.992	2.09459	2	150	60	70	60	79.992
2	3	18.7539	3.57008	2	83	163	103	163	144.246
2	3	31.4349	3.42274	2	242	122	142	122	153.435
2	3	89.1859	3.57678	2	193	273	233	273	3.81407
2	3	6.30993	2.87363	3	15	175	185	185	11.3099
2	3	0.113913	2.09258	2	279	289	199	289	108.886
2	3	2.69605	3.56789	1	310	210	170	310	127.304
2	3	71.3987	3.13281	2	127	247	207	247	175.601
2	3	19.3844	1.89247	3	223	173	73	73	53.6156
2	3	13	1.76008	3	192	202	122	122	135
2	3	42.1986	2.4647	1	296	196	246	296	158.199
2	3	1.48955	4.00754	1	181	141	221	181	2.48955
2	3	13.9638	2.44089	3	127	117	197	197	30.9638
2	3	52.2906	2.78273	1	230	180	270	230	177.709
2	3	32.8214	2.49578	1	209	279	179	209	61.8214
2	3	4.30993	2.09136	3	318	288	308	308	123.69
2	3	0.172553	3.3343	2	192	122	62	122	121.827
2	3	1.55605	3.01434	2	181	161	171	161	159.444
2	4	50.866	1.57354	2	171	71	121	71	121.866
2	4	3.39871	2.71537	1	226	76	156	226	49.3987
2	4	5.11134	2.44809	3	142	132	62	62	56.8887
2	4	11.0362	2.341	2	277	267	167	267	75.9638
2	4	13.0375	2.64954	2	202	172	82	172	158.962
2	4	30.6335	1.75592	2	154	214	224	214	3.36646
2	4	35.7449	1.92465	1	186	56	226	186	150.255
2	4	4.12502	4.64041	1	177	167	237	177	172.875
2	4	9.70995	2.19061	2	104	74	114	74	64.29
2	4	4.70984	1.9995	1	178	198	248	178	173.29
2	4	9.24902	2.28133	1	238	188	158	238	67.249
2	4	18.7652	4.53631	1	169	179	139	169	7.76517
2	4	54.3462	2.40819	3	69	19	29	29	154.654
2	4	22.5763	2.36177	1	244	304	314	244	41.4237
2	4	22.2011	1.92225	2	152	222	112	222	19.7989
2	4	9.21103	2.23813	2	100	90	70	90	99.211
2	4	8.03624	1.76473	1	276	306	286	276	104.036
2	4	15.0054	1.33714	3	173	113	73	73	57.9946
2	4	12.1798	2.29729	3	186	176	216	216	48.1798
2	4	26.6598	1.83641	1	192	132	122	192	38.6598
2	4	4.99873	2.71515	2	233	303	253	303	127.999
2	4	26.3099	3.75428	3	255	295	165	165	11.3099
2	4	44.8533	3.14706	3	133	233	143	143	7.85331
2	4	10.1113	3.65521	3	218	188	158	158	168.111
2	4	8.65067	1.84989	2	98	68	58	68	59.3493
2	4	34.7295	2.18805	1	322	292	222	322	176.73
2	4	12.6997	1.84934	2	268	198	218	198	30.6997
2	4	0.696052	2.76378	3	47	177	97	97	97.6961
2	4	10.3039	4.07253	3	18	88	108	108	97.6961
2	4	19.4802	1.95522	3	184	224	244	244	83.4802
2	5	1.11483	1.68646	1	159	49	99	159	160.115
2	5	6	1.38431	3	296	196	276	276	90
2	5	2.69515	1.68171	3	33	123	103	103	100.305
2	5	5.1011	2.29338	1	125	85	95	125	119.899
2	5	39.0679	1.66413	3	258	148	118	118	157.068
2	5	8.09349	2.13863	2	81	191	201	191	19.0935
2	5	51.4759	1.97453	2	212	292	312	292	60.5241
2	5	7.69515	2.02352	1	252	102	202	252	79.6952
2	5	8.0546	2.42552	3	154	124	204	204	15.9454
2	5	18.0169	1.62742	2	197	187	57	187	25.0169
2	5	2.65067	2.50952	1	208	298	318	208	30.6507
2	5	9.9454	3.32504	2	234	174	314	174	164.055
2	5	13.3231	2.5768	2	273	263	223	263	69.6769
2	5	0.366366	2.01788	3	108	88	78	78	78.3664
2	5	2.7357	1.55968	2	124	44	164	44	46.7357
2	5	19.1931	1.95221	1	115	255	215	115	134.193
2	5	1.87599	2.62467	3	63	183	163	163	164.876
2	5	3.1211	2.68252	3	329	319	179	179	2.1211
2	5	4.62087	2.47363	3	130	150	190	190	14.6209
2	5	12.125	2.09272	3	185	165	175	175	7.12502
2	5	17.5924	2.13609	2	245	225	195	225	27.4076
2	5	6.9454	2.00025	2	89	189	149	189	15.9454
2	5	14.7636	1.80987	1	190	160	110	190	175.236
2	5	5.0546	1.9593	3	184	194	204	204	29.0546
2	5	8.63354	3.30348	2	232	192	262	192	3.36646
2	5	2.36749	3.90386	1	234	114	164	234	51.6325
2	5	18.2348	2.24723	1	161	231	101	161	142.765
2	5	3.04541	4.39357	2	49	179	199	179	2.04541
2	5	11.7263	3.34659	1	189	179	259	189	177.274
2	5	36.3987	2.2193	1	167	157	127	167	130.601
2	6	83.4076	1.616	3	104	94	214	214	117.408
2	6	19.7652	2.14958	1	237	197	227	237	37.2348
2	6	9.89727	3.05797	3	173	283	153	153	162.897
2	6	1.36454	2.32881	3	134	74	84	84	85.3645
2	6	3.44395	2.74469	2	184	114	244	114	110.556
2	6	51.3058	2.61301	2	86	136	146	136	7.30576
2	6	16.4349	1.31491	1	88	58	118	88	71.5651
2	6	9.81407	2.1064	1	141	271	181	141	131.186
2	6	8.52881	2.9781	2	66	176	156	176	167.471
2	6	1.47618	2.86272	3	186	196	126	126	127.476
2	6	3.76517	2.49344	3	111	231	221	221	37.2348
2	6	13.6422	3.18484	1	137	87	177	137	150.642
2	6	19.4076	3.04549	2	198	278	218	278	117.408
2	6	3.03624	2.90392	3	241	81	191	191	14.0362
2	6	2.95406	3.49552	3	192	212	262	262	79.0459
2	6	2.90915	3.45102	3	139	259	179	179	1.90915
2	6	11.8753	3.31723	1	202	282	142	202	10.1247
2	6	48.2894	2.52108	2	164	234	214	234	5.71059
2	6	27.5308	2.8129	3	284	144	154	154	126.469
2	6	32.9097	2.55477	1	318	158	148	318	170.91
2	6	34.6769	3.54711	1	235	205	245	235	20.3231
2	6	68.8014	3.6314	2	108	88	158	88	156.801
2	6	5.55226	2.10546	2	223	153	173	153	158.552
2	6	6.96376	1.33717	2	81	201	71	201	14.0362
2	6	25	2.21732	2	300	290	260	290	135
2	6	3.30076	1.46296	2	300	250	230	250	73.3008
2	6	12.4612	2.14162	1	228	198	318	228	60.4612
2	6	0.0887729	1.79392	1	97	247	227	97	96.9112
2	6	11.4349	3.45519	3	163	193	173	173	161.565
2	6	18.1859	2.16151	1	293	243	223	293	131.186
3	1	9.55997	4.09463	2	126	196	156	196	25.56
3	1	12.7106	3.31681	1	128	48	38	128	140.711
3	1	7.43495	3.24073	2	176	146	156	146	153.435
3	1	36.8285	2.4389	1	266	186	276	266	122.829
3	1	42.0169	2.7651	3	273	323	163	163	25.0169
3	1	24.1524	2.9137	2	89	109	229	109	133.152
3	1	9.23636	3.10545	3	131	161	121	121	130.236
3	1	21.7441	4.36103	3	174	74	114	114	135.744
3	1	8.81508	2.7571	1	212	222	162	212	40.8151
3	1	7.08562	3.20962	1	132	102	52	132	139.086
3	1	25.4296	3.34324	3	126	76	96	96	121.43
3	1	15.3665	4.38748	3	233	93	123	123	138.366
3	1	48.9638	3.52079	2	212	252	142	252	120.964
3	1	3.28941	1.69243	3	196	116	216	216	39.2894
3	1	10.0274	2.22381	3	136	306	296	296	126.027
3	1	5.80141	2.60181	1	209	199	239	209	23.1986
3	1	21.8989	3.62738	1	278	118	178	278	119.899
3	1	21.1301	2.99719	3	248	148	238	238	36.8699
3	1	12.7468	3.30269	2	175	155	35	155	142.253
3	1	7.97041	2.29004	3	159	169	259	259	71.0296
3	1	49.4275	3.72919	2	260	160	200	160	29.4275
3	1	81.008	4.31299	1	116	176	256	116	34.992
3	1	17.5928	4.35271	3	213	93	133	133	150.593
3	1	42.9314	2.16099	1	287	307	267	287	149.931
3	1	61.9061	3.36162	2	179	79	219	79	140.906
3	1	14.373	2.79014	2	23	163	193	163	148.627
3	1	4.67686	3.22702	1	245	165	85	245	69.6769
3	1	34.4688	1.78907	2	32	12	72	12	46.4688
3	1	61.0939	2.2425	2	192	292	172	292	50.9061
3	1	9.25319	2.63274	1	133	183	243	133	142.253
3	2	20.6045	2.7761	2	161	81	211	81	60.3955
3	2	0.768289	2.67341	3	66	206	56	56	56.7683
3	2	11.4208	2.11517	1	87	217	237	87	75.5792
3	2	15.5367	3.47982	1	266	286	166	266	70.4633
3	2	26.8767	2.66221	2	187	107	27	107	133.877
3	2	32.8141	1.9491	1	286	206	196	286	138.814
3	2	7.02737	1.51368	1	119	169	219	119	126.027
3	2	11.9625	1.79319	1	78	168	138	78	66.0375
3	2	2.34019	2.05452	1	131	231	81	131	128.66
3	2	4.29136	1.8088	2	310	250	330	250	74.2914
3	2	22	2.16245	2	107	157	17	157	135
3	2	28.4612	2.05514	2	292	212	132	212	60.4612
3	2	30.2648	1.77769	1	207	167	97	207	57.2648
3	2	48.1446	2.25041	1	271	171	121	271	139.145
3	2	21.5041	1.55707	3	156	186	106	106	127.504
3	2	0.274888	1.70987	3	117	177	147	147	146.725
3	2	14.2744	1.77344	3	275	255	145	145	159.274
3	2	12.6013	1.59789	2	182	152	222	152	139.399
3	2	23.7094	1.84754	2	89	109	229	109	132.709
3	2	3.35899	1.87366	1	196	206	156	196	19.359
3	2	36.8624	2.40485	2	149	259	309	259	42.1376
3	2	17.5922	1.9344	2	186	276	196	276	78.4078
3	2	11.1944	1.95033	2	159	219	199	219	50.1944
3	2	11.1449	1.97451	3	333	213	303	303	134.145
3	2	3.78264	1.76754	3	68	228	148	148	151.783
3	2	18.1443	1.62838	3	249	189	129	129	147.144
3	2	6.17851	1.87042	1	27	147	37	27	33.1785
3	2	1.8814	1.96941	3	244	184	134	134	135.881
3	2	10.3196	1.766	3	197	127	157	157	167.32
3	2	2	1.18713	3	122	152	272	272	90
3	3	19.7811	1.97439	1	246	316	206	246	46.2189
3	3	75.5679	3.11416	3	203	273	193	193	88.5679
3	3	39.2249	2.80993	2	169	199	39	199	159.775
3	3	39.8428	5.05573	3	48	158	78	78	38.1572
3	3	25.4711	2.6418	2	152	242	162	242	36.5289
3	3	16.4711	2.44039	3	67	57	127	127	143.471
3	3	20.5597	1.67813	2	161	251	121	251	50.4403
3	3	17.6952	2.0014	1	152	122	232	152	169.695
3	3	4.63354	2.82694	2	63	233	93	233	48.3665
3	3	5.92751	1.55702	2	304	214	144	214	28.0725
3	3	12.6422	2.51743	2	132	222	272	222	29.3578
3	3	21.8263	2.05733	2	111	61	51	61	39.1737
3	3	3.62938	1.86403	2	215	205	145	205	21.3706
3	3	7.79603	2.17442	1	342	312	202	342	169.796
3	3	42.8285	3.50363	2	120	170	210	170	32.8285
3	3	2.29005	3.93522	1	197	227	297	197	19.29
3	3	3.82449	2.247	1	211	51	191	211	34.8245
3	3	4.61966	3.08147	3	59	89	219	219	34.3803
3	3	9	1.11283	3	181	171	81	81	90
3	3	35.9645	2.39244	3	115	45	105	105	140.964
3	3	11.2749	1.90165	1	158	168	138	158	146.725
3	3	14.7843	2.05711	1	229	209	189	229	34.2157
3	3	37.7751	1.67987	1	58	188	118	58	20.2249
3	3	25.8418	2.48269	3	78	178	118	118	143.842
3	3	12.6237	1.62589	1	152	212	242	152	164.624
3	3	12.9298	1.60391	2	96	156	146	156	168.93
3	3	13.5241	2.51716	3	203	233	223	223	29.4759
3	3	18.866	1.72899	1	103	53	183	103	121.866
3	3	26.5651	1.92907	3	95	215	135	135	161.565
3	3	12.3402	1.75345	3	139	179	309	309	141.34
3	4	36.7108	1.7946	1	139	149	189	139	175.711
3	4	6.43283	2.24081	2	219	149	79	149	155.433
3	4	21.4403	2.57256	2	129	299	149	299	140.44
3	4	21.3099	2.14405	3	155	205	125	125	146.31
3	4	11.5597	2.36432	3	52	172	62	62	50.4403
3	4	10.1785	2.329	2	118	158	218	158	168.179
3	4	14.3665	1.78523	1	236	176	216	236	41.6335
3	4	31.2026	1.82209	1	106	76	156	106	137.203
3	4	3.19443	2.69589	2	187	137	117	137	140.194
3	4	7.69007	2.68332	2	314	244	234	244	56.3099
3	4	3.98311	3.11451	1	164	144	124	164	160.017
3	4	7.52411	1.86992	3	232	162	172	172	164.476
3	4	18.9726	2.36898	1	235	155	225	235	36.0274
3	4	31	2.03759	2	154	284	254	284	135
3	4	13.1944	2.1315	3	293	143	233	233	39.8056
3	4	13.751	4.77996	2	141	171	251	171	157.249
3	4	6.43495	2.64523	1	213	193	163	213	26.5651
3	4	34.7989	3.40698	2	175	165	185	165	19.7989
3	4	25.5085	2.04072	2	109	189	239	189	34.5085
3	4	60.0941	3.39091	3	178	168	78	78	138.094
3	4	4.40536	2.14026	1	147	87	47	147	142.595
3	4	15.0941	2.36862	3	68	128	78	78	93.0941
3	4	41	1.42093	1	131	221	111	131	90
3	4	13.0903	5.18767	1	176	236	216	176	9.09028
3	4	58.2011	3.35201	3	183	133	123	123	64.7989
3	4	61.9061	2.18091	1	281	241	221	281	39.0939
3	4	12.9831	2.78198	3	118	88	218	218	25.0169
3	4	45.0725	3.67889	2	273	163	153	163	28.0725
3	4	65	2.44152	3	190	340	250	250	135
3	4	66.6901	3.27175	3	117	87	147	147	33.6901
3	5	15.5924	2.10449	1	223	193	153	223	27.4076
3	5	21.6325	2.36815	3	180	200	300	300	141.633
3	5	50.3462	4.70093	3	165	225	155	155	25.3462
3	5	12.9005	1.8164	3	226	156	126	126	138.9
3	5	36.6942	2.50214	2	271	181	191	181	37.6942
3	5	15.8014	4.14552	3	176	156	96	96	111.801
3	5	39.844	2.88573	3	120	90	170	170	130.156
3	5	10.1213	3.8687	3	72	92	152	152	162.121
3	5	14.9872	1.9914	2	97	207	187	207	41.9872
3	5	0.824489	2.06097	2	246	146	226	146	145.176
3	5	2.61046	1.71565	1	334	324	214	334	151.39
3	5	11.0303	2.31949	1	119	189	159	119	130.03
3	5	11.5104	1.73132	1	211	111	231	211	42.5104
3	5	27.3039	1.6674	1	100	80	230	100	127.304
3	5	14.6901	2.50655	2	29	109	119	109	123.69
3	5	4.60282	1.82549	2	261	231	151	231	46.3972
3	5	18.4477	2.3155	3	152	282	132	132	113.552
3	5	15.0725	1.95962	1	216	286	276	216	51.0725
3	5	45.8753	3.56823	3	99	69	169	169	34.8753
3	5	15.2869	1.77299	2	121	161	111	161	145.713
3	5	18.0738	1.83367	1	298	198	268	298	99.9262
3	5	3.64255	1.616	3	256	266	136	136	132.357
3	5	1.90972	2.07741	3	204	84	34	34	35.9097
3	5	4.13759	2.79269	2	7	97	77	97	92.8624
3	5	0.827447	2.98183	1	284	174	314	284	103.173
3	5	6	1.23889	1	264	204	164	264	90
3	5	31	1.02117	1	59	199	79	59	90
3	5	20.8263	2.11091	2	210	300	320	300	140.826
3	5	15.0605	2.6709	2	153	183	103	183	18.0605
3	5	24.0362	2.52141	2	165	125	215	125	149.036
3	6	27.1145	1.74507	1	218	208	248	218	10.8855
3	6	40.5275	3.07676	1	145	155	125	145	5.52754
3	6	45.6804	1.91982	1	147	157	197	147	12.6804
3	6	43.6335	2.82778	2	143	133	33	133	176.634
3	6	35	3.94962	1	170	180	220	170	135
3	6	16.3499	3.12229	2	11	101	161	101	117.35
3	6	3.17901	1.60574	3	124	34	74	74	70.821
3	6	18.8141	1.45518	2	80	60	130	60	41.1859
3	6	9.1301	1.87748	1	136	196	206	136	126.87
3	6	19.4349	1.56845	1	134	174	154	134	153.435
3	6	2.85601	2.5892	3	117	97	87	87	84.144
3	6	14.9872	1.95453	2	193	153	173	153	138.013
3	6	10.8699	1.57104	2	44	64	94	64	53.1301
3	6	10.5377	1.6559	2	160	290	150	290	99.4623
3	6	9	1.21054	1	261	241	191	261	90
3	6	4.03624	1.30408	1	260	230	280	260	75.9638
3	6	1.53479	3.26396	2	190	150	160	150	148.465
3	6	21.8014	2.68658	3	180	210	90	90	111.801
3	6	71	0.597954	3	251	261	161	161	90
3	6	28	0.863162	2	252	242	192	242	90
3	6	12.008	2.38964	1	47	67	207	47	34.992
3	6	39.4349	3.77102	3	324	314	294	294	153.435
3	6	9.88066	1.69584	3	116	176	136	136	126.119
3	6	22.2338	1.87502	3	64	174	164	164	141.766
3	6	36.1623	1.45425	3	162	242	252	252	35.8377
3	6	77.5312	1.58476	1	124	94	44	124	46.4688
3	6	1.21103	1.85773	2	198	188	178	188	9.21103
3	6	0.0546041	1.64059	3	76	116	16	16	15.9454
3	6	9.38954	2.66276	2	157	187	127	187	16.3895
3	6	2.29061	1.65333	3	145	195	225	225	42.7094
4	1	51.663	8.21549	1	49	139	169	49	177.337
4	1	78.9638	7.42014	2	148	228	158	228	149.036
4	1	72.444	9.38538	3	222	122	132	132	24.444
4	1	22.6861	3.81864	1	219	279	179	219	16.3139
4	1	63.6598	4.46404	3	275	185	205	205	141.34
4	1	46.3112	2.40669	3	336	266	236	236	9.68879
4	1	0.025606	3.01591	3	131	71	161	161	160.974
4	1	69.0941	3.48588	2	74	114	34	114	3.09406
4	1	12.6105	3.86895	3	139	189	209	209	16.3895
4	1	28.8699	2.32371	1	172	162	72	172	143.13
4	1	19.5377	3.24786	3	249	239	209	209	9.46232
4	1	21.2927	3.75437	2	153	113	93	113	134.293
4	1	42.0806	4.85079	2	203	283	213	283	145.081
4	1	23	3.04515	2	128	158	78	158	135
4	1	43.2551	2.74363	1	73	243	103	73	29.7449
4	1	47.8377	2.17983	2	132	192	32	192	144.162
4	1	11.6821	2.75688	2	153	123	113	123	111.318
4	1	9.30993	3.62142	2	113	133	183	133	123.69
4	1	21.8658	2.19147	3	227	307	237	237	35.1342
4	1	2.51045	2.7003	3	130	160	230	230	47.4896
4	1	16	3.43985	3	191	71	61	61	45
4	1	17.9872	2.2301	1	204	274	224	204	41.9872
4	1	27.3236	2.15223	1	153	113	263	153	125.676
4	1	64.8337	3.6886	1	183	143	123	183	67.8337
4	1	13.4759	2.75969	2	24	74	94	74	60.5241
4	1	33.4349	2.05672	3	150	140	30	30	63.4349
4	1	46.7843	2.76262	1	9	99	89	9	55.7843
4	1	80.0941	5.75123	1	212	242	182	212	131.906
4	1	9.53768	4.66378	1	251	271	131	251	80.5377
4	1	4.70984	6.69458	2	138	268	288	268	83.2902
4	2	4.03624	2.93117	2	290	280	150	280	104.036
4	2	21.6901	3.34668	2	293	123	203	123	101.31
4	2	47.4794	2.53521	2	210	160	180	160	112.521
4	2	24.2277	2.63936	1	225	175	235	225	69.2277
4	2	81.5377	2.7573	2	189	179	269	179	80.5377
4	2	52.4429	3.21406	1	294	254	234	294	61.5571
4	2	1.99091	4.06773	3	97	127	47	47	48.9909
4	2	58.8699	4.42623	1	157	207	177	157	98.1301
4	2	14.294	6.07621	1	223	143	213	223	28.706
4	2	22.125	5.90292	3	165	225	255	255	97.125
4	2	6.65981	3.04595	2	168	148	208	148	141.34
4	2	0.744881	2.26421	3	139	99	209	209	29.7449
4	2	11.5923	4.79883	1	113	133	83	113	124.592
4	2	26.1193	3.17635	1	235	205	215	235	81.1193
4	2	24.0754	2.36978	3	147	27	47	47	71.0754
4	2	58.6105	3.53425	3	205	245	195	195	73.6105
4	2	77.5651	4.35023	2	216	186	206	186	108.435
4	2	73.1355	3.14652	1	102	142	112	102	175.135
4	2	61.6598	3.55876	2	32	112	72	112	173.66
4	2	19.4692	3.87147	3	198	268	208	208	8.53077
4	2	2	1.32213	3	308	248	268	268	90
4	2	6.56505	2.44254	3	250	320	290	290	116.565
4	2	10.8014	4.64841	2	136	56	46	56	66.8014
4	2	30.9541	2.38657	3	175	235	155	155	124.046
4	2	27.1715	2.82418	3	290	310	150	150	122.829
4	2	55.4655	2.2181	1	245	255	165	245	120.466
4	2	36.3402	6.70391	2	210	300	180	300	83.6598
4	2	59.0362	6.31892	1	315	325	225	315	75.9638
4	2	16.3099	4.45904	1	320	200	290	320	123.69
4	2	23.1416	2.6574	2	210	140	170	140	163.142
4	3	16.9831	5.65583	2	232	132	152	132	115.017
4	3	20.7276	3.54621	2	171	191	101	191	170.272
4	3	17.9872	4.39061	2	126	156	76	156	138.013
4	3	46.3625	2.50783	3	149	289	259	259	125.362
4	3	27.2602	2.44349	3	144	224	214	214	61.2602
4	3	58.5923	2.22942	1	294	194	314	294	55.4077
4	3	41.1221	3.15911	2	93	173	163	173	131.878
4	3	11.5922	1.83194	2	125	135	185	135	146.592
4	3	4.17255	1.89777	3	156	216	126	126	121.827
4	3	32.4349	3.07769	1	239	249	179	239	26.5651
4	3	54.7106	4.29598	2	294	274	214	274	39.2894
4	3	20.2553	2.2913	3	178	268	218	218	17.7447
4	3	43.1027	4.40632	1	109	229	129	109	152.103
4	3	33.7808	4.87165	3	68	38	18	18	164.219
4	3	17.2894	2.17028	1	68	78	128	68	50.7106
4	3	4.87787	2.59132	3	193	213	323	323	138.122
4	3	73.0306	4.3965	2	134	164	184	164	57.0306
4	3	50.2894	3.1093	1	169	89	159	169	39.2894
4	3	0.633539	1.96503	3	249	239	229	229	48.3665
4	3	18.8428	2.16986	1	147	157	267	147	128.157
4	3	4.25512	2.87081	1	56	16	36	56	60.2551
4	3	25.6526	2.5056	1	148	38	78	148	122.347
4	3	9.56505	1.67315	3	223	143	253	253	63.4349
4	3	59.727	1.56386	2	294	254	154	254	133.727
4	3	8.1233	3.26505	1	232	182	142	232	43.8767
4	3	10.125	2.99147	2	257	177	207	177	7.12502
4	3	38.9061	3.24487	1	258	238	228	258	39.0939
4	3	8.61065	3.3352	3	196	66	176	176	4.61065
4	3	27.1113	1.60728	3	94	114	84	84	56.8887
4	3	45.3039	1.82489	2	178	188	298	188	142.696
4	4	19.8337	3.31219	2	233	273	283	273	112.834
4	4	0.0273734	2.34448	2	144	234	204	234	53.9726
4	4	16.8403	2.74624	1	219	209	249	219	55.8403
4	4	60.9908	3.58123	3	244	124	134	134	73.0092
4	4	29.1715	4.27036	2	298	208	218	208	57.1715
4	4	32.556	3.41711	2	163	213	173	213	65.556
4	4	86.7662	3.95869	1	215	135	225	215	128.234
4	4	8.08562	1.87138	2	151	221	201	221	49.0856
4	4	67	2.27413	3	137	287	157	157	90
4	4	19.9392	2.92978	3	204	184	334	334	134.061
4	4	24.6507	3.49322	1	174	284	274	174	149.349
4	4	80.9452	7.06437	2	172	122	222	122	41.0548
4	4	6.53446	2.88351	1	233	273	153	233	59.5345
4	4	9.8241	2.20592	1	288	198	228	288	117.824
4	4	41.7824	3.36776	2	247	167	147	167	125.218
4	4	29.8156	1.79615	3	178	128	108	108	137.816
4	4	3.31532	4.88974	1	185	205	215	185	1.68468
4	4	9.30053	3.40445	2	147	217	167	217	27.6995
4	4	27	1.99039	1	63	113	43	63	90
4	4	24.8141	1.66744	2	256	246	126	246	41.1859
4	4	26	1.96203	3	134	154	64	64	90
4	4	46	2.97508	3	124	34	44	44	90
4	4	13.5377	3.08799	3	173	133	203	203	9.46232
4	4	7.25644	1.90325	1	157	237	187	157	149.744
4	4	15	2.45062	3	225	185	285	285	90
4	4	25.1941	1.70514	3	179	239	319	319	113.806
4	4	89	3.3086	1	181	21	141	181	90
4	4	75.9869	5.22808	1	54	114	164	54	129.987
4	4	8	3.83789	2	198	278	298	278	90
4	4	14	3.38832	3	264	214	104	104	90
4	5	13.8141	1.74552	2	95	35	55	35	48.8141
4	5	23	2.1823	1	67	207	57	67	90
4	5	33	1.54359	3	127	187	57	57	90
4	5	76	1.30784	2	224	194	324	194	90
4	5	33	1.76368	1	123	183	133	123	90
4	5	88	2.62439	3	292	192	182	182	90
4	5	25	1.12244	1	65	95	75	65	90
4	5	43	4.69416	3	183	83	133	133	90
4	5	11	2.41734	2	81	101	51	101	90
4	5	9	1.51128	1	261	151	181	261	90
4	5	47	1.62282	2	127	137	87	137	90
4	5	50	3.24059	1	140	120	150	140	90
4	5	20.0903	3.27881	3	206	216	146	146	125.91
4	5	19.4222	2.15757	3	189	159	139	139	119.578
4	5	90	1.60185	2	290	180	210	180	90
4	5	73	2.29143	2	183	163	143	163	90
4	5	24	1.73856	3	134	124	114	114	90
4	5	69	1.53864	1	201	121	181	201	90
4	5	57	2.32685	2	87	147	257	147	90
4	5	32	3.44702	1	238	198	178	238	90
4	5	61	1.70513	2	131	151	61	151	90
4	5	8.78112	3.1925	1	305	255	285	305	133.781
4	5	4	6.70609	3	26	96	86	86	90
4	5	18	2.14578	3	222	192	252	252	90
4	5	30	1.39824	3	80	160	120	120	90
4	5	71.7352	2.94359	1	129	169	99	129	57.2648
4	5	2.34778	2.60355	1	129	119	139	129	131.348
4	5	52	2.45337	2	228	218	268	218	90
4	5	6.1155	4.45572	3	175	345	315	315	141.116
4	5	14	4.29837	2	184	104	124	104	90
4	6	24.3048	4.22544	2	171	211	301	211	55.3048
4	6	3	5.09946	3	193	283	183	183	0
4	6	38.0362	3.11062	2	166	196	26	196	157.964
4	6	61	4.71036	1	151	121	101	151	90
4	6	5.03624	2.82197	2	61	171	111	171	165.964
4	6	85	2.21574	1	175	325	255	175	90
4	6	28.2538	3.76547	3	272	252	262	262	53.7462
4	6	88	1.68224	1	182	142	132	182	90
4	6	29.2914	5.47336	3	140	280	270	270	119.291
4	6	27.3803	4.83616	2	87	97	177	97	124.38
4	6	17.1446	3.29028	1	122	172	192	122	139.145
4	6	38.2756	4.20908	2	156	186	86	186	147.724
4	6	70.6476	3.03108	2	163	213	173	213	142.352
4	6	63.9726	2.79684	3	210	240	190	190	126.027
4	6	49.8241	5.29348	2	82	112	122	112	62.1759
4	6	62.2249	2.65675	1	228	248	218	228	110.225
4	6	22.0755	1.78374	1	227	97	217	227	69.0755
4	6	57.6444	2.68085	2	9	99	49	99	156.644
4	6	10.156	2.72777	2	190	150	200	150	139.844
4	6	40.5377	2.968	1	185	245	285	185	144.462
4	6	32.2364	2.39684	3	177	87	107	107	139.236
4	6	80.9638	8.07768	3	153	293	193	193	112.036
4	6	73.3099	4.3604	3	127	17	107	107	33.6901
4	6	57	3.99271	1	237	207	187	237	0
4	6	30.8141	2.87002	1	252	182	262	252	41.1859
4	6	65.7824	2.08098	3	289	139	259	259	144.782
4	6	62.125	1.94409	1	170	260	210	170	52.125
4	6	5.74488	2.98035	3	296	206	246	246	60.2551
4	6	3.74488	1.82915	2	294	244	214	244	60.2551
4	6	31	2.99925	3	31	91	121	121	90
5	1	2.46232	2.61156	1	142	92	252	142	144.462
5	1	1.01311	3.00426	2	81	221	71	221	39.9869
5	1	3.10945	3.05367	3	66	96	116	116	112.891
5	1	1.23383	1.67191	3	243	233	323	323	141.766
5	1	11.6105	2.251	2	247	287	257	287	118.61
5	1	20.3099	1.87757	1	234	154	94	234	33.6901
5	1	2.82141	5.27236	1	211	151	231	211	28.1786
5	1	37.2996	2.4911	1	190	140	180	190	152.7
5	1	6.97493	2.02998	1	130	120	50	130	136.975
5	1	6.8989	2.6405	1	67	37	17	67	60.1011
5	1	3.31455	2.69468	3	82	72	182	182	5.31455
5	1	16.8387	1.75448	2	107	97	147	97	113.839
5	1	13	2.11447	2	177	167	267	167	0
5	1	4.86598	1.67432	3	293	203	243	243	58.134
5	1	0.572544	2.0452	3	230	170	240	240	60.5725
5	1	4.24052	1.74363	2	119	189	49	189	13.2405
5	1	44.971	2.30804	3	151	121	181	181	45.971
5	1	5.0702	2.56345	3	174	74	84	84	78.9298
5	1	3.63658	2.42447	3	163	283	223	223	46.6366
5	1	1.52881	2.18643	2	126	146	156	146	147.529
5	1	6.55226	3.07165	3	193	243	163	163	156.448
5	1	2.52881	3.59463	1	260	210	110	260	77.4712
5	1	4.53446	2.2877	1	215	205	155	215	30.4655
5	1	4.53777	1.87077	1	225	245	235	225	40.4622
5	1	14.8551	1.59359	2	201	121	161	121	135.855
5	1	14.5953	1.46311	1	277	177	327	277	111.595
5	1	84.3086	3.50974	2	223	313	263	313	48.6914
5	1	42.3801	2.7733	3	190	150	200	200	157.62
5	1	2.6075	3.342	2	61	151	51	151	148.392
5	1	17.3852	2.41052	2	334	264	344	264	66.6148
5	2	14.3268	6.21107	2	248	338	298	338	143.673
5	2	10.6341	1.67282	1	116	136	106	116	126.634
5	2	9.78991	2.37954	3	303	243	323	323	133.21
5	2	2.07208	1.78876	2	165	335	195	335	152.928
5	2	0.434949	1.474	1	207	237	297	207	26.5651
5	2	5.46082	2.67703	2	154	164	74	164	169.461
5	2	11.4195	1.88791	2	206	306	276	306	137.42
5	2	1.56859	2.83906	1	171	281	251	171	172.569
5	2	9.35556	1.62128	2	186	76	196	76	66.6444
5	2	15.3801	1.99127	3	162	52	142	142	157.38
5	2	6.30076	2.20443	3	252	242	202	202	28.3008
5	2	10.8545	1.82201	2	210	170	110	170	159.146
5	2	0.969741	1.77615	2	204	184	134	184	4.96974
5	2	21.0362	1.96906	1	263	273	253	263	104.036
5	2	2.25594	2.89392	3	178	208	138	138	135.744
5	2	6.1301	2.96897	1	317	207	187	317	143.13
5	2	33.8068	2.28581	1	290	160	240	290	143.807
5	2	35.9164	2.41307	1	61	191	111	61	25.0836
5	2	12.9042	2.41893	3	102	62	222	222	54.9042
5	2	70.07	1.63262	1	67	127	27	67	137.07
5	2	1.63354	2.58663	3	225	195	175	175	176.634
5	2	8.60219	1.55188	2	177	17	147	17	25.6022
5	2	9.56505	1.45645	3	93	103	163	163	153.435
5	2	16.6507	1.72673	2	161	121	31	121	104.349
5	2	8.58194	1.32303	3	227	237	137	137	128.418
5	2	2.04094	1.63831	1	171	241	141	171	168.959
5	2	7.1186	1.87704	3	173	233	143	143	135.881
5	2	2.51045	3.05156	1	185	195	205	185	2.48955
5	2	6.02507	1.54979	3	177	137	217	217	43.0251
5	2	12.0806	3.08193	2	168	268	188	268	100.081
5	3	11.8153	1.94704	1	176	306	326	176	7.81529
5	3	21.1022	1.93538	2	213	183	143	183	24.1022
5	3	11.3048	1.82375	2	109	89	209	89	100.305
5	3	2.05653	1.3454	1	280	210	270	280	97.9435
5	3	0.181111	1.45403	3	323	193	243	243	62.8189
5	3	8.44719	1.94019	3	256	276	306	306	117.553
5	3	1.07246	1.56055	1	185	235	155	185	6.07246
5	3	10.1847	2.28117	1	162	192	92	162	172.185
5	3	24.5993	1.36012	1	19	39	29	19	174.401
5	3	7.69007	1.51299	3	304	204	244	244	56.3099
5	3	28.1726	2.61664	3	215	295	165	165	13.1726
5	3	0.393019	1.33404	2	212	62	182	62	61.607
5	3	3.44003	1.4305	2	154	254	234	254	70.56
5	3	7.65981	1.50442	2	234	194	174	194	6.34019
5	3	1.96376	1.64801	2	254	164	234	164	165.964
5	3	5.87498	1.70663	1	148	238	208	148	142.125
5	3	9.96377	2.09019	3	42	62	32	32	22.0362
5	3	6.2361	1.58108	3	248	298	308	308	134.236
5	3	12.6561	1.40597	1	114	174	134	114	126.656
5	3	4.82449	1.63158	1	195	75	105	195	10.1755
5	3	9.69007	1.37775	2	96	156	116	156	146.31
5	3	2.03026	1.6508	3	103	113	173	173	175.03
5	3	16.7263	1.54094	2	179	59	159	59	42.2737
5	3	1.17146	1.69761	2	141	191	181	191	12.1715
5	3	2.00798	2.04498	3	177	227	127	127	124.992
5	3	4.39293	1.61518	2	109	229	89	229	53.3929
5	3	8.61046	2.14098	1	70	130	140	70	61.3895
5	3	12.0193	1.27354	3	62	172	112	112	124.019
5	3	4.53768	2.29242	1	166	186	96	166	170.538
5	3	6.01418	1.91176	3	98	188	178	178	4.01418
5	4	4.07961	1.36075	3	131	231	271	271	95.0796
5	4	14.9435	3.56196	1	83	43	153	83	97.9435
5	4	11.4349	1.41608	2	173	263	253	263	71.5651
5	4	2	3.29226	1	137	197	217	137	135
5	4	4.64444	2.67928	3	208	228	298	298	113.356
5	4	17.6992	1.50252	3	64	164	44	44	61.6992
5	4	18.5651	2.14638	1	323	183	273	323	161.565
5	4	12.6335	1.81435	3	209	169	119	119	131.634
5	4	10.0608	2.69179	2	241	191	291	191	0.939191
5	4	1.03948	3.44338	1	53	113	133	53	54.0395
5	4	0.946863	2.40172	3	85	45	95	95	95.9469
5	4	2.43495	2.06703	2	304	344	184	344	161.565
5	4	4.125	2.09722	3	188	198	118	118	122.125
5	4	16.2686	1.75734	1	160	90	150	160	176.269
5	4	2.70785	1.84588	2	237	137	87	137	139.708
5	4	0.83874	1.77628	2	277	337	217	337	156.161
5	4	11.1363	1.67364	2	264	234	154	234	65.1363
5	4	26	1.89217	1	289	139	239	289	135
5	4	1.59531	1.3675	1	200	150	270	200	21.5953
5	4	6.04245	1.18037	1	314	154	234	314	140.042
5	4	2.62416	1.31771	2	162	212	262	212	34.6242
5	4	2.76517	2.90595	3	215	185	265	265	82.2348
5	4	4.99491	1.69704	1	219	169	109	219	43.9949
5	4	4.71059	1.5684	2	209	89	249	89	84.2894
5	4	21.5378	1.7629	1	118	238	218	118	139.538
5	4	2.57422	1.47372	3	238	208	78	78	75.4258
5	4	5.95296	2.47729	2	234	314	284	314	128.047
5	4	9.13759	2.43958	3	263	203	213	213	42.1376
5	4	2.46122	1.45397	3	143	183	193	193	15.4612
5	4	6.07249	2.34451	2	58	158	38	158	151.928
5	5	18.3556	1.34628	3	245	185	265	265	66.6444
5	5	18.9092	1.95493	1	208	148	268	208	46.9092
5	5	13.9575	1.42746	1	116	136	96	116	129.958
5	5	12.8753	1.62121	1	146	176	216	146	158.875
5	5	12.8156	1.1754	1	215	145	185	215	47.8156
5	5	33.4349	2.2727	1	120	150	190	120	153.435
5	5	1.42687	1.70736	2	179	159	129	159	160.427
5	5	0.221967	2.61108	1	289	119	199	289	108.778
5	5	14.7585	1.11283	1	77	57	207	77	62.2415
5	5	3.65222	2.43265	1	225	195	285	225	41.3478
5	5	9.30621	2.3146	3	277	287	167	167	157.694
5	5	9.29957	2.72575	2	123	63	183	63	72.2996
5	5	8.6052	2.0576	3	156	246	316	316	144.605
5	5	5	0.776576	3	215	135	265	265	90
5	5	10.9816	2.48971	2	74	64	144	64	74.9816
5	5	12.9065	2.23295	1	283	293	263	283	115.907
5	5	37.8215	1.53072	1	154	184	224	154	11.8215
5	5	7.76364	1.73121	3	218	198	138	138	130.236
5	5	18.0686	1.33925	3	62	192	102	102	120.069
5	5	13.5686	1.23153	2	121	111	91	111	97.4314
5	5	4.03948	1.99407	2	155	185	115	185	9.03948
5	5	0.9321	2.5109	2	253	203	183	203	22.0679
5	5	16.6914	1.80647	3	158	288	148	148	131.309
5	5	8.30993	1.6559	2	163	273	183	273	101.31
5	5	14.2996	1.41022	3	167	67	77	77	62.7004
5	5	20.8814	1.83219	2	195	335	295	335	134.119
5	5	2.0806	1.89024	2	282	262	202	262	79.9194
5	5	8.99584	1.05741	2	317	297	177	297	108.004
5	5	2	1.22406	3	328	158	268	268	90
5	5	4.82982	2.48212	3	201	61	191	191	6.17018
5	6	3.53999	2.90538	3	30	170	160	160	163.54
5	6	7.67639	2.20118	1	187	227	177	187	14.6764
5	6	5.76361	2.08298	1	260	230	240	260	85.7636
5	6	10.7029	1.77814	1	341	171	301	341	171.703
5	6	0.869898	1.48631	3	239	259	279	279	98.1301
5	6	10.5679	2.30175	2	288	348	218	348	178.568
5	6	4.0535	2.49712	2	262	202	302	202	26.0535
5	6	18.2756	2.33248	2	94	194	164	194	32.2756
5	6	7.0546	1.38836	2	232	112	192	112	119.055
5	6	15.6732	1.53004	1	142	302	132	142	126.327
5	6	64.2364	1.01805	1	159	99	89	159	94.7636
5	6	0.960517	2.32369	3	280	330	190	190	9.03948
5	6	3	1.34351	2	197	267	157	267	90
5	6	6.24611	1.42786	2	133	183	233	183	9.24611
5	6	2.93919	2.00584	3	212	142	182	182	179.061
5	6	0.144786	2.25526	1	110	100	180	110	109.855
5	6	6.34019	1.97764	3	235	225	315	315	141.34
5	6	34.3099	1.14674	1	112	132	152	112	146.31
5	6	27.875	1.40685	2	120	190	170	190	37.875
5	6	37.185	1.68857	1	96	216	146	96	58.815
5	6	8.04704	1.23978	1	75	85	205	75	83.047
5	6	9.97947	1.7898	2	168	288	308	288	117.979
5	6	23.8989	1.6754	1	186	76	126	186	29.8989
5	6	12	2.03399	3	112	212	192	192	0
5	6	6.80679	1.73623	3	113	103	43	43	36.1932
5	6	11.0184	2.12016	3	286	326	176	176	164.982
5	6	22.5889	1.35628	2	133	143	113	143	120.411
5	6	1.73627	2.13286	3	132	162	102	102	103.736
5	6	8.40469	1.60486	3	200	250	210	210	21.5953
5	6	1.22217	2.30237	2	214	234	244	234	55.2222
6	1	12.0939	3.93667	3	237	347	207	207	39.0939
6	1	74.4623	4.18833	2	220	160	80	160	54.4623
6	1	1.96249	4.11354	1	202	222	212	202	23.9625
6	1	3.47618	5.12054	2	226	146	76	146	142.524
6	1	5.30076	4.31632	1	158	88	38	158	163.301
6	1	3.04594	4.12725	3	156	46	76	76	79.0459
6	1	2.19573	6.86421	2	185	165	325	165	167.196
6	1	9.42746	4.95859	1	155	75	5	155	164.427
6	1	6.69007	2.54296	2	152	72	172	72	78.6901
6	1	1.12401	3.4273	3	184	204	284	284	105.124
6	1	3.19573	2.78922	1	61	71	131	61	57.8043
6	1	5.663	3.50653	2	233	183	253	183	177.337
6	1	2.43283	4.53001	2	103	63	163	63	65.4328
6	1	5.47119	6.37008	1	198	168	238	198	12.5288
6	1	0.565051	5.15068	3	236	136	116	116	116.565
6	1	3.60129	3.67493	3	77	127	37	37	40.6013
6	1	3.69424	4.87784	1	169	109	179	169	172.694
6	1	8.15969	4.60855	2	294	244	234	244	55.8403
6	1	8.93151	6.73	3	249	239	159	159	150.068
6	1	0.123303	7.10153	3	251	121	181	181	1.1233
6	1	19.249	6.68098	2	213	183	203	183	22.249
6	1	55.1523	10.1915	1	67	117	47	67	122.152
6	1	10.8845	4.61992	1	118	168	218	118	128.884
6	1	0.00508601	4.7781	3	231	111	181	181	1.00509
6	1	0.130102	7.0193	3	183	63	53	53	53.1301
6	1	3.53768	3.68103	1	257	187	167	257	80.5377
6	1	25.8387	5.04792	2	7	47	157	47	21.1613
6	1	8.43495	4.90598	2	80	190	220	190	18.4349
6	1	8.32361	3.65774	1	112	162	52	112	120.324
6	1	0	2.44033	3	120	130	90	90	90
6	2	0.181641	6.84938	2	98	178	138	178	177.818
6	2	16.9275	5.31534	2	147	157	307	157	173.928
6	2	14	7.15465	2	179	239	229	239	45
6	2	30.5482	8.73119	2	334	344	284	344	133.452
6	2	4.27444	3.28305	3	225	105	155	155	159.274
6	2	1.90049	5.59417	1	92	22	122	92	93.9005
6	2	2.87498	3.25514	1	170	250	260	170	172.875
6	2	3.97263	6.04968	1	175	245	235	175	171.027
6	2	0	1.53191	3	120	170	90	90	90
6	2	48.3257	2.43611	3	140	170	130	130	81.6743
6	2	31.3664	4.85842	1	227	127	217	227	78.3664
6	2	3.12502	3.4489	1	176	246	256	176	172.875
6	2	4.09523	2.38736	1	241	121	251	241	65.0952
6	2	3.53586	5.43313	2	40	170	90	170	166.464
6	2	2.84761	6.93854	2	96	136	56	136	133.152
6	2	0.758541	6.74596	2	218	198	108	198	17.2415
6	2	9.33216	6.46244	3	271	161	311	311	140.332
6	2	33.4725	2.94876	1	309	319	199	309	95.5275
6	2	2.27564	3.21731	2	185	195	265	195	12.7244
6	2	3.5679	2.35087	3	155	125	275	275	91.4321
6	2	1.45371	2.29546	2	57	127	157	127	128.454
6	2	1.5448	6.55444	1	91	201	151	91	92.5448
6	2	6.18492	3.87531	3	258	218	268	268	94.1849
6	2	19.2551	4.99812	1	319	199	279	319	119.745
6	2	1.28941	2.02357	3	333	243	263	263	84.2894
6	2	5.28688	2.20111	1	106	156	136	106	100.713
6	2	2.18492	10.4509	3	142	82	92	92	94.1849
6	2	2.69007	4.29307	3	129	119	149	149	146.31
6	2	18.3391	2.66425	3	264	244	174	174	12.3391
6	2	0.878697	2.53509	2	58	118	108	118	117.121
6	3	12.2364	5.17342	1	197	177	97	197	4.76364
6	3	23.0928	2.39787	1	211	181	111	211	7.90716
6	3	11.2307	3.31938	3	112	72	82	82	70.7693
6	3	7.59012	4.09146	3	168	158	208	208	20.4099
6	3	2.4688	5.25025	2	319	269	239	269	91.4688
6	3	6.81508	4.72456	3	201	271	281	281	94.1849
6	3	15.2894	2.40032	1	249	339	169	249	84.2894
6	3	0.397438	5.09765	2	93	183	153	183	2.60256
6	3	4.96571	3.02104	3	53	33	113	113	108.034
6	3	0.567904	3.35054	3	128	208	88	88	88.5679
6	3	7.88658	4.35074	3	134	304	294	294	106.113
6	3	0.602819	3.92707	1	88	228	258	88	88.6028
6	3	4.5973	4.70685	2	247	157	127	157	152.403
6	3	39.8658	8.00241	2	205	165	105	165	125.134
6	3	5.36246	3.94012	3	155	265	195	195	9.63754
6	3	18.4623	5.16803	2	216	126	146	126	144.462
6	3	2.72951	3.54059	2	206	186	266	186	3.27049
6	3	3.10091	4.72872	2	28	8	58	8	4.89909
6	3	13.6914	4.46462	3	115	265	125	125	138.691
6	3	0.144786	2.08745	1	110	140	170	110	109.855
6	3	19.6901	2.76664	1	166	286	256	166	146.31
6	3	4.56505	4.21936	2	82	112	142	112	116.565
6	3	20.5104	3.38495	1	202	262	282	202	42.5104
6	3	23.8789	8.23393	3	191	271	251	251	47.1211
6	3	1.29735	2.11205	1	295	345	275	295	113.703
6	3	21.4712	3.94363	2	204	214	184	214	12.5288
6	3	3.30395	2.5159	1	304	324	314	304	127.304
6	3	13.3533	4.78375	2	166	146	296	146	132.647
6	3	21.8428	5.99237	1	60	10	50	60	38.1572
6	3	18.9749	5.93374	3	28	98	118	118	136.975
6	4	18.6598	3.86931	1	155	85	165	155	173.66
6	4	4.7927	4.23991	2	132	92	32	92	87.2073
6	4	18.6859	5.59219	1	59	89	169	59	40.3141
6	4	25.1663	11.836	3	188	178	48	48	22.8337
6	4	6.69139	4.06181	3	108	48	138	138	131.309
6	4	11.6013	4.46435	2	284	344	204	344	175.601
6	4	11.0255	2.50316	1	282	342	202	282	113.025
6	4	5.27369	3.25416	1	98	178	208	98	92.7263
6	4	7.85566	5.5209	2	166	156	136	156	163.856
6	4	8.06858	3.37222	3	162	182	112	112	120.069
6	4	8.85566	4.90509	1	110	160	250	110	118.856
6	4	14.561	2.64075	2	199	229	179	229	34.439
6	4	11.8699	4.24692	2	205	245	255	245	53.1301
6	4	5.95296	6.20924	1	271	211	181	271	96.953
6	4	2.0284	3.95866	3	310	170	230	230	52.0284
6	4	6.08916	4.3269	2	104	54	164	54	47.9108
6	4	12.5953	3.93055	2	171	261	221	261	68.4047
6	4	3.21736	6.42673	2	245	115	145	115	118.217
6	4	6.68378	6.83645	3	286	276	176	176	2.68378
6	4	1.56505	7.28248	2	160	70	180	70	71.5651
6	4	18.7263	3.10532	2	221	241	271	241	42.2737
6	4	27.2184	9.19314	3	256	326	266	266	58.7816
6	4	1.34778	5.40608	3	125	195	185	185	3.65222
6	4	29.8699	4.98326	1	218	198	208	218	8.1301
6	4	6.1759	3.28	1	34	114	154	34	27.8241
6	4	9.52886	3.10335	3	78	138	108	108	98.4711
6	4	5.36646	6.93074	3	77	117	47	47	41.6335
6	4	31.3287	4.56235	3	175	245	225	225	13.6713
6	4	1.01128	3.47926	1	246	226	266	246	67.0113
6	4	24.8245	6.78626	1	145	135	185	145	169.824
6	5	14.8637	6.32323	2	240	280	150	280	114.864
6	5	14.2364	6.02519	3	46	186	116	116	130.236
6	5	0.56377	7.98735	2	83	133	13	133	132.436
6	5	18.7603	4.20821	1	67	207	187	67	48.2397
6	5	19.3478	5.76164	2	258	248	308	248	48.6522
6	5	26.4349	8.69822	3	143	153	53	53	26.5651
6	5	3.17018	12.1013	1	93	43	113	93	96.1702
6	5	9.03624	4.56821	2	20	40	90	40	30.9638
6	5	15.7966	5.30895	3	112	42	202	202	6.20345
6	5	14.9638	4.15631	1	119	259	199	119	104.036
6	5	8.28915	2.79679	3	264	144	274	274	85.7108
6	5	10.3008	4.80219	3	177	127	117	117	106.699
6	5	24.8708	4.13951	1	144	194	274	144	168.871
6	5	33.9745	6.25583	2	187	57	127	57	23.0255
6	5	4.16635	9.11442	2	132	252	172	252	67.8337
6	5	1.0702	8.1856	3	160	130	100	100	101.07
6	5	23.6105	5.69381	1	40	20	160	40	16.3895
6	5	7.57422	5.93717	3	82	152	142	142	149.574
6	5	22.0939	4.74506	3	278	178	208	208	5.90614
6	5	15.8002	5.33347	2	322	172	232	172	7.80019
6	5	28.1663	9.41347	2	181	231	121	231	22.8337
6	5	81.7447	4.49866	1	244	174	134	244	162.255
6	5	18.0033	4.39011	1	98	168	58	98	116.003
6	5	8.80838	7.73918	3	149	169	39	39	30.1916
6	5	7.23636	6.79941	2	217	57	77	57	49.7636
6	5	0.137595	4.54435	1	87	107	97	87	87.1376
6	5	22.4349	3.5889	1	221	111	121	221	63.4349
6	5	3.23636	5.60225	1	188	138	28	188	4.76364
6	5	63.1221	6.07531	3	315	195	285	285	41.8779
6	5	87.3048	7.37425	2	157	257	277	257	169.695
6	6	0.695154	3.39691	1	191	151	251	191	10.3048
6	6	14.5024	3.09011	2	225	175	155	175	160.498
6	6	7.58734	6.44894	3	319	159	279	279	106.587
6	6	4.39718	2.8515	1	87	137	37	87	91.3972
6	6	13.9194	3.22982	1	246	286	236	246	79.9194
6	6	5.61861	4.55974	2	230	110	180	110	104.381
6	6	1.5448	10.1364	3	61	81	91	91	92.5448
6	6	16.1663	3.23195	2	141	231	261	231	67.1663
6	6	0.253163	5.01807	2	120	70	130	70	70.2532
6	6	16.2457	4.17131	3	186	126	76	76	92.2457
6	6	27.7462	3.11203	1	206	116	236	206	53.7462
6	6	0	5.33566	3	270	240	180	180	0
6	6	5.56505	3.93547	2	49	159	39	159	153.435
6	6	3	3.12758	1	228	218	198	228	45
6	6	21.875	3.55163	1	286	306	196	286	127.875
6	6	8.64417	4.71229	3	36	26	166	166	174.644
6	6	3.18921	3.35177	1	328	188	308	328	151.189
6	6	19.7652	2.78416	2	253	213	163	213	52.7652
6	6	1.88314	2.67317	3	109	239	129	129	127.117
6	6	0.491477	2.5879	1	305	275	145	305	124.509
6	6	7.47618	3.72129	1	210	260	230	210	37.4762
6	6	21.4623	2.84519	1	303	233	323	303	144.462
6	6	1.60282	2.96785	2	147	267	137	267	88.6028
6	6	22.7106	3.51636	3	22	162	62	62	39.2894
6	6	10.8108	3.39205	2	22	72	162	72	61.1892
6	6	3.87498	3.64531	2	41	101	111	101	97.125
6	6	5.57471	4.26347	2	202	162	262	162	156.425
6	6	22.6952	3.08631	3	27	87	147	147	169.695
6	6	4.29304	2.4776	3	172	242	252	252	76.293
6	6	0.642545	10.6164	3	133	253	223	223	42.3575
7	1	9.52881	2.9813	1	318	208	168	318	147.529
7	1	5.17255	2.13372	1	143	133	23	143	148.173
7	1	19.7512	3.73383	2	286	266	226	266	105.751
7	1	13.8699	3.37383	1	157	177	57	157	143.13
7	1	3.91123	2.4586	2	157	87	217	87	83.0888
7	1	15.5482	2.44927	1	149	249	229	149	133.452
7	1	2.67686	3.67548	2	167	157	177	157	159.677
7	1	3.71312	2.59058	2	163	83	43	83	79.2869
7	1	13.9321	2.61986	3	154	104	234	234	67.9321
7	1	18.1414	4.12536	3	222	282	192	192	30.1414
7	1	3.61046	3.97715	1	245	225	175	245	61.3895
7	1	28.5922	1.81795	3	97	147	107	107	78.4078
7	1	2.07246	3.11185	1	229	209	309	229	51.0725
7	1	5.97947	3.37531	2	82	22	182	22	27.9795
7	1	1.20047	3.0323	2	69	79	39	79	77.7995
7	1	18.641	3.1223	2	193	173	253	173	154.359
7	1	7.21759	3.29387	2	72	152	102	152	144.782
7	1	27.1247	3.02538	3	178	38	208	208	55.1247
7	1	19.8753	2.46751	2	35	105	25	105	124.875
7	1	3.42746	2.94615	1	154	254	114	154	150.573
7	1	11.1022	3.83831	1	167	157	97	167	155.898
7	1	10.1726	2.28454	1	228	88	128	228	58.1726
7	1	10.627	3.17181	3	93	163	3	3	13.627
7	1	14.7263	3.61637	3	297	277	237	237	42.2737
7	1	25.9228	3.07807	3	310	170	240	240	34.0772
7	1	11.359	2.64479	2	52	82	72	82	70.641
7	1	0	1.12664	3	250	300	270	270	90
7	1	33.3948	3.01966	3	148	98	178	178	144.605
7	1	16	2.42467	1	74	204	94	74	90
7	1	19.1847	3.29045	3	172	102	72	72	52.8153
7	2	21.8845	2.27759	1	253	213	173	253	51.1155
7	2	13.3099	2.50468	1	223	123	213	223	56.3099
7	2	34.0939	2.30388	3	305	315	185	185	39.0939
7	2	0.746805	3.21575	2	293	143	253	143	142.253
7	2	23.7449	3.9176	1	231	331	191	231	74.7449
7	2	6.67131	2.40928	1	97	37	117	97	103.671
7	2	13.6209	2.52277	2	104	134	24	134	120.379
7	2	7.20112	2.43049	3	148	208	108	108	115.201
7	2	7.10945	3.3446	1	240	150	280	240	67.1094
7	2	18.139	4.22083	1	167	127	147	167	148.861
7	2	6.29061	3.27447	3	199	239	139	139	132.709
7	2	3.28559	3.15732	2	146	206	156	206	22.7144
7	2	1.65981	3.3016	3	287	147	127	127	128.66
7	2	7.82017	3.25714	2	154	214	164	214	41.8202
7	2	25.3493	3.02384	1	282	222	292	282	127.349
7	2	21.9081	2.31379	1	235	265	195	235	76.9081
7	2	3.7189	3.67338	3	182	132	162	162	165.719
7	2	20.951	3.84419	2	117	277	217	277	117.951
7	2	10.875	2.54207	2	137	47	37	47	57.875
7	2	3.3925	3.08244	2	135	55	205	55	58.3925
7	2	9.98065	2.92968	2	234	134	224	134	124.019
7	2	10.3634	3.12164	3	283	223	213	213	43.3634
7	2	9.78897	4.82946	3	264	214	154	154	144.211
7	2	4.24883	3.01086	1	250	300	180	250	74.2488
7	2	4.60698	3.42476	1	213	203	123	213	28.393
7	2	0.656751	2.78665	2	21	31	11	31	30.3432
7	2	3.66784	3.39991	3	184	234	144	144	140.332
7	2	15.7094	2.48934	3	237	257	297	297	132.709
7	2	15.4802	3.21659	2	143	113	123	113	128.48
7	2	19.8584	2.56192	3	292	282	222	222	61.8584
7	3	1.1233	4.41737	1	180	260	120	180	178.877
7	3	8.56505	3.09488	2	173	333	273	333	161.565
7	3	22.2405	2.45837	3	166	276	126	126	148.241
7	3	7.4742	4.11298	2	51	21	161	21	28.4742
7	3	29.5889	3.57657	1	60	180	200	60	30.4111
7	3	8.05481	2.20146	1	57	127	207	57	48.9452
7	3	30.7436	3.09099	3	154	74	164	164	14.7436
7	3	4.08916	2.16214	3	112	12	52	52	47.9108
7	3	8.11686	1.90674	1	119	59	29	119	127.117
7	3	9.34109	5.26629	1	195	105	185	195	24.3411
7	3	5.01148	3.62469	2	227	187	237	187	12.0115
7	3	14.44	2.29866	1	40	210	60	40	25.56
7	3	16.8989	1.94995	2	97	77	117	77	60.1011
7	3	10.0906	3.02622	3	154	234	214	214	44.0906
7	3	1.52881	3.25242	2	216	326	316	326	147.529
7	3	4.34325	2.39072	3	174	204	64	64	59.6568
7	3	5.95406	2.34006	2	220	130	270	130	124.046
7	3	1.17983	5.00043	3	288	188	268	268	86.8202
7	3	14.029	2.60186	2	150	30	90	30	44.029
7	3	0.486012	3.13909	3	245	315	275	275	94.514
7	3	5.17551	3.29558	2	205	95	135	95	100.176
7	3	6.88866	3.63488	1	140	290	180	140	146.889
7	3	3.90614	3.21701	3	148	238	178	178	174.094
7	3	1.9487	3.3507	2	125	155	35	155	156.949
7	3	5.32453	2.57462	3	63	133	143	143	148.325
7	3	21.0818	2.81583	3	230	150	110	110	131.082
7	3	7.40772	1.99744	2	258	288	208	288	115.408
7	3	4.71059	2.83872	1	89	109	119	89	84.2894
7	3	5.72631	2.96448	1	132	152	142	132	137.726
7	3	2.1759	2.10527	1	120	90	190	120	117.824
7	4	12.3153	2.78221	2	311	211	291	211	43.3153
7	4	7.6075	5.33615	3	66	186	156	156	148.392
7	4	60.4259	3.12412	1	93	13	23	93	32.5741
7	4	62.2749	73.7999	1	151	201	161	151	33.2749
7	4	16.0608	2.78647	3	108	88	118	118	134.061
7	4	13.3625	2.86768	2	251	191	291	191	24.3625
7	4	18.3407	2.24216	2	175	255	135	255	56.6593
7	4	7.6467	2.0727	1	145	65	45	145	137.353
7	4	3.77514	2.1955	3	166	106	66	66	69.7751
7	4	2.88609	2.47288	1	254	174	314	254	71.1139
7	4	4.10217	3.07568	1	179	29	49	179	174.898
7	4	1.20011	2.84657	2	160	20	120	20	18.7999
7	4	4.43086	1.77697	2	98	148	228	148	143.569
7	4	10.3929	2.85781	2	262	182	212	182	171.607
7	4	5.00901	3.04079	1	179	279	219	179	173.991
7	4	4.7274	3.51085	1	166	196	186	166	170.727
7	4	7.11391	3.73433	2	219	199	209	199	26.1139
7	4	0.798876	2.70299	3	264	184	334	334	154.799
7	4	6.1449	2.49777	3	112	122	52	52	45.8551
7	4	1.52263	2.58467	3	208	58	38	38	39.5226
7	4	16.5713	2.14593	1	95	235	85	95	111.571
7	4	0.974394	2.59061	2	15	25	165	25	25.9744
7	4	23.2001	3.61156	1	138	168	158	138	161.2
7	4	6.45371	3.26522	2	148	238	168	238	51.5463
7	4	2.16644	2.67988	2	217	147	57	147	144.834
7	4	5.89727	3.16272	3	127	257	247	247	72.8973
7	4	0.3141	2.83927	3	320	200	310	310	130.314
7	4	15.5074	2.82181	3	139	79	149	149	133.493
7	4	16.541	3.28776	1	85	195	235	85	68.459
7	4	11.6764	2.38274	3	293	283	183	183	14.6764
7	5	3.8989	2.02419	1	116	256	126	116	119.899
7	5	3.57043	2.72498	2	165	145	135	145	148.57
7	5	16.876	1.82469	1	58	108	168	58	74.876
7	5	31.0375	2.17075	3	150	170	100	100	68.9625
7	5	4.36342	2.8875	1	141	201	111	141	136.637
7	5	6.32359	1.86275	3	32	12	132	132	125.676
7	5	12.5953	2.48533	2	241	171	181	171	158.405
7	5	2.02826	2.03222	3	227	217	137	137	139.028
7	5	9.44293	2.68221	1	199	119	189	199	28.4429
7	5	11.9048	3.00146	1	212	242	252	212	20.0952
7	5	5.19859	2.05095	3	168	218	198	198	23.1986
7	5	4.8407	2.48525	1	36	126	176	36	31.1593
7	5	17.0754	2.13211	1	189	109	79	189	26.0754
7	5	12.3852	2.06055	3	219	59	79	79	66.6148
7	5	4.88517	2.70715	3	175	115	165	165	160.115
7	5	8.99462	1.97856	2	234	94	134	94	102.995
7	5	35.7751	3.81992	2	274	214	164	214	69.7751
7	5	13.7398	2.03323	3	125	105	255	255	61.2602
7	5	16.1786	1.95161	3	58	148	168	168	151.821
7	5	6.875	2.47201	2	41	141	181	141	147.875
7	5	14.5778	1.64341	2	135	105	125	105	119.578
7	5	39	2.02905	2	254	174	334	174	135
7	5	10.0306	2.58315	1	47	147	97	47	57.0306
7	5	6.92751	2.16826	3	105	125	145	145	151.928
7	5	1.95296	2.31692	2	150	140	130	140	141.953
7	5	11.9293	2.29684	2	175	135	275	135	146.929
7	5	4.01267	3.33226	3	187	237	157	157	152.987
7	5	6.41108	2.02017	2	266	156	176	156	149.589
7	5	10.8476	2.65003	1	189	279	219	189	178.152
7	5	11.6992	2.17256	1	275	305	215	275	106.699
7	6	1.29331	1.82808	1	323	293	263	323	144.293
7	6	3.32869	1.80606	3	53	123	73	73	76.3287
7	6	1.96249	2.12323	2	157	67	107	67	68.9625
7	6	5.1759	2.34324	3	137	227	237	237	62.1759
7	6	3.57392	2.28353	2	186	226	56	226	49.5739
7	6	34.3231	2.39477	2	111	31	81	31	65.3231
7	6	18.992	2.17597	1	164	44	24	164	145.008
7	6	47.1623	2.40108	2	177	97	117	97	144.162
7	6	27.8557	2.07451	1	46	76	156	46	73.8557
7	6	8.55707	2.6852	1	262	232	252	262	73.4429
7	6	27.2532	2.14061	2	105	205	175	205	52.2532
7	6	4.27049	2.73734	1	224	314	304	224	48.2705
7	6	1.97439	3.50494	2	234	294	144	294	115.974
7	6	11.1944	2.78481	3	184	64	84	84	95.1944
7	6	44.1027	2.60526	2	188	198	288	198	62.1027
7	6	35.5993	2.31875	3	305	285	195	195	50.5993
7	6	11.3139	2.53057	2	165	175	265	175	163.686
7	6	8.81079	2.80265	1	290	220	180	290	118.811
7	6	7	4.60415	2	233	263	153	263	90
7	6	4.74356	2.28137	1	125	145	135	125	120.256
7	6	0.17983	2.76857	3	167	127	177	177	176.82
7	6	4.00798	2.1973	3	129	49	39	39	34.992
7	6	7.70864	2.75819	3	202	142	262	262	74.2914
7	6	0	0.994631	1	90	150	60	90	90
7	6	4.70669	2.12748	2	161	121	11	121	125.707
7	6	18.8241	2.07993	3	131	221	81	81	62.1759
7	6	2	1.32663	1	92	52	62	92	90
7	6	3.33314	2.34261	1	82	62	172	82	85.3331
7	6	19.4762	1.84313	3	112	232	162	162	142.524
7	6	28.1697	3.67331	3	254	244	164	164	135.83
8	1	19	6.16017	2	259	289	129	289	90
8	1	54	5.281	1	144	234	104	144	90
8	1	67.3893	8.548	3	188	58	28	28	95.3893
8	1	14.7398	4.36428	2	69	59	89	59	73.7398
8	1	54	4.99252	2	146	216	166	216	90
8	1	14.1094	0.742185	3	238	78	188	188	22.1094
8	1	86	1.62703	3	166	276	176	176	90
8	1	50.45	4.6213	1	173	153	253	173	122.55
8	1	50.5231	4.21485	2	238	248	278	248	118.523
8	1	90	1.67678	1	180	280	270	180	90
8	1	26.0995	3.55981	2	195	105	245	105	131.1
8	1	22.6335	7.71992	1	161	271	151	161	138.366
8	1	62.3706	2.05978	1	221	171	111	221	158.629
8	1	80.3801	4.79585	1	77	157	227	77	157.38
8	1	17.8336	3.86525	2	57	127	177	127	144.834
8	1	7.25384	4.25943	3	184	274	164	164	171.254
8	1	35.134	6.32175	1	247	207	327	247	31.866
8	1	89.3558	3.15141	2	121	141	241	141	50.3558
8	1	45.3039	2.91978	1	188	98	88	188	142.696
8	1	36.1137	3.2598	3	104	214	84	84	120.114
8	1	20.4321	3.74647	1	154	74	94	154	133.568
8	1	26.2914	3.10269	1	183	233	173	183	29.2914
8	1	35.6366	2.80218	2	241	101	201	101	136.637
8	1	29.5725	4.41526	2	199	149	89	149	119.427
8	1	0.642545	2.5089	3	107	77	137	137	137.643
8	1	15.9321	4.54062	2	307	277	287	277	112.932
8	1	74.3925	2.56505	3	166	86	196	196	121.608
8	1	4	2.86517	3	34	164	94	94	90
8	1	0.47246	3.15982	3	121	111	141	141	140.528
8	1	16.9967	2.86451	3	203	113	43	43	26.0033
8	2	55.2454	3.28234	1	234	204	174	234	178.755
8	2	14.8863	2.67344	2	255	225	305	225	30.1137
8	2	30.6755	3.55615	3	181	71	91	91	121.675
8	2	5.56505	3.91669	1	156	246	116	156	161.565
8	2	20.6193	2.93678	2	143	233	253	233	32.3807
8	2	3.99202	2.33648	2	91	211	141	211	34.992
8	2	43.6215	2.96885	1	275	335	195	275	138.621
8	2	16.9541	4.33339	2	209	309	179	309	145.954
8	2	12.8403	3.55737	2	58	178	98	178	10.8403
8	2	3.36342	2.99806	3	130	40	140	140	136.637
8	2	79.1448	2.76767	1	234	174	304	234	154.855
8	2	85	2.38024	3	315	215	185	185	90
8	2	14.4259	2.32514	3	153	263	133	133	147.426
8	2	5.1301	2.61741	3	23	133	3	3	8.1301
8	2	78.1944	3.0869	1	242	152	212	242	140.194
8	2	17.9946	3.174	3	160	170	50	50	32.0054
8	2	22.707	4.10675	3	91	211	171	171	13.707
8	2	88.0362	3.10631	2	346	286	176	286	14.0362
8	2	38.0395	2.27388	1	286	166	126	286	144.039
8	2	17.1179	1.91708	3	193	303	233	233	35.8821
8	2	1.4552	2.23251	3	56	26	86	86	87.4552
8	2	29.8068	3.77857	3	214	264	204	204	53.8068
8	2	49.8534	2.69203	1	191	131	231	191	141.147
8	2	16.56	3.36692	2	166	36	136	36	19.44
8	2	33.6598	2.12764	2	335	265	245	265	51.3402
8	2	2.97174	3.31189	1	232	322	262	232	49.0283
8	2	21.5367	4.13537	1	133	163	53	133	154.537
8	2	66.3844	4.13513	2	170	150	210	150	36.3844
8	2	32.6861	4.06316	2	226	176	246	176	28.6861
8	2	26.5928	3.30181	1	191	131	121	191	164.407
8	3	18.0458	3.06268	2	164	124	114	124	142.046
8	3	25.0303	3.30932	1	210	80	170	210	4.96974
8	3	19.1726	3.74107	1	186	36	136	186	166.827
8	3	24.71	2.24896	1	224	84	184	224	19.29
8	3	18.4959	3.96378	1	169	159	199	169	7.49586
8	3	33.4768	1.96012	2	278	268	168	268	121.477
8	3	15.6022	4.12464	3	270	230	170	170	154.398
8	3	38	2.33651	3	162	252	232	232	90
8	3	16.1707	3.86434	3	154	174	184	184	20.1707
8	3	22.3634	2.97613	3	181	301	291	291	133.363
8	3	24.8209	2.01609	1	229	329	189	229	24.1791
8	3	6.92625	1.98194	2	148	138	178	138	144.926
8	3	65.6307	6.58288	3	215	235	165	165	50.6307
8	3	29.4774	2.3117	3	99	179	249	249	39.5226
8	3	2.56505	2.54354	1	114	154	214	114	116.565
8	3	80.0643	2.92389	2	122	232	162	232	132.064
8	3	2.17911	3.32728	2	228	248	158	248	65.8209
8	3	55.0954	2.99986	1	151	171	201	151	26.0954
8	3	5.14428	2.361	2	128	218	208	218	32.8557
8	3	23.4926	2.92163	2	170	110	150	110	133.493
8	3	9.96249	2.61336	1	104	174	94	104	113.962
8	3	24.9638	2.76326	3	248	188	268	268	112.964
8	3	5.61396	3.94401	2	183	13	133	13	7.38604
8	3	52.6335	4.25215	1	191	111	61	191	138.366
8	3	32.5638	3.36646	1	165	85	105	165	132.436
8	3	28.1729	3.68324	3	197	207	347	347	15.1729
8	3	33.5686	4.25015	3	114	124	184	184	37.5686
8	3	32.2005	2.73267	2	206	226	266	226	13.7995
8	3	1	3.00472	3	209	59	89	89	90
8	3	9.68468	3.07822	2	197	127	117	127	136.685
8	4	0.592289	3.63435	3	139	119	169	169	169.592
8	4	15.2756	3.94111	3	133	93	163	163	147.724
8	4	22.6336	2.76112	1	236	166	276	236	33.3664
8	4	19.1859	2.3457	1	112	102	162	112	131.186
8	4	4.27444	2.67034	2	185	335	205	335	159.274
8	4	14.0818	2.873	2	143	153	253	153	138.918
8	4	0.273689	4.69984	2	287	177	227	177	177.274
8	4	3.2726	4.6632	2	114	174	14	174	170.727
8	4	14.5889	3.36159	1	225	105	175	225	30.4111
8	4	20.2457	2.96573	1	162	172	122	162	2.24574
8	4	3.23728	2.41051	1	214	204	254	214	30.7627
8	4	17.6961	2.46439	3	205	75	35	35	52.6961
8	4	6.08562	7.27901	3	118	168	88	88	94.0856
8	4	9.91908	2.87754	1	281	181	141	281	91.0809
8	4	23.6713	2.88027	2	145	235	75	235	31.3287
8	4	25.3322	1.6153	2	271	111	211	111	136.332
8	4	11.9074	4.6933	3	281	141	271	271	102.907
8	4	0.841815	3.3365	3	168	158	188	188	8.84181
8	4	8.55261	2.64047	3	153	223	123	123	131.553
8	4	27.4712	1.79893	1	220	90	100	220	12.5288
8	4	16.3814	2.45601	2	257	227	177	227	30.6186
8	4	1.21736	3.14244	2	123	153	193	153	151.783
8	4	3.42957	4.31495	3	243	93	253	253	76.4296
8	4	84.7108	3.29822	1	316	216	286	316	40.7108
8	4	24.4195	4.43762	2	137	157	127	157	132.58
8	4	45.273	3.94771	1	316	326	266	316	1.27303
8	4	26.1523	5.18395	3	104	164	174	174	147.848
8	4	13	2.45268	1	238	148	268	238	45
8	4	24.3153	3.33529	2	191	251	141	251	46.6847
8	4	14.9575	3.447	3	25	165	65	65	50.0425
8	5	38	3.10419	1	263	213	193	263	45
8	5	5.19443	2.49577	3	270	300	180	180	5.19443
8	5	6.79837	3.33131	3	220	70	80	80	73.2016
8	5	4.72951	1.57922	3	177	97	127	127	131.73
8	5	22.4802	2.94845	2	171	151	191	151	173.48
8	5	1.59464	3.00081	1	174	334	234	174	172.405
8	5	29.3706	2.66625	2	173	233	83	233	23.6294
8	5	4.35775	3.08895	1	200	180	120	200	15.6422
8	5	56.7546	3.01602	2	198	238	158	238	1.24536
8	5	38.049	1.78172	2	127	157	107	157	118.951
8	5	64.7928	3.03083	2	236	166	226	166	50.7928
8	5	50.009	3.83265	1	181	131	211	181	51.009
8	5	5.49573	2.11058	3	128	148	188	188	13.4957
8	5	0.228757	2.97409	2	282	212	242	212	32.2288
8	5	9.5679	4.14247	3	86	166	146	146	136.432
8	5	22.6773	4.31469	2	27	37	97	37	14.3227
8	5	18.4759	2.63832	1	281	151	161	281	119.476
8	5	2.03026	3.15674	1	187	167	177	187	4.96974
8	5	56.4007	4.0212	1	163	183	203	163	39.4007
8	5	9.53462	15.595	3	122	92	182	182	11.5346
8	5	78.5231	5.20775	1	310	180	250	310	28.5231
8	5	34.725	2.38051	1	42	32	152	42	7.275
8	5	11.2249	2.58991	2	171	261	131	261	69.7751
8	5	24.641	3.85119	3	171	201	271	271	115.641
8	5	1.65065	2.26937	3	61	41	141	141	142.651
8	5	5.2686	3.48836	1	189	179	199	189	3.7314
8	5	7.79888	2.91173	2	263	213	163	213	25.2011
8	5	5.5679	2.02304	2	107	97	217	97	91.4321
8	5	5.36246	3.18519	3	125	95	255	255	80.3625
8	5	19.7751	5.01032	3	165	125	175	175	155.225
8	6	47.5297	2.60149	1	17	147	67	17	149.47
8	6	24.0608	2.14713	2	144	254	164	254	49.9392
8	6	26.1213	2.69557	1	91	101	211	91	117.121
8	6	48.9831	2.71493	2	204	254	174	254	25.0169
8	6	20.2811	5.19435	2	94	174	204	174	14.2811
8	6	18.8337	2.54375	1	266	256	326	266	67.1663
8	6	9.69515	2.19167	3	225	245	155	155	145.305
8	6	9.12186	1.67273	1	189	229	149	189	18.1219
8	6	5.71529	3.11557	2	113	133	143	133	138.715
8	6	55.308	2.4235	1	223	343	183	223	167.692
8	6	11.9638	2.6016	3	269	159	289	289	120.964
8	6	71.4321	1.01875	2	90	200	80	200	91.4321
8	6	4.2361	3.47289	3	100	240	230	230	45.7639
8	6	9.77783	1.97171	2	325	155	275	155	145.222
8	6	46.3099	3.72429	3	205	245	235	235	101.31
8	6	19.3039	3.06395	1	153	213	243	153	172.304
8	6	7.0546	3.0787	2	243	203	283	203	15.9454
8	6	7	2.94544	3	202	292	142	142	135
8	6	14.5651	2.47804	2	68	78	58	78	63.4349
8	6	58.4349	4.33662	1	175	125	285	175	116.565
8	6	16.7512	1.79248	3	176	296	136	136	119.249
8	6	7.19854	2.82196	3	215	75	55	55	62.1985
8	6	33.2996	3.07988	1	309	329	179	309	162.3
8	6	32.0283	2.60626	3	207	137	107	107	139.028
8	6	0.130102	3.66401	2	43	53	213	53	53.1301
8	6	11.9717	2.87064	3	181	221	151	151	139.028
8	6	77.0042	6.05768	1	239	189	159	239	161.996
8	6	16.0184	2.36801	2	176	166	126	166	149.982
8	6	36.6769	2.78889	1	213	263	243	213	69.6769
8	6	13.9275	1.86602	3	193	113	183	183	16.9275
9	1	16.3764	3.78341	2	204	184	274	184	20.3764
9	1	10.3987	2.40786	1	129	79	199	129	139.399
9	1	0	5.08137	2	120	90	260	90	90
9	1	9.47943	2.93321	2	247	167	267	167	157.521
9	1	11.4007	3.56831	3	32	122	62	62	50.5993
9	1	0.804266	3.66114	1	213	183	293	213	32.1957
9	1	1	1.1557	3	161	121	271	271	90
9	1	0	1.80443	2	50	90	80	90	90
9	1	11.5198	2.58997	1	230	220	110	230	38.4802
9	1	16.5044	3.13925	1	180	200	190	180	163.496
9	1	40.7899	1.88717	2	206	276	326	276	136.79
9	1	13.9638	3.43052	1	163	323	173	163	149.036
9	1	3	1.28839	3	137	97	87	87	90
9	1	16	0.927691	3	276	156	286	286	90
9	1	13.5321	6.34363	3	273	243	263	263	96.5321
9	1	61.6375	3.91573	1	173	53	163	173	54.6375
9	1	78.0506	4.6958	1	231	291	161	231	152.949
9	1	38.5288	5.12308	2	239	289	259	289	147.529
9	1	31.2348	3.40254	1	174	264	164	174	142.765
9	1	18.0939	3.69189	2	199	249	239	249	50.9061
9	1	1.24611	3.03907	3	173	23	53	53	54.2461
9	1	13.8043	2.98945	2	154	224	134	224	57.8043
9	1	13	3.54676	3	18	118	148	148	135
9	1	14.7067	2.22306	2	171	291	271	291	125.707
9	1	0.919076	2.23275	3	247	177	227	227	46.0809
9	1	0.195734	2.115	3	128	208	238	238	57.8043
9	1	17.9454	2.42638	1	268	128	158	268	105.945
9	1	14.6901	3.71664	2	121	251	241	251	56.3099
9	1	1.00538	3.24812	3	176	316	256	256	77.0054
9	1	11.5651	1.93864	1	240	270	170	240	71.5651
9	2	19.2777	2.31946	3	234	174	264	264	64.7223
9	2	30.0892	1.89146	2	208	258	218	258	47.9108
9	2	15.5523	1.99448	3	182	62	172	172	156.448
9	2	16	2.10379	2	111	61	41	61	45
9	2	5.41806	2.56736	3	183	163	213	213	38.4181
9	2	0.962489	2.75628	2	33	23	3	23	23.9625
9	2	8.74684	4.04481	2	51	191	111	191	19.7468
9	2	27	2.11492	1	198	228	98	198	45
9	2	17	2.89049	3	228	158	118	118	135
9	2	10.8779	3.0016	2	271	301	261	301	131.878
9	2	8.38076	2.01914	3	309	199	229	229	57.3808
9	2	22.0454	1.94475	1	115	155	205	115	137.045
9	2	2.30993	2.3491	1	144	214	164	144	146.31
9	2	3.76364	2.95364	1	226	186	126	226	49.7636
9	2	1.32869	2.01798	1	330	210	300	330	148.671
9	2	12.2869	2.4879	2	132	112	172	112	124.287
9	2	24.0239	1.99881	1	171	241	211	171	146.976
9	2	5.1213	3.17616	3	53	73	203	203	17.8787
9	2	22.4759	2.42521	1	187	167	67	187	29.4759
9	2	80.444	2.17933	1	169	139	249	169	69.444
9	2	25	2.56442	2	90	160	50	160	135
9	2	63	1.5691	3	143	93	153	153	90
9	2	19.0725	2.54202	1	279	259	299	279	118.072
9	2	16.5377	2.09822	1	71	131	221	71	54.4623
9	2	2.20112	2.58185	2	193	113	123	113	115.201
9	2	3.50143	2.03873	3	143	233	243	243	66.5014
9	2	31.1785	5.74895	3	208	88	178	178	146.821
9	2	3.46232	3.45707	2	259	129	159	129	125.538
9	2	9.96376	3.29586	3	189	239	339	339	149.036
9	2	9.47246	2.17897	2	190	150	270	150	140.528
9	3	15.1148	2.12053	1	170	130	290	170	154.885
9	3	29.3005	2.17243	1	237	127	197	237	27.6995
9	3	16.4296	2.3772	3	105	185	165	165	148.57
9	3	16.0935	2.25021	1	177	307	197	177	160.907
9	3	14.8624	5.16471	3	42	132	102	102	87.1376
9	3	20.4688	3.10533	1	116	46	156	116	136.469
9	3	22.2737	2.08906	1	250	210	150	250	47.7263
9	3	6.93151	2.48006	3	133	103	113	113	119.932
9	3	4.19859	5.08728	3	214	184	64	64	68.1986
9	3	35.6769	1.81418	3	94	154	214	214	69.6769
9	3	14.3852	1.73991	3	271	291	171	171	156.615
9	3	5.0772	3.00827	1	61	121	81	61	55.9228
9	3	8.8845	3.02579	3	140	120	150	150	141.116
9	3	0.47246	2.19554	1	231	241	221	231	50.5275
9	3	5.43141	2.02498	1	223	233	173	223	37.5686
9	3	27.1342	4.35519	2	182	172	332	172	144.866
9	3	32.7004	1.9715	3	80	220	210	210	62.7004
9	3	27.7352	2.59231	3	195	205	175	175	147.265
9	3	27.4403	2.99753	2	177	157	107	157	129.56
9	3	15.3501	3.88644	2	230	180	330	180	164.65
9	3	4.7398	2.54159	1	201	211	181	201	16.2602
9	3	8.7928	4.17767	2	228	318	198	318	129.207
9	3	33.8789	3.62284	2	249	279	189	279	132.879
9	3	12.4986	1.99653	2	96	146	56	146	158.499
9	3	6.76361	1.90612	2	336	326	176	326	139.236
9	3	69.7843	3.11373	2	206	166	86	166	55.7843
9	3	10.134	3.30538	3	248	228	138	138	148.134
9	3	23.4477	2.76085	2	102	182	212	182	158.552
9	3	3.85861	1.89734	2	216	326	256	326	149.859
9	3	29.9638	1.92472	1	91	171	161	91	120.964
9	4	6.67317	1.86057	2	107	47	137	47	53.6732
9	4	9.06081	2.64408	2	245	215	235	215	44.0608
9	4	4.39744	2.25602	2	178	218	258	218	42.3974
9	4	20.3948	2.92093	3	145	195	165	165	144.605
9	4	30	0.788712	3	220	110	60	60	90
9	4	1.14968	1.7586	3	126	56	116	116	117.15
9	4	26	1.92689	1	251	171	261	251	45
9	4	10.2894	2.06685	1	241	281	251	241	50.7106
9	4	50.1735	2.82929	1	115	185	95	115	165.174
9	4	14.1844	2.38297	1	208	178	288	208	42.1844
9	4	4.78482	1.56801	2	51	131	101	131	135.785
9	4	36.0256	1.70081	2	138	118	168	118	154.026
9	4	19.6901	1.80043	1	76	66	186	76	56.3099
9	4	13.0425	1.75395	1	127	177	207	127	140.042
9	4	10.427	3.59451	2	88	178	108	178	8.42697
9	4	50.7683	3.57572	2	206	276	136	276	146.768
9	4	19.4712	1.80077	3	287	277	257	257	57.5288
9	4	22.641	2.76228	3	198	188	48	48	70.641
9	4	0.557071	2.74307	1	209	109	199	209	28.4429
9	4	27.125	3.49123	3	335	215	185	185	32.125
9	4	8.03624	1.69062	3	141	171	51	51	59.0362
9	4	1.15723	2.39362	3	177	277	127	127	128.157
9	4	4.17859	2.91079	2	124	114	224	114	118.179
9	4	70.7636	2.0705	1	201	281	241	201	130.236
9	4	9.04541	1.65728	2	108	128	168	128	137.045
9	4	20.1155	1.87202	3	261	281	121	121	141.116
9	4	3.19859	2.41892	3	270	190	250	250	66.8014
9	4	32.4474	2.88866	1	164	184	194	164	131.553
9	4	23.4711	2.55985	1	120	170	70	120	143.471
9	4	42.5035	2.17224	2	264	174	274	174	131.496
9	5	0.468801	1.89474	3	291	161	271	271	91.4688
9	5	1.81508	1.53818	2	126	276	196	276	94.1849
9	5	44.5763	2.66204	3	264	214	184	184	48.5763
9	5	33.3039	2.87674	1	184	234	214	184	37.3039
9	5	23.0856	2.64756	2	314	244	214	244	40.9144
9	5	16.3974	1.56194	2	174	154	134	154	137.603
9	5	21.6335	2.05858	1	250	220	130	250	48.3665
9	5	17.3008	1.72921	3	109	179	259	259	61.6992
9	5	8.60282	1.84933	1	280	250	130	280	91.3972
9	5	4.46554	1.50781	2	51	71	31	71	75.4655
9	5	10.5672	1.96358	2	264	284	194	284	114.567
9	5	2.82017	1.35236	1	141	131	111	141	138.18
9	5	5.7603	1.96063	3	164	194	144	144	138.24
9	5	11.6732	3.5375	2	202	222	212	222	53.6732
9	5	5.49573	1.98525	3	63	183	53	53	58.4957
9	5	44.8418	1.35454	1	189	279	139	189	53.8418
9	5	85.5388	2.01107	2	196	146	106	146	60.4612
9	5	59.3008	4.09663	3	241	101	121	121	61.6992
9	5	70.3895	1.43597	1	171	241	301	171	61.3895
9	5	1.56252	1.60243	3	188	148	168	168	169.563
9	5	0.534455	1.42807	1	256	306	146	256	75.4655
9	5	27.4472	1.63801	1	190	180	150	190	162.553
9	5	0.289407	2.40412	1	174	184	104	174	174.289
9	5	14.4633	1.94965	1	169	139	119	169	154.537
9	5	16.1145	2.55395	2	343	333	263	333	169.114
9	5	17.3645	1.8264	2	137	247	277	247	49.6355
9	5	8.61046	1.46051	3	190	140	110	110	118.61
9	5	2.34618	3.0512	3	158	258	248	248	70.3462
9	5	12.0958	1.43743	3	257	197	157	157	144.904
9	5	8.8845	1.64382	2	180	150	160	150	141.116
9	6	12.5231	2.20324	2	236	106	176	106	118.523
9	6	29.7603	1.4929	1	168	218	228	168	138.24
9	6	5	2.42424	3	290	200	220	220	45
9	6	17.8699	1.91411	3	161	221	71	71	53.1301
9	6	15.2927	1.63735	2	31	151	61	151	135.707
9	6	3.44003	1.83586	2	169	119	139	119	115.56
9	6	25.5288	1.96197	2	42	32	122	32	57.5288
9	6	36.6713	2.36651	3	118	278	158	158	121.329
9	6	9.44003	1.53488	2	205	235	295	235	64.44
9	6	4.56505	1.79907	3	212	252	112	112	116.565
9	6	2.64598	2.04033	1	245	265	285	245	62.354
9	6	13.4077	2.19079	1	132	152	192	132	145.408
9	6	22.8377	1.70781	3	293	163	193	193	35.8377
9	6	25.8887	1.95575	3	281	301	211	211	56.8887
9	6	8.09028	1.89626	1	89	179	29	89	80.9097
9	6	25.9625	1.64345	1	182	142	172	182	156.038
9	6	18.486	1.63737	2	288	158	248	158	139.514
9	6	13.0375	2.51153	3	212	192	82	82	68.9625
9	6	7	1.83103	2	202	142	292	142	135
9	6	6.32869	1.96938	1	205	225	135	205	31.3287
9	6	36.2914	1.53372	2	57	7	127	7	150.709
9	6	22.6678	2.07796	1	21	51	111	21	43.6678
9	6	77.1155	1.69685	1	116	106	236	116	38.8845
9	6	20.2894	1.77232	2	49	109	79	109	129.289
9	6	2.95406	1.2651	3	152	162	82	82	79.0459
9	6	4.82017	1.57558	1	307	237	207	307	131.82
9	6	31.8193	1.44884	1	113	163	213	113	144.819
9	6	22.8989	1.53113	3	107	137	277	277	119.899
9	6	88	0.555465	3	148	208	178	178	90
9	6	50.6992	1.94196	2	121	191	251	191	61.6992
10	1	1.87498	4.78529	1	216	146	196	216	37.875
10	1	39.369	6.49948	1	191	131	31	191	151.631
10	1	13	2.27046	1	283	203	253	283	90
10	1	11.7751	2.72923	3	137	87	167	167	155.225
10	1	5.61046	1.76148	2	243	203	223	203	28.6105
10	1	0.52382	2.27457	3	278	258	308	308	127.476
10	1	3.47589	2.53307	2	209	199	179	199	15.5241
10	1	14.6013	2.7969	2	114	154	244	154	139.399
10	1	5.99491	2.40214	3	242	222	232	232	46.0051
10	1	4.77568	2.95556	2	157	237	287	237	52.2243
10	1	19.1221	1.77207	1	209	139	179	209	48.1221
10	1	6.65256	3.27292	1	174	164	194	174	167.347
10	1	38.4711	3.21998	2	265	195	215	195	53.4711
10	1	24.5911	2.60146	3	192	142	112	112	136.591
10	1	8.27772	1.70703	3	123	213	73	73	64.7223
10	1	5.73211	2.20245	1	145	295	275	145	139.268
10	1	5.16126	2.55622	1	241	81	161	241	66.1613
10	1	21.2184	2.89259	2	220	260	230	260	58.7816
10	1	16.6236	2.20023	1	127	177	137	127	110.376
10	1	6.04094	1.91769	3	165	85	95	95	101.041
10	1	8.23067	4.26942	2	31	101	171	101	109.231
10	1	50.4237	2.31204	2	166	126	226	126	176.424
10	1	8.00798	3.67187	1	133	173	233	133	124.992
10	1	4.53446	2.31476	3	275	235	215	215	30.4655
10	1	12.7094	2.88241	3	280	290	150	150	137.291
10	1	28.3925	2.83359	2	170	300	330	300	148.392
10	1	47.1676	4.25565	3	62	122	72	72	119.168
10	1	3.5444	1.90577	1	172	202	222	172	175.544
10	1	61.2505	2.68141	3	280	240	230	230	111.251
10	1	87	3.11366	2	163	273	323	273	0
10	2	0.801459	3.47875	2	152	72	142	72	72.8015
10	2	8.16914	1.89362	2	238	218	138	218	46.1691
10	2	18.8303	1.80111	3	287	207	297	297	135.83
10	2	2.90716	1.70647	2	195	265	255	265	82.0928
10	2	4	0.906573	2	144	274	214	274	90
10	2	71.3257	1.80157	3	107	177	207	207	98.3257
10	2	20.8787	2.37946	1	138	178	208	138	117.121
10	2	1.00416	1.54052	3	77	87	107	107	108.004
10	2	10.9908	2.52877	2	146	186	136	186	16.9908
10	2	55.0928	1.96057	3	162	2	72	72	127.093
10	2	33.4072	1.93652	3	231	171	311	311	164.407
10	2	8.72758	2.0575	1	179	279	239	179	170.272
10	2	6.90524	1.53666	1	109	279	249	109	102.095
10	2	57.541	3.1683	2	206	306	256	306	68.459
10	2	7.0535	3.4611	3	179	99	199	199	26.0535
10	2	61.7742	2.25977	3	222	132	112	112	173.774
10	2	11.8973	2.07431	2	341	331	321	331	162.897
10	2	2.18593	2.053	1	129	109	59	129	131.186
10	2	5.19443	2.15962	3	165	135	225	225	50.1944
10	2	67.7585	4.60036	1	140	160	200	140	27.7585
10	2	26.0546	3.74563	1	177	167	97	177	150.945
10	2	5.86598	1.80577	3	186	176	296	296	121.866
10	2	0.644435	2.12737	1	156	166	76	156	156.644
10	2	17	2.39144	2	132	152	142	152	135
10	2	20.0274	1.81284	1	74	154	164	74	53.9726
10	2	6.44395	4.22222	1	162	222	232	162	155.556
10	2	1	0.792117	1	89	139	229	89	90
10	2	5.03624	2.87347	2	191	171	161	171	165.964
10	2	13.0193	2.85215	3	91	131	111	111	124.019
10	2	0.462322	2.11835	2	211	81	161	81	80.5377
10	3	3.52881	2.22695	1	144	74	34	144	147.529
10	3	10.7223	1.5487	2	191	171	301	171	160.278
10	3	15.9264	1.28936	3	253	163	103	103	118.926
10	3	16.1139	1.81686	1	215	235	165	215	18.8861
10	3	9.02898	1.60673	1	215	105	145	215	44.029
10	3	19.3807	2.21587	2	233	283	243	283	122.381
10	3	8.2643	2.06158	2	285	305	225	305	133.264
10	3	1.844	1.70011	2	192	222	112	222	40.156
10	3	56.3013	2.96734	2	64	164	134	164	40.3013
10	3	61.8337	2.30042	3	151	101	231	231	112.834
10	3	56.93	2.37224	3	224	124	194	194	137.07
10	3	6.47477	3.20477	2	101	11	141	11	17.4748
10	3	0.726311	2.27805	3	163	213	223	223	42.2737
10	3	19.9452	2.82559	1	151	61	141	151	131.055
10	3	83.5085	3.5789	2	199	139	239	139	55.4915
10	3	7.75117	1.76376	3	138	128	98	98	105.751
10	3	45.3086	2.19278	1	94	214	144	94	48.6914
10	3	9	0.989868	3	91	221	81	81	90
10	3	0.255119	2.49119	3	130	210	150	150	150.255
10	3	7.54098	3.05038	2	96	76	106	76	68.459
10	3	1.43141	2.60488	1	231	71	111	231	52.4314
10	3	7.52557	2.58237	3	130	50	80	80	72.4744
10	3	2.74467	2.76703	3	215	205	165	165	162.255
10	3	16.1169	2.524	1	159	89	229	159	142.883
10	3	6.40536	3.6559	2	251	211	231	211	37.4054
10	3	14.3885	3.12617	3	169	79	109	109	123.389
10	3	25.6914	2.91802	1	157	117	237	157	131.309
10	3	17.6764	2.07373	1	198	108	248	198	35.6764
10	3	26.4054	2.54987	1	259	169	329	259	52.5946
10	3	5.60054	2.58905	2	278	188	208	188	13.6005
10	4	1.14669	3.13107	1	126	66	136	126	127.147
10	4	40.4454	4.3158	2	29	169	139	169	29.4454
10	4	4.96376	4.68909	2	81	71	171	71	75.9638
10	4	10.0459	2.64662	3	84	54	114	114	124.046
10	4	7.65065	2.11354	1	315	265	225	315	127.349
10	4	12.7662	3.00891	3	179	189	309	309	141.766
10	4	8.28688	2.37267	1	161	111	51	161	169.287
10	4	1	1.80742	1	224	134	234	224	45
10	4	6.1449	1.51265	3	158	188	218	218	44.1449
10	4	11	2.01656	1	236	216	196	236	45
10	4	7.47119	2.494	2	310	160	190	160	167.471
10	4	2.64762	2.18919	2	245	305	195	305	127.648
10	4	3.54629	2.05852	1	228	158	88	228	51.5463
10	4	0.0817511	2.11295	3	169	159	49	49	48.9182
10	4	4.09349	2.61672	1	195	185	95	195	19.0935
10	4	11.6294	5.28632	3	217	207	327	327	158.629
10	4	28	2.22154	3	132	12	62	62	90
10	4	32	1.59616	1	302	242	202	302	90
10	4	10.6667	1.52192	2	129	139	159	139	128.333
10	4	3.56505	1.78785	3	97	237	67	67	63.4349
10	4	13.0704	1.92121	2	240	190	130	190	23.0704
10	4	14.5297	1.80498	3	136	296	196	196	30.5297
10	4	2.51964	2.67022	2	128	158	178	158	155.48
10	4	41.9037	3.24928	2	162	202	302	202	160.096
10	4	23.2338	1.61885	2	35	75	55	75	51.7662
10	4	9.52881	2.29306	1	183	273	173	183	12.5288
10	4	0	1.16873	2	100	270	250	270	90
10	4	14.5651	2.91758	3	93	233	213	213	18.4349
10	4	6.01837	1.61739	1	336	296	306	336	149.982
10	4	1.57633	3.36694	3	198	138	178	178	176.424
10	5	0.0737545	1.76948	3	180	170	80	80	80.0738
10	5	17.6209	1.68268	2	202	222	72	222	59.6209
10	5	2.75854	2.60995	3	240	170	340	340	162.759
10	5	2.75117	2.06729	3	287	217	257	257	74.2488
10	5	20.4309	1.99406	1	196	66	206	196	36.4309
10	5	13.5308	1.9913	2	270	130	170	130	143.531
10	5	3.19406	2.81267	2	263	243	183	243	66.1941
10	5	6.14684	2.203	3	165	195	335	335	161.147
10	5	68.2737	3.76397	2	204	154	224	154	42.2737
10	5	4.15819	1.3525	2	118	148	138	148	143.842
10	5	10.5924	1.50506	1	277	177	217	277	107.592
10	5	16.6075	1.4248	1	285	205	245	285	121.608
10	5	9.34019	2.41858	3	28	128	48	48	38.6598
10	5	14.9108	2.08045	2	23	33	83	33	47.9108
10	5	9.25051	3.35987	3	218	68	168	168	158.749
10	5	3	1.98479	1	138	288	248	138	135
10	5	51.796	1.53703	1	154	234	174	154	25.796
10	5	18.5778	2.47752	1	259	209	309	259	60.4222
10	5	57	1.27227	1	213	273	183	213	90
10	5	4.43899	5.99166	2	150	210	280	210	34.439
10	5	10.5924	1.57257	3	257	217	277	277	107.592
10	5	5.64225	3.34556	1	215	175	155	215	29.3578
10	5	24.1623	1.91336	1	60	130	110	60	35.8377
10	5	6.55605	1.47342	3	51	201	121	121	114.444
10	5	24.5651	1.91757	2	202	92	42	92	116.565
10	5	8.30861	1.73239	3	163	173	123	123	131.309
10	5	4.69947	1.23593	1	113	253	223	113	117.699
10	5	15.7778	2.47417	2	229	199	149	199	34.7778
10	5	0.914383	2.2537	3	225	165	175	175	175.914
10	5	35.7939	2.59951	2	228	178	198	178	142.206
10	6	16.1593	2.27081	3	165	75	195	195	31.1593
10	6	14	12.9456	1	76	156	146	76	90
10	6	25.5275	1.35707	3	125	115	25	25	50.5275
10	6	3.22775	1.64568	3	109	209	159	159	155.772
10	6	2.39718	2.07214	2	54	134	164	134	136.397
10	6	26.876	2.52331	3	297	147	177	177	150.124
10	6	20.1022	1.81507	2	196	266	276	266	65.8978
10	6	5.57043	1.50927	1	53	103	113	53	58.5704
10	6	2.38014	2.34123	2	45	205	195	205	22.6199
10	6	17.6589	1.32189	1	132	2	172	132	114.341
10	6	79.9638	2.19666	1	176	256	166	176	75.9638
10	6	1.42957	2.13184	3	70	150	60	60	58.5704
10	6	7.89055	2.16409	2	180	150	210	150	157.891
10	6	2.23745	3.05653	2	64	154	4	154	151.763
10	6	5.30187	2.4555	3	262	132	182	182	176.698
10	6	40.6192	1.543	2	147	127	187	127	167.619
10	6	1.22486	1.4261	3	161	41	71	71	69.7751
10	6	2.80251	2.556	1	193	213	203	193	15.8025
10	6	1.74356	1.52802	2	328	238	258	238	59.7436
10	6	16.0256	1.49704	1	183	123	173	183	19.0256
10	6	17.047	3.02016	1	156	206	126	156	173.047
10	6	0.428693	2.73	2	128	158	188	158	158.429
10	6	26	2.60586	3	99	139	19	19	45
10	6	27.8807	1.24836	1	116	146	136	116	143.881
10	6	80.2397	4.97782	2	188	328	278	328	48.2397
10	6	42.8141	1.33863	2	176	276	156	276	138.814
10	6	60.8584	2.10259	1	269	229	239	269	28.1416
10	6	33.8245	1.87816	1	134	104	174	134	100.176
10	6	14.6197	1.8381	3	121	91	41	41	55.6197
10	6	15.7751	1.65892	3	194	164	54	54	69.7751
11	1	14.1931	2.21707	3	170	180	210	210	44.1931
11	1	5.24052	2.26999	2	272	262	142	262	76.7595
11	1	8.69545	2.6167	1	147	127	77	147	155.695
11	1	5.52057	2.81464	1	208	218	238	208	22.4794
11	1	8.43495	2.56453	3	15	125	145	145	153.435
11	1	7.19443	3.03372	2	108	268	168	268	95.1944
11	1	3.82089	1.77528	1	152	262	222	152	155.821
11	1	10.3106	1.72049	2	148	158	108	158	168.311
11	1	11.789	2.3323	1	159	99	109	159	170.789
11	1	9.51045	1.91638	1	237	207	157	237	47.4896
11	1	5.23921	3.16063	3	99	219	199	199	13.7608
11	1	21.9638	1.88452	3	91	31	81	81	59.0362
11	1	5.49148	2.48367	2	250	220	140	220	34.5085
11	1	3.33222	2.35478	1	182	132	172	182	178.668
11	1	2.61986	1.66721	2	285	295	335	295	112.38
11	1	11.1663	1.77006	3	84	14	124	124	112.834
11	1	0.568592	1.27092	3	147	67	127	127	127.569
11	1	9.01279	1.52982	3	259	229	129	129	138.013
11	1	8.03751	1.21789	3	58	88	148	148	156.038
11	1	5.0245	1.65581	1	157	97	87	157	151.975
11	1	11.789	1.53018	2	89	249	149	249	80.789
11	1	2.37625	1.5623	1	77	187	127	77	74.6237
11	1	4.42077	1.65066	3	160	170	80	80	75.5792
11	1	27.1292	1.66933	2	266	196	256	196	168.871
11	1	26.9314	3.96034	1	192	252	162	192	165.069
11	1	14.1022	2.38462	2	200	280	290	280	114.102
11	1	1.57923	1.80604	2	301	331	191	331	149.421
11	1	54.9987	1.41497	1	107	47	137	107	52.0013
11	1	11.8265	1.41274	2	268	138	228	138	149.826
11	1	5.03751	2.00247	3	91	121	151	151	156.038
11	2	3.69545	1.74509	3	143	153	163	163	159.305
11	2	16.7639	1.78117	3	189	139	299	299	135.764
11	2	13.7086	2.41028	1	133	143	233	133	119.291
11	2	19.3895	2.47196	2	188	228	288	228	28.6105
11	2	1.99873	2.11496	3	184	124	54	54	52.0013
11	2	18.4349	1.34652	3	165	185	135	135	153.435
11	2	78.9108	1.8228	2	101	211	111	211	132.089
11	2	16.1193	1.70465	2	200	290	180	290	126.119
11	2	21.8014	1.4205	1	225	175	145	225	23.1986
11	2	12.3401	4.1626	2	172	202	162	202	9.65989
11	2	12.0033	1.55915	3	204	84	104	104	116.003
11	2	13.7595	2.04771	2	132	72	62	72	58.2405
11	2	0.0238676	1.62601	1	102	152	122	102	101.976
11	2	8.19443	2.62	2	227	177	217	177	5.19443
11	2	13.5288	1.33789	2	244	314	224	314	147.529
11	2	5.74356	3.29007	2	101	171	201	171	165.256
11	2	2.36246	2.9089	1	237	137	247	237	54.6375
11	2	5.35745	1.39659	3	273	223	143	143	137.643
11	2	15.8624	2.71367	1	167	117	57	167	2.86241
11	2	11.9065	3.30915	1	166	306	156	166	154.093
11	2	4.9454	1.91675	3	216	206	236	236	60.9454
11	2	10.9541	2.60865	3	50	60	180	180	10.9541
11	2	9	0.226103	1	261	271	241	261	90
11	2	1.29005	1.96087	1	162	282	172	162	160.71
11	2	65.7106	1.70474	1	345	325	335	345	50.7106
11	2	2.03623	3.01672	1	160	190	180	160	157.964
11	2	6.19859	1.78618	2	263	163	133	163	156.801
11	2	29.7131	2.37538	2	151	161	31	161	10.7131
11	2	16.2826	1.92048	3	346	236	176	176	159.717
11	2	9.45184	1.42816	3	124	244	214	214	43.4518
11	3	30.5312	1.74768	3	163	223	193	193	43.5312
11	3	2.0975	1.58362	1	172	42	92	172	169.902
11	3	8.44719	1.83279	2	164	144	94	144	152.447
11	3	9.52557	1.83052	3	173	193	143	143	152.526
11	3	0.916555	1.81651	1	199	229	249	199	18.0834
11	3	4.81079	1.69403	1	294	304	174	294	118.811
11	3	1.59464	1.66579	3	226	126	186	186	7.59464
11	3	50.0772	1.58457	1	164	34	104	164	34.0772
11	3	4.39676	2.82557	3	265	195	205	205	20.6032
11	3	1.81556	1.64359	3	164	244	224	224	42.1844
11	3	12.7436	1.5458	2	318	268	198	268	75.2564
11	3	7.49935	1.78981	2	236	226	286	226	38.5007
11	3	29.5206	1.86733	1	173	253	163	173	22.5206
11	3	1.65222	1.8137	3	142	222	182	182	3.65222
11	3	12.9395	1.5795	2	231	211	141	211	18.0605
11	3	21.4275	1.56471	2	132	262	202	262	60.5725
11	3	2.53177	1.91333	1	231	221	181	231	48.4682
11	3	0.01935	1.28104	1	236	286	246	236	55.9807
11	3	11.8337	1.24831	1	281	291	161	281	112.834
11	3	21.2189	1.71447	3	165	225	295	295	136.219
11	3	9.08916	1.1704	3	157	107	57	57	47.9108
11	3	22.8845	1.26292	2	184	254	214	254	51.1155
11	3	14.8247	1.51782	3	236	296	176	176	161.175
11	3	1.3925	2.06553	2	148	168	78	168	166.608
11	3	1.49573	1.74459	3	223	173	213	213	31.5043
11	3	1.66396	4.29286	2	123	63	83	63	61.336
11	3	1.65012	2.67218	2	64	164	114	164	162.35
11	3	25.7449	2.49106	1	139	119	129	139	164.745
11	3	0.304846	1.9982	2	95	55	175	55	55.3048
11	3	12.2551	2.31167	1	183	253	153	183	15.2551
11	4	7.80693	1.28307	2	158	218	228	218	45.8069
11	4	76	1.05417	2	244	194	164	194	90
11	4	9.40536	1.37805	1	62	182	152	62	52.5946
11	4	25.6561	2.54689	1	259	289	299	259	53.3439
11	4	11.3402	2.33516	3	150	160	140	140	128.66
11	4	6.41266	2.07124	2	207	157	97	157	163.413
11	4	63.459	1.99413	1	140	180	130	140	23.459
11	4	15.7989	2.3195	3	284	144	184	184	19.7989
11	4	1.65533	1.88311	3	216	176	56	56	54.3447
11	4	28.8014	1.85467	1	97	247	77	97	68.1986
11	4	76.0274	1.49716	2	245	185	255	185	81.0274
11	4	4.74488	2.08438	2	190	110	140	110	105.255
11	4	33.8043	1.71603	1	66	176	76	66	32.1957
11	4	11.9697	1.43963	1	232	182	322	232	40.0303
11	4	1.98164	1.17379	3	237	157	197	197	15.0184
11	4	4.81556	1.65848	3	93	213	133	133	137.816
11	4	7.56505	1.4894	1	161	221	201	161	153.435
11	4	15.6242	1.81632	2	209	289	259	289	124.624
11	4	15.7928	1.71826	2	125	235	195	235	39.2072
11	4	6.38139	1.49821	3	178	118	188	188	14.3814
11	4	6.69972	1.3975	3	216	246	336	336	149.3
11	4	24.2724	1.411	2	241	281	251	281	125.272
11	4	1.26451	2.43253	2	112	212	152	212	30.7355
11	4	2.67317	1.84265	3	31	91	141	141	143.673
11	4	6.75753	1.32887	1	186	176	196	186	12.7575
11	4	13.2277	3.68901	2	144	214	114	214	20.7723
11	4	15.7024	1.53585	3	129	109	189	189	24.7024
11	4	9.79837	1.8244	1	173	93	83	173	163.202
11	4	78.2986	1.30615	1	250	310	190	250	148.299
11	4	3.53768	1.21781	3	252	312	212	212	35.5377
11	5	2.42367	1.51285	3	199	59	129	129	131.424
11	5	2.99099	2.72469	1	171	111	131	171	173.991
11	5	22.4349	1.11264	1	229	289	239	229	26.5651
11	5	13.6192	1.07232	1	154	194	34	154	167.619
11	5	3.68038	1.29925	1	81	111	141	81	77.3196
11	5	9.69515	1.3504	2	145	205	75	205	34.6952
11	5	11.5226	1.57512	3	162	172	242	242	50.4774
11	5	1.36454	1.76034	1	219	109	279	219	40.3645
11	5	8.70864	1.56093	3	12	112	142	142	150.709
11	5	2	4.36157	3	318	258	178	178	0
11	5	7.82149	1.04199	1	266	136	236	266	78.1785
11	5	1.99202	1.41604	2	267	237	207	237	55.008
11	5	3.8989	1.58198	3	136	236	116	116	119.899
11	5	8.18471	2.72694	2	226	196	236	196	7.81529
11	5	4.92754	1.25889	2	251	191	151	191	6.07246
11	5	5.34019	1.17749	1	224	204	234	224	38.6598
11	5	6.663	1.71444	3	254	304	184	184	177.337
11	5	22.2551	1.41842	3	202	252	232	232	29.7449
11	5	18.8324	1.2718	3	172	292	132	132	150.832
11	5	26.3302	1.20293	3	188	218	98	98	124.33
11	5	9.49857	1.72446	1	104	64	34	104	113.499
11	5	18.1009	1.86441	2	208	158	78	158	139.899
11	5	8.42594	1.40706	2	164	184	154	184	12.4259
11	5	2.24883	1.41641	1	153	193	183	153	150.751
11	5	46.0546	1.2304	2	258	298	338	298	164.055
11	5	3.85538	1.96052	3	283	263	143	143	139.145
11	5	4.72556	1.53274	2	56	16	76	16	20.7256
11	5	5.32361	0.844901	2	230	110	220	110	104.676
11	5	8.7974	1.51133	2	234	214	224	214	42.7974
11	5	8.46923	1.57499	1	163	123	143	163	171.469
11	6	9.82141	2.90369	3	157	147	187	187	16.8214
11	6	22.5367	2.28726	1	228	198	308	228	25.4633
11	6	18.646	2.11045	1	126	156	186	126	107.354
11	6	8.95755	2.25412	2	211	121	181	121	129.958
11	6	0.393019	1.09228	3	38	208	118	118	118.393
11	6	6.7843	1.14361	1	176	206	226	176	169.216
11	6	19.9831	1.34002	3	85	115	135	135	154.983
11	6	4.68879	1.53645	3	165	285	275	275	99.6888
11	6	2.34019	1.82846	2	136	86	96	86	83.6598
11	6	6.87787	1.41442	2	205	125	145	125	131.878
11	6	5.59281	0.820179	3	220	100	80	80	74.4072
11	6	87.6197	1.92183	1	58	68	48	58	145.62
11	6	1.65382	1.58165	2	217	207	247	207	25.3462
11	6	30.4074	2.74659	1	108	128	138	108	77.5926
11	6	8.81889	1.42669	2	146	126	66	126	117.181
11	6	13.2176	1.21236	2	62	112	172	112	125.218
11	6	2.92625	1.61834	1	187	177	257	187	9.92625
11	6	8.03624	1.76824	3	141	211	51	51	59.0362
11	6	6.55281	0.893078	3	109	129	249	249	62.4472
11	6	0.571307	1.71237	1	249	239	159	249	68.4287
11	6	5.40771	1.68787	2	245	265	185	265	79.5923
11	6	3.70984	1.39927	3	173	93	183	183	6.70984
11	6	9.15723	1.0726	2	99	119	229	119	128.157
11	6	8.56505	0.883739	3	112	102	252	252	63.4349
11	6	6.83765	1.3467	1	61	161	151	61	54.1623
11	6	4.44862	1.16722	1	99	109	39	99	103.449
11	6	0.236358	1.6686	3	60	80	50	50	49.7636
11	6	10.7026	1.34683	1	283	323	183	283	113.703
11	6	2.03751	0.862953	2	134	64	114	64	66.0375
11	6	5.6859	2.32613	2	146	136	86	136	130.314
12	1	4.52411	4.37666	1	79	159	179	79	74.4759
12	1	33	3.16465	2	288	258	238	258	45
12	1	74.4076	4.80928	1	43	123	213	43	117.408
12	1	2.74949	2.76289	1	114	104	144	114	111.251
12	1	10.9987	3.37556	3	93	53	153	153	142.001
12	1	17.1944	3.5763	3	187	237	147	147	129.806
12	1	40.0362	3.34955	1	19	179	89	19	59.0362
12	1	53.3153	4.09002	2	150	190	200	190	136.685
12	1	14.2026	2.28105	2	157	237	127	237	42.7974
12	1	33.6028	3.42001	1	190	130	150	190	43.6028
12	1	26.8253	3.58586	3	214	244	164	164	137.175
12	1	22.5638	3.88264	3	115	145	155	155	132.436
12	1	1.844	2.52169	3	118	218	228	228	49.844
12	1	0.397181	3.36563	3	134	264	224	224	43.6028
12	1	4.06362	4.02652	2	74	134	154	134	129.936
12	1	85.0908	2.62864	3	198	178	138	138	43.0908
12	1	4.63251	3.8142	2	78	178	188	178	173.367
12	1	9.30076	4.34761	3	159	259	109	109	118.301
12	1	12.6075	4.52811	1	71	161	201	71	58.3925
[truncated: 5,021 more rows]

## Sheet: SPMS
Subject_ID	Block_ID	Response_Error (degree)	Reaction_Time (seconds)	Target_Bar	Bar_1_Orientation (degree)	Bar_2_Orientation (degree)	Bar_3_Orientation (degree)	Target_Bar_Orientation (degree)	Subject_Response_Orientation (degree)
1	1	12.3008	10.3182	1	106	76	26	106	118.301
1	1	61.7274	9.16492	2	224	154	124	154	35.7274
1	1	10.93	14.1214	2	138	58	218	58	47.07
1	1	18.8215	5.00498	1	232	222	272	232	33.1785
1	1	14.556	9.06706	3	204	54	84	84	69.444
1	1	52.3845	7.76893	1	303	233	263	303	70.6155
1	1	38.9042	3.78948	1	16	126	96	16	54.9042
1	1	13.1881	6.18658	3	183	73	103	103	116.188
1	1	6.76883	4.23986	1	144	254	174	144	137.231
1	1	26.0826	4.96576	1	210	170	140	210	56.0826
1	1	86.0051	4.6905	1	140	190	160	140	46.0051
1	1	34.4688	3.68873	2	118	168	38	168	133.531
1	1	2.45	7.3687	2	170	190	270	190	12.45
1	1	72	3.01322	1	162	232	122	162	90
1	1	69.2686	5.1757	1	118	168	268	118	48.7314
1	1	7.28941	3.17996	2	162	212	232	212	39.2894
1	1	10.708	4.43704	3	69	149	189	189	19.708
1	1	37.8014	8.48292	2	136	196	226	196	158.199
1	1	14.4623	4.33781	2	106	186	116	186	20.4623
1	1	12.8014	8.05775	3	304	194	324	324	156.801
1	1	42.1237	3.47235	3	176	236	166	166	28.1237
1	1	19.0665	4.1952	3	216	206	196	196	176.934
1	1	29.0445	3.9283	3	180	130	110	110	139.044
1	1	0.814075	3.44054	1	138	188	168	138	138.814
1	1	38.6404	5.32644	2	51	211	171	211	172.36
1	1	1.7261	7.29	3	163	103	173	173	174.726
1	1	20.6209	4.47319	3	256	326	276	276	75.3791
1	1	11.6039	3.23597	2	209	139	99	139	150.604
1	1	61.1572	3.51418	3	137	207	157	157	38.1572
1	1	42.2551	5.4214	2	298	198	248	198	60.2551
1	2	7.54629	3.87691	3	314	244	224	224	51.5463
1	2	71	3.36766	1	206	276	156	206	135
1	2	18.6598	3.05227	1	250	180	190	250	51.3402
1	2	14.9052	4.29497	3	203	143	153	153	167.905
1	2	8.09349	6.0661	2	141	101	11	101	109.093
1	2	51.6821	3.05664	1	163	193	113	163	111.318
1	2	14.6013	5.07938	2	186	206	276	206	40.6013
1	2	8.06858	3.98606	1	292	272	262	292	120.069
1	2	46.3645	2.62333	2	214	84	134	84	130.365
1	2	26	1.42529	1	116	186	26	116	90
1	2	30	2.49125	2	15	75	135	75	45
1	2	8.91123	4.16223	2	153	223	93	223	51.9112
1	2	25.1572	3.15916	2	253	283	203	283	128.157
1	2	17	1.92775	2	167	107	157	107	90
1	2	4.37301	3.75187	1	297	287	267	297	121.373
1	2	24.1886	5.62428	1	153	123	23	153	128.811
1	2	32.5713	3.85392	2	155	285	135	285	72.4287
1	2	8	1.23218	1	98	118	108	98	90
1	2	15.2894	3.55457	3	186	56	66	66	50.7106
1	2	21.5367	7.09079	2	313	223	173	223	64.5367
1	2	31.0128	3.20171	3	197	157	107	107	138.013
1	2	12.6901	3.40336	2	119	69	29	69	56.3099
1	2	3.44774	6.38858	3	192	132	252	252	68.5523
1	2	66	1.49795	1	156	236	206	156	90
1	2	76	3.11342	1	121	191	181	121	45
1	2	44	1.76094	3	306	186	226	226	90
1	2	9.64762	3.4976	3	228	98	208	208	37.6476
1	2	8.27303	4.20481	3	168	118	128	128	136.273
1	2	9.99491	3.28634	3	184	134	124	124	133.995
1	2	45.9704	5.09315	3	83	53	153	153	18.9704
1	3	24.8265	3.26058	3	215	195	305	305	149.826
1	3	5.96961	5.40331	2	278	268	208	268	82.0304
1	3	28.6901	4.52476	3	35	95	85	85	56.3099
1	3	13.8779	2.69632	3	178	258	208	208	41.8779
1	3	10.0577	3.09942	3	116	226	216	216	25.9423
1	3	26.7094	3.17496	1	196	236	136	196	42.7094
1	3	31.0941	2.62421	2	127	197	267	197	48.0941
1	3	11.5601	3.25793	2	125	135	245	135	146.56
1	3	1.9716	2.35259	3	214	254	144	144	142.028
1	3	45.5345	2.72091	1	76	176	166	76	30.4655
1	3	12	1.2529	1	102	52	92	102	90
1	3	74.4349	2.53519	2	111	11	121	11	116.565
1	3	35.2847	5.49555	2	166	186	206	186	41.2847
1	3	6	1.49077	3	184	224	84	84	90
1	3	41.6335	6.97807	2	230	270	290	270	131.634
1	3	32.9869	2.13885	1	83	43	63	83	50.0131
1	3	69.0054	2.53889	1	233	253	273	233	122.005
1	3	13	0.647218	1	257	287	227	257	90
1	3	28.29	3.00946	2	101	81	181	81	109.29
1	3	71	1.15137	2	191	161	111	161	90
1	3	2.21103	5.28802	3	153	213	83	83	80.789
1	3	58	1.75115	1	212	142	62	212	90
1	3	0.927513	2.91157	2	154	164	184	164	163.072
1	3	20.8624	8.19111	3	218	78	198	198	177.138
1	3	17.2035	3.3963	3	105	15	85	85	67.7965
1	3	53	1.21718	1	143	163	203	143	90
1	3	29.8664	1.99102	3	304	264	274	274	64.1336
1	3	38	0.836487	1	52	192	102	52	90
1	3	84.4623	7.84254	2	231	161	131	161	65.4623
1	3	83.8153	4.22451	1	166	256	216	166	82.1847
1	4	5.60698	0.660782	3	26	46	56	56	61.607
1	4	9.275	3.95722	3	202	232	182	182	172.725
1	4	6.92792	4.54716	2	96	146	216	146	152.928
1	4	14.6888	5.80189	2	65	5	155	5	170.311
1	4	28.627	3.82343	2	130	120	90	120	148.627
1	4	10.7808	3.57697	3	205	225	175	175	164.219
1	4	18.7636	3.55414	2	221	121	211	121	139.764
1	4	2.09028	5.05857	3	223	163	173	173	170.91
1	4	83.9454	4.85724	2	307	247	167	247	150.945
1	4	10.2996	2.52787	1	253	173	273	253	62.7004
1	4	77	0.895856	2	197	347	287	347	90
1	4	75.6156	2.99183	2	228	158	128	158	53.6156
1	4	87	4.06439	1	132	242	92	132	45
1	4	9.13897	2.18292	3	302	222	292	292	121.139
1	4	12.9694	2.23193	1	70	130	210	70	57.0306
1	4	0.323592	1.90606	3	256	106	216	216	35.6764
1	4	15.7352	5.82577	3	117	177	107	107	122.735
1	4	8.7816	2.69963	1	130	60	70	130	121.218
1	4	40.2364	6.45504	1	45	165	105	45	4.76364
1	4	28.0513	3.35274	2	195	95	85	95	66.9487
1	4	5.57406	2.44196	3	23	33	63	63	57.4259
1	4	53.2415	1.65607	1	9	179	49	9	62.2415
1	4	1.47618	4.18199	2	304	144	234	144	142.524
1	4	4.98164	2.25509	3	185	245	205	205	29.9816
1	4	69.2072	2.54141	2	185	285	195	285	174.207
1	4	3.63607	1.95342	1	130	190	110	130	133.636
1	4	8.32359	1.93031	1	136	226	186	136	144.324
1	4	9.54098	2.5624	1	147	287	127	147	156.541
1	4	1.68615	3.40711	3	67	117	207	207	28.6861
1	4	35.556	2.1127	1	60	140	150	60	24.444
1	5	30.0942	2.41365	1	127	157	47	127	157.094
1	5	33.3179	4.29165	1	123	143	173	123	156.318
1	5	8.43623	2.76271	2	216	146	276	146	137.564
1	5	2.11686	2.4556	1	125	225	275	125	127.117
1	5	15.4077	3.12988	3	130	70	80	80	64.5923
1	5	82.5297	4.80228	1	218	98	168	218	120.53
1	5	23	2.77937	2	103	113	223	113	90
1	5	7.0546	10.5962	3	308	328	338	338	150.945
1	5	16.0459	2.23	1	252	112	232	252	55.9541
1	5	15.1481	2.48805	1	166	216	296	166	150.852
1	5	17	2.33509	3	288	148	298	298	135
1	5	22.3402	3.07124	2	271	151	211	151	128.66
1	5	56.0274	1.73019	1	290	190	130	290	53.9726
1	5	68	1.56233	2	68	158	118	158	90
1	5	7.32453	1.75107	2	119	219	209	219	31.6755
1	5	12.5388	3.5194	3	273	193	163	163	150.461
1	5	15.9321	1.94739	1	173	83	73	173	157.068
1	5	0.798876	3.18371	2	244	154	164	154	154.799
1	5	9.27369	2.72872	2	188	168	258	168	177.274
1	5	69.8189	2.76882	1	263	283	213	263	152.819
1	5	3.13419	2.88577	3	228	268	238	238	54.8658
1	5	15.6294	2.81277	1	262	152	202	262	66.3706
1	5	76.9638	3.53043	2	181	171	121	171	67.9638
1	5	25.9094	2.32248	3	80	150	110	110	135.909
1	5	22.3048	3.36256	2	312	192	182	192	169.695
1	5	13.4181	2.12729	3	25	35	115	115	128.418
1	5	1.44033	7.27948	3	331	261	221	221	39.5597
1	5	15.373	2.92208	3	266	146	286	286	121.373
1	5	4	3.23384	3	159	119	49	49	45
1	5	51.3003	1.80761	2	98	188	238	188	59.3003
1	6	21.8476	1.62556	1	205	135	155	205	46.8476
1	6	14.8108	4.37178	2	249	239	159	239	73.8108
1	6	17.3194	2.36835	3	120	90	140	140	157.319
1	6	31	1.01329	2	209	239	279	239	90
1	6	65.8989	2.85107	2	186	306	266	306	60.1011
1	6	58.5388	4.11751	3	179	189	29	29	150.461
1	6	73.6193	5.00931	1	164	74	204	164	57.6193
1	6	41.9744	3.90668	3	126	216	196	196	154.026
1	6	28.1017	2.18632	2	227	207	247	207	178.898
1	6	17.9761	9.15146	1	141	121	81	141	123.024
1	6	8.0806	2.67971	3	172	142	272	272	100.081
1	6	68.6609	2.67055	1	171	331	261	171	102.339
1	6	4.65675	2.45724	1	235	205	215	235	59.6568
1	6	3.72631	2.352	2	224	314	214	314	137.726
1	6	32	2.64058	2	93	103	33	103	135
1	6	6.63095	2.51873	2	165	215	205	215	28.369
1	6	29.0892	3.56253	3	157	167	257	257	47.9108
1	6	84	0.839318	3	176	96	186	186	90
1	6	88.3808	2.36571	3	136	166	256	256	167.619
1	6	58.991	2.33025	1	70	120	190	70	128.991
1	6	16.8724	2.6744	3	287	197	327	327	163.872
1	6	36.7398	6.98939	1	143	113	213	143	106.26
1	6	18.9946	2.41035	3	111	121	231	231	32.0054
1	6	40.2189	3.49613	2	176	186	286	186	46.2189
1	6	50.5367	3.11548	3	74	124	104	104	154.537
1	6	39.3808	2.47934	1	198	298	208	198	57.3808
1	6	80.5793	5.21393	2	218	118	228	118	18.5793
1	6	50.5634	5.07554	2	287	127	227	127	177.563
1	6	17.2593	1.89434	1	223	153	173	223	25.7407
1	6	2.96376	2.88974	1	73	53	203	73	75.9638
2	1	14.6901	6.66648	2	209	109	169	109	123.69
2	1	72.0054	5.20047	2	15	95	45	95	167.005
2	1	38.3099	4.15051	3	48	168	18	18	56.3099
2	1	37.6375	6.62619	3	257	237	287	287	144.638
2	1	54.8151	6.348	2	144	284	304	284	49.1849
2	1	53.0948	5.78408	3	159	59	139	139	12.0948
2	1	12.75	3.69705	3	307	257	207	207	14.25
2	1	72.1755	6.52462	3	93	103	163	163	55.1755
2	1	1.01279	4.00028	3	62	22	182	182	3.01279
2	1	10.5651	11.7375	1	164	54	134	164	153.435
2	1	24.4349	5.34514	1	174	224	164	174	18.4349
2	1	9.50436	9.46932	2	237	277	167	277	106.504
2	1	42.9052	16.9119	1	125	175	185	125	167.905
2	1	25.5377	19.2789	1	190	210	180	190	35.5377
2	1	6.9321	4.12934	2	126	16	176	16	22.9321
2	1	89	3.62522	1	181	71	91	181	90
2	1	27	15.7232	2	292	252	262	252	45
2	1	11.751	9.47844	1	56	146	106	56	67.751
2	1	29.8014	13.3211	1	172	182	232	172	21.8014
2	1	40.3499	4.35647	1	167	17	177	167	27.3499
2	1	27.9638	8.58888	3	63	133	93	93	120.964
2	1	56.7098	16.0579	1	175	115	195	175	51.7098
2	1	6.8845	6.16806	2	102	212	112	212	38.8845
2	1	56.1986	5.94843	2	183	123	73	123	66.8014
2	1	9.49857	6.94501	3	244	184	284	284	113.499
2	1	17.4349	7.40496	3	141	171	181	181	18.4349
2	1	64.7803	4.75018	3	222	312	202	202	137.22
2	1	22.71	9.44274	1	42	142	82	42	19.29
2	1	2.45184	4.42434	2	141	221	211	221	43.4518
2	1	19.6107	3.10605	2	240	200	270	200	39.6107
2	2	76.1524	4.50862	1	327	257	157	327	43.1524
2	2	39	7.15631	1	186	246	116	186	45
2	2	16.3179	2.95677	1	185	225	175	185	21.3179
2	2	83.7652	6.74912	3	174	184	284	284	7.76517
2	2	23.1145	8.46904	3	299	249	349	349	145.886
2	2	67.5651	8.34372	2	309	319	219	319	26.5651
2	2	50.1342	5.46773	2	305	255	295	255	125.134
2	2	59.6028	5.48226	3	36	116	106	106	46.3972
2	2	9	5.44142	2	34	54	104	54	45
2	2	66.7352	7.19136	3	126	236	146	146	32.7352
2	2	6.56505	9.58057	2	170	200	120	200	26.5651
2	2	45.8658	19.6372	1	324	174	264	324	9.86581
2	2	0.61046	8.38219	3	132	222	152	152	151.39
2	2	12.9638	9.01519	1	162	22	132	162	149.036
2	2	33	13.4687	2	162	102	182	102	135
2	2	34.7462	6.30686	2	119	19	129	19	53.7462
2	2	56.8014	4.14635	1	100	140	60	100	156.801
2	2	18.4296	5.33457	1	212	172	82	212	13.5704
2	2	5.30861	14.6062	3	94	154	144	144	138.691
2	2	24.6598	13.0235	2	261	211	191	211	6.34019
2	2	2.71059	6.89717	3	83	73	183	183	5.71059
2	2	36.8014	4.16427	1	120	70	60	120	156.801
2	2	1.99202	4.16105	2	153	123	63	123	124.992
2	2	33.0169	14.4292	1	188	338	298	188	154.983
2	2	16.5348	4.34266	3	175	225	105	105	121.535
2	2	1.59229	6.83462	1	237	207	187	237	55.4077
2	2	0.0724869	7.72897	2	202	62	182	62	61.9275
2	2	12.8153	11.2808	3	45	55	185	185	172.185
2	2	79.5722	17.0956	3	84	174	254	254	174.428
2	2	5.94418	13.3704	2	156	186	106	186	11.9442
2	3	0.251896	10.3348	1	198	118	78	198	18.2519
2	3	32.8845	7.89451	3	164	244	264	264	51.1155
2	3	48.3099	4.46573	2	128	278	158	278	146.31
2	3	52.1572	6.27222	3	156	206	166	166	38.1572
2	3	25.2364	8.58707	1	159	239	139	159	4.23639
2	3	88.746	11.7681	1	85	205	235	85	173.746
2	3	29.7873	6.07646	2	261	131	281	131	160.787
2	3	52.8545	6.9752	3	223	183	283	283	155.854
2	3	42.7357	6.10415	1	94	234	154	94	136.736
2	3	28.5638	3.95135	1	109	179	209	109	137.564
2	3	42.9293	4.66412	2	114	104	194	104	146.929
2	3	43.3665	4.64639	3	215	85	95	95	138.366
2	3	23.9042	9.88917	1	211	101	121	211	54.9042
2	3	20.556	11.1599	3	240	290	270	270	69.444
2	3	13.0679	5.47994	3	64	74	54	54	67.0679
2	3	15	6.56711	2	330	300	200	300	135
2	3	30.8753	6.01139	1	86	116	96	86	55.1247
2	3	13.4688	5.74572	3	102	92	192	192	178.531
2	3	1.1301	8.21349	2	132	52	102	52	53.1301
2	3	26.008	13.0668	2	121	241	181	241	34.992
2	3	4.91438	6.15309	2	231	171	251	171	175.914
2	3	32.6156	12.1775	3	194	174	204	204	171.384
2	3	1.23639	3.13805	1	138	148	88	138	139.236
2	3	45.7495	5.03412	2	107	67	177	67	21.2505
2	3	28.029	2.92839	2	196	106	206	106	134.029
2	3	10.56	8.26418	1	150	170	210	150	160.56
2	3	20.8503	3.15869	3	158	98	48	48	27.1497
2	3	3.1301	6.73078	1	140	170	190	140	143.13
2	3	12.1572	4.35489	2	314	334	304	334	141.843
2	3	38.6341	5.71523	3	222	332	182	182	143.366
2	4	18.2176	9.40557	2	183	163	83	163	144.782
2	4	24.3407	4.3678	1	279	199	239	279	123.341
2	4	16.2564	6.29023	2	114	104	154	104	120.256
2	4	16.7144	7.4233	1	96	26	86	96	112.714
2	4	4.0546	9.82534	1	25	115	165	25	29.0546
2	4	75.7398	6.17111	3	338	178	268	268	163.74
2	4	0.746162	6.57559	3	113	163	53	53	53.7462
2	4	6.96376	3.89645	3	124	74	114	114	120.964
2	4	12.6422	7.44006	3	327	207	177	177	164.358
2	4	27.789	4.646	3	178	48	98	98	125.789
2	4	4.7343	3.64843	1	335	285	165	335	159.734
2	4	1.25533	5.69081	1	154	64	24	154	152.745
2	4	14.8532	10.5217	2	21	41	171	41	26.1468
2	4	5.50143	6.6133	3	219	319	299	299	113.499
2	4	15.9704	3.93884	3	193	203	93	93	108.97
2	4	24	5.93058	1	111	101	241	111	135
2	4	10.8208	7.60269	2	209	129	149	129	139.821
2	4	76.7263	8.27604	1	299	169	189	299	42.2737
2	4	24.8303	6.7986	1	339	289	229	339	134.17
2	4	18.9625	4.60805	2	105	275	195	275	113.962
2	4	13.6997	8.13738	1	163	183	153	163	149.3
2	4	18.4725	7.8048	3	171	301	201	201	39.4725
2	4	3.18429	6.75803	3	216	256	326	326	149.184
2	4	31.0725	4.86276	2	77	177	237	177	28.0725
2	4	16.7449	7.83729	2	117	167	37	167	150.255
2	4	1.3441	6.69927	3	144	244	154	154	155.344
2	4	49.7131	10.3585	2	169	39	29	39	169.287
2	4	66.0892	4.75061	2	54	204	184	204	137.911
2	4	60.0355	10.3146	1	246	176	156	246	5.96449
2	4	16.3099	6.65819	2	145	185	195	185	168.69
2	5	11.4703	5.00145	1	177	317	327	177	165.53
2	5	31.0856	8.41089	2	233	153	183	153	4.08562
2	5	2.87533	3.9367	2	272	212	222	212	34.8753
2	5	6.42687	3.58814	1	206	196	216	206	19.5731
2	5	2.17851	2.7932	3	159	249	239	239	56.8215
2	5	23.7995	12.2347	1	144	174	194	144	167.8
2	5	40.294	2.98483	1	291	301	161	291	151.294
2	5	16.1849	5.97783	3	127	257	237	237	40.8151
2	5	4.36646	14.9864	2	151	91	211	91	86.6335
2	5	43.9965	7.11933	3	315	205	235	235	11.0035
2	5	40.2894	4.39505	2	256	226	236	226	5.71059
2	5	19.047	4.49591	2	279	289	219	289	128.047
2	5	0.397438	5.85948	1	177	227	317	177	177.397
2	5	80.1448	5.28193	3	95	205	235	235	154.855
2	5	8.81508	3.289	1	238	348	188	238	49.1849
2	5	32.3844	3.13608	1	266	156	186	266	53.6156
2	5	83	10.6879	3	157	317	277	277	0
2	5	18.9949	5.64691	2	95	65	155	65	46.0051
2	5	33	4.98534	1	102	132	192	102	135
2	5	23.5651	4.09029	2	143	93	113	93	116.565
2	5	2.19859	3.48125	3	259	269	249	249	66.8014
2	5	6.68038	6.33653	3	156	216	186	186	12.6804
2	5	48.3099	3.66434	3	272	162	262	262	33.6901
2	5	14.5104	5.27095	1	17	67	107	17	2.48955
2	5	17.3803	5.96144	2	73	153	93	153	170.38
2	5	9.84031	2.93809	2	184	134	114	134	124.16
2	5	1.13419	4.02615	2	144	124	134	124	125.134
2	5	48.1094	6.17223	1	154	44	114	154	22.1094
2	5	38.0255	2.7684	3	280	230	300	300	158.025
2	5	1.10945	4.73349	3	189	89	159	159	157.891
2	6	41.1597	7.28424	2	243	173	83	173	34.1597
2	6	14.5973	6.09125	3	13	123	103	103	117.597
2	6	22.2544	4.7943	2	204	164	214	164	141.746
2	6	9.02387	8.29535	3	54	64	204	204	33.0239
2	6	15.9591	8.0904	2	13	153	163	153	168.959
2	6	33.0608	9.30124	3	111	261	101	101	134.061
2	6	3.74616	11.5439	2	210	230	280	230	53.7462
2	6	6.35583	6.30014	1	181	171	51	181	174.644
2	6	23.2413	4.39937	1	138	228	248	138	161.241
2	6	29.8753	6.21697	3	25	65	95	95	124.875
2	6	17.1786	12.9663	1	236	176	266	236	73.1786
2	6	31.8699	3.41853	1	40	120	90	40	8.1301
2	6	35.2243	4.89688	3	217	127	107	107	142.224
2	6	60.9052	7.38769	1	253	243	173	253	12.0948
2	6	46.5651	3.99245	1	200	180	230	200	153.435
2	6	18.5241	5.01372	2	123	93	233	93	74.4759
2	6	10.9816	12.2916	2	151	221	181	221	30.0184
2	6	28.6013	8.30251	1	78	148	48	78	49.3987
2	6	9.60129	5.34514	2	169	239	159	239	49.3987
2	6	8.14098	11.6775	2	238	218	188	218	29.859
2	6	14.8069	6.27968	3	251	271	301	301	135.807
2	6	12.1582	3.70682	3	136	206	246	246	53.8418
2	6	81.9872	4.46624	1	85	35	135	85	3.01279
2	6	6.72951	4.8088	3	165	235	125	125	131.73
2	6	5.30485	3.25823	3	170	230	140	140	145.305
2	6	10.6197	6.36081	3	95	175	225	225	55.6197
2	6	12.6197	3.53737	2	102	2	42	2	169.38
2	6	26.2249	5.5694	1	219	329	229	219	65.2249
2	6	39.1301	9.21439	1	256	126	246	256	36.8699
2	6	19.8534	3.45114	2	229	109	89	109	128.853
3	1	21.6199	4.60634	3	266	176	316	316	157.62
3	1	52.0131	4.99483	1	88	48	78	88	140.013
3	1	31.8068	30.2	3	192	162	112	112	143.807
3	1	2.31121	3.21605	2	107	147	117	147	144.689
3	1	21.875	2.89377	2	206	196	186	196	37.875
3	1	28	7.55339	3	212	112	242	242	90
3	1	59.9946	5.47824	2	302	272	172	272	32.0054
3	1	88.3179	3.55242	1	203	153	113	203	111.318
3	1	6.23117	2.90519	2	229	139	69	139	132.769
3	1	20.7757	3.81732	2	133	163	223	163	142.224
3	1	4.76617	2.51057	2	37	137	107	137	141.766
3	1	61.6105	2.62185	1	147	37	187	147	28.6105
3	1	14.4349	2.09607	3	259	189	319	319	153.435
3	1	2.85521	1.80745	1	197	227	137	197	19.8552
3	1	4.64225	3.5214	3	196	56	146	146	150.642
3	1	6.93142	3.34896	3	92	132	172	172	165.069
3	1	5.2361	8.665	3	89	99	39	39	44.2361
3	1	30.4403	3.06363	2	215	65	105	65	95.4403
3	1	31.4099	1.51829	1	259	309	199	259	110.41
3	1	25.3008	5.41819	3	193	123	183	183	28.3008
3	1	4.98311	2.76781	1	30	160	90	30	25.0169
3	1	14.0395	3.45257	1	130	170	60	130	144.039
3	1	30.56	3.1512	2	5	85	125	85	115.56
3	1	26.2996	3.23197	1	179	279	239	179	152.7
3	1	66.5024	2.78517	2	133	223	193	223	109.502
3	1	16.1446	4.11449	3	167	177	237	237	40.8554
3	1	26.751	5.08206	1	119	169	199	119	145.751
3	1	9.52881	4.60094	3	287	257	177	177	167.471
3	1	1	1.85039	2	69	89	209	89	90
3	1	32	2.12493	1	58	168	18	58	90
3	2	5.83365	2.53093	3	237	97	107	107	112.834
3	2	2.72697	2.61122	3	181	211	221	221	43.727
3	2	1.73211	2.72887	1	141	191	211	141	139.268
3	2	25.1414	3.07305	3	135	225	265	265	59.8586
3	2	11.1726	1.93182	1	178	188	98	178	166.827
3	2	37.5345	2.68392	3	118	188	158	158	120.466
3	2	48.9097	2.07063	2	57	77	187	77	125.91
3	2	18.6075	3.04981	3	137	167	77	77	58.3925
3	2	52.0548	1.7082	1	259	289	239	259	131.055
3	2	18.6335	1.80379	3	273	253	293	293	131.634
3	2	4.44293	2.32553	2	104	204	44	204	28.4429
3	2	66.7757	2.51315	1	241	261	221	241	127.776
3	2	16.8699	3.60874	2	150	200	220	200	36.8699
3	2	28.1449	2.66624	2	204	164	54	164	135.855
3	2	14.2744	4.10506	3	30	150	10	10	24.2744
3	2	53.5651	2.98443	2	253	243	273	243	116.565
3	2	41.6764	2.68143	1	186	146	266	186	144.324
3	2	16.0131	3.05663	1	146	276	246	146	129.987
3	2	18.2643	4.17527	3	315	305	245	245	46.7357
3	2	3.18921	2.56034	2	82	212	222	212	28.8108
3	2	22.0425	2.16077	2	135	165	65	165	142.958
3	2	12.8014	2.03326	2	129	99	49	99	111.801
3	2	1.29304	3.28727	3	95	155	105	105	103.707
3	2	21.71	2.39067	1	139	79	159	139	160.71
3	2	21.5085	3.63603	1	77	217	127	77	55.4915
3	2	13.4314	4.29801	2	199	309	179	309	142.431
3	2	24	2.91725	1	111	241	151	111	135
3	2	57.3575	2.96121	2	115	195	95	195	137.643
3	2	32.7603	3.45778	1	81	51	171	81	48.2397
3	2	15.29	2.26433	3	314	284	184	184	19.29
3	3	51.9092	2.83911	1	185	285	255	185	133.091
3	3	7.30028	2.20523	1	218	208	138	218	30.6997
3	3	28.45	2.96671	2	59	119	199	119	147.45
3	3	15.0054	3.73148	3	297	327	287	287	122.005
3	3	3.58049	3.55546	2	119	219	89	219	42.5805
3	3	16.8387	2.70798	1	187	157	57	187	23.8387
3	3	13.5651	2.94743	1	193	123	153	193	26.5651
3	3	41.5993	2.70389	1	9	179	109	9	50.5993
3	3	18.2072	1.82348	3	51	81	111	111	129.207
3	3	27.6861	3.50573	1	181	61	101	181	28.6861
3	3	4.55	2.39302	2	212	152	122	152	147.45
3	3	43	4.08611	2	48	178	88	178	135
3	3	16.9697	3.61354	2	262	192	312	192	175.03
3	3	19.0906	2.33121	3	195	125	155	155	135.909
3	3	82.1844	3.06714	1	230	290	330	230	132.184
3	3	14.337	2.16958	1	208	198	268	208	42.337
3	3	8.53768	6.78258	3	227	237	117	117	125.538
3	3	38.2559	2.8833	3	246	236	186	186	44.2559
3	3	7.30138	2.54627	3	212	122	162	162	154.699
3	3	19.8887	2.09474	3	252	232	262	262	101.889
3	3	18.2602	2.7778	3	227	127	137	137	118.74
3	3	1.93953	2.41947	2	170	160	100	160	161.94
3	3	32.1623	2.12892	2	192	112	182	112	144.162
3	3	2.99646	1.72864	3	96	196	166	166	168.996
3	3	35.0919	3.20899	2	178	158	208	158	13.0919
3	3	2.66778	2.25838	2	266	176	156	176	178.668
3	3	57.6769	1.82506	1	33	63	103	33	155.323
3	3	30.4518	2.64333	1	193	313	323	193	43.4518
3	3	23.1301	2.44936	3	180	250	300	300	143.13
3	3	46.7462	2.02768	2	117	97	127	97	143.746
3	4	15.029	6.14796	1	331	241	251	331	135.971
3	4	25.3895	6.64118	2	294	234	194	234	28.6105
3	4	0.00917671	3.07514	2	82	152	192	152	151.991
3	4	24.5792	2.84601	2	224	174	264	174	149.421
3	4	3.1301	2.21673	1	40	120	80	40	36.8699
3	4	10.4986	2.70247	3	242	262	212	212	21.5014
3	4	27.3027	2.22583	2	162	222	142	222	14.6973
3	4	5.99082	4.73968	3	186	86	146	146	151.991
3	4	0.565051	2.936	3	84	144	154	154	153.435
3	4	55.0686	5.21622	3	100	60	110	110	165.069
3	4	8	2.56586	1	217	247	147	217	45
3	4	23.9761	4.51448	2	117	237	217	237	33.0239
3	4	15.4633	4.59396	3	155	85	215	215	19.5367
3	4	15.7436	2.91099	2	66	46	216	46	30.2564
3	4	9	1.33478	3	89	159	99	99	90
3	4	11.3139	3.05484	3	305	285	185	185	16.3139
3	4	9.0513	2.62529	1	166	276	176	166	156.949
3	4	26.2553	5.20332	3	234	144	224	224	17.7447
3	4	4.96249	3.30076	1	206	176	226	206	21.0375
3	4	26.4181	3.77598	2	38	78	148	78	51.5819
3	4	33.6215	3.87289	1	195	165	235	195	48.6215
3	4	3.9454	1.7957	1	168	98	58	168	164.055
3	4	8.61406	1.95308	2	156	56	126	56	47.3859
3	4	54.1931	1.73761	1	190	300	210	190	135.807
3	4	19.8059	3.11387	2	314	184	284	184	23.8059
3	4	59.1113	2.85736	3	149	189	109	109	168.111
3	4	21.0296	2.1678	3	150	190	140	140	161.03
3	4	20.4349	2.43687	1	313	303	283	313	153.435
3	4	33.9638	1.83503	2	104	124	194	124	157.964
3	4	10.3103	3.93716	1	227	247	327	227	36.6897
3	5	9.65065	3.23944	3	203	323	313	313	142.651
3	5	2.20011	3.19002	1	156	66	186	156	153.8
3	5	22.9245	2.10711	1	133	93	143	133	155.925
3	5	28.9465	2.17083	1	125	75	175	125	153.947
3	5	57.4208	3.63975	2	312	272	192	272	149.421
3	5	30.2648	2.10978	2	217	117	127	117	147.265
3	5	6.66778	2.73731	3	113	213	233	233	46.3322
3	5	2.28941	4.69747	3	207	87	217	217	39.2894
3	5	4.09476	2.40511	3	183	153	143	143	147.095
3	5	21.5377	5.12622	3	184	254	194	194	35.5377
3	5	10.8014	3.52219	2	141	11	131	11	21.8014
3	5	37.1859	1.99002	2	134	274	184	274	131.186
3	5	24.6192	2.60342	1	82	222	72	82	57.3808
3	5	55.6071	3.76468	3	239	159	109	109	53.3929
3	5	11.7751	3.35354	3	233	253	193	193	24.7751
3	5	23.1301	2.07396	1	240	230	280	240	36.8699
3	5	16.5651	2.5407	2	160	170	260	170	153.435
3	5	22.875	1.57717	1	330	170	260	330	172.875
3	5	2.61966	1.96241	3	123	243	143	143	145.62
3	5	41.0685	5.25891	1	26	106	116	26	164.932
3	5	68.4794	2.40116	2	206	46	186	46	157.521
3	5	7.76364	3.59486	3	112	192	222	222	49.7636
3	5	18	2.73608	2	233	243	203	243	45
3	5	28.3099	2.71996	2	242	332	282	332	123.69
3	5	17.2176	1.65999	1	162	112	142	162	144.782
3	5	47.0239	2.90694	3	184	64	194	194	146.976
3	5	20.5482	1.94607	1	116	136	176	116	136.548
3	5	8.85032	3.65441	1	216	326	236	216	27.1497
3	5	17.5704	4.16909	2	29	49	69	49	31.4296
3	5	0.431408	1.86172	2	272	142	132	142	142.431
3	6	14.1859	5.91332	1	117	217	247	117	131.186
3	6	26.144	4.1525	2	313	283	303	283	129.144
3	6	27.3391	3.04132	3	170	200	240	240	32.6609
3	6	7.43495	2.10339	1	146	186	76	146	153.435
3	6	80.1376	3.40282	3	148	168	128	128	47.8624
3	6	72.1094	2.98033	1	95	185	105	95	22.8906
3	6	9.97654	4.17301	3	186	206	66	66	56.0235
3	6	10.2564	2.46597	2	90	160	150	160	149.744
3	6	12.8241	2.8407	1	255	235	195	255	62.1759
3	6	15.7462	2.74257	3	198	158	128	128	143.746
3	6	47.5104	3.06717	1	185	115	205	185	137.49
3	6	78.1027	3.28988	2	244	164	264	164	62.1027
3	6	15.2602	4.98497	3	329	339	269	269	73.7398
3	6	29.1785	2.46586	1	86	36	66	86	56.8215
3	6	22.8767	2.25637	2	151	201	81	201	43.8767
3	6	35.6193	2.27497	1	68	48	128	68	32.3807
3	6	21.9638	1.95779	1	171	241	201	171	149.036
3	6	32.0091	2.77013	2	61	171	51	171	138.991
3	6	32.5924	2.95089	3	235	95	255	255	107.592
3	6	13.4349	3.09535	1	40	110	60	40	26.5651
3	6	12.0892	2.1308	2	220	120	100	120	132.089
3	6	56.992	2.42701	2	253	293	193	293	169.992
3	6	3.1416	3.7648	3	155	215	245	245	61.8584
3	6	23.2643	3.14555	2	40	110	70	110	133.264
3	6	47.8753	2.54179	2	67	77	217	77	124.875
3	6	3.69007	2.67389	3	240	250	150	150	146.31
3	6	25.2602	3.84502	3	284	154	234	234	28.7398
3	6	4.52382	1.67951	3	182	302	312	312	127.476
3	6	59.3462	2.69035	1	101	161	191	101	160.346
3	6	56.2364	2.93752	2	194	164	24	164	40.2364
4	1	24.3048	7.59318	1	301	211	261	301	145.305
4	1	2.81407	5.8615	1	91	101	191	91	93.8141
4	1	18.6013	3.9318	1	202	282	272	202	40.6013
4	1	24.3402	4.46799	3	313	323	243	243	38.6598
4	1	16.7751	4.4266	3	108	148	188	188	24.7751
4	1	19.6105	3.22835	1	189	209	49	189	28.6105
4	1	29.1009	4.12204	3	91	41	101	101	130.101
4	1	3.60256	4.05379	3	129	119	89	89	92.6026
4	1	8.43495	2.93658	2	165	145	225	145	153.435
4	1	20.4429	3.63218	1	172	292	262	172	151.557
4	1	15.4349	4.18619	1	93	113	63	93	108.435
4	1	8.71059	4.78709	2	173	183	223	183	174.289
4	1	0.869898	1.89225	2	244	234	144	234	53.1301
4	1	4.35899	3.6035	3	270	130	120	120	115.641
4	1	7.00798	3.70926	1	228	118	258	228	55.008
4	1	77.4703	3.68442	1	153	83	163	153	75.5297
4	1	1.82149	5.7318	2	75	215	205	215	33.1785
4	1	0.12213	3.6917	1	132	92	142	132	131.878
4	1	20.9949	3.05874	2	173	293	223	293	133.995
4	1	2.5448	4.42542	1	90	200	110	90	87.4552
4	1	20.4965	4.62739	2	171	201	261	201	41.4965
4	1	12.5014	3.141	3	114	184	144	144	156.501
4	1	21.9807	5.1613	3	166	26	56	56	34.0193
4	1	2.61565	4.08186	2	119	219	199	219	36.3844
4	1	3.43899	3.41699	3	139	249	149	149	145.561
4	1	2	2.50269	3	308	248	268	268	90
4	1	8.14554	3.77842	2	44	164	214	164	155.854
4	1	4	2.39922	3	176	186	86	86	90
4	1	34	5.00071	2	241	101	161	101	135
4	1	8.96376	3.81816	2	168	158	48	158	149.036
4	2	23.992	5.26548	2	141	191	81	191	34.992
4	2	30.3859	2.88851	2	147	287	157	287	137.386
4	2	13.4349	3.52719	2	60	50	100	50	63.4349
4	2	1.21759	3.6471	1	214	54	74	214	35.2176
4	2	13.71	2.32952	3	167	247	237	237	70.71
4	2	5.38034	3.39341	1	241	251	161	241	55.6197
4	2	6.59242	3.92692	1	146	196	66	146	152.592
4	2	12.9697	3.18231	1	323	273	213	323	130.03
4	2	3.03624	2.81535	2	266	236	146	236	59.0362
4	2	15.6952	3.76513	3	239	309	199	199	34.6952
4	2	13.5043	2.77757	2	248	288	308	288	121.504
4	2	8.88553	3.83471	2	208	178	198	178	169.114
4	2	14.1986	2.22493	3	271	171	261	261	66.8014
4	2	0.185925	2.81093	3	254	334	274	274	93.8141
4	2	33.9275	8.91633	2	178	118	98	118	151.928
4	2	4.57633	3.35211	1	179	339	329	179	3.57633
4	2	5.52881	1.72864	1	263	283	183	263	77.4712
4	2	87	3.42461	2	132	222	182	222	135
4	2	0.508523	2.7624	1	236	156	256	236	55.4915
4	2	12.2364	3.97527	3	187	107	197	197	4.76364
4	2	26.9872	2.82453	3	295	175	255	255	48.0128
4	2	14	2.62617	3	91	161	31	31	45
4	2	0.471192	3.4761	3	117	147	167	167	167.471
4	2	1.99091	4.04701	1	137	267	247	137	138.991
4	2	31.125	4.82511	2	211	111	161	111	142.125
4	2	0.690068	4.25917	3	73	143	213	213	33.6901
4	2	3.14669	5.06584	1	169	49	149	169	172.147
4	2	4.49586	2.51235	3	287	147	267	267	82.5041
4	2	10	2.98441	1	215	65	75	215	45
4	2	15.4472	4.98505	2	43	133	93	133	117.553
4	3	5.92792	3.4707	2	168	78	158	78	72.0721
4	3	0.815025	5.5617	1	122	222	152	122	121.185
4	3	0.0902769	3.31436	3	304	164	324	324	144.09
4	3	31.2364	4.24169	3	238	168	288	288	139.236
4	3	8.8637	4.48787	2	234	254	324	254	65.1363
4	3	12.1811	4.15881	3	235	105	255	255	62.8189
4	3	1.15239	5.52745	2	293	273	233	273	91.8476
4	3	55.9987	4.58328	3	268	178	198	198	142.001
4	3	35.5704	6.3363	1	67	87	57	67	31.4296
4	3	4	2.4323	2	264	274	254	274	90
4	3	0.899092	3.77823	1	184	304	264	184	4.89909
4	3	31.5679	3.93914	1	147	207	157	147	178.568
4	3	3.72631	5.08732	2	146	226	126	226	42.2737
4	3	6.47943	3.23047	1	151	211	231	151	157.479
4	3	2.23639	4.50429	1	137	197	157	137	139.236
4	3	3.21009	4.12782	1	220	310	200	220	43.2101
4	3	41.0725	3.43188	2	203	103	143	103	61.9275
4	3	48	2.16174	3	72	162	42	42	90
4	3	29.844	4.47435	3	300	270	200	200	49.844
4	3	23.6938	3.36514	3	286	186	226	226	22.3062
4	3	3.96376	4.25807	1	198	208	328	198	14.0362
4	3	15.4261	2.80054	3	145	35	115	115	130.426
4	3	16.866	3.55409	2	265	255	145	255	58.134
4	3	4	2.85849	3	214	314	274	274	90
4	3	20.4237	2.94507	1	249	199	279	249	48.5763
4	3	7.67131	3.80562	3	214	224	174	174	166.329
4	3	26.373	4.52697	2	175	95	115	95	121.373
4	3	16.0906	3.93065	2	148	208	198	208	44.0906
4	3	18.1022	4.50665	1	174	214	154	174	155.898
4	3	45.8533	4.81822	2	147	97	177	97	142.853
4	4	31.5367	2.94979	3	188	288	258	258	109.537
4	4	9.09062	3.24543	3	315	175	305	305	134.091
4	4	13.2348	4.25462	2	154	24	34	24	37.2348
4	4	13.1193	4.57582	1	113	213	183	113	126.119
4	4	8.40988	2.90037	3	122	62	102	102	110.41
4	4	26.3493	3.5203	3	241	271	191	191	37.3493
4	4	2.47589	2.83642	3	153	253	243	243	60.5241
4	4	10.2532	3.7141	2	132	222	122	222	52.2532
4	4	4.43283	5.03374	1	209	219	149	209	24.5672
4	4	11.0113	3.1716	1	191	101	111	191	22.0113
4	4	1.18593	4.42437	2	170	130	230	130	131.186
4	4	13.7723	5.87417	1	142	152	122	142	155.772
4	4	3	1.67677	2	213	273	193	273	90
4	4	4.21759	5.03628	3	71	61	211	211	35.2176
4	4	7.00538	2.24601	2	205	115	85	115	122.005
4	4	33.5288	6.03234	1	24	154	174	24	57.5288
4	4	2.65891	2.6823	3	277	177	297	297	114.341
4	4	16.0892	5.50551	3	176	256	206	206	42.0892
4	4	8.53768	3.49693	1	297	267	307	297	125.538
4	4	16.3062	2.70827	1	276	126	246	276	112.306
4	4	11.3407	6.02785	2	282	202	292	202	33.3407
4	4	15.049	3.51762	2	174	224	114	224	28.951
4	4	28.7106	3.2335	2	118	158	178	158	129.289
4	4	19.8534	2.29555	2	179	289	299	289	128.853
4	4	3	1.94285	1	273	203	243	273	90
4	4	3.30053	6.33917	3	209	319	329	329	152.301
4	4	19.8973	2.69113	1	127	87	197	127	107.103
4	4	2.53918	2.99429	2	222	172	312	172	169.461
4	4	40.5377	5.04741	1	230	270	290	230	9.46232
4	4	17.0836	3.73771	3	108	208	188	188	25.0836
4	5	14.951	6.79226	2	214	194	284	194	28.951
4	5	15.6952	6.24607	1	199	69	109	199	34.6952
4	5	12.7824	3.11202	1	132	292	202	132	144.782
4	5	16.4275	3.52797	3	63	93	193	193	29.4275
4	5	8.53462	3.87965	3	73	123	183	183	11.5346
4	5	35.5923	7.44264	3	256	176	226	226	10.4077
4	5	9.56101	5.12872	3	114	184	44	44	34.439
4	5	9.97439	5.04075	2	124	164	184	164	154.026
4	5	1.61966	3.18273	2	206	216	116	216	34.3803
4	5	25.179	3.44781	3	199	179	129	129	154.179
4	5	10.1572	2.89811	1	298	318	188	298	128.157
4	5	26.9697	3.62951	2	153	293	283	293	139.97
4	5	1.07536	4.11149	1	250	260	120	250	71.0754
4	5	2.28256	5.54293	1	162	172	12	162	159.717
4	5	11.6507	7.17107	3	241	231	221	221	52.6507
4	5	3	1.56816	1	273	213	293	273	90
4	5	16.5923	2.96431	2	218	288	258	288	124.592
4	5	14.875	2.5376	2	213	113	203	113	127.875
4	5	8.10273	2.96153	1	99	219	109	99	107.103
4	5	8.97613	6.29005	3	237	117	177	177	168.024
4	5	1.38594	6.2809	1	181	251	201	181	2.38594
4	5	21.0548	2.76804	3	220	170	70	70	48.9452
4	5	17.5388	2.50883	2	52	102	132	102	119.539
4	5	18.6952	3.46813	2	96	196	136	196	34.6952
4	5	17.3948	4.331	2	112	72	32	72	54.6052
4	5	15.3556	3.95471	1	82	212	52	82	66.6444
4	5	2.43495	4.46718	3	84	224	164	164	161.565
4	5	8.52754	4.27381	3	277	207	177	177	5.52754
4	5	3.76933	3.90106	1	67	87	107	67	70.7693
4	5	0.854237	6.29986	2	308	178	278	178	178.854
4	6	17.3578	3.21856	3	208	148	168	168	150.642
4	6	8.59934	2.75236	3	152	232	132	132	140.599
4	6	20.9749	4.92881	2	274	154	144	154	133.025
4	6	4.23383	3.3208	1	56	216	176	56	51.7662
4	6	0.194429	4.78865	1	185	135	175	185	5.19443
4	6	7.71059	3.51374	2	257	137	127	137	129.289
4	6	12.1497	3.81707	3	85	25	75	75	62.8503
4	6	23	5.34306	2	332	202	292	202	45
4	6	11.124	3.21932	1	86	176	166	86	74.876
4	6	1.8699	5.04885	1	325	265	195	325	143.13
4	6	5.61069	2.40333	2	184	304	224	304	129.611
4	6	10.3141	3.03665	1	120	70	40	120	130.314
4	6	3.65929	2.5467	2	187	217	147	217	33.3407
4	6	8.61924	5.16728	3	116	226	156	156	147.381
4	6	88.0013	4.98791	3	214	64	144	144	52.0013
4	6	13.9061	2.42508	3	97	37	127	127	140.906
4	6	24.8845	3.17104	1	104	134	114	104	128.884
4	6	40.6156	4.95151	2	313	193	253	193	53.6156
4	6	2.96052	3.9682	1	192	132	262	192	9.03948
4	6	6.56505	2.92468	3	175	205	155	155	161.565
4	6	3.63754	4.93718	1	141	111	231	141	144.638
4	6	18.8551	5.53287	2	133	63	143	63	44.1449
4	6	19.1523	2.46024	1	283	333	313	283	122.152
4	6	4.01689	4.17113	2	71	111	171	111	115.017
4	6	0.880659	3.67159	2	157	217	147	217	36.1193
4	6	10.0888	6.01049	2	218	208	138	208	38.0888
4	6	13.3558	4.35203	3	303	203	233	233	39.6442
4	6	6.52411	2.34457	3	261	231	171	171	164.476
4	6	13	3.01298	1	122	222	132	122	135
4	6	9.09189	6.48256	3	164	304	184	184	13.0919
5	1	20.7989	2.21884	2	234	224	194	224	64.7989
5	1	76.607	2.5537	3	145	45	165	165	61.607
5	1	61.9081	2.4078	1	195	165	255	195	76.9081
5	1	1.76079	2.47153	3	248	278	258	258	76.2392
5	1	9.72556	2.61044	1	236	306	156	236	65.7256
5	1	10.3099	3.30384	3	114	124	134	134	123.69
5	1	15.29	2.55173	2	174	274	164	274	109.29
5	1	11.8014	2.63223	3	295	315	215	215	23.1986
5	1	4.88314	2.45039	1	228	218	138	228	52.8831
5	1	12.1193	2.67672	3	266	316	246	246	53.8807
5	1	3.99091	3.47958	2	235	225	205	225	41.0091
5	1	13.2559	2.42639	1	121	161	231	121	134.256
5	1	15.0205	3.10852	2	82	92	252	92	107.021
5	1	3.19443	3.40373	2	147	227	197	227	50.1944
5	1	29.9887	2.28519	1	142	52	182	142	112.011
5	1	2.92643	2.58057	3	274	254	244	244	61.0736
5	1	6.64417	2.59752	2	243	303	163	303	129.644
5	1	13.3008	2.35494	1	120	130	230	120	106.699
5	1	8.37913	3.94745	1	67	57	167	67	75.3791
5	1	13.7468	3.10361	3	44	154	204	204	37.7468
5	1	47.125	2.02321	2	55	75	205	75	122.125
5	1	2.9454	2.7694	3	293	183	283	283	105.945
5	1	12.1301	3.26212	2	169	139	279	139	126.87
5	1	25.359	2.93256	3	196	216	96	96	70.641
5	1	22.1301	2.33263	2	231	211	261	211	53.1301
5	1	14.5651	2.95689	3	218	308	258	258	63.4349
5	1	25.1572	3.30102	2	157	77	27	77	51.8428
5	1	49.2249	2.92873	1	196	116	226	196	65.2249
5	1	17.9638	2.28065	1	58	28	168	58	75.9638
5	1	14.6955	2.08783	1	96	156	86	96	110.695
5	2	35.7462	2.59612	1	243	253	313	243	98.7462
5	2	24.3194	3.29728	3	227	177	147	147	122.681
5	2	18.373	3.08843	3	262	142	302	302	103.627
5	2	24.3048	2.14416	3	1	61	31	31	55.3048
5	2	5.49914	1.99643	3	18	108	158	158	152.501
5	2	72.0054	2.58555	1	50	110	20	50	122.005
5	2	51.9638	3.39461	3	219	259	249	249	120.964
5	2	14.2035	1.968	3	158	178	278	278	112.203
5	2	65.0535	4.18064	2	201	231	281	231	116.053
5	2	16.4623	2.64555	2	262	142	242	142	125.538
5	2	27.6849	2.67179	3	102	152	242	242	34.3151
5	2	77.1301	2.88284	2	116	156	56	156	53.1301
5	2	0.571307	1.85001	3	209	219	249	249	68.4287
5	2	80.4677	3.01238	3	149	209	219	219	138.532
5	2	9.4321	1.68224	1	323	293	263	323	133.568
5	2	27.2338	2.58532	2	199	259	169	259	51.7662
5	2	78.556	2.49834	1	212	262	192	212	110.556
5	2	15.2564	2.27785	1	165	305	185	165	149.744
5	2	15.0362	2.82459	1	91	261	221	91	75.9638
5	2	1.44719	2.75805	2	114	74	94	74	72.5528
5	2	9.09386	3.51101	2	90	120	50	120	129.094
5	2	16.4349	3.22247	2	23	133	53	133	116.565
5	2	45.0809	3.29633	1	224	164	294	224	178.919
5	2	54.7655	2.86754	1	164	44	134	164	38.7655
5	2	79.8141	3.07431	1	149	209	229	149	48.8141
5	2	66.6335	3.58131	2	195	205	315	205	138.366
5	2	32.3524	2.2862	2	40	20	80	20	52.3524
5	2	0.699723	2.5495	2	180	150	190	150	149.3
5	2	47.4349	2.63342	1	209	199	279	209	161.565
5	2	16.0975	1.78395	3	119	209	219	219	55.0975
5	3	45.5651	3.29524	3	269	169	199	199	153.435
5	3	11.0296	2.13083	2	65	105	75	105	116.03
5	3	87.9269	2.49868	1	215	265	205	215	127.073
5	3	14.8767	2.42224	1	241	191	291	241	46.1233
5	3	23.125	1.94429	1	164	174	124	164	7.12502
5	3	0.34109	2.02851	3	316	246	156	156	155.659
5	3	14.1755	2.01461	1	131	201	101	131	145.176
5	3	12.7251	2.18808	1	224	234	334	224	56.7251
5	3	64.3785	2.2895	2	233	203	113	203	138.621
5	3	6.71312	3.36882	3	316	166	176	176	169.287
5	3	32.326	1.98155	2	332	282	322	282	134.326
5	3	37.4349	2.56222	3	79	169	199	199	161.565
5	3	1.74356	2.33074	3	213	133	193	193	14.7436
5	3	18.354	2.235	3	74	114	134	134	152.354
5	3	6.0755	2.60105	3	107	167	207	207	20.9245
5	3	39.1986	4.26652	2	11	61	161	61	21.8014
5	3	20.7595	2.08918	2	306	326	256	326	166.759
5	3	14.2101	3.41989	3	134	144	164	164	178.21
5	3	65.5206	4.50584	1	223	103	203	223	157.479
5	3	30.8014	2.3134	3	199	249	99	99	68.1986
5	3	15.5297	2.18499	3	185	145	195	195	30.5297
5	3	1.06069	2.63406	1	189	169	139	189	10.0607
5	3	18.2724	2.44015	2	147	287	257	287	125.272
5	3	15.8069	2.87034	2	240	150	270	150	134.193
5	3	84.789	1.96893	2	169	139	199	139	54.211
5	3	53.5713	1.72621	1	122	212	172	122	68.4287
5	3	1.61149	2.08203	1	235	195	205	235	56.6115
5	3	51.6952	2.13684	2	192	152	122	152	100.305
5	3	11.0115	2.60118	2	159	179	29	179	167.989
5	3	38.5686	2.25858	1	89	189	119	89	127.569
5	4	12.9494	2.52686	1	50	80	150	50	62.9494
5	4	77.5907	2.67512	3	238	198	148	148	45.5907
5	4	44.3487	2.46249	1	59	169	129	59	103.349
5	4	6.43495	2.73296	1	192	212	182	192	18.4349
5	4	9.844	3.109	1	220	230	260	220	49.844
5	4	36.125	2.86108	2	156	266	96	266	122.125
5	4	24.9454	1.95523	2	264	144	174	144	119.055
5	4	6.74616	2.29974	2	87	47	77	47	53.7462
5	4	21.4768	2.20726	1	170	230	250	170	148.523
5	4	6.74616	3.26476	1	178	148	158	178	171.254
5	4	25.2161	2.1917	2	192	272	122	272	117.216
5	4	15.9264	2.55635	2	127	167	237	167	151.074
5	4	32.6598	2.56504	2	31	141	181	141	173.66
5	4	6.15761	2.11393	3	161	61	31	31	24.8424
5	4	2.25384	2.5456	3	261	201	191	191	8.74616
5	4	0.0693179	2.11783	3	93	73	13	13	13.0693
5	4	10.7026	1.76971	3	293	213	283	283	113.703
5	4	12.1755	2.12645	3	183	173	133	133	145.176
5	4	26.0459	2.45828	1	217	107	247	217	10.9541
5	4	4.48617	2.01702	2	246	196	206	196	11.5138
5	4	1.29016	2.79074	3	192	32	172	172	173.29
5	4	60.4349	1.57211	1	183	73	153	183	63.4349
5	4	34.2364	2.62461	3	34	64	174	174	139.764
5	4	79.0736	2.85059	3	62	132	72	72	151.074
5	4	35.4472	1.81316	1	153	103	173	153	117.553
5	4	62.4222	1.9151	1	178	68	158	178	60.4222
5	4	0.847705	2.21432	2	218	348	288	348	167.152
5	4	17.3099	2.12386	2	321	231	251	231	33.6901
5	4	38.2338	2.01644	2	240	270	210	270	128.234
5	4	7.50852	1.77368	3	93	143	153	153	145.491
5	5	5.28941	1.74046	3	44	114	124	124	129.289
5	5	20.5348	1.67269	2	99	79	39	79	58.4652
5	5	16.4794	3.05979	2	221	231	281	231	67.4794
5	5	21.5634	2.37848	1	24	34	64	24	2.43665
5	5	54.6507	1.96394	2	308	268	318	268	142.651
5	5	36.0454	1.92841	1	169	109	39	169	132.955
5	5	56.7026	2.66446	1	258	198	178	258	21.2974
5	5	60.5226	3.35808	3	211	141	201	201	140.477
5	5	7.55281	1.86329	1	250	210	260	250	62.4472
5	5	36.7106	3.24634	3	179	109	59	59	95.7106
5	5	12.2643	2.28068	1	149	69	59	149	136.736
5	5	36.2161	2.9679	3	191	231	261	261	117.216
5	5	39.1755	3.44458	3	41	51	151	151	10.1755
5	5	23.8108	2.84648	2	135	175	85	175	151.189
5	5	19.8973	2.40894	3	43	103	143	143	162.897
5	5	10.0092	2.19421	3	42	152	162	162	151.991
5	5	8.53077	1.82379	3	120	190	90	90	98.5308
5	5	78.9314	2.86581	1	154	94	214	154	75.0686
5	5	86.8779	3.07604	1	225	275	235	225	138.122
5	5	85.6938	2.239	3	178	168	198	198	112.306
5	5	22.4608	2.40524	1	147	167	157	147	169.461
5	5	12.7449	2.93442	3	227	117	107	107	119.745
5	5	7.69947	1.65475	1	250	230	270	250	62.3005
5	5	28.1697	2.097	2	204	254	234	254	45.8303
5	5	14.8043	2.10865	2	152	182	252	182	167.196
5	5	14	2.30815	1	149	249	289	149	135
5	5	19.5922	2.77998	2	178	8	138	8	168.408
5	5	22.3008	2.3806	2	156	276	266	276	118.301
5	5	26.8403	2.62999	2	229	209	289	209	55.8403
5	5	17.3045	2.71156	2	183	83	203	83	65.6955
5	6	7.43495	1.9869	1	56	136	66	56	63.4349
5	6	20.5572	2.68013	3	233	153	223	223	22.4428
5	6	17.2737	2.44739	1	115	85	35	115	132.274
5	6	14.3893	2.89755	3	314	284	234	234	39.6107
5	6	11.8428	2.26116	3	180	250	220	220	51.8428
5	6	18.9164	2.68372	1	46	66	176	46	64.9164
5	6	18.1022	1.97086	2	61	51	71	51	69.1022
5	6	37.6425	2.15979	3	130	210	190	190	47.6425
5	6	9.35899	2.2882	2	190	260	210	260	70.641
5	6	72.3141	2.19916	3	208	108	238	238	130.314
5	6	75.359	1.89666	1	281	171	201	281	25.641
5	6	38.7636	2.52423	2	112	92	42	92	130.764
5	6	0.282559	1.69618	2	250	290	280	290	110.283
5	6	46.4518	2.66759	2	93	183	143	183	136.548
5	6	21.3693	2.43416	3	308	268	198	198	39.3693
5	6	0.9321	2.68845	2	238	158	188	158	157.068
5	6	27.2157	2.39956	3	242	292	142	142	169.216
5	6	1.07961	2.70499	1	184	114	154	184	5.07961
5	6	2.99099	3.18441	3	269	289	189	189	6.00901
5	6	31.4622	2.14574	1	171	131	241	171	139.538
5	6	29.3893	2.03014	1	111	131	171	111	140.389
5	6	25.3099	2.43988	2	311	211	291	211	56.3099
5	6	24.3999	1.64589	3	186	176	286	286	130.4
5	6	16.1134	2.57657	1	180	230	250	180	16.1134
5	6	42.0928	1.87336	1	85	185	155	85	127.093
5	6	55	2.02095	2	335	235	185	235	0
5	6	22.8141	2.52227	3	76	196	116	116	138.814
5	6	14.8624	1.50203	2	263	213	223	213	47.8624
5	6	85.4926	2.01764	1	42	132	32	42	136.507
5	6	6.09476	2.91148	2	234	174	214	174	167.905
6	1	42.047	2.44523	3	74	124	184	184	141.953
6	1	36.6938	3.61066	3	204	224	194	194	157.306
6	1	47.9832	2.48055	2	146	106	246	106	153.983
6	1	20.6409	3.02372	3	304	314	284	284	124.641
6	1	36.5169	2.2622	1	272	212	252	272	128.517
6	1	30	1.40829	1	240	120	140	240	90
6	1	57	0.610601	1	213	83	223	213	90
6	1	32.4171	2.99586	2	157	267	287	267	54.5829
6	1	13.5482	2.59741	1	123	13	53	123	136.548
6	1	7.38014	3.88289	2	185	195	115	195	22.3801
6	1	28.3785	2.64179	2	57	77	97	77	48.6215
6	1	25.9717	2.54374	3	65	55	165	165	139.028
6	1	18.9696	4.7161	1	236	166	246	236	37.0304
6	1	16.0906	4.05593	1	298	308	228	298	134.091
6	1	14.0561	2.61821	3	181	231	321	321	155.056
6	1	18.3978	1.88007	1	316	276	286	316	154.398
6	1	8.15239	3.15937	3	315	265	235	235	46.8476
6	1	15.4652	3.44771	3	233	333	313	313	148.465
6	1	7.03751	6.00221	2	116	166	146	166	158.962
6	1	16.4222	2.88373	3	154	234	134	134	150.422
6	1	23.0128	2.46657	1	295	235	155	295	138.013
6	1	22.2072	2.85726	1	197	137	267	197	39.2072
6	1	12	2.55176	2	148	258	138	258	90
6	1	33.1844	6.13253	2	219	279	209	279	132.184
6	1	30.6444	5.86813	3	146	136	216	216	66.6444
6	1	20.9691	3.63843	2	268	158	188	158	137.031
6	1	1.02549	2.82034	3	142	122	112	112	113.025
6	1	23.2933	4.1144	2	49	149	89	149	125.707
6	1	11.3099	3.16178	1	225	145	155	225	56.3099
6	1	12.3777	2.97031	2	285	165	265	165	152.622
6	2	5.0506	4.39887	1	112	222	252	112	117.051
6	2	23.8298	2.53627	1	195	155	285	195	38.8298
6	2	13.1736	5.83256	1	191	181	211	191	24.1736
6	2	22.3693	2.36243	2	133	73	153	73	50.6307
6	2	19.7495	5.35097	2	274	184	194	184	23.7495
6	2	11.6013	2.55115	3	221	191	151	151	139.399
6	2	10.5345	2.11971	3	216	106	176	176	165.466
6	2	7.60973	2.81933	1	186	226	236	186	13.6097
6	2	36.2858	4.72116	2	243	123	203	123	159.286
6	2	6.97102	2.63707	3	169	299	129	129	135.971
6	2	29.0054	2.74306	1	177	317	187	177	147.995
6	2	0.242468	2.85908	2	327	347	297	347	167.242
6	2	56	1.13772	2	194	214	174	214	90
6	2	14.2539	4.78967	2	110	190	180	190	24.2539
6	2	34.1859	2.95475	2	323	263	163	263	48.8141
6	2	4.42874	3.22734	3	207	187	157	157	152.571
6	2	4.32558	7.40542	2	165	155	175	155	159.326
6	2	30.4762	4.67889	3	183	93	83	83	52.5238
6	2	4.25384	4.90933	2	338	238	298	238	53.7462
6	2	1.875	5.53282	3	266	156	236	236	57.875
6	2	18.9816	5.2526	1	169	229	279	169	150.018
6	2	21.3462	4.95112	3	199	99	139	139	160.346
6	2	7	4.69531	1	232	202	192	232	45
6	2	2.30028	3.93072	1	147	87	167	147	149.3
6	2	0.736268	4.72304	2	202	212	102	212	31.2637
6	2	17.2564	7.36666	3	143	33	13	13	30.2564
6	2	37.6192	4.69927	1	95	235	215	95	57.3808
6	2	27.8324	1.90255	3	267	227	147	147	119.168
6	2	10.9697	2.35395	1	141	171	41	141	130.03
6	2	5.76829	7.33045	3	94	134	264	264	78.2317
6	3	14.4623	6.50011	1	130	190	220	130	144.462
6	3	30.0908	2.36731	2	263	103	203	103	133.091
6	3	83	0.935593	2	217	187	167	187	90
6	3	30.1702	2.97592	3	191	91	111	111	141.17
6	3	6.81508	2.61673	3	96	206	146	146	139.185
6	3	15.706	2.20655	3	147	267	167	167	151.294
6	3	9.65981	2.23213	3	229	249	299	299	128.66
6	3	12.2933	2.95412	1	132	162	212	132	144.293
6	3	1.89055	5.46673	2	96	66	166	66	67.8906
6	3	5.39302	2.89311	3	243	233	293	293	118.393
6	3	8.15723	3.78463	2	220	240	140	240	51.8428
6	3	31.3803	3.40923	3	258	188	228	228	79.3803
6	3	8.3533	2.59034	2	289	129	169	129	137.353
6	3	20.9191	5.57184	1	247	207	157	247	46.0809
6	3	64	0.728475	2	76	206	176	206	90
6	3	26.7263	1.90454	2	169	159	99	159	132.274
6	3	10.2914	4.80812	3	256	236	206	206	15.7086
6	3	43.8699	3.4097	1	97	87	177	97	53.1301
6	3	27.6307	2.4632	1	157	267	227	157	129.369
6	3	14.2307	1.30191	3	250	260	230	230	64.2307
6	3	2.25533	3.51726	1	205	155	85	205	27.2553
6	3	22.3885	3.60934	2	311	191	221	191	33.3885
6	3	28.0035	2.79469	2	77	107	47	107	78.9965
6	3	3.68468	4.99577	1	182	282	272	182	178.315
6	3	29.4623	1.22486	2	310	200	180	200	170.538
6	3	24.0754	4.33993	1	223	183	213	223	18.9246
6	3	71	0.968288	3	41	181	161	161	90
6	3	7.29304	3.47704	3	139	209	159	159	166.293
6	3	43.9908	2.54387	1	207	177	277	207	163.009
6	3	29.9638	8.07602	1	224	214	314	224	14.0362
6	4	3	4.50706	1	228	208	288	228	45
6	4	7.87599	5.05165	1	203	113	213	203	15.124
6	4	16.4314	4.6614	3	194	144	54	54	37.5686
6	4	9.76933	2.48431	2	204	164	184	164	154.231
6	4	2.79676	6.30762	3	162	232	192	192	14.7968
6	4	30.971	3.27884	2	125	75	145	75	44.029
6	4	64.2637	3.48935	1	213	163	283	213	148.736
6	4	22.0091	3.05246	1	109	159	79	109	131.009
6	4	20.4077	2.07082	3	235	135	175	175	154.592
6	4	37.8699	5.05773	1	226	86	196	226	8.1301
6	4	31.5238	4.83249	2	139	69	49	69	37.4762
6	4	2.14669	1.68244	3	185	235	305	305	127.147
6	4	12.2551	3.11333	2	292	312	242	312	119.745
6	4	17.9264	4.48893	3	199	249	259	259	61.0736
6	4	2.56859	3.8878	1	215	315	295	215	37.5686
6	4	0.438989	2.67898	2	116	146	126	146	145.561
6	4	2.09189	3.68214	2	231	191	161	191	13.0919
6	4	7.94519	2.63325	1	131	251	211	131	138.945
6	4	23.0054	4.31102	1	216	286	226	216	12.9946
6	4	9.97439	3.91863	2	241	151	191	151	160.974
6	4	13.0169	5.86654	1	192	302	182	192	25.0169
6	4	38.2643	3.17707	1	265	115	215	265	46.7357
6	4	0.385944	3.85808	2	123	223	233	223	42.6141
6	4	17.4896	5.09669	3	170	270	150	150	132.51
6	4	9.55226	5.63608	3	269	249	239	239	68.5523
6	4	24.1414	3.83412	3	266	246	276	276	120.141
6	4	4.125	2.10828	2	263	163	183	163	167.125
6	4	12.8699	3.18374	3	191	271	201	201	8.1301
6	4	5.196	6.09252	3	68	78	38	38	43.196
6	4	17.4543	8.2798	2	293	333	173	333	135.546
6	5	6.39718	5.7477	3	120	170	220	220	46.3972
6	5	32.9909	2.54084	3	136	126	196	196	48.9909
6	5	33.5778	3.63315	1	229	249	219	229	15.4222
6	5	14.6105	2.18331	3	84	114	104	104	118.61
6	5	19.9946	5.44823	2	247	187	197	187	167.005
6	5	25.3245	3.6185	1	168	58	28	168	13.3245
6	5	30.0908	4.04845	2	137	77	127	77	46.9092
6	5	23.4477	2.02662	3	17	117	137	137	113.552
6	5	16.8779	1.98088	1	115	265	135	115	131.878
6	5	22.7352	2.52947	1	170	270	250	170	147.265
6	5	7.12502	2.21759	3	225	185	135	135	142.125
6	5	42.0686	1.32791	1	237	137	77	237	14.9314
6	5	16.7966	4.3329	2	153	203	133	203	6.20345
6	5	33.3058	3.86107	2	66	206	166	206	172.694
6	5	37.5288	4.30796	1	70	190	60	70	32.4712
6	5	10.9315	3.09932	3	221	181	71	71	60.0685
6	5	15.5297	2.43852	2	215	165	185	165	149.47
6	5	13.2011	1.7087	3	42	182	102	102	115.201
6	5	9.98721	3.16436	3	248	118	148	148	138.013
6	5	6.03026	2.96119	2	64	124	144	124	130.03
6	5	23	4.13763	3	152	232	202	202	45
6	5	21.0939	5.92968	1	162	172	152	162	140.906
6	5	14.4472	3.84308	2	232	222	162	222	27.5528
6	5	28.4569	4.72024	2	251	231	241	231	22.5431
6	5	16.4403	2.64387	1	124	194	284	124	140.44
6	5	7.56505	4.76597	1	199	279	159	199	26.5651
6	5	14.2176	3.14638	2	301	291	231	291	125.218
6	5	34.9726	3.29492	1	161	271	191	161	126.027
6	5	24	4.36216	2	331	291	321	291	135
6	5	0.169139	4.07846	3	99	59	89	89	88.8309
6	6	13.9061	2.74367	3	267	257	217	217	50.9061
6	6	3.04704	2.44417	3	85	45	125	125	128.047
6	6	21.0128	3.23434	3	197	227	207	207	48.0128
6	6	12.8377	2.60838	3	277	317	157	157	144.162
6	6	9.25512	7.71414	1	174	94	114	174	164.745
6	6	27	4.44935	1	72	122	202	72	45
6	6	35	3.34782	3	210	270	260	260	45
6	6	25.0303	6.24826	2	285	165	255	165	139.97
6	6	14.0169	3.87427	3	299	269	169	169	154.983
6	6	13.6888	2.59714	1	131	211	111	131	144.689
6	6	9.44395	7.52257	1	165	175	295	165	155.556
6	6	24.2317	3.15004	2	199	99	119	99	123.232
6	6	16.2011	3.67014	1	81	71	91	81	64.7989
6	6	29.7436	3.84876	2	130	30	160	30	59.7436
6	6	4	3.0114	2	111	131	141	131	135
6	6	20.6522	4.06551	3	38	88	28	28	48.6522
6	6	3.01279	1.65565	1	135	275	145	135	131.987
6	6	11.0362	3.41014	1	228	138	258	228	59.0362
6	6	27.1941	2.01585	3	171	161	141	141	113.806
6	6	6.30576	2.76548	2	126	46	146	46	52.3058
6	6	3.09028	1.73829	1	309	239	249	309	125.91
6	6	20.0546	1.69836	1	171	301	221	171	150.945
6	6	0.370622	4.34992	2	274	204	244	204	23.6294
6	6	45.5482	12.4583	2	219	89	79	89	43.4518
6	6	12.2397	2.02441	2	224	144	284	144	131.76
6	6	6.65981	7.15435	2	192	212	172	212	38.6598
6	6	13.6501	2.39443	3	76	226	86	86	72.3499
6	6	8.02053	1.78765	1	126	66	116	126	117.979
6	6	57	0.857046	3	263	193	213	213	90
6	6	87.0362	3.4754	2	173	253	163	253	165.964
7	1	65.8584	6.90858	1	266	146	246	266	151.858
7	1	76.4472	6.26322	2	266	256	286	256	152.447
7	1	22.7751	7.24534	3	102	22	92	92	114.775
7	1	17.834	4.42393	1	144	264	214	144	161.834
7	1	39.8141	3.48181	3	271	331	261	261	41.1859
7	1	31.6294	4.33686	1	188	158	318	188	156.371
7	1	13.2894	4.54493	2	119	199	169	199	5.71059
7	1	14.3764	5.76521	2	304	174	294	174	159.624
7	1	21.573	4.96958	2	255	285	275	285	126.573
7	1	20.1664	3.39836	1	165	195	95	165	144.834
7	1	6.77783	5.56771	3	132	52	62	62	55.2222
7	1	11.7688	2.99644	3	241	291	211	211	42.7688
7	1	17.6938	3.33778	1	185	205	155	185	22.6938
7	1	9.29061	3.1939	3	108	48	38	38	47.2906
7	1	70	0.510833	1	160	210	80	160	90
7	1	10.9575	4.09951	3	216	186	196	196	5.04245
7	1	12.8337	3.11048	3	45	105	35	35	22.1663
7	1	31.6764	4.66191	2	316	176	256	176	144.324
7	1	15.0952	5.18845	3	100	180	140	140	155.095
7	1	17.9194	3.30558	3	227	147	197	197	34.9194
7	1	17.0546	2.97722	2	152	192	212	192	29.0546
7	1	17.2505	7.04257	2	134	94	144	94	111.251
7	1	18.0725	3.84395	2	63	33	53	33	51.0725
7	1	28	0.609884	1	62	112	192	62	90
7	1	26.6951	2.83999	1	140	250	150	140	113.305
7	1	4.16589	4.13382	2	192	232	242	232	47.8341
7	1	12	0.542009	3	122	142	102	102	90
7	1	30.8337	4.45823	1	127	47	177	127	157.834
7	1	0.0302593	5.80791	1	175	35	105	175	175.03
7	1	1.53878	4.15483	2	122	152	182	152	150.461
7	2	38.4915	2.56745	2	173	73	203	73	34.5085
7	2	39.6713	3.45218	1	289	239	199	289	148.671
7	2	26.4403	2.38631	2	174	204	264	204	50.4403
7	2	75.2364	2.51978	2	245	125	95	125	49.7636
7	2	76	0.659139	2	186	166	46	166	90
7	2	16	2.61028	3	71	131	61	61	45
7	2	88.7363	3.50392	1	300	190	290	300	31.2637
7	2	60	0.567502	3	180	30	150	150	90
7	2	30.9503	5.3484	1	71	101	91	71	40.0497
7	2	21.4181	3.00864	1	332	232	312	332	173.418
7	2	46.0081	3.68177	2	133	233	173	233	6.99193
7	2	16.2161	3.08907	3	249	239	259	259	62.7839
7	2	18.3803	2.76777	2	86	106	196	106	124.38
7	2	3.40536	2.76514	1	56	146	186	56	52.5946
7	2	54.7816	2.68158	3	204	134	274	274	148.782
7	2	14.9987	2.18498	3	173	273	293	293	127.999
7	2	42.5104	3.9619	1	90	70	180	90	47.4896
7	2	24.2553	4.73018	2	298	228	278	228	72.2553
7	2	47.4472	3.21019	2	185	255	265	255	27.5528
7	2	50.7928	2.48806	3	280	200	270	270	39.2072
7	2	42.1572	4.51912	1	266	106	226	266	128.157
7	2	12.2643	3.77098	1	121	51	161	121	133.264
7	2	24	0.751649	1	246	96	106	246	90
7	2	18.6341	2.25627	3	208	78	108	108	126.634
7	2	30.2847	2.28282	3	171	161	101	101	131.285
7	2	3.52557	2.89782	2	156	166	96	166	162.474
7	2	0.169685	2.78117	1	226	176	256	226	45.8303
7	2	1.41806	2.77431	3	197	237	217	217	38.4181
7	2	5.86598	2.14308	2	226	206	316	206	31.866
7	2	5.8699	2.94755	3	151	241	121	121	126.87
7	3	18.1233	4.4619	2	228	298	308	298	136.123
7	3	14.4287	3.40358	2	266	216	156	216	21.5713
7	3	15.9279	3.55814	1	137	117	127	137	152.928
7	3	7.90375	3.72258	2	218	168	98	168	160.096
7	3	0.988717	2.78237	3	72	12	22	22	22.9887
7	3	35	0.575083	1	125	55	105	125	90
7	3	3.72631	4.61615	2	186	136	56	136	132.274
7	3	5.24052	4.14195	3	138	148	188	188	13.2405
7	3	0.537678	2.51419	3	275	255	215	215	35.5377
7	3	5.53507	2.96196	2	73	153	113	153	147.465
7	3	10.3524	2.64245	1	228	298	248	228	37.6476
7	3	13.0685	2.11256	3	123	93	223	223	29.9315
7	3	23.1593	3.00811	2	248	188	258	188	31.1593
7	3	46.8387	5.13765	1	157	167	277	157	23.8387
7	3	42.0546	2.62549	2	273	193	223	193	150.945
7	3	25.4692	2.54784	1	34	24	144	34	8.53077
7	3	7.80651	3.82367	3	214	184	144	144	136.193
7	3	3.46823	3.61782	2	285	315	275	315	138.468
7	3	86	0.831699	2	24	4	164	4	90
7	3	61.0251	3.39721	1	198	88	78	198	136.975
7	3	50.359	2.91456	3	281	261	121	121	70.641
7	3	48.607	3.58606	1	103	163	73	103	151.607
7	3	29.8377	2.1993	1	276	216	316	276	125.838
7	3	4.1301	2.16885	3	349	219	319	319	143.13
7	3	3.45	3.10177	3	91	101	171	171	167.55
7	3	12.8153	2.673	2	80	230	200	230	37.1847
7	3	28.6914	2.87562	1	110	210	160	110	138.691
7	3	12.0939	2.57497	3	203	173	243	243	50.9061
7	3	34.6105	2.96777	1	129	139	199	129	163.61
7	3	2.81508	2.3165	3	317	157	187	187	4.18492
7	4	10.5014	2.99754	3	61	201	191	191	21.5014
7	4	25.5792	5.41933	2	305	175	325	175	149.421
7	4	65.1523	4.51882	3	183	113	213	213	147.848
7	4	3.72556	2.87663	2	127	107	187	107	110.726
7	4	28.2026	3.39985	1	154	184	214	154	2.2026
7	4	45.6992	3.28892	1	286	176	336	286	151.699
7	4	6.60282	3.04801	3	247	267	307	307	133.603
7	4	33.8059	4.77868	1	125	175	225	125	158.806
7	4	1.10091	4.01961	2	131	141	81	141	139.899
7	4	16.3801	5.44108	2	116	96	196	96	112.38
7	4	9.6052	3.09544	1	135	195	205	135	144.605
7	4	40.1292	3.9947	2	129	209	169	209	168.871
7	4	15.6105	2.71185	2	263	283	293	283	118.61
7	4	14.8637	3.32749	1	145	95	195	145	159.864
7	4	33.2974	2.52758	1	303	253	283	303	156.297
7	4	8.03623	3.23168	2	74	194	184	194	22.0362
7	4	1.90524	3.13752	3	86	216	166	166	167.905
7	4	10.992	2.20934	3	144	194	114	114	124.992
7	4	2.05481	2.54296	3	161	211	141	141	138.945
7	4	28.1376	2.53112	1	14	54	74	14	42.1376
7	4	11.9245	4.4032	1	81	91	171	81	69.0755
7	4	28.5739	3.42954	2	171	201	211	201	49.5739
7	4	81.5206	3.80659	1	256	186	226	256	157.521
7	4	8.39744	2.17602	2	114	34	64	34	42.3974
7	4	55.5603	4.52103	2	13	83	173	83	27.4397
7	4	40.6678	3.95658	3	117	37	87	87	46.3322
7	4	10.5528	4.02157	3	222	202	242	242	72.5528
7	4	5	3.75115	3	165	155	185	185	0
7	4	8.14139	2.94771	3	73	153	203	203	14.8586
7	4	36.8043	4.28023	1	111	171	181	111	147.804
7	5	6.56505	3.16533	3	210	220	200	200	26.5651
7	5	1.14434	2.32537	1	195	145	215	195	16.1443
7	5	0.559965	7.10546	3	95	145	115	115	115.56
7	5	63.3402	5.06482	3	122	182	12	12	128.66
7	5	6.0975	2.79125	3	166	316	176	176	169.902
7	5	22.1986	2.16468	1	181	221	241	181	23.1986
7	5	10.1664	1.97748	3	95	75	155	155	144.834
7	5	23.8476	5.73063	1	139	299	259	139	162.848
7	5	82.2176	2.96251	2	197	137	257	137	54.7824
7	5	26.556	3.0473	3	256	266	276	276	69.444
7	5	68.9638	3.54569	1	277	177	207	277	165.964
7	5	38	0.637917	3	298	328	308	308	90
7	5	32.4846	4.36829	1	163	253	193	163	130.515
7	5	15.9275	2.86095	2	106	46	96	46	61.9275
7	5	19.9606	2.96373	2	222	272	192	272	111.961
7	5	6.04541	4.38441	1	176	226	106	176	2.04541
7	5	35.6335	3.36169	1	174	144	234	174	138.366
7	5	30.727	5.04999	2	247	167	277	167	136.273
7	5	25.0362	3.64438	2	224	124	214	124	149.036
7	5	36.5275	5.05417	1	194	124	254	194	50.5275
7	5	48.556	5.89643	3	182	162	152	152	20.556
7	5	2.70644	3.42012	3	256	136	216	216	33.2936
7	5	6.85331	2.62552	2	66	46	106	46	52.8533
7	5	9.44774	2.33954	2	133	213	123	213	23.5523
7	5	11.2744	3.8077	2	222	212	132	212	20.7256
7	5	58.9166	5.03288	3	132	142	212	212	153.083
7	5	4.90524	2.81919	2	267	197	137	197	12.0948
7	5	53.6105	3.50463	1	205	175	245	205	151.39
7	5	82.6667	3.91198	2	329	239	219	239	141.667
7	5	87.2553	3.01585	1	330	210	260	330	62.7447
7	6	25.0546	4.78435	1	139	269	189	139	164.055
7	6	10.8141	2.57741	1	128	208	118	128	138.814
7	6	28.6955	4.33031	3	122	12	82	82	110.695
7	6	11.6075	2.87441	3	300	330	200	200	31.6075
7	6	64.4237	1.90899	2	243	293	213	293	48.5763
7	6	17	0.436986	3	173	303	253	253	90
7	6	58.6995	2.81943	1	211	181	161	211	152.301
7	6	4.59229	2.64442	2	300	240	160	240	55.4077
7	6	16.6199	2.93901	2	201	141	271	141	157.62
7	6	21.5238	2.29513	3	99	109	59	59	37.4762
7	6	0.659808	2.8583	3	222	262	232	232	51.3402
7	6	21.1859	2.57718	3	110	150	160	160	138.814
7	6	4.0546	2.00208	1	205	245	165	205	29.0546
7	6	38	0.603449	2	252	232	282	232	90
7	6	66.4633	3.68503	2	74	94	134	94	160.463
7	6	7.38954	2.43647	3	256	226	216	216	28.6105
7	6	0.924502	2.25055	1	200	100	180	200	20.9245
7	6	10.8658	1.99701	1	134	244	234	134	144.866
7	6	67.3099	3.30192	1	191	201	251	191	123.69
7	6	28.8014	5.39355	2	138	38	8	38	66.8014
7	6	2.47618	1.96661	2	130	190	100	190	7.52382
7	6	69.4156	5.12387	2	225	195	325	195	125.584
7	6	24.3563	1.85473	3	120	170	290	290	134.356
7	6	24	1.0497	1	294	284	174	294	90
7	6	14.3333	4.24392	2	221	271	121	271	105.333
7	6	33.9279	8.24989	1	164	184	54	164	17.9279
7	6	86.9439	7.08422	1	118	208	258	118	24.9439
7	6	8.39718	3.27901	2	98	128	248	128	136.397
7	6	1	2.40962	3	211	191	271	271	90
7	6	29.1247	2.68809	3	336	326	296	296	145.125
8	1	7.97439	2.86974	3	78	128	108	108	115.974
8	1	1.51853	6.61647	3	13	103	43	43	44.5185
8	1	43.5686	3.94248	1	264	154	164	264	127.569
8	1	12.3112	3.70641	1	67	17	7	67	54.6888
8	1	23.7244	5.21008	2	164	34	124	34	57.7244
8	1	77.9454	3.8237	1	253	173	233	253	150.945
8	1	88.6013	3.65761	2	38	48	158	48	139.399
8	1	34.7989	3.10425	3	257	197	267	267	121.799
8	1	1.61069	5.15174	1	308	268	158	308	129.611
8	1	18.8161	5.3444	1	90	100	150	90	108.816
8	1	6.21585	3.81247	2	217	127	67	127	120.784
8	1	5.92625	3.21	2	124	94	144	94	99.9262
8	1	5.17983	6.42393	3	243	193	223	223	48.1798
8	1	39	4.36153	3	216	166	186	186	45
8	1	20.4623	4.17007	2	144	214	104	214	54.4623
8	1	29.5686	5.30257	3	268	208	188	188	37.5686
8	1	3.93567	4.53803	2	194	134	164	134	137.936
8	1	5.67435	4.13009	2	64	104	134	104	98.3257
8	1	14.9946	3.20977	2	78	88	178	88	102.995
8	1	2.34618	4.27973	3	83	13	113	113	115.346
8	1	51.3179	4.2187	3	220	170	240	240	111.318
8	1	44.9348	8.72021	1	184	94	174	184	48.9348
8	1	8.12502	2.70779	1	134	184	54	134	142.125
8	1	40.008	7.12338	1	195	145	205	195	55.008
8	1	30.5651	4.41483	3	244	254	94	94	63.4349
8	1	1.06849	5.37262	2	86	76	96	76	74.9315
8	1	0.0470425	3.75342	1	97	207	137	97	96.953
8	1	72.8387	5.07385	3	266	306	176	176	68.8387
8	1	29.177	4.74863	2	160	140	190	140	169.177
8	1	21.6005	4.64096	1	188	218	268	188	166.399
8	2	51.9228	5.15527	3	156	116	176	176	124.077
8	2	33.6507	3.65959	3	211	261	161	161	127.349
8	2	38.5651	3.98654	1	258	278	208	258	116.565
8	2	24.1466	3.59945	1	207	127	187	207	51.1466
8	2	11.5651	3.18494	2	125	165	155	165	153.435
8	2	21.3333	3.38978	2	217	197	57	197	38.3333
8	2	27.6901	3.91488	3	204	244	264	264	56.3099
8	2	15.5819	3.54642	2	276	216	316	216	51.5819
8	2	18.9314	3.55051	2	126	86	176	86	104.931
8	2	34	1.92728	3	126	146	236	236	90
8	2	28	4.84721	3	283	243	253	253	45
8	2	7.0975	2.52144	2	92	132	162	132	124.902
8	2	7.69605	3.99738	1	45	175	155	45	37.3039
8	2	1.156	3.30699	2	89	129	59	129	130.156
8	2	2.81503	3.74607	2	84	124	104	124	121.185
8	2	38.4915	3.31051	2	53	163	103	163	124.509
8	2	13.6952	3.43006	2	261	291	321	291	124.695
8	2	3.12502	3.92	1	131	201	241	131	127.875
8	2	2.2072	6.81986	3	247	237	217	217	39.2072
8	2	33.2705	4.09724	2	85	165	45	165	131.73
8	2	21.5035	3.51644	3	23	43	153	153	131.496
8	2	30.3948	3.29622	3	225	115	175	175	144.605
8	2	14.0679	3.55574	3	88	168	188	188	22.0679
8	2	8.44293	5.56403	1	70	150	210	70	61.5571
8	2	54.3456	4.10492	1	119	179	139	119	173.346
8	2	3.05762	3.81659	1	202	142	152	202	25.0576
8	2	16.4349	4.33415	1	43	123	93	43	26.5651
8	2	10.1301	3.39831	1	47	147	7	47	36.8699
8	2	27.9279	4.14359	1	125	155	145	125	152.928
8	2	28.047	3.80401	3	280	270	170	170	141.953
8	3	11.0755	4.49181	3	148	128	238	238	69.0755
8	3	13.6366	2.84732	1	57	17	97	57	43.3634
8	3	34.3097	3.32976	1	170	90	230	170	135.69
8	3	12.0303	3.44149	1	208	188	138	208	40.0303
8	3	10.3478	3.13586	2	159	239	209	239	48.6522
8	3	0.690068	4.36798	2	183	213	193	213	33.6901
8	3	77.0416	4.06044	2	239	329	249	329	46.0416
8	3	4.46082	4.86722	2	220	150	110	150	145.539
8	3	1.61149	3.56179	3	175	205	325	325	146.611
8	3	11.8309	3.28229	1	58	198	88	58	46.1691
8	3	34.789	5.60145	1	107	157	57	107	141.789
8	3	42.4831	3.02677	1	279	169	219	279	141.483
8	3	1.11447	3.59678	2	107	57	77	57	55.8855
8	3	4.76364	2.92199	1	45	135	75	45	49.7636
8	3	26.0928	4.16576	2	129	169	39	169	142.907
8	3	23.5297	3.09064	3	203	83	173	173	149.47
8	3	70.9726	3.72972	2	313	253	213	253	143.973
8	3	68.1944	3.97768	3	172	22	72	72	140.194
8	3	4.00887	3.61862	2	174	154	114	154	158.009
8	3	36.0546	3.45625	2	153	263	133	263	119.055
8	3	6.69924	2.66658	1	280	310	220	280	106.699
8	3	12.5638	3.6494	2	25	145	75	145	132.436
8	3	18.3402	3.19568	3	203	223	123	123	141.34
8	3	80.5289	3.24882	3	136	286	226	226	126.529
8	3	13.7778	3.81933	3	231	221	201	201	34.7778
8	3	22.5377	4.06476	3	162	72	182	182	24.5377
8	3	64.5431	2.90369	1	42	142	72	42	157.457
8	3	14.4077	2.90331	3	79	69	229	229	34.5923
8	3	55.5651	3.09061	1	209	159	169	209	153.435
8	3	4.30187	2.95358	3	139	99	179	179	3.30187
8	4	83.4703	3.19049	2	164	204	74	204	120.53
8	4	17.2005	2.68371	1	230	200	110	230	32.7995
8	4	9.29714	3.81076	1	269	179	239	269	98.2971
8	4	28.5651	2.80892	2	188	268	118	268	116.565
8	4	23.6743	3.24995	2	163	283	243	283	126.674
8	4	32.2072	4.44434	2	207	187	307	187	39.2072
8	4	16.113	3.62667	3	305	245	175	175	11.113
8	4	14.3062	2.42053	2	108	98	188	98	112.306
8	4	3.0546	3.09826	3	171	91	71	71	74.0546
8	4	12.1986	2.81345	1	101	211	121	101	113.199
8	4	8.43495	2.9473	1	125	235	165	125	116.565
8	4	31.3665	2.95951	3	283	323	253	253	41.6335
8	4	6.14684	2.55194	2	185	205	165	205	18.8532
8	4	19.3268	1.88853	1	287	187	177	287	126.327
8	4	17.9423	2.93142	1	262	242	292	262	64.0577
8	4	3.29016	2.5476	3	315	195	235	235	51.7098
8	4	11.8753	2.20793	1	113	63	123	113	124.875
8	4	4.68468	1.92509	3	198	98	138	138	133.315
8	4	1.44774	1.90886	1	160	180	140	160	158.552
8	4	11.1155	2.44465	1	230	170	290	230	38.8845
8	4	1.24902	1.99473	3	219	229	159	159	157.751
8	4	2.30993	2.19198	3	66	136	36	36	33.6901
8	4	21.844	2.20518	3	42	102	152	152	130.156
8	4	15.029	2.18278	2	101	241	251	241	45.971
8	4	35.2397	3.11168	2	143	103	133	103	138.24
8	4	8.43141	4.68728	3	274	254	134	134	142.431
8	4	19.8151	5.31827	1	159	209	139	159	139.185
8	4	55.2902	2.02605	2	107	197	277	197	141.71
8	4	27.0283	2.23606	3	288	168	158	158	130.972
8	4	22.6422	3.23419	2	177	187	147	187	164.358
8	5	11.704	4.20136	1	91	211	61	91	79.296
8	5	24.2914	2.78662	3	195	305	275	275	119.291
8	5	2.38435	2.19208	1	124	54	34	124	126.384
8	5	1.66978	3.84512	2	174	144	64	144	145.67
8	5	31.0306	3.87161	3	146	96	116	116	147.031
8	5	27.9645	2.83436	2	193	113	163	113	140.964
8	5	2.9245	2.08843	2	228	198	178	198	20.9245
8	5	7	2.98343	1	83	193	203	83	90
8	5	23.6609	4.67269	2	264	234	144	234	77.6609
8	5	33.1737	4.66746	3	296	216	186	186	39.1737
8	5	0.749494	4.61785	2	183	203	123	203	23.7495
8	5	11	5.71952	3	136	196	236	236	45
8	5	3.97041	5.98794	1	150	160	180	150	153.97
8	5	17.8387	3.71244	1	84	164	44	84	66.1613
8	5	31.5638	5.37585	3	134	114	164	164	132.436
8	5	88.4518	3.3049	2	165	45	115	45	136.548
8	5	16.2249	3.49632	2	244	184	304	184	20.2249
8	5	11.3439	2.4279	1	132	92	72	132	143.344
8	5	0.601295	2.45371	3	60	160	50	50	49.3987
8	5	64.9869	2.44804	1	65	125	175	65	129.987
8	5	2.26477	2.45893	3	185	115	145	145	147.265
8	5	22.6192	2.4813	1	260	230	210	260	57.3808
8	5	1.59242	2.2805	3	214	254	164	164	162.408
8	5	34.8789	3.22341	3	132	172	82	82	47.1211
8	5	7.47618	2.23367	1	120	270	230	120	127.476
8	5	38.3974	2.97935	2	134	274	204	274	132.397
8	5	14.0755	1.93262	2	280	170	210	170	155.925
8	5	21.4054	4.98865	3	236	306	196	196	37.4054
8	5	4.51045	4.28181	2	252	232	222	232	47.4896
8	5	13.556	2.23261	1	142	232	212	142	155.556
8	6	6.39718	2.84817	1	185	135	165	185	178.603
8	6	1.89624	2.17834	1	160	170	60	160	161.896
8	6	28.1301	2.42761	2	165	245	125	245	36.8699
8	6	78.5792	2.40563	2	118	228	198	228	149.421
8	6	39.9625	2.07106	1	119	89	99	119	158.962
8	6	66.646	2.28198	3	136	146	96	96	162.646
8	6	56.9052	3.9449	2	151	111	71	111	167.905
8	6	27.4222	2.07743	1	237	277	147	237	29.5778
8	6	38.5014	2.66409	2	202	152	192	152	113.499
8	6	29.9452	1.97493	2	281	251	141	251	41.0548
8	6	1.45184	1.87205	2	272	222	202	222	43.4518
8	6	13.6209	2.08268	2	251	91	111	91	104.621
8	6	15.0042	1.56211	1	93	113	183	93	108.004
8	6	2.61565	2.4108	1	129	169	119	129	126.384
8	6	30.8056	2.4245	1	216	176	136	216	5.19443
8	6	28.8534	5.92229	3	210	120	190	190	38.8534
8	6	25.4986	3.66201	2	72	92	32	92	66.5014
8	6	68.556	2.72446	1	267	277	307	267	155.556
8	6	17.6992	2.36828	1	89	109	29	89	106.699
8	6	19.9279	2.64524	2	142	182	52	182	162.072
8	6	18.2176	2.73577	3	222	112	152	152	170.218
8	6	2.01279	2.2478	3	146	116	136	136	138.013
8	6	5.21009	2.31396	3	188	108	128	128	133.21
8	6	16.9094	2.66568	3	241	121	151	151	134.091
8	6	7.02737	1.75245	3	121	191	241	241	53.9726
8	6	28.4633	1.95362	3	128	218	228	228	19.5367
8	6	6.61565	2.44142	3	162	232	182	182	8.61565
8	6	12.1582	2.65581	1	159	289	169	159	171.158
8	6	14.4314	1.92237	3	42	182	52	52	37.5686
8	6	27.6598	3.40625	2	21	11	151	11	38.6598
9	1	0.645975	4.80074	2	128	198	178	198	17.354
9	1	4.18471	3.1143	1	213	203	103	213	37.1847
9	1	7.52382	2.40595	3	115	235	135	135	127.476
9	1	14.71	2.61549	3	209	219	169	169	154.29
9	1	14.3287	2.82124	3	63	33	163	163	148.671
9	1	11.2184	2.51136	2	90	110	240	110	121.218
9	1	15.7539	2.72681	1	160	140	280	160	144.246
9	1	18.6955	3.12262	1	227	257	177	227	65.6955
9	1	27.9065	4.22266	2	13	133	153	133	160.907
9	1	17.2737	1.52837	2	305	245	275	245	47.7263
9	1	20.7094	3.09659	2	308	158	288	158	137.291
9	1	3.11134	1.63584	2	110	60	200	60	56.8887
9	1	15.0169	1.61016	3	240	180	80	80	64.9831
9	1	1.60256	3.42429	3	204	264	134	134	132.397
9	1	21.6713	3.41793	1	127	157	117	127	148.671
9	1	10.1213	1.49527	1	107	187	267	107	117.121
9	1	33.3895	2.80299	1	152	242	142	152	118.61
9	1	3.1301	1.7484	1	220	200	170	220	36.8699
9	1	15.3578	3.35289	3	34	134	104	104	119.358
9	1	8.50353	1.53734	2	230	220	290	220	48.5035
9	1	25.7436	4.12141	1	304	164	224	304	149.744
9	1	5.2602	2.28508	3	271	201	191	191	16.2602
9	1	36.9946	2.62821	2	189	249	199	249	32.0054
9	1	10.6028	2.10214	3	163	113	33	33	43.6028
9	1	36.4222	2.84945	1	21	151	11	21	164.578
9	1	0.815025	4.56382	2	138	148	298	148	148.815
9	1	3.7816	2.50105	3	105	65	125	125	121.218
9	1	8.18492	3.34472	2	229	139	99	139	130.815
9	1	17.8658	3.23665	1	143	203	93	143	125.134
9	1	0.869898	3.69087	3	44	214	144	144	143.13
9	2	73	1.9683	2	87	197	167	197	90
9	2	12.1094	2.24152	1	145	245	85	145	157.109
9	2	56.8973	3.87147	2	159	209	169	209	152.103
9	2	20.0416	1.90646	3	176	146	116	116	136.042
9	2	1.91123	2.16205	3	75	105	185	185	6.91123
9	2	6.29005	1.37071	3	273	173	283	283	109.29
9	2	19.0239	2.03944	1	239	179	149	239	78.0239
9	2	10.8787	2.45353	1	83	203	243	83	72.1213
9	2	8.76517	1.99989	1	224	264	184	224	52.7652
9	2	15.2933	2.49747	1	141	211	201	141	125.707
9	2	3.29061	1.91695	3	64	184	44	44	47.2906
9	2	1.2184	2.40087	3	100	110	120	120	121.218
9	2	14.6507	3.58627	3	246	86	196	196	30.6507
9	2	17.5778	2.72742	2	158	168	138	168	150.422
9	2	3.67317	1.88729	1	310	210	220	310	126.327
9	2	11.5651	1.85463	3	215	265	285	285	116.565
9	2	18.9987	2.2128	2	251	161	281	161	142.001
9	2	3.23636	2.25864	3	73	93	233	233	49.7636
9	2	9.56859	2.00913	1	242	162	272	242	52.4314
9	2	9.80141	1.99107	1	192	212	162	192	21.8014
9	2	8.35775	2.15215	1	201	231	271	201	29.3578
9	2	4.13402	2.56082	2	289	189	239	189	13.134
9	2	4.15969	1.98101	2	90	60	110	60	55.8403
9	2	1.23067	1.87036	2	273	243	183	243	64.2307
9	2	12.3112	3.17752	2	7	67	57	67	54.6888
9	2	9.90477	1.65002	2	90	120	190	120	110.095
9	2	19.8855	3.4842	2	74	144	4	144	124.114
9	2	32.0679	2.24353	1	80	160	190	80	112.068
9	2	16.9987	2.01784	3	31	201	111	111	127.999
9	2	5.37625	2.07188	3	90	140	190	190	15.3763
9	3	8.35402	2.15706	3	111	131	81	81	72.646
9	3	0.772255	2.20559	3	170	90	70	70	69.2277
9	3	18.134	3.07117	2	95	85	195	85	103.134
9	3	3.42216	2.99394	3	238	278	258	258	74.5778
9	3	20.0935	3.41519	1	136	166	116	136	115.907
9	3	33.9638	3.04469	2	97	177	207	177	30.9638
9	3	29.1944	2.12282	1	249	139	119	249	39.8056
9	3	0.801409	2.28663	3	194	274	204	204	23.1986
9	3	2.39718	1.62212	2	241	91	131	91	88.6028
9	3	4.31962	2.07195	2	97	197	167	197	12.6804
9	3	76	3.73073	2	126	166	86	166	90
9	3	69.4349	2.06688	3	126	206	186	186	116.565
9	3	80.556	2.98922	1	285	215	295	285	24.444
9	3	5.64417	1.6666	3	114	44	124	124	129.644
9	3	11.9452	1.59323	3	53	153	143	143	131.055
9	3	63.7357	3.42266	1	107	27	97	107	43.2643
9	3	1.3925	1.89651	3	92	212	192	192	13.3925
9	3	8.52881	3.52389	1	176	116	146	176	167.471
9	3	6.30861	4.79977	2	200	190	180	190	3.69139
9	3	12.6901	2.5211	1	201	221	211	201	33.6901
9	3	0.451842	2.38484	3	213	263	223	223	43.4518
9	3	2.63658	2.54585	2	274	224	314	224	46.6366
9	3	10.0296	3.06979	1	119	229	259	119	108.97
9	3	0.83874	2.04893	1	112	212	182	112	111.161
9	3	8.02561	1.57147	1	79	59	219	79	70.9744
9	3	16.5288	2.88016	3	156	276	176	176	12.5288
9	3	17.2894	1.77109	2	188	248	268	248	50.7106
9	3	21.439	3.23206	2	153	283	233	283	124.439
9	3	31.8551	2.10587	1	166	126	266	166	134.145
9	3	15.8586	2.01727	2	46	136	176	136	120.141
9	4	81.444	2.51497	1	123	23	143	123	24.444
9	4	0.863697	2.24352	3	191	131	201	201	20.1363
9	4	16.5679	1.29692	2	138	108	178	108	91.4321
9	4	9.69924	1.77296	1	187	257	177	187	16.6992
9	4	7.00538	2.76178	3	275	315	205	205	32.0054
9	4	2.03624	2.05036	3	182	272	282	282	104.036
9	4	10.439	3.06065	1	156	206	96	156	145.561
9	4	7.44275	2.76344	1	165	105	235	165	157.557
9	4	1.76829	1.96027	3	235	225	215	215	33.2317
9	4	5.2397	1.96095	1	223	103	63	223	48.2397
9	4	4.74467	2.60942	2	168	148	138	148	152.745
9	4	4	1.09886	1	274	224	264	274	90
9	4	15.0935	2.05055	2	279	229	239	229	64.0935
9	4	9.85521	1.99679	2	200	260	240	260	70.1448
9	4	1.51399	3.5223	3	177	167	87	87	85.486
9	4	11.0679	2.37073	2	201	101	91	101	112.068
9	4	23.9042	1.96698	2	69	149	59	149	125.096
9	4	4.74488	2.13995	2	135	25	55	25	29.7449
9	4	0.689369	2.70415	2	151	191	231	191	11.6894
9	4	20.1467	2.59972	3	223	203	163	163	142.853
9	4	2.55997	3.4734	1	68	78	88	68	70.56
9	4	7.66091	2.18017	3	180	160	200	200	12.3391
9	4	11.6995	1.97316	1	106	236	136	106	117.699
9	4	2.61986	1.82593	1	245	295	175	245	67.6199
9	4	6.09349	2.34002	2	243	193	233	193	19.0935
9	4	4.31121	2.47243	2	51	211	71	211	35.3112
9	4	2.31063	2.32297	1	194	114	84	194	11.6894
9	4	6.46554	2.9431	3	166	176	156	156	149.534
9	4	21.9454	3.53131	3	76	66	186	186	164.055
9	4	3.78897	2.09191	3	123	113	93	93	96.789
9	5	13.1113	2.54932	2	230	200	280	200	33.1113
9	5	10.6107	2.34211	1	61	101	131	61	50.3893
9	5	5.63251	2.20247	3	294	344	224	224	38.3675
9	5	6.19859	2.55616	1	152	132	142	152	158.199
9	5	0.571307	1.81246	2	166	246	256	246	66.5713
9	5	3.19749	2.66603	3	146	136	296	296	119.197
9	5	1.35775	3.38474	2	183	343	313	343	164.358
9	5	19.1957	2.55372	2	197	257	177	257	57.8043
9	5	20.9831	2.45849	1	314	224	234	314	154.983
9	5	19.8699	2.66565	1	107	67	7	107	126.87
9	5	7.8787	2.35237	3	215	245	145	145	152.879
9	5	40.3474	2.00032	2	228	278	308	278	57.6526
9	5	19.029	1.98589	3	215	195	155	155	135.971
9	5	12.8108	2.0509	3	104	214	164	164	151.189
9	5	3.45371	2.23717	1	145	105	5	145	141.546
9	5	79.9144	1.90753	1	141	51	201	141	40.9144
9	5	34.9987	1.90722	1	93	163	223	93	127.999
9	5	88.7098	2.65083	2	113	143	23	143	51.7098
9	5	15.8245	1.74102	3	189	239	199	199	34.8245
9	5	8.35556	2.34565	2	295	165	305	165	156.644
9	5	89.9694	2.01393	1	213	113	193	213	122.969
9	5	16.6028	1.97969	2	263	243	303	243	46.3972
9	5	7	2.30883	2	258	308	298	308	135
9	5	4.19443	2.14838	1	224	234	254	224	39.8056
9	5	23.2737	1.84118	2	239	289	199	289	132.274
9	5	17.1148	2.33487	3	282	192	172	172	154.885
9	5	36.2645	2.22292	1	113	103	133	113	149.265
9	5	12	2.44096	3	187	277	327	327	135
9	5	5.43495	1.59113	3	72	142	32	32	26.5651
9	5	9.28941	1.50041	3	260	210	300	300	129.289
9	6	17.7751	2.77753	2	273	263	233	263	65.2249
9	6	1.61478	2.11428	2	155	115	205	115	113.385
9	6	12.5741	1.88208	2	230	110	250	110	122.574
9	6	5.0546	1.82506	1	114	94	134	114	119.055
9	6	2.81407	2.81907	3	241	161	181	181	3.81407
9	6	3.29331	2.28905	3	199	129	219	219	35.7067
9	6	12.2749	2.26793	3	241	221	111	111	123.275
9	6	4.09523	3.06649	2	269	209	249	209	24.9048
9	6	34.2461	2.08122	1	250	140	200	250	35.7539
9	6	27.9697	2.92039	1	248	198	118	248	40.0303
9	6	26.0888	1.88419	3	112	12	102	102	128.089
9	6	2.52886	2.37149	1	236	246	136	236	53.4711
9	6	14.9831	1.52813	2	135	85	75	85	70.0169
9	6	10.5651	1.56034	1	196	236	256	196	26.5651
9	6	6.0546	2.34467	3	32	172	22	22	15.9454
9	6	6.86581	3.52512	3	103	143	183	183	9.86581
9	6	23.9625	1.79294	2	205	225	85	225	21.0375
9	6	44.9264	2.15053	2	104	164	14	164	28.9264
9	6	20.5651	2.43458	3	196	146	96	96	116.565
9	6	1.55605	2.00807	1	296	236	176	296	114.444
9	6	9	1.81034	1	144	224	194	144	135
9	6	4.95837	1.68809	1	231	131	91	231	46.0416
9	6	10.9869	1.7432	2	179	119	219	119	129.987
9	6	28.4744	3.94781	3	266	216	316	316	107.526
9	6	17.4759	2.19188	1	33	193	103	33	15.5241
9	6	37.3972	2.58899	2	41	81	191	81	43.6028
9	6	0.0273734	2.33035	3	294	264	324	324	143.973
9	6	0.642246	3.16234	1	195	215	255	195	15.6422
9	6	2.42957	3.4909	2	104	74	204	74	76.4296
9	6	6.30993	1.93018	3	70	110	220	220	33.6901
10	1	13.7683	4.72597	1	47	97	117	47	33.2317
10	1	52.054	8.74923	3	173	163	123	123	175.054
10	1	11.0128	3.24919	3	223	193	233	233	41.9872
10	1	59.9454	3.64346	1	89	219	69	89	29.0546
10	1	30.8624	2.73739	2	12	152	52	152	2.86241
10	1	13.6997	4.24165	2	263	163	283	163	149.3
10	1	65.1892	3.19155	2	194	274	164	274	28.8108
10	1	9.0506	2.86094	1	162	142	182	162	152.949
10	1	2.16235	4.04371	2	152	322	262	322	144.162
10	1	32.6325	2.98559	1	251	271	281	251	38.3675
10	1	34.9059	3.84716	1	142	92	172	142	176.906
10	1	6.7185	3.50113	3	116	286	156	156	162.719
10	1	10.009	4.64851	2	174	184	244	184	173.991
10	1	40.9795	4.90693	1	193	163	233	193	152.021
10	1	18	1.13831	3	142	192	252	252	90
10	1	45.8937	2.64302	2	198	258	308	258	32.1063
10	1	10.6761	5.41713	3	192	232	142	142	152.676
10	1	3.52057	5.60679	1	161	131	71	161	157.479
10	1	61.3895	4.1362	3	170	250	90	90	151.39
10	1	15.7701	4.10461	3	215	135	205	205	9.22989
10	1	70.0834	4.13578	2	172	232	132	232	161.917
10	1	32.9831	4.57128	1	167	297	267	167	19.9831
10	1	33.2643	4.58417	3	125	175	35	35	1.7357
10	1	18.9108	3.61714	1	119	129	69	119	137.911
10	1	38.4915	5.57469	2	147	107	137	107	145.491
10	1	31.9314	4.72767	1	62	162	82	62	30.0686
10	1	13.1986	8.2477	2	75	35	85	35	21.8014
10	1	2.21103	4.46579	3	224	334	324	324	141.789
10	1	2.39293	3.51225	3	199	209	219	219	36.6071
10	1	89.2544	4.02402	2	141	231	101	231	141.746
10	2	6.03751	6.59971	2	160	210	80	210	23.9625
10	2	62.7432	2.82497	2	328	208	278	208	145.257
10	2	83.7595	6.39498	1	128	178	118	128	31.7595
10	2	2.61149	3.48023	2	184	144	154	144	146.611
10	2	34.9744	3.11913	1	261	281	271	261	115.974
10	2	12.0906	6.86712	1	167	177	187	167	179.091
10	2	80.7029	3.81745	1	271	191	261	271	171.703
10	2	58.7559	2.72717	1	249	179	269	249	10.2441
10	2	18.5528	2.22301	3	76	136	36	36	17.4472
10	2	20.8973	4.38525	3	113	103	173	173	152.103
10	2	11.9786	4.25018	2	319	149	259	149	137.021
10	2	11.8973	3.05255	3	149	69	29	29	17.1027
10	2	49.4349	2.71891	2	106	76	26	76	26.5651
10	2	10.1301	2.51472	3	78	168	88	88	98.1301
10	2	13	3.09813	2	308	328	228	328	135
10	2	3.9494	2.82173	3	79	179	149	149	152.949
10	2	38.7436	3.31964	3	66	186	156	156	14.7436
10	2	30.1786	3.14722	3	312	252	272	272	61.8214
10	2	37.9097	4.91976	1	272	232	122	272	54.0903
10	2	12.6901	2.82747	1	201	291	241	201	33.6901
10	2	15.7004	3.98948	2	133	223	253	223	27.2996
10	2	7.59258	3.46669	3	205	175	335	335	147.407
10	2	3.30485	6.83701	1	142	152	252	142	145.305
10	2	49.3447	2.65103	2	55	85	115	85	35.6553
10	2	22.3785	2.38149	3	71	31	161	161	138.621
10	2	25.2933	2.64665	3	141	151	61	61	35.7067
10	2	12.5085	4.69713	2	192	202	122	202	34.5085
10	2	21.359	4.66014	2	177	47	167	47	25.641
10	2	16.9097	2.4909	1	199	219	259	199	35.9097
10	2	55	3.77379	1	80	140	70	80	135
10	3	16.7252	4.28518	1	151	141	121	151	134.275
10	3	5.7274	2.67644	1	150	70	240	150	144.273
10	3	5.18593	2.92748	1	216	206	266	216	41.1859
10	3	15.3987	3.14346	2	156	236	136	236	40.6013
10	3	28.4915	4.18795	3	223	153	243	243	34.5085
10	3	2.42608	4.20891	3	58	88	128	128	130.426
10	3	29.953	3.28232	1	248	258	198	248	38.047
10	3	20.0251	2.12139	3	33	103	113	113	133.025
10	3	80.7546	2.6053	1	217	157	327	217	136.245
10	3	70.1497	4.77491	2	67	137	167	137	27.1497
10	3	2	3.08772	1	178	198	218	178	0
10	3	40.5275	4.63872	2	110	100	170	100	140.528
10	3	56.0169	2.34467	1	284	194	174	284	160.017
10	3	49.7652	2.41277	2	187	267	217	267	37.2348
10	3	2.14554	5.10718	1	203	93	173	203	20.8545
10	3	0.645975	2.51428	3	277	167	207	207	27.646
10	3	12.8787	1.84569	3	80	100	130	130	117.121
10	3	12.6052	3.66401	3	198	248	318	318	125.395
10	3	89.1481	2.14269	3	140	230	60	60	150.852
10	3	21.1985	4.75471	1	184	284	224	184	162.801
10	3	4.52321	3.33156	1	154	44	164	154	158.523
10	3	7.44395	3.44346	3	18	138	28	28	20.556
10	3	18.5297	4.97769	2	167	147	277	147	165.53
10	3	11.6888	2.95468	2	188	178	228	178	9.68879
10	3	24.2176	4.57922	3	159	249	169	169	144.782
10	3	20.6013	3.20407	2	150	290	230	290	130.601
10	3	10.7441	3.10155	3	110	180	190	190	179.256
10	3	28.0284	3.41676	2	194	204	254	204	52.0284
10	3	66.0856	3.54257	2	273	253	153	253	139.086
10	3	69.9097	2.67487	2	114	214	144	214	144.09
10	4	33.4099	4.06251	1	193	243	223	193	159.59
10	4	35.7995	2.43029	3	243	253	183	183	147.2
10	4	9.90651	3.87636	1	196	266	316	196	25.9065
10	4	33.134	4.99126	3	145	65	155	155	121.866
10	4	14.0605	2.79622	2	84	94	104	94	108.06
10	4	25.7108	1.79795	2	206	106	166	106	131.711
10	4	1.96279	2.13539	1	158	208	98	158	159.963
10	4	26.8989	1.30336	3	297	237	267	267	60.1011
10	4	39.3402	1.87131	1	102	62	192	102	141.34
10	4	28.2914	4.8981	2	41	1	161	1	29.2914
10	4	51.5035	2.91735	2	253	273	173	273	41.4965
10	4	58.6538	1.94503	3	184	204	264	264	25.3462
10	4	44.3925	2.0617	3	174	74	104	104	148.392
10	4	31.0124	1.88455	2	194	314	174	314	165.012
10	4	16.7321	1.71539	1	145	105	115	145	161.732
10	4	25.4429	2.96731	3	217	177	267	267	61.5571
10	4	55.8141	3.91609	2	127	187	217	187	131.186
10	4	77.0089	2.75175	1	234	184	124	234	156.991
10	4	0.0230302	2.10443	3	189	209	179	179	178.977
10	4	9.83765	1.87189	1	154	164	304	154	144.162
10	4	73.3675	3.61112	3	75	95	125	125	51.6325
10	4	26.3665	5.92056	1	202	132	142	202	48.3665
10	4	32.1113	2.20435	1	181	31	21	181	33.1113
10	4	0.744881	1.92978	2	239	209	289	209	29.7449
10	4	19.6667	1.57759	2	200	170	210	170	150.333
10	4	12.3665	2.1305	1	126	166	226	126	138.366
10	4	73.5926	1.55476	2	141	221	111	221	147.407
10	4	29	0.53942	3	171	31	61	61	90
10	4	7.81407	3.42031	2	169	319	229	319	131.186
10	4	2.76517	2.30571	3	210	310	230	230	52.7652
10	5	4.08359	3.43002	1	159	289	249	159	154.916
10	5	14.5651	2.8643	1	192	62	112	192	26.5651
10	5	89.7989	2.13078	1	290	250	230	290	19.7989
10	5	7.99202	1.86656	3	327	287	297	297	124.992
10	5	3	1.88538	3	52	152	132	132	135
10	5	29.0362	3.98851	3	170	130	120	120	149.036
10	5	26.3099	2.43778	3	190	330	300	300	146.31
10	5	33.4725	2.02803	3	166	326	276	276	129.472
10	5	0.935673	2.92615	1	268	258	248	268	87.0643
10	5	2.12502	3.13355	1	175	225	195	175	172.875
10	5	16.5924	1.92603	3	221	191	181	181	17.5924
10	5	0.559965	3.2495	1	200	70	150	200	19.44
10	5	38.6992	2.65206	2	278	158	188	158	16.6992
10	5	42.5829	2.71009	2	292	282	302	282	144.583
10	5	37.3141	3.22204	3	143	173	93	93	130.314
10	5	12.4403	5.50387	2	218	128	198	128	140.44
10	5	5.17234	2.3273	2	74	144	34	144	149.172
10	5	7.90594	2.30323	2	324	304	284	304	131.906
10	5	29.5597	3.72729	2	210	170	100	170	140.44
10	5	43.2457	2.19088	2	239	139	229	139	2.24574
10	5	22.4957	2.06853	1	306	266	286	306	148.496
10	5	36.5704	4.61521	2	182	112	72	112	148.57
10	5	23.6764	2.14103	3	332	312	282	282	125.676
10	5	1.2026	3.68897	3	121	61	181	181	2.2026
10	5	33.5308	2.37642	2	40	70	90	70	36.4692
10	5	24.7662	2.63313	3	97	127	117	117	141.766
10	5	7.13419	2.82367	1	28	78	38	28	35.1342
10	5	19.1676	3.06545	1	325	185	195	325	164.168
10	5	69.8845	4.81611	2	261	121	161	121	51.1155
10	5	48.8428	2.99346	1	267	157	147	267	38.1572
10	6	0.799531	1.68036	3	128	228	148	148	147.2
10	6	32.4622	3.89546	3	118	208	98	98	130.462
10	6	12.3402	2.10704	2	109	129	139	129	141.34
10	6	5.15239	2.27018	1	218	118	258	218	43.1524
10	6	58.5946	4.04133	2	196	96	236	96	37.4054
10	6	8.15494	3.15931	2	186	176	136	176	167.845
10	6	16.1221	2.51995	2	222	122	272	122	138.122
10	6	34.9487	1.73974	3	138	168	58	58	23.0513
10	6	17.7236	1.76	3	156	286	166	166	148.276
10	6	25.6507	1.7846	1	153	193	73	153	127.349
10	6	32.3099	1.89343	1	114	224	204	114	146.31
10	6	17.7106	3.5609	3	163	243	303	303	140.711
10	6	30.1448	2.00134	2	220	130	120	130	160.145
10	6	8.03086	1.81068	1	206	256	166	206	17.9691
10	6	19.6192	2.13653	1	167	237	77	167	147.381
10	6	24.1301	1.97637	3	191	271	241	241	36.8699
10	6	24.4612	2.26574	2	174	234	214	234	29.5388
10	6	47.2312	4.20841	3	140	290	270	270	137.231
10	6	17.3801	1.93777	1	220	260	130	220	22.6199
10	6	51.6197	2.58965	1	274	304	264	274	145.62
10	6	82.8069	2.89078	1	262	172	132	262	179.193
10	6	8.48955	1.96195	3	179	149	129	129	137.49
10	6	27.9726	2.51802	3	194	284	244	244	36.0274
10	6	54.5651	5.46618	2	172	152	142	152	26.5651
10	6	4.06858	2.31249	2	234	154	254	154	149.931
10	6	57.4428	1.94433	1	215	115	185	215	157.557
10	6	22.9831	2.01286	2	163	183	153	183	160.017
10	6	69.4111	2.05424	3	1	71	141	141	30.4111
10	6	24.0091	2.20854	2	167	197	147	197	41.0091
10	6	26.0184	3.88206	1	94	194	44	94	120.018
11	1	54.8973	9.97638	1	63	133	203	63	117.897
11	1	51.875	7.713	3	251	161	211	211	82.875
11	1	27.3099	5.63276	1	151	51	201	151	123.69
11	1	61.0037	24.2824	2	198	168	238	168	106.996
11	1	11.1481	4.1449	2	238	108	198	108	119.148
11	1	11.3764	2.70092	3	66	106	126	126	114.624
11	1	17.0131	3.23236	1	213	163	253	213	50.0131
11	1	15.8658	2.73065	3	281	221	321	321	125.134
11	1	31.2142	3.22638	1	162	192	152	162	130.786
11	1	22.3439	3.052	3	69	189	239	239	36.6561
11	1	6.90458	4.0627	3	183	143	33	33	26.0954
11	1	26.9421	3.38917	2	19	99	29	99	125.942
11	1	23.9765	3.57841	2	230	280	150	280	123.977
11	1	2.58294	3.05141	3	98	228	218	218	35.4171
11	1	2.38851	5.86209	2	209	239	169	239	56.6115
11	1	13.395	3.62838	1	32	12	42	32	18.605
11	1	40.8139	4.54283	3	125	95	255	255	34.1861
11	1	4.8696	3.73049	3	274	194	314	314	129.13
11	1	18.1572	3.69048	1	200	230	290	200	38.1572
11	1	42.2005	5.73775	3	305	235	165	165	122.8
11	1	11.93	5.17765	2	51	211	131	211	42.93
11	1	4.53918	5.41052	1	264	194	214	264	79.4608
11	1	13.2749	4.00787	1	160	90	170	160	146.725
11	1	49.3141	6.92166	2	209	189	279	189	139.686
11	1	18.859	3.31721	1	101	111	191	101	119.859
11	1	5.61986	3.70507	2	263	253	283	253	67.3801
11	1	5.43495	4.07269	1	283	193	233	283	108.435
11	1	0.969741	5.72378	2	101	41	1	41	40.0303
11	1	4	3.5351	3	111	121	131	131	135
11	1	10.5571	4.23113	2	194	264	244	264	73.4429
11	2	28.124	3.36912	1	148	58	118	148	119.876
11	2	7.78415	5.39017	3	123	153	113	113	120.784
11	2	54.134	5.6273	3	194	144	184	184	58.134
11	2	15.8699	3.75709	2	139	69	209	69	53.1301
11	2	55.9246	5.74173	2	22	172	132	172	116.075
11	2	22.1193	3.8255	3	226	116	76	76	53.8807
11	2	6.09828	4.10741	1	120	220	70	120	126.098
11	2	26.2551	8.08316	2	209	79	219	79	105.255
11	2	7.04094	2.99405	1	131	211	221	131	123.959
11	2	43.6952	7.67136	2	299	279	309	279	55.3048
11	2	21.4472	2.99404	1	319	249	199	319	117.553
11	2	2.15239	3.83922	2	269	229	259	229	46.8476
11	2	0.0771953	3.70148	3	226	216	236	236	55.9228
11	2	16.8863	5.00082	2	157	137	247	137	120.114
11	2	43.7652	9.64214	3	289	169	189	189	145.235
11	2	0.224859	4.46395	1	205	245	195	205	24.7751
11	2	4.82745	3.37836	3	57	107	27	27	31.8274
11	2	28.5686	4.12334	1	99	209	239	99	127.569
11	2	9.54306	4.67912	2	303	193	203	193	22.5431
11	2	19.5829	5.2777	1	235	205	145	235	35.4171
11	2	19.4077	5.08048	1	234	194	264	234	34.5923
11	2	15.1944	6.5436	2	35	55	105	55	39.8056
11	2	1.38076	3.45967	3	194	114	214	214	32.6192
11	2	1.76883	3.96238	2	109	49	169	49	47.2312
11	2	52.9191	3.71427	3	159	149	279	279	46.0809
11	2	16.3864	3.17816	3	22	92	172	172	155.614
11	2	12.5829	3.29114	3	68	98	48	48	35.4171
11	2	13.3518	4.3467	1	154	124	164	154	140.648
11	2	1.91438	4.22614	2	131	141	231	141	139.086
11	2	38.5226	3.7643	1	89	199	149	89	50.4774
11	3	3.4688	11.3997	1	178	198	168	178	1.4688
11	3	0.237446	3.20082	1	118	58	18	118	118.237
11	3	23.0362	4.37825	1	171	131	151	171	14.0362
11	3	1.03624	2.40299	3	282	252	302	302	120.964
11	3	31.8428	8.62863	2	230	70	100	70	38.1572
11	3	23.5651	6.16646	1	273	193	263	273	116.565
11	3	32.6215	3.45083	2	224	164	244	164	131.379
11	3	25.5482	2.8616	1	249	259	199	249	43.4518
11	3	26.0214	2.94809	2	219	159	129	159	132.979
11	3	20.5377	3.63248	1	285	225	255	285	125.538
11	3	5.86581	6.23439	3	51	31	41	41	35.1342
11	3	9.51399	3.24041	3	250	170	140	140	130.486
11	3	26.1986	3.74611	2	213	183	283	183	156.801
11	3	2.63658	2.79053	3	104	54	44	44	46.6366
11	3	17.9435	3.33159	1	325	245	195	325	127.057
11	3	27.7094	3.42004	3	175	235	165	165	137.291
11	3	22.1572	3.60934	1	196	96	156	196	38.1572
11	3	12.991	4.79122	2	236	296	256	296	128.991
11	3	29.7559	4.35613	2	215	175	155	175	145.244
11	3	6.30993	5.27692	3	235	125	185	185	11.3099
11	3	1.59066	4.12742	2	174	134	64	134	135.591
11	3	16.1859	3.11197	3	235	155	115	115	131.186
11	3	0.427802	4.23135	1	141	101	221	141	140.572
11	3	25.7153	3.90526	1	67	27	157	67	41.2847
11	3	3.21009	3.51274	3	190	250	220	220	43.2101
11	3	47.29	7.92821	3	78	158	118	118	70.71
11	3	38.0131	5.43214	2	132	192	262	192	50.0131
11	3	12.6075	8.23397	2	221	71	131	71	58.3925
11	3	14.8403	4.66389	2	79	49	39	49	34.1597
11	3	5.96376	2.81422	3	95	125	115	115	120.964
11	4	12.0546	6.7672	2	162	152	102	152	164.055
11	4	28.3578	6.42384	3	41	71	91	91	119.358
11	4	13.5085	2.97391	1	249	199	169	249	55.4915
11	4	23.6121	4.17494	1	311	161	201	311	154.612
11	4	13.0184	7.10415	3	193	183	43	43	29.9816
11	4	8.92464	3.46705	3	250	260	170	170	161.075
11	4	22.2155	3.3382	1	116	286	176	116	138.215
11	4	29.5348	3.15421	1	272	222	132	272	121.535
11	4	14.7989	5.21036	3	130	160	140	140	154.799
11	4	20.8534	3.36837	2	322	252	332	252	51.1466
11	4	27.3785	3.76484	3	154	244	284	284	131.379
11	4	4.59012	3.14574	3	235	265	205	205	20.4099
11	4	70.5345	2.93377	2	231	191	271	191	120.466
11	4	15.3257	3.07	1	142	122	102	142	126.674
11	4	45.2858	4.12903	3	158	88	98	98	143.286
11	4	12.6405	7.44913	3	43	113	173	173	5.64055
11	4	15.5792	4.03515	2	165	255	175	255	59.4208
11	4	21.3478	4.49745	2	170	250	200	250	48.6522
11	4	1.56505	6.65321	1	245	185	235	245	63.4349
11	4	14.9921	4.31103	1	148	178	138	148	162.992
11	4	22.1659	4.4864	1	290	250	240	290	132.166
11	4	41.725	3.26922	1	184	104	144	184	142.275
11	4	11.9575	2.25645	1	62	162	72	62	50.0425
11	4	33.5275	3.5389	3	173	243	253	253	39.4725
11	4	2.3925	3.33873	2	71	191	141	191	13.3925
11	4	5.67686	2.77885	2	301	341	231	341	155.323
11	4	8.87599	3.65164	2	81	21	11	21	29.876
11	4	40.1048	5.96215	2	191	251	111	251	111.105
11	4	1.9423	5.66666	3	151	241	201	201	19.0577
11	4	0.939528	3.45694	2	316	206	296	206	26.9395
11	5	0.954841	3.12458	3	245	255	315	315	135.955
11	5	22.6148	3.76061	1	269	249	329	269	111.615
11	5	19.6806	2.7852	3	273	153	283	283	122.681
11	5	8.9454	4.07835	1	187	67	107	187	15.9454
11	5	28.3099	4.8815	2	262	332	232	332	123.69
11	5	0.249033	4.35235	1	304	234	214	304	124.249
11	5	19.4986	4.34483	1	274	244	194	274	113.499
11	5	11.1524	5.6932	2	208	148	198	148	136.848
11	5	6.8193	4.86419	1	183	163	213	183	9.8193
11	5	17.8014	3.99077	2	146	176	196	176	158.199
11	5	38.9421	4.16402	3	183	243	273	273	54.0579
11	5	16.514	2.48066	3	297	257	237	237	40.486
11	5	29.9041	3.00803	1	171	161	261	171	141.096
11	5	28.6761	3.55325	3	96	156	236	236	27.3239
11	5	23.5297	3.51395	1	173	83	143	173	149.47
11	5	2.89727	5.96144	2	210	250	300	250	72.8973
11	5	19.192	4.24957	2	269	159	199	159	139.808
11	5	7.42697	3.77993	2	56	136	126	136	143.427
11	5	27.7559	3.28528	3	237	267	277	277	124.756
11	5	6.8699	5.24449	1	150	210	110	150	143.13
11	5	15.556	4.98639	2	145	275	235	275	110.556
11	5	23.6981	3.43968	2	182	162	172	162	138.302
11	5	20.6366	2.81342	1	64	84	134	64	43.3634
11	5	29.9392	3.82751	2	194	254	304	254	44.0608
11	5	8.80557	5.00526	3	151	11	31	31	39.8056
11	5	20.4258	5.78264	3	95	185	215	215	14.5742
11	5	16.6504	3.63954	3	102	192	132	132	148.65
11	5	21.3758	4.18962	1	164	264	244	164	142.624
11	5	27.5741	3.97101	3	310	290	230	230	22.4259
11	5	23.6002	3.90745	2	136	236	256	236	32.3998
11	6	34.1186	3.56708	1	260	270	250	260	45.8814
11	6	7.52077	4.45985	2	119	129	199	129	136.521
11	6	32.1597	11.2425	2	218	178	158	178	145.84
11	6	18.9072	7.45627	2	189	169	139	169	7.90716
11	6	8.78264	5.07838	3	243	133	143	143	151.783
11	6	45.888	3.9531	1	81	141	221	81	35.112
11	6	21.879	6.40976	2	194	134	74	134	155.879
11	6	16.9946	7.50666	2	1	131	91	131	147.995
11	6	3.84239	4.58641	1	201	121	211	201	24.8424
11	6	12.1148	6.07158	2	122	212	172	212	19.8852
11	6	39.5345	5.02647	3	250	280	110	110	149.534
11	6	32.3925	5.68416	3	56	96	116	116	148.392
11	6	36.8924	3.05885	1	105	135	145	105	141.892
11	6	11.2257	5.21839	2	108	118	128	118	129.226
11	6	9.14496	2.91938	1	129	209	179	129	138.145
11	6	7.66314	3.22716	1	209	139	149	209	21.3369
11	6	32.8767	3.94916	3	61	221	101	101	133.877
11	6	25.6713	4.0853	3	137	207	237	237	31.3287
11	6	26.3302	4.43633	1	172	252	232	172	145.67
11	6	1.77492	3.72215	2	230	200	120	200	18.2251
11	6	15.9314	4.39825	1	179	259	339	179	14.9314
11	6	9.59114	4.48727	2	282	172	302	172	1.59114
11	6	22.4328	4.05461	2	247	227	277	227	24.5672
11	6	13.2289	4.36102	3	88	108	178	178	11.2289
11	6	12.3501	2.92164	3	87	157	177	177	164.65
11	6	1.40536	3.12534	3	69	209	189	189	7.59464
11	6	1.51587	3.31308	1	198	258	188	198	19.5159
11	6	11.1376	3.14477	3	189	169	149	149	137.862
11	6	40.7683	4.94101	3	296	146	286	286	146.768
11	6	11.8691	4.29723	1	229	249	129	229	37.1309
12	1	7.93567	4.86645	1	265	115	145	265	92.9357
12	1	20	0.857063	3	220	110	70	70	90
12	1	71.5679	4.17388	3	193	323	343	343	91.4321
12	1	17.2157	12.3288	1	163	233	113	163	145.784
12	1	4.22043	58.3764	3	106	26	146	146	141.78
12	1	33.0131	23.1309	3	227	187	287	287	140.013
12	1	48.9144	18.4744	3	98	218	188	188	139.086
12	1	22.1888	5.93252	1	148	188	118	148	125.811
12	1	3.50744	13.7404	1	137	167	277	137	133.493
12	1	3.45331	33.3123	2	185	165	155	165	168.453
12	1	8.2602	3.6783	3	92	152	82	82	73.7398
12	1	72.3231	14.8972	1	83	173	23	83	155.323
12	1	64.4623	36.3966	2	165	325	175	325	80.5377
12	1	20.7989	4.16807	2	221	91	211	91	70.2011
12	1	8.53768	5.76492	2	313	153	233	153	144.462
12	1	77.1213	3.9854	1	265	315	185	265	162.121
12	1	80.2538	42.3702	2	261	181	141	181	81.2538
12	1	18.6847	7.98176	3	102	232	242	242	43.3153
12	1	70.3257	12.5262	1	197	137	177	197	126.674
[truncated: 3,761 more rows]
