# Supplementary material for: A mechanistic insight into sources of error of visual working memory in multiple sclerosis
Source: eLife. 2023 Nov 8;12:RP87442. doi: 10.7554/eLife.87442 (PMC10631758; doi:10.7554/eLife.87442)
Supplement: Source data 3. [file elife-87442-data3.xlsx]

## Sheet: Healthy
Subject_ID	Block_ID	Response_Error (degree)	Reaction_Time (seconds)	Target_Bar	Bar_1_Orientation (degree)	Target_Bar_Orientation (degree)	Subject_Response_Orientation (degree)
1	7	6.55281	5.04749	1	201	201	27.5528
1	7	2.3141	1.74884	1	52	52	49.6859
1	7	2.97041	2.74457	1	196	196	18.9704
1	7	8.24146	2.26874	1	306	306	117.759
1	7	9.81079	1.64712	1	289	289	118.811
1	7	26.4915	2.145	1	209	209	55.4915
1	7	7.17255	1.4209	1	129	129	121.827
1	7	8.51399	2.29045	1	94	94	85.486
1	7	7.09284	2.04921	1	285	285	97.9072
1	7	1.71085	2.38722	1	276	276	94.2892
1	7	0.82017	2.34416	1	184	184	3.17983
1	7	4.28688	2.2682	1	300	300	124.287
1	7	1.29016	2.59008	1	188	188	6.70984
1	7	8.99099	2.835	1	60	60	51.009
1	7	0.113418	1.77688	1	241	241	61.1134
1	7	6.96376	1.50905	1	246	246	59.0362
1	7	0.38954	1.76467	1	286	286	106.39
1	7	1.74616	1.97712	1	83	83	81.2538
1	7	0.24052	2.04965	1	283	283	103.241
1	7	1.42608	1.7954	1	51	51	49.5739
1	7	8.25644	1.63235	1	22	22	30.2564
1	7	8.44719	1.73025	1	216	216	27.5528
1	7	3.1301	2.18606	1	175	175	171.87
1	7	5.30455	2.89477	1	19	19	24.3045
1	7	8.38954	1.53791	1	143	143	151.39
1	7	9.70864	1.50924	1	264	264	74.2914
1	7	6	2.86043	1	186	186	0
1	7	0.00538321	1.73076	1	212	212	32.0054
1	7	2.93151	1.29046	1	117	117	119.932
1	7	3.00354	1.73315	1	262	262	78.9965
2	7	5.49564	12.6802	1	67	67	61.5044
2	7	0.434949	5.20643	1	117	117	116.565
2	7	2.90716	2.14721	1	40	40	37.0928
2	7	2.80141	3.2071	1	161	161	158.199
2	7	18.9946	4.19998	1	231	231	32.0054
2	7	23.1193	4.23337	1	257	257	53.8807
2	7	5.52057	3.167	1	107	107	112.521
2	7	21.4518	1.61133	1	248	248	46.5482
2	7	0	3.37674	1	90	90	90
2	7	4.85142	6.76131	1	189	189	13.8514
2	7	21.5231	4.19332	1	173	173	151.477
2	7	57.3563	7.62195	1	302	302	179.356
2	7	22.7751	3.67942	1	178	178	155.225
2	7	3.76517	4.10591	1	176	176	172.235
2	7	13.7816	3.8806	1	135	135	148.782
2	7	18.5924	4.39109	1	134	134	152.592
2	7	19.4915	2.8761	1	306	306	145.491
2	7	3.07249	4.0147	1	200	200	16.9275
2	7	10.7363	3.87567	1	93	93	103.736
2	7	1.03624	2.54238	1	212	212	30.9638
2	7	26.0362	2.69822	1	168	168	14.0362
2	7	6.78725	2.26124	1	295	295	121.787
2	7	28.8863	3.25161	1	149	149	120.114
2	7	2.80679	2.22169	1	129	129	126.193
2	7	44.444	4.31109	1	155	155	110.556
2	7	26	0.878061	1	244	244	90
2	7	20.2726	2.70927	1	146	146	125.727
2	7	13.0565	2.54807	1	156	156	142.943
2	7	2.99202	3.30468	1	212	212	34.992
2	7	14.6745	2.83142	1	146	146	131.326
3	7	55.7295	10.7991	1	284	284	48.2705
3	7	9.11934	1.17023	1	153	153	143.881
3	7	9.12472	1.36709	1	258	258	68.8753
3	7	3.20011	1.12336	1	202	202	18.7999
3	7	3.36393	1.70294	1	182	182	178.636
3	7	12.6013	2.15391	1	298	298	130.601
3	7	4.92711	2.88206	1	180	180	4.92711
3	7	16.5523	1.54137	1	277	277	113.552
3	7	17.1467	1.72468	1	155	155	172.147
3	7	2.03624	1.11902	1	213	213	30.9638
3	7	7.09476	1.7878	1	95	95	102.095
3	7	2.62938	1.16063	1	156	156	158.629
3	7	18.1213	1.24857	1	261	261	62.8787
3	7	19.6678	1.54706	1	204	204	43.6678
3	7	1.49647	1.57498	1	130	130	131.496
3	7	6.90651	1.23047	1	161	161	154.093
3	7	4.13364	1.16116	1	60	60	64.1336
3	7	0.24052	1.89743	1	77	77	76.7595
3	7	12.0251	1.18059	1	211	211	43.0251
3	7	2	1.23745	1	227	227	45
3	7	2.21009	1.2671	1	49	49	46.7899
3	7	10.6013	1.55306	1	150	150	139.399
3	7	8.26373	1.63363	1	157	157	148.736
3	7	0.115504	1.35132	1	141	141	141.116
3	7	1.46232	1.3277	1	172	172	170.538
3	7	4.89727	1.08737	1	247	247	62.1027
3	7	3.03624	1.07817	1	259	259	75.9638
3	7	18.9275	1.26445	1	200	200	38.9275
3	7	4.69007	1.41488	1	241	241	56.3099
3	7	6.04094	1.45238	1	265	265	78.9591
4	7	30.9575	4.89416	1	126	126	95.0425
4	7	12.1737	2.32092	1	27	27	39.1737
4	7	9.11134	2.21598	1	66	66	56.8887
4	7	1.00901	1.48534	1	140	140	141.009
4	7	2.31532	2.93221	1	176	176	178.315
4	7	6.7974	1.41994	1	144	144	137.203
4	7	12.9869	1.48095	1	243	243	50.0131
4	7	3.81889	1.62403	1	59	59	62.8189
4	7	2.09386	1.2736	1	127	127	129.094
4	7	11.029	1.02824	1	237	237	45.971
4	7	12.5704	1.40571	1	136	136	148.57
4	7	5.72556	1.63105	1	15	15	20.7256
4	7	12	1.71253	1	123	123	135
4	7	9.15969	2.15192	1	25	25	34.1597
4	7	2.75389	2.15976	1	168	168	170.754
4	7	6.99082	2.48816	1	325	325	151.991
4	7	22.1468	1.94318	1	221	221	18.8532
4	7	9.35402	1.35485	1	217	217	27.646
4	7	0.171458	1.61102	1	168	168	167.829
4	7	23.9094	1.40052	1	112	112	135.909
4	7	9.49573	1.66569	1	41	41	31.5043
4	7	1.43495	1.40803	1	208	208	26.5651
4	7	8.84761	1.59301	1	308	308	136.848
4	7	21.6914	1.25404	1	243	243	41.3086
4	7	10.9691	0.98408	1	263	263	72.0309
4	7	6.32361	1.76099	1	159	159	165.324
4	7	15.6769	1.11292	1	81	81	65.3231
4	7	7.88866	1.40064	1	274	274	101.889
4	7	6.72228	1.52914	1	122	122	115.278
4	7	3.82449	1.95307	1	166	166	169.824
5	7	9.35745	1.65873	1	303	303	132.357
5	7	2.61046	2.30885	1	206	206	28.6105
5	7	3.99462	1.96365	1	99	99	102.995
5	7	5.50143	1.62414	1	74	74	68.4986
5	7	7.08175	1.69812	1	304	304	131.082
5	7	0.914383	3.31669	1	185	185	4.08562
5	7	13.7094	1.37598	1	209	209	42.7094
5	7	2.38522	1.31291	1	249	249	66.6148
5	7	0.386043	3.19195	1	173	173	172.614
5	7	4.34744	1.67749	1	163	163	167.347
5	7	4.89777	3.16718	1	241	241	65.8978
5	7	3.12633	1.32372	1	154	154	157.126
5	7	1.56717	2.07927	1	247	247	65.4328
5	7	4.99082	1.78583	1	258	258	73.0092
5	7	1.97613	1.20306	1	145	145	146.976
5	7	0.565051	1.17985	1	199	199	18.4349
5	7	1.8477	1.09227	1	169	169	167.152
5	7	0.255328	1.07281	1	27	27	27.2553
5	7	21.4612	1.27406	1	129	129	150.461
5	7	6.23636	3.66067	1	169	169	175.236
5	7	0.407825	1.98011	1	168	168	168.408
5	7	0.920392	1.53933	1	186	186	5.07961
5	7	1.0772	1.15145	1	57	57	55.9228
5	7	13.4089	1.08382	1	300	300	133.409
5	7	4.08359	1.0742	1	159	159	154.916
5	7	5.53077	1.02869	1	87	87	81.4692
5	7	11.9112	2.01429	1	130	130	141.911
5	7	7.37625	1.13172	1	98	98	105.376
5	7	6.34071	1.24318	1	297	297	123.341
5	7	6.69007	0.905257	1	63	63	56.3099
6	7	5.9228	3.59185	1	230	230	55.9228
6	7	15.7559	1.96013	1	161	161	145.244
6	7	4.34019	2.14413	1	133	133	128.66
6	7	2.69545	1.36391	1	153	153	155.695
6	7	0.507675	2.62442	1	174	174	174.508
6	7	2.46227	2.33821	1	153	153	155.462
6	7	1.5198	4.35776	1	185	185	6.5198
6	7	1.34019	2.14148	1	220	220	38.6598
6	7	2.84217e-14	6.23364	1	225	225	45
6	7	0.301953	4.48741	1	89	89	88.698
6	7	0.962489	1.94209	1	157	157	156.038
6	7	2	2.73769	1	223	223	45
6	7	6.00416	3.3217	1	282	282	108.004
6	7	0.602562	4.27693	1	178	178	177.397
6	7	0.0753556	2.66353	1	289	289	108.925
6	7	4.57392	2.4699	1	225	225	49.5739
6	7	12.556	3.44025	1	172	172	159.444
6	7	7.82854	7.49774	1	205	205	32.8285
6	7	4.15723	2.23637	1	214	214	38.1572
6	7	7.47119	3.95436	1	245	245	57.5288
6	7	1.81407	7.48253	1	88	88	86.1859
6	7	20.4759	12.7772	1	99	99	119.476
6	7	5.62938	3.01701	1	72	72	66.3706
6	7	1.32453	5.03859	1	282	282	103.325
6	7	2.18593	4.00422	1	309	309	131.186
6	7	3.93059	8.37314	1	43	43	46.9306
6	7	1.77514	2.4975	1	22	22	20.2249
6	7	0.193489	5.63649	1	179	179	178.807
6	7	3.0546	1.5783	1	244	244	60.9454
6	7	6.21009	1.53886	1	127	127	133.21
7	7	6.34618	5.58534	1	161	161	154.654
7	7	4.16235	2.13685	1	275	275	99.1623
7	7	3.18111	2.05345	1	24	24	27.1811
7	7	4.1211	1.56747	1	133	133	137.121
7	7	5.32453	1.82797	1	172	172	166.675
7	7	6.03751	1.58949	1	150	150	156.038
7	7	6.62356	1.45812	1	207	207	20.3764
7	7	5.17255	1.70464	1	127	127	121.827
7	7	3	1.82446	1	42	42	45
7	7	0	2.43357	1	180	180	0
7	7	5.93151	1.1833	1	246	246	60.0685
7	7	5.72951	1.56805	1	144	144	138.27
7	7	6.5198	1.50048	1	135	135	141.52
7	7	6.39744	1.09556	1	126	126	132.397
7	7	2.87498	1.39432	1	170	170	172.875
7	7	5.76361	1.07139	1	235	235	49.2364
7	7	3.30993	1.83397	1	188	188	11.3099
7	7	11.9452	1.54394	1	127	127	138.945
7	7	7.98689	1.22758	1	122	122	129.987
7	7	6.76829	1.18936	1	230	230	56.7683
7	7	9.75117	1.06641	1	96	96	105.751
7	7	4.98311	2.02461	1	150	150	154.983
7	7	0.170175	1.88228	1	96	96	96.1702
7	7	14.6141	1.46501	1	118	118	132.614
7	7	2.37644	1.87136	1	252	252	69.6236
7	7	12.3008	1.0659	1	286	286	118.301
7	7	7	1.73636	1	142	142	135
7	7	9.02561	1.23193	1	215	215	25.9744
7	7	6.43495	1.38994	1	78	78	71.5651
7	7	16.9454	1.97119	1	134	134	150.945
8	7	7.65065	1.68024	1	225	225	52.6507
8	7	8.3925	1.88258	1	85	85	76.6075
8	7	5.44395	1.04916	1	244	244	69.444
8	7	10.7449	1.69183	1	161	161	150.255
8	7	2.29136	1.08269	1	243	243	60.7086
8	7	1.78264	0.896989	1	120	120	118.217
8	7	7.00416	1.03664	1	259	259	71.9958
8	7	5.09476	1.14586	1	83	83	77.9052
8	7	5.90477	1.24647	1	296	296	110.095
8	7	6.7843	1.824	1	94	94	100.784
8	7	3.04094	0.842561	1	262	262	78.9591
8	7	2.53077	1.33955	1	276	276	98.5308
8	7	7.25512	1.23199	1	307	307	119.745
8	7	12.56	2.32556	1	167	167	154.44
8	7	1.96249	1.1207	1	292	292	113.962
8	7	11.3763	1.06056	1	274	274	105.376
8	7	14.9559	1.49068	1	24	24	38.9559
8	7	0.241459	1.06564	1	62	62	62.2415
8	7	3	1.5119	1	228	228	45
8	7	7.79888	1.51151	1	168	168	160.201
8	7	20.6026	1.44634	1	297	297	137.603
8	7	1.64255	4.18454	1	179	179	177.357
8	7	10.1092	1.71297	1	228	228	58.1092
8	7	0.507436	2.32805	1	44	44	43.4926
8	7	12.8108	0.980974	1	106	106	118.811
8	7	3.98689	1.30937	1	126	126	129.987
8	7	3.18921	2.57225	1	238	238	61.1892
8	7	1.89909	3.09651	1	222	222	40.1009
8	7	1.34019	2.17156	1	265	265	83.6598
8	7	3.80141	2.76835	1	153	153	156.801
9	7	3.52411	3.50919	1	282	282	105.524
9	7	2.2184	0.448075	1	209	209	31.2184
9	7	4.25533	0.404494	1	203	203	27.2553
9	7	6.85331	3.58508	1	179	179	172.147
9	7	3.49148	0.417733	1	218	218	34.5085
9	7	13.9946	0.273935	1	226	226	32.0054
9	7	14.6425	3.43314	1	57	57	42.3575
9	7	6.55226	2.71061	1	208	208	21.4477
9	7	9.56505	0.358063	1	253	253	63.4349
9	7	6.70696	1.94373	1	173	173	166.293
9	7	1.7816	2.25155	1	213	213	31.2184
9	7	2.35238	1.93425	1	185	185	7.35238
9	7	8.41806	0.277474	1	240	240	51.5819
9	7	54	0.000601053	1	144	144	90
9	7	7	0.000782967	1	277	277	90
9	7	6.9454	2.34172	1	216	216	29.0546
9	7	3.1416	2.49745	1	155	155	151.858
9	7	0.0362435	1.66109	1	301	301	120.964
9	7	0.690068	1.88282	1	303	303	123.69
9	7	11.7512	1.13735	1	266	266	74.2488
9	7	8.09476	2.16933	1	184	184	12.0948
9	7	4.9454	2.17373	1	259	259	74.0546
9	7	6.43748	1.62632	1	86	86	79.5625
9	7	0.965714	1.96406	1	199	199	18.0343
9	7	12.0131	2.58399	1	128	128	140.013
9	7	3.75854	2.00089	1	204	204	27.7585
9	7	2.90445	3.28217	1	210	210	27.0956
9	7	6.49564	1.6964	1	292	292	118.496
9	7	4.73549	2.01984	1	296	296	120.735
9	7	1.00538	1.04998	1	59	59	57.9946
10	7	5.92751	5.44751	1	169	169	163.072
10	7	1.72436	2.21288	1	191	191	12.7244
10	7	6.69924	1.87401	1	170	170	163.301
10	7	4.43141	2.34072	1	312	312	127.569
10	7	4.35238	1.53651	1	267	267	82.6476
10	7	4.30076	1.68843	1	156	156	151.699
10	7	4.49573	2.23114	1	126	126	121.504
10	7	3.96376	2.65267	1	207	207	30.9638
10	7	1.59229	2.17452	1	237	237	55.4077
10	7	0.866357	1.29542	1	115	115	115.866
10	7	3.84181	2.33007	1	220	220	36.1582
10	7	4.71312	1.89794	1	96	96	100.713
10	7	1.69924	2.81288	1	195	195	16.6992
10	7	2.09386	2.73015	1	217	217	39.0939
10	7	5.88866	1.32992	1	84	84	78.1113
10	7	1.85316	2.15354	1	197	197	18.8532
10	7	0.531771	3.14586	1	184	184	3.46823
10	7	0.124998	2.11791	1	103	103	102.875
10	7	6.52881	1.62515	1	276	276	102.529
10	7	6.99462	1.86687	1	219	219	32.0054
10	7	6.59229	2.14498	1	118	118	124.592
10	7	3.34071	2.86925	1	210	210	33.3407
10	7	1.01279	2.74369	1	2	2	3.01279
10	7	3.61966	2.79537	1	83	83	79.3803
10	7	6.84181	2.47225	1	313	313	126.158
10	7	2.56505	2.54701	1	156	156	153.435
10	7	5.00538	2.21474	1	117	117	122.005
10	7	8.55707	3.29204	1	188	188	16.5571
10	7	1.30395	2.44709	1	189	189	7.69605
10	7	4.00798	2.63304	1	129	129	124.992
11	7	6.26477	4.82194	1	141	141	147.265
11	7	3.16126	2.41873	1	207	207	23.8387
11	7	13.7585	1.64464	1	166	166	152.241
11	7	1	1.3224	1	91	91	90
11	7	4.31121	1.62196	1	256	256	80.3112
11	7	3.28941	1.13524	1	279	279	95.7106
11	7	1.74616	1.55107	1	232	232	53.7462
11	7	20.211	1.4952	1	191	191	170.789
11	7	5.43141	1.33022	1	133	133	127.569
11	7	7.56377	1.01001	1	230	230	42.4362
11	7	11.1582	0.951366	1	295	295	126.158
11	7	2.43141	1.75961	1	220	220	37.5686
11	7	6.64225	1.81571	1	171	171	164.358
11	7	17.3499	0.917212	1	280	280	117.35
11	7	5.91908	2.3288	1	142	142	136.081
11	7	3.83365	1.12848	1	199	199	22.8337
11	7	0.981057	2.56836	1	174	174	173.019
11	7	9.99099	1.67635	1	164	164	173.991
11	7	8.84031	1.21513	1	317	317	145.84
11	7	3.47114	0.884756	1	130	130	126.529
11	7	3.18593	1.19529	1	187	187	3.81407
11	7	5.30993	3.16807	1	174	174	168.69
11	7	0.0127875	3.10863	1	87	87	86.9872
11	7	5.63754	1.09988	1	131	131	125.362
11	7	2.57303	1.19085	1	56	56	53.427
11	7	1.63251	1.57175	1	220	220	38.3675
11	7	5.9245	0.944189	1	75	75	69.0755
11	7	3.97493	0.868218	1	47	47	43.0251
11	7	1.90915	1.2985	1	135	135	136.909
11	7	15.9052	1.04114	1	73	73	57.0948
12	7	0.114473	1.94854	1	124	124	124.114
12	7	0.185925	3.42395	1	176	176	176.186
12	7	0.343249	1.85759	1	240	240	59.6568
12	7	3.25384	2.58402	1	123	123	126.254
12	7	6.46232	3.04843	1	273	273	99.4623
12	7	9.80557	2.14639	1	195	195	5.19443
12	7	5.79208	2.76651	1	92	92	97.7921
12	7	0.380345	1.76282	1	11	11	10.6197
12	7	8.27564	1.93495	1	156	156	147.724
12	7	4.29008	3.32698	1	179	179	174.71
12	7	3.47119	1.84615	1	151	151	147.529
12	7	6.76829	1.53612	1	95	95	101.768
12	7	5.21275	1.8879	1	307	307	121.787
12	7	0.0684731	2.16669	1	174	174	174.068
12	7	2.25944	2.87485	1	174	174	171.741
12	7	1.38034	2.63757	1	78	78	79.3803
12	7	4.77433	1.69147	1	226	226	50.7743
12	7	1.35698	5.15004	1	177	177	175.643
12	7	1.11686	3.85365	1	216	216	37.1169
12	7	2.36651	1.84759	1	83	83	80.6335
12	7	4.62901	2.56947	1	305	305	129.629
12	7	1.08092	2.82198	1	135	135	133.919
12	7	3.55634	2.01984	1	266	266	82.4437
12	7	0.638384	1.82103	1	254	254	74.6384
12	7	0.297145	2.28272	1	127	127	126.703
12	7	0.510447	5.96102	1	177	177	177.51
12	7	0.883854	2.40893	1	75	75	74.1161
12	7	8.98872	2.27798	1	149	149	157.989
12	7	4.26649	2.67248	1	229	229	44.7335
12	7	6.1363	1.97898	1	76	76	69.8637
13	7	20.1523	7.72541	1	258	258	57.8477
13	7	13.6952	5.67234	1	111	111	124.695
13	7	9.09476	2.23101	1	267	267	77.9052
13	7	0.863697	3.80849	1	204	204	24.8637
13	7	6.60707	2.90966	1	240	240	53.3929
13	7	21.2749	4.55647	1	102	102	123.275
13	7	6.93142	3.68435	1	262	262	75.0686
13	7	10.3929	3.20327	1	133	133	143.393
13	7	2.95097	2.62847	1	245	245	62.049
13	7	5.69515	1.72593	1	119	119	124.695
13	7	9.91487	3.08921	1	33	33	23.0851
13	7	14.0033	2.08028	1	213	213	18.9967
13	7	1.90811	2.13495	1	165	165	166.908
13	7	12.1022	1.75054	1	78	78	65.8978
13	7	3.94519	2.41424	1	315	315	138.945
13	7	0.676408	1.90765	1	55	55	54.3236
13	7	3.91825	2.09906	1	225	225	41.0818
13	7	11.7094	1.59787	1	239	239	47.2906
13	7	9.99491	4.07911	1	214	214	43.9949
13	7	2.17851	1.98558	1	149	149	146.821
13	7	5.31532	2.43425	1	218	218	43.3153
13	7	7.42077	2.2079	1	83	83	75.5792
13	7	9.74949	2.22487	1	149	149	158.749
13	7	4.59464	2.24265	1	93	93	97.5946
13	7	8.30993	2.84049	1	183	183	11.3099
13	7	6.74949	2.67831	1	152	152	158.749
13	7	2.30993	2.00881	1	216	216	33.6901
13	7	0.373005	2.11779	1	149	149	148.627
13	7	5.59228	2.24116	1	194	194	19.5923
13	7	7.57313	2.52714	1	192	192	19.5731
14	7	1.89727	1.64693	1	109	109	107.103
14	7	2.61986	1.66003	1	290	290	112.62
14	7	4.53177	1.86627	1	127	127	131.532
14	7	12.1466	1.34458	1	129	129	141.147
14	7	9.28559	1.75652	1	148	148	157.286
14	7	0.381395	1.04505	1	256	256	75.6186
14	7	3.51045	2.59894	1	84	84	87.5104
14	7	2.17018	1.47999	1	139	139	141.17
14	7	0.171458	1.93856	1	192	192	12.1715
14	7	5.03429	1.43426	1	193	193	18.0343
14	7	2.63251	2.3762	1	176	176	173.367
14	7	1.71059	1.73696	1	94	94	95.7106
14	7	8.74488	0.792608	1	114	114	105.255
14	7	1.19859	1.45337	1	293	293	111.801
14	7	0.874984	1.68753	1	188	188	7.12502
14	7	11.0092	1.65434	1	208	208	16.9908
14	7	3.55281	2.00858	1	114	114	117.553
14	7	1.52881	1.9295	1	304	304	122.471
14	7	3.93068	1.88096	1	163	163	166.931
14	7	0.173658	2.29574	1	264	264	84.1737
14	7	4.21759	1.20276	1	14	14	9.78241
14	7	7.1363	1.09277	1	302	302	114.864
14	7	1.91123	1.31094	1	310	310	128.089
14	7	2.49148	2.23845	1	127	127	124.509
14	7	0.246113	1.55252	1	216	216	35.7539
14	7	3.70696	1.49245	1	145	145	148.707
14	7	3.95296	1.97589	1	93	93	96.953
14	7	6.62087	4.06449	1	82	82	75.3791
14	7	3.56505	0.926503	1	113	113	116.565
14	7	10.5923	0.817963	1	126	126	115.408
15	7	6.90614	5.49658	1	179	179	5.90614
15	7	1.76517	7.975	1	186	186	7.76517
15	7	18.1094	5.28734	1	94	94	112.109
15	7	14.9144	5.94242	1	296	296	130.914
15	7	3.47443	5.18587	1	201	201	17.5256
15	7	4.09582	6.29798	1	121	121	125.096
15	7	0.659808	6.67718	1	52	52	51.3402
15	7	14.7751	9.4555	1	280	280	114.775
15	7	6.00538	3.72933	1	244	244	57.9946
15	7	6.82017	5.96862	1	55	55	48.1798
15	7	0.0362435	11.709	1	166	166	165.964
15	7	12.9704	6.25628	1	264	264	71.0296
15	7	9.8699	4.6661	1	243	243	53.1301
15	7	0.935673	3.87204	1	88	88	87.0643
15	7	4.07249	5.58667	1	66	66	61.9275
15	7	1.42697	4.69544	1	187	187	8.42697
15	7	8.29005	6.09035	1	191	191	19.29
15	7	1.69515	5.50045	1	168	168	169.695
15	7	11.866	4.35168	1	290	290	121.866
15	7	5.7816	4.55974	1	143	143	148.782
15	7	7.42594	3.79147	1	140	140	147.426
15	7	9.08562	5.34054	1	130	130	139.086
15	7	8.1301	5.6081	1	45	45	36.8699
15	7	12.7811	4.89736	1	121	121	133.781
15	7	12.9245	3.6204	1	278	278	110.925
15	7	6.35775	5.2896	1	202	202	15.6422
15	7	13.5651	5.75212	1	257	257	63.4349
15	7	5.29857	6.75186	1	172	172	166.701
15	7	11.1944	5.24818	1	231	231	39.8056
15	7	6.36646	4.96184	1	228	228	41.6335
16	7	6.24611	4.11723	1	228	228	54.2461
16	7	0.197486	1.83282	1	241	241	60.8025
16	7	10.5377	2.19402	1	245	245	54.4623
16	7	9.78389	3.12757	1	233	233	62.7839
16	7	11.7778	2.74269	1	293	293	124.778
16	7	3.25319	2.25876	1	139	139	142.253
16	7	1.35775	2.43294	1	28	28	29.3578
16	7	20.0686	1.89064	1	100	100	120.069
16	7	9	2.06511	1	126	126	135
16	7	10.6197	1.7194	1	135	135	145.62
16	7	10.556	2.82713	1	145	145	155.556
16	7	3.82149	3.12462	1	53	53	56.8215
16	7	6.1523	3.05178	1	116	116	122.152
16	7	5.74356	2.29452	1	99	99	104.744
16	7	13.008	2.70501	1	312	312	145.008
16	7	3.44003	2.74405	1	196	196	19.44
16	7	10.1944	3.14047	1	50	50	39.8056
16	7	9.59229	2.18368	1	245	245	55.4077
16	7	1.68468	2.28021	1	135	135	136.685
16	7	6.38139	2.03931	1	262	262	75.6186
16	7	12.821	2.11708	1	148	148	160.821
16	7	3.07208	4.4567	1	69	69	72.0721
16	7	10.1975	2.26633	1	199	199	29.1975
16	7	3.43748	2.68885	1	187	187	10.4375
16	7	6.69545	1.93561	1	104	104	110.695
16	7	9.26789	2.08726	1	130	130	139.268
16	7	2.30993	2.53417	1	54	54	56.3099
16	7	3.9454	3.58155	1	168	168	164.055
16	7	1.7185	3.35856	1	71	71	72.7185
16	7	14.4349	2.08653	1	266	266	71.5651
17	7	1.41951	1.80475	1	314	314	132.58
17	7	6.70595	1.74127	1	202	202	28.706
17	7	2.82471	1.31319	1	286	286	108.825
17	7	0.763642	6.88039	1	184	184	4.76364
17	7	4.90477	2.3586	1	245	245	69.9048
17	7	3.61986	2.20253	1	71	71	67.3801
17	7	3.08877	2.2516	1	305	305	128.089
17	7	7.31385	1.23761	1	261	261	73.6861
17	7	0.963757	1.50753	1	210	210	30.9638
17	7	0.864514	4.4029	1	184	184	4.86451
17	7	2.03624	3.12835	1	168	168	165.964
17	7	7.12472	3.00346	1	256	256	68.8753
17	7	0.300756	1.26845	1	208	208	28.3008
17	7	1.43623	1.23892	1	229	229	47.5638
17	7	2.07961	3.40501	1	183	183	5.07961
17	7	0.601295	2.68604	1	175	175	175.601
17	7	2.03624	1.15659	1	147	147	149.036
17	7	1.96974	1.35709	1	132	132	130.03
17	7	3.17551	1.29325	1	218	218	34.8245
17	7	12.866	0.936337	1	71	71	58.134
17	7	0.862405	1.47978	1	88	88	87.1376
17	7	2.1301	1.40635	1	321	321	143.13
17	7	1.31455	2.85546	1	184	184	5.31455
17	7	6.85446	1.44147	1	256	256	69.1455
17	7	1.9454	2.32294	1	76	76	74.0546
17	7	2.62416	1.54258	1	238	238	55.3758
17	7	1.1363	2.2383	1	161	161	159.864
17	7	3.78897	2.03615	1	238	238	54.211
17	7	2.7398	1.75393	1	199	199	16.2602
17	7	0.864514	2.93067	1	176	176	175.135
18	7	1.04094	1.24989	1	100	100	101.041
18	7	1.14139	1.34368	1	241	241	59.8586
18	7	0.080598	1.01215	1	100	100	100.081
18	7	12.9625	1.56079	1	236	236	68.9625
18	7	0.0952312	1.5451	1	70	70	69.9048
18	7	10.3003	1.7241	1	131	131	120.7
18	7	2.39293	1.1327	1	231	231	53.3929
18	7	0.688787	1.07672	1	279	279	99.6888
18	7	1.86598	0.911168	1	195	195	13.134
18	7	5.22876	1.41427	1	243	243	57.7712
18	7	1.77783	1.34786	1	237	237	55.2222
18	7	0.916555	1.3359	1	199	199	18.0834
18	7	2.12502	1.34377	1	175	175	172.875
18	7	6.53999	1.49168	1	158	158	151.46
18	7	1.88213	2.07431	1	240	240	61.8821
18	7	7.06152	1.70067	1	254	254	66.9385
18	7	1.1155	1.58465	1	95	95	96.1155
18	7	5.42765	1.41292	1	156	156	161.428
18	7	5.03624	1.4503	1	99	99	104.036
18	7	4.08877	0.000627995	1	79	79	83.0888
18	7	12.6992	1.51543	1	86	86	73.3008
18	7	0.216794	2.49875	1	178	178	177.783
18	7	1.65771	2.03801	1	174	174	172.342
18	7	4.32565	2.80383	1	221	221	36.6743
18	7	0.251912	2.14079	1	177	177	177.252
18	7	0.572544	1.37647	1	60	60	60.5725
18	7	7.19917	1.35305	1	191	191	18.1992
18	7	1.97932	3.68977	1	179	179	0.97932
18	7	7.03224	0.936181	1	129	129	136.032
18	7	9.47119	1.19223	1	293	293	122.471
19	7	3.59464	2.47148	1	266	266	82.4054
19	7	4.56505	2.86046	1	247	247	71.5651
19	7	8.03624	2.43391	1	96	96	104.036
19	7	21.8699	3.2568	1	195	195	36.8699
19	7	20	2.16694	1	155	155	135
19	7	5.60256	2.42744	1	228	228	42.3974
19	7	14.2488	1.83696	1	255	255	60.7512
19	7	10.5923	2.2748	1	204	204	34.5923
19	7	25	2.65342	1	160	160	135
19	7	1.98311	4.29913	1	162	162	160.017
19	7	14.5651	4.93351	1	258	258	63.4349
19	7	8.90614	3.66163	1	42	42	50.9061
19	7	3.61986	2.68367	1	19	19	22.6199
19	7	14	1.85039	1	239	239	45
19	7	7.03751	1.71668	1	256	256	68.9625
19	7	16.7398	2.00017	1	237	237	73.7398
19	7	10.4349	3.78507	1	172	172	161.565
19	7	16.1759	3.70564	1	226	226	62.1759
19	7	7.43495	3.08964	1	214	214	26.5651
19	7	6.76829	2.39216	1	275	275	101.768
19	7	0.619865	3.75651	1	68	68	67.3801
19	7	11	2.80854	1	214	214	45
19	7	8.59464	1.98552	1	46	46	37.4054
19	7	13.7468	2.17038	1	24	24	37.7468
19	7	21.7398	1.87063	1	97	97	118.74
19	7	7.39871	3.66524	1	228	228	40.6013
19	7	0.905243	2.23942	1	212	212	32.9052
19	7	1.62375	1.48921	1	163	163	164.624
19	7	7.42077	2.11987	1	263	263	75.5792
19	7	11.1859	2.97131	1	300	300	131.186
20	7	19.5085	2.87523	1	165	165	145.491
20	7	16.8056	2.90129	1	203	203	39.8056
20	7	11.1986	2.50495	1	168	168	156.801
20	7	5.24052	3.14374	1	233	233	58.2405
20	7	2.7974	2.4997	1	175	175	177.797
20	7	6.21888	2.75058	1	230	230	43.7811
20	7	2.19859	2.85485	1	156	156	158.199
20	7	1.56505	2.5048	1	250	250	71.5651
20	7	16.8377	1.85586	1	199	199	35.8377
20	7	10.3859	2.19761	1	127	127	137.386
20	7	0.025066	2.35892	1	178	178	178.025
20	7	11.3322	2.87915	1	55	55	43.6678
20	7	6.73523	2.08548	1	334	334	147.265
20	7	0.869898	3.26022	1	171	171	171.87
20	7	0.217593	1.92242	1	170	170	170.218
20	7	2.83874	1.65388	1	156	156	158.839
20	7	4.90915	4.57619	1	183	183	178.091
20	7	1.83365	2.98879	1	156	156	157.834
20	7	10	2.06934	1	305	305	135
20	7	6.1363	4.41588	1	256	256	69.8637
20	7	6.89909	3.81339	1	227	227	40.1009
20	7	8.61986	3.72247	1	121	121	112.38
20	7	0.130102	3.60557	1	217	217	36.8699
20	7	0.820992	2.31879	1	115	115	115.821
20	7	2	2.80238	1	227	227	45
20	7	1.99491	1.86755	1	132	132	133.995
20	7	2.23636	6.16154	1	173	173	175.236
20	7	12.2026	2.11726	1	125	125	137.203
20	7	2.25644	2.92893	1	197	197	14.7436
20	7	0.0283962	2.71241	1	142	142	142.028
21	7	1.81556	1.40496	1	181	181	2.81556
21	7	6.76829	1.83806	1	185	185	11.7683
21	7	5.60445	1.90837	1	294	294	119.604
21	7	4.1304	1.74701	1	215	215	39.1304
21	7	8.03623	1.95118	1	14	14	22.0362
21	7	11.9048	1.49543	1	347	347	155.095
21	7	0.38654	2.00241	1	263	263	83.3865
21	7	8.45694	1.19551	1	149	149	157.457
21	7	7.47684	1.74458	1	336	336	148.523
21	7	1.46414	1.3085	1	75	75	76.4641
21	7	1.76517	1.29168	1	96	96	97.7652
21	7	13.5763	3.13428	1	215	215	48.5763
21	7	2	1.3576	1	133	133	135
21	7	4.7357	1.60612	1	228	228	43.2643
21	7	5.9321	1.12722	1	163	163	157.068
21	7	0	0.878981	1	90	90	90
21	7	0.181111	1.25001	1	297	297	117.181
21	7	6.90524	1.76332	1	116	116	122.905
21	7	6.92847	1.64006	1	72	72	65.0715
21	7	2.85337	1.60567	1	54	54	51.1466
21	7	5.8699	1.52709	1	329	329	143.13
21	7	2.19321	0.998705	1	214	214	36.1932
21	7	17	0.480256	1	73	73	90
21	7	2	1.35537	1	137	137	135
21	7	0.897765	1.14285	1	110	110	110.898
21	7	7.07746	1.09892	1	41	41	48.0775
21	7	6.3925	1.42219	1	173	173	166.608
21	7	2.62699	2.07967	1	146	146	148.627
21	7	1.34325	1.30589	1	151	151	149.657
21	7	10.9052	1.22518	1	158	158	147.095
22	7	2.47589	1.69957	1	198	198	15.5241
22	7	1.44003	1.17421	1	153	153	154.44
22	7	2.77568	1.75918	1	215	215	37.7757
22	7	1.8699	1.54328	1	235	235	53.1301
22	7	1.79888	0.84274	1	297	297	115.201
22	7	1.70984	2.22519	1	275	275	96.7098
22	7	0.880659	1.43446	1	143	143	143.881
22	7	6.69007	1.13631	1	297	297	123.69
22	7	4.93151	2.04851	1	245	245	60.0685
22	7	11.4349	2.31443	1	83	83	71.5651
22	7	3.30621	2.05342	1	199	199	22.3062
22	7	3.55707	2.05559	1	193	193	16.5571
22	7	3.82648	2.18525	1	101	101	104.826
22	7	2.99462	2.57396	1	80	80	77.0054
22	7	3.03751	1.54254	1	153	153	156.038
22	7	2.86636	1.56183	1	113	113	115.866
22	7	0.290163	1.65819	1	187	187	6.70984
22	7	3.75948	1.38433	1	197	197	13.2405
22	7	3.50427	1.92101	1	163	163	166.504
22	7	1.41266	1.43683	1	162	162	163.413
22	7	1.19406	2.54649	1	65	65	66.1941
22	7	5.88866	2.43024	1	84	84	78.1113
22	7	1.41266	1.36406	1	198	198	16.5873
22	7	1.32869	1.34438	1	60	60	58.6713
22	7	2.92464	2.14024	1	254	254	71.0754
22	7	4.60707	2.59218	1	167	167	171.607
22	7	13.4762	1.4523	1	114	114	127.476
22	7	4.04937	1.62695	1	194	194	9.95063
22	7	3.1301	1.59662	1	320	320	143.13
22	7	10.5741	1.22922	1	292	292	122.574
23	7	0.537678	1.36805	1	35	35	35.5377
23	7	5.84181	2.2125	1	183	183	8.84181
23	7	10.4537	1.53764	1	118	118	128.454
23	7	9	1.5612	1	36	36	45
23	7	2.86598	1.43343	1	119	119	121.866
23	7	3.92751	1.3917	1	238	238	61.9275
23	7	8.30053	1.42017	1	126	126	117.699
23	7	3.88517	1.48174	1	241	241	64.8852
23	7	3.97613	2.14846	1	188	188	11.9761
23	7	7.90938	1.40033	1	128	128	135.909
23	7	1.30053	2.04954	1	241	241	62.3005
23	7	6.44033	1.41157	1	44	44	50.4403
23	7	0.878697	1.77721	1	73	73	72.1213
23	7	9.00901	1.48955	1	222	222	51.009
23	7	0.592811	0.915933	1	105	105	105.593
23	7	4.0546	1.24762	1	250	250	74.0546
23	7	0.783888	1.14543	1	152	152	152.784
23	7	19.4007	1.39767	1	200	200	39.4007
23	7	9.43495	1.2074	1	279	279	108.435
23	7	14.0169	1.5199	1	146	146	160.017
23	7	2.1155	1.19538	1	41	41	38.8845
23	7	6.30076	0.912497	1	112	112	118.301
23	7	2.80251	1.95987	1	238	238	60.8025
23	7	2.76364	1.0159	1	133	133	130.236
23	7	4.73523	1.62901	1	152	152	147.265
23	7	2.38931	1.20682	1	222	222	39.6107
23	7	2.53077	1.41608	1	264	264	81.4692
23	7	5.57406	1.10922	1	207	207	32.5741
23	7	4.40536	1.43684	1	192	192	7.59464
23	7	12.0546	0.986545	1	107	107	119.055
24	7	1.65981	1.47782	1	233	233	51.3402
24	7	9.18471	1.22741	1	152	152	142.815
24	7	8.80141	1.09394	1	32	32	23.1986
24	7	7.46232	0.881531	1	137	137	144.462
24	7	4.82854	1.04009	1	242	242	57.1715
24	7	2.44774	1.42082	1	199	199	21.4477
24	7	0.0902769	1.20731	1	126	126	125.91
24	7	0.178512	0.343756	1	168	168	168.179
24	7	8	1.83638	1	143	143	135
24	7	3	0.326947	1	177	177	0
24	7	6.53878	0.883296	1	247	247	60.4612
24	7	1.12502	0.302641	1	174	174	172.875
24	7	0.642246	0.826756	1	240	240	60.6422
24	7	15.5651	1.08357	1	101	101	116.565
24	7	1.74949	0.813683	1	247	247	68.7495
24	7	0.241459	0.408111	1	197	197	17.2415
24	7	10.3895	0.336228	1	186	186	16.3895
24	7	7.70696	0.415469	1	174	174	166.293
24	7	14.6952	0.558608	1	205	205	10.3048
24	7	1.02053	0.405219	1	299	299	117.979
24	7	0.709954	1.15464	1	245	245	64.29
24	7	10.0256	1.42587	1	261	261	70.9744
24	7	11.8699	1.44439	1	160	160	171.87
24	7	6.09523	0.341803	1	121	121	114.905
24	7	0.420773	1.53713	1	194	194	14.4208
24	7	0.198591	0.412243	1	158	158	158.199
24	7	6.83086	0.312985	1	323	323	136.169
24	7	7.53768	1.68463	1	163	163	170.538
24	7	2.43495	2.06739	1	151	151	153.435
24	7	11.5241	0.854103	1	86	86	74.4759
25	7	7.38954	2.3045	1	81	81	73.6105
25	7	2.12401	1.68318	1	103	103	105.124
25	7	10.2189	1.77003	1	144	144	133.781
25	7	4.75948	2.55838	1	207	207	31.7595
25	7	7.38034	1.75814	1	27	27	34.3803
25	7	7	2.05471	1	218	218	45
25	7	3.30993	2.00088	1	188	188	11.3099
25	7	2.98872	2.01037	1	290	290	112.989
25	7	0.0362435	2.38293	1	166	166	165.964
25	7	7.75117	2.73579	1	188	188	15.7512
25	7	2.70984	2.0317	1	266	266	83.2902
25	7	2.71059	1.6649	1	42	42	39.2894
25	7	0.162347	2.3674	1	54	54	54.1623
25	7	10.8285	1.67594	1	248	248	57.1715
25	7	2.44395	2.67845	1	157	157	159.444
25	7	10.3706	1.94876	1	79	79	68.6294
25	7	3.44719	1.4164	1	76	76	72.5528
25	7	3.96376	2.79013	1	63	63	59.0362
25	7	5.82634	1.43493	1	225	225	50.8263
25	7	1.76829	2.35245	1	170	170	168.232
25	7	2.60129	3.46528	1	173	173	175.601
25	7	0.111342	1.84688	1	237	237	56.8887
25	7	2.56505	2.1451	1	201	201	18.4349
25	7	48.5345	2.06113	1	101	101	149.534
25	7	13.273	1.89938	1	123	123	136.273
25	7	4.52881	2.59837	1	217	217	32.4712
25	7	5.92754	1.59125	1	303	303	128.928
25	7	3.61966	2.01237	1	83	83	79.3803
25	7	2.44395	2.16192	1	203	203	20.556
25	7	7.53665	1.83373	1	147	147	154.537
26	7	9.59229	3.21834	1	25	25	34.5923
26	7	0.853374	1.91955	1	232	232	51.1466
26	7	4.85337	2.22702	1	34	34	38.8534
26	7	0.926246	2.2767	1	279	279	99.9262
26	7	0.236102	3.71116	1	316	316	135.764
26	7	0.528855	2.04623	1	279	279	98.4711
26	7	0.810794	5.69616	1	118	118	118.811
26	7	11.9423	1.78714	1	166	166	154.058
26	7	14.9546	3.71196	1	242	242	47.0454
26	7	4.02959	2.11931	1	112	112	116.03
26	7	16.7546	6.24268	1	207	207	43.7546
26	7	2.3948	1.70437	1	57	57	54.6052
26	7	0.842524	4.9436	1	180	180	179.157
26	7	0.488944	3.47524	1	172	172	171.511
26	7	0	1.92595	1	270	270	90
26	7	5.19859	1.84156	1	297	297	111.801
26	7	5.02136	1.6954	1	138	138	132.979
26	7	10.8532	4.99434	1	172	172	161.147
26	7	1.17366	3.13507	1	83	83	84.1737
26	7	1.75865	1.7187	1	287	287	108.759
26	7	4.41951	7.01028	1	178	178	2.41951
26	7	3.34618	1.83955	1	203	203	19.6538
26	7	1.30993	1.74936	1	125	125	123.69
26	7	2.69007	3.0209	1	194	194	11.3099
26	7	6.40988	1.65824	1	256	256	69.5901
26	7	11.6991	3.77691	1	208	208	39.6991
26	7	6.69007	1.96932	1	243	243	56.3099
26	7	3.9494	1.52563	1	121	121	117.051
26	7	27.6598	2.39695	1	169	169	141.34
26	7	11.3807	1.84525	1	159	159	147.619
27	7	47.8185	13.3844	1	223	223	90.8185
27	7	25.1524	3.40456	1	288	288	133.152
27	7	3.46554	5.98738	1	162	162	165.466
27	7	4.55707	3.1859	1	33	33	28.4429
27	7	7.91655	2.62303	1	206	206	18.0834
27	7	8.6075	3.0404	1	338	338	166.608
27	7	14.1468	2.4385	1	213	213	18.8532
27	7	15.8699	1.8603	1	249	249	53.1301
27	7	4.81407	2.69044	1	179	179	3.81407
27	7	13.3602	2.06898	1	131	131	144.36
27	7	13.1702	1.8156	1	232	232	38.8298
27	7	19.2152	2.6209	1	115	115	134.215
27	7	2	2.11465	1	268	268	90
27	7	81	0.00275898	1	189	189	90
27	7	8.80427	3.49941	1	184	184	12.8043
27	7	19.8014	2.53412	1	223	223	23.1986
27	7	4.20677	3.39754	1	190	190	14.2068
27	7	3.64598	3.59892	1	156	156	152.354
27	7	19	2.19189	1	64	64	45
27	7	5.04245	2.05276	1	45	45	39.9575
27	7	22.3791	2.10284	1	82	82	59.6209
27	7	8.10091	4.194	1	167	167	175.101
27	7	1.96376	2.69464	1	196	196	14.0362
27	7	24.8866	2.08154	1	266	266	61.1134
27	7	0.919076	3.60034	1	133	133	133.919
27	7	4.17901	2.68922	1	210	210	25.821
27	7	14.44	2.20816	1	40	40	25.56
27	7	21.9423	2.61739	1	274	274	115.942
27	7	12.5651	2.23858	1	76	76	63.4349
27	7	2.78264	2.38069	1	149	149	151.783
28	7	30.444	5.75206	1	321	321	110.556
28	7	11.6013	3.42397	1	29	29	40.6013
28	7	5.61046	2.16965	1	293	293	118.61
28	7	9.57422	2.17418	1	185	185	14.5742
28	7	2.18884	3.30265	1	173	173	170.811
28	7	8.85446	3.10556	1	192	192	20.8545
28	7	5.87599	1.98477	1	291	291	105.124
28	7	4.46554	2.21742	1	251	251	75.4655
28	7	8.32272	2.65489	1	174	174	165.677
28	7	31.9745	2.28881	1	215	215	66.9745
28	7	9.87533	2.22762	1	205	205	34.8753
28	7	6.11934	3.16497	1	330	330	143.881
28	7	4.59281	2.33709	1	169	169	164.407
28	7	2.85601	2.29679	1	177	177	174.144
28	7	5.25512	4.13193	1	190	190	15.2551
28	7	4.43899	2.33143	1	60	60	55.561
28	7	0.0454085	3.09974	1	2	2	2.04541
28	7	0.443955	3.64629	1	246	246	65.556
28	7	10.8699	3.34431	1	206	206	36.8699
28	7	0.264295	2.652	1	92	92	91.7357
28	7	19.4328	4.57415	1	134	134	114.567
28	7	8.83874	2.73876	1	105	105	113.839
28	7	5.9228	1.67025	1	130	130	124.077
28	7	2.07357	1.53701	1	121	121	118.926
28	7	0.407711	2.61664	1	145	145	145.408
28	7	6.70864	2.54183	1	126	126	119.291
28	7	0.636577	3.54612	1	181	181	1.63658
28	7	4.46335	2.46188	1	201	201	25.4633
28	7	9.47737	2.6363	1	221	221	50.4774
28	7	12.6013	1.97772	1	298	298	130.601
29	7	7.43141	2.79274	1	135	135	142.431
29	7	16.2176	2.7333	1	109	109	125.218
29	7	8.33022	3.38552	1	116	116	124.33
29	7	9.34109	2.55382	1	285	285	114.341
29	7	5.77514	3.88986	1	116	116	110.225
29	7	0.366461	6.03255	1	177	177	176.634
29	7	0.489553	3.8218	1	227	227	47.4896
29	7	13.6901	3.3353	1	250	250	56.3099
29	7	11.7751	3.10297	1	283	283	114.775
29	7	1.72758	4.10568	1	172	172	170.272
29	7	11.1155	2.84104	1	130	130	141.116
29	7	1.12502	2.96315	1	174	174	172.875
29	7	9.32453	2.39073	1	176	176	166.675
29	7	2.93567	4.12288	1	180	180	177.064
29	7	12.2894	3.73525	1	243	243	50.7106
29	7	2.34019	3.58298	1	131	131	128.66
29	7	9.23067	4.16754	1	280	280	109.231
29	7	9.92751	4.25976	1	232	232	61.9275
29	7	1.17366	3.65801	1	308	308	129.174
29	7	12.1707	2.88039	1	98	98	110.171
29	7	4.29957	3.94302	1	68	68	72.2996
29	7	4.99082	4.58698	1	168	168	163.009
29	7	5.69379	3.00748	1	152	152	157.694
29	7	3.60282	2.36868	1	175	175	178.603
29	7	8.7357	2.72514	1	52	52	43.2643
29	7	2.00354	6.83267	1	99	99	101.004
29	7	3.95578	2.2339	1	107	107	110.956
29	7	8.50143	2.31973	1	193	193	21.5014
29	7	6.43495	3.76333	1	147	147	153.435
29	7	8.18593	2.99143	1	147	147	138.814
30	7	6.34618	2.91997	1	199	199	25.3462
30	7	3.70995	0.37364	1	113	113	109.29
30	7	1.01279	6.57289	1	88	88	86.9872
30	7	44.1738	7.6417	1	222	222	86.1738
30	7	4.49259	2.09532	1	254	254	69.5074
30	7	5.46554	2.84224	1	245	245	59.5345
30	7	12.1986	0.295549	1	236	236	68.1986
30	7	1.24146	1.33519	1	119	119	117.759
30	7	3.59228	1.46849	1	119	119	115.408
30	7	5.80141	1.24908	1	254	254	68.1986
30	7	0.815084	1.22399	1	95	95	94.1849
30	7	0.146687	3.0602	1	188	188	7.85331
30	7	31.0546	0.351186	1	227	227	15.9454
30	7	12.9887	0.360051	1	80	80	67.0113
30	7	9.26373	1.54909	1	113	113	103.736
30	7	7.75947	0.325686	1	147	147	154.759
30	7	13.4495	0.295057	1	173	173	159.55
30	7	7.9245	0.26511	1	257	257	69.0755
30	7	4.56505	1.67188	1	203	203	18.4349
30	7	5.43495	0.316237	1	58	58	63.4349
30	7	1.90614	0.326555	1	229	229	50.9061
30	7	2.54629	0.318859	1	221	221	38.4537
30	7	4.43665	0.649675	1	133	133	137.437
30	7	11.3106	0.189809	1	68	68	56.6894
30	7	3.15466	0.267306	1	172	172	168.845
30	7	1.33703	6.87713	1	136	136	134.663
30	7	1.42367	4.75165	1	175	175	176.424
30	7	0.0192072	5.49581	1	178	178	177.981
30	7	10.4231	0.994328	1	169	169	158.577
30	7	9.08406	0.406505	1	338	338	167.084
31	7	11.9314	1.75166	1	138	138	149.931
31	7	5.61565	1.60741	1	177	177	171.384
31	7	10	1.04853	1	235	235	45
31	7	3.05609	0.922533	1	152	152	155.056
31	7	0.863697	1.80639	1	204	204	24.8637
31	7	6.85032	1.52713	1	214	214	27.1497
31	7	0.743563	1.36624	1	256	256	75.2564
31	7	12.3462	2.44339	1	212	212	19.6538
31	7	1.64762	1.02448	1	144	144	142.352
31	7	4.40742	1.57839	1	188	188	12.4074
31	7	5.03429	1.54707	1	193	193	18.0343
31	7	4.94391	1.10301	1	155	155	159.944
31	7	3.10273	0.898159	1	256	256	72.8973
31	7	1.53077	1.34919	1	97	97	98.5308
31	7	1.81508	2.51296	1	186	186	4.18492
31	7	3.38034	0.720027	1	121	121	124.38
31	7	3.56505	1.00448	1	113	113	116.565
31	7	13.0738	0.91674	1	203	203	9.92625
31	7	1.88553	1.52044	1	171	171	169.114
31	7	7.69515	1.53197	1	198	198	10.3048
31	7	2.00538	1.86018	1	150	150	147.995
31	7	6.01311	1.1061	1	46	46	39.9869
31	7	2.84217e-14	1.19331	1	225	225	45
31	7	1.53077	1.19807	1	83	83	81.4692
31	7	6.06081	1.74347	1	142	142	135.939
31	7	5.98872	0.819436	1	73	73	67.0113
31	7	6.52557	4.61666	1	214	214	27.4744
31	7	2.40758	1.51012	1	340	340	162.408
31	7	4.74616	1.26105	1	274	274	98.7462
31	7	1.34988	1.29184	1	154	154	152.65
32	7	21.3518	1.96882	1	198	198	39.3518
32	7	2.91825	2.11724	1	226	226	48.9182
32	7	2.08562	2.10476	1	272	272	94.0856
32	7	3.55	2.13592	1	61	61	57.45
32	7	8.95097	1.91159	1	71	71	62.049
32	7	7.83874	1.60684	1	286	286	113.839
32	7	0.567904	2.07204	1	88	88	88.5679
32	7	3.53479	1.61854	1	152	152	148.465
32	7	0.826342	1.94406	1	320	320	140.826
32	7	4.09284	2.16401	1	303	303	127.093
32	7	5.92625	2.37635	1	139	139	144.926
32	7	0.744672	1.8167	1	163	163	162.255
32	7	1.95578	1.2461	1	251	251	69.0442
32	7	12.326	1.72851	1	212	212	44.326
32	7	6.92643	1.46022	1	112	112	118.926
32	7	5.24611	2.25843	1	94	94	99.2461
32	7	0.219247	2.36858	1	151	151	150.781
32	7	1.90524	1.1887	1	239	239	57.0948
32	7	2.28915	1.12983	1	92	92	94.2892
32	7	0.954231	1.94141	1	37	37	37.9542
32	7	3.04094	1.37704	1	143	143	146.041
32	7	0.892666	1.59393	1	190	190	9.10733
32	7	4.6539	2.09471	1	174	174	169.346
32	7	0.878697	1.57771	1	107	107	107.879
32	7	1.84662	1.61849	1	181	181	2.84662
32	7	2.25442	1.69973	1	234	234	51.7456
32	7	7.22775	1.74275	1	107	107	114.228
32	7	11.556	1.86642	1	99	99	110.556
32	7	1.36342	1.79339	1	312	312	133.363
32	7	1.61966	2.00559	1	144	144	145.62
33	7	4.01837	2.07865	1	116	116	120.018
33	7	10.4518	1.40051	1	303	303	133.452
33	7	1.1186	2.35379	1	182	182	0.881404
33	7	3.53768	2.06616	1	238	238	54.4623
33	7	3.97263	1.28028	1	265	265	81.0274
33	7	14.9726	4.07874	1	309	309	143.973
33	7	0.315316	2.60466	1	133	133	133.315
33	7	18.5312	2.45399	1	115	115	133.531
33	7	1.78897	1.85159	1	320	320	141.789
33	7	1.18593	2.74176	1	175	175	176.186
33	7	0.161566	1.6135	1	154	154	153.838
33	7	2.67134	4.73885	1	155	155	157.671
33	7	7.54098	1.01987	1	256	256	68.459
33	7	1.10376	1.4289	1	197	197	18.1038
33	7	1.27772	1.67091	1	246	246	64.7223
33	7	0	0.6328	1	90	90	90
33	7	0.00955381	3.17131	1	178	178	177.99
33	7	4.53768	2.18339	1	239	239	54.4623
33	7	0.432096	2.62771	1	91	91	91.4321
33	7	1.9465	1.54145	1	208	208	26.0535
33	7	1.85601	2.8093	1	94	94	95.856
33	7	3.12502	2.60234	1	86	86	82.875
33	7	4.46232	1.46743	1	230	230	54.4623
33	7	7.488	2.31737	1	215	215	27.512
33	7	1.74356	1.7049	1	167	167	165.256
33	7	7.48617	1.86429	1	161	161	168.486
33	7	17.0608	1.17431	1	113	113	130.061
33	7	3.52316	1.34301	1	215	215	31.4768
33	7	3.03624	2.0347	1	214	214	30.9638
33	7	1.49755	1.27676	1	201	201	19.5024
34	7	1	1.04086	1	91	91	90
34	7	3.35899	1.93895	1	254	254	70.641
34	7	8.31121	1.81129	1	63	63	54.6888
34	7	11.6769	1.67983	1	328	328	159.677
34	7	8.56505	1.95486	1	162	162	153.435
34	7	3.5198	3.08736	1	177	177	173.48
34	7	4.87528	2.34935	1	244	244	68.8753
34	7	13.5297	1.59734	1	197	197	30.5297
34	7	10.2505	1.51016	1	191	191	21.2505
34	7	6.62087	1.69354	1	188	188	14.6209
34	7	3.19854	2.34462	1	284	284	107.199
34	7	2.55	2.76128	1	120	120	122.55
34	7	9	4.68452	1	324	324	135
34	7	5.44033	4.1792	1	135	135	129.56
34	7	4.8814	2.33975	1	139	139	134.119
34	7	3.92625	3.46347	1	309	309	125.074
34	7	3.42077	2.61441	1	124	124	120.579
34	7	1.5679	3.03521	1	138	138	136.432
34	7	0.185925	1.9131	1	274	274	93.8141
34	7	4.29735	1.53215	1	118	118	113.703
34	7	6.17859	2.08411	1	293	293	106.821
34	7	12.0054	2.1313	1	200	200	32.0054
34	7	1.66784	1.41033	1	232	232	50.3322
34	7	12.6186	2.51177	1	162	162	149.381
34	7	6.25384	3.02261	1	195	195	8.74616
34	7	7.08916	1.34448	1	235	235	47.9108
34	7	0.906141	1.45219	1	185	185	5.90614
34	7	4.30485	1.64681	1	186	186	10.3048
34	7	16.2505	0.984879	1	275	275	111.251
34	7	10.7751	2.32952	1	239	239	69.7751
35	7	17.1211	4.17752	1	240	240	42.8789
35	7	10.7355	2.66966	1	110	110	120.735
35	7	4.49148	2.1842	1	141	141	145.491
35	7	3.43495	3.41684	1	105	105	108.435
35	7	4.2397	1.66222	1	316	316	131.76
35	7	4.56505	1.86039	1	338	338	153.435
35	7	1.07249	4.22667	1	153	153	151.928
35	7	3.11934	2.76416	1	147	147	143.881
35	7	3.60129	2.70372	1	143	143	139.399
35	7	1.14479	1.79969	1	249	249	70.1448
35	7	3.47119	2.2248	1	119	119	122.471
35	7	0.0947571	1.66643	1	282	282	102.095
35	7	4.42957	1.73266	1	153	153	148.57
35	7	4.75854	1.36417	1	157	157	152.241
35	7	4.42216	0.872785	1	236	236	60.4222
35	7	2.56013	2.87535	1	171	171	168.44
35	7	0.945396	1.25379	1	240	240	60.9454
35	7	2.03429	1.91967	1	286	286	108.034
35	7	0.577839	1.39509	1	61	61	60.4222
35	7	5.74949	2.40044	1	198	198	23.7495
35	7	0.797402	2.04931	1	48	48	47.2026
35	7	0.447188	2.33154	1	73	73	72.5528
35	7	1.35583	2.10716	1	319	319	140.356
35	7	1.18492	1.82628	1	273	273	94.1849
35	7	2.13419	1.20373	1	282	282	99.8658
35	7	2.47589	1.58905	1	198	198	15.5241
35	7	0.354025	1.87809	1	163	163	162.646
35	7	3.23483	3.50432	1	146	146	142.765
35	7	0.805571	2.40743	1	141	141	140.194
35	7	0.540976	0.944518	1	249	249	68.459
36	7	3.51045	1.98857	1	51	51	47.4896
36	7	7.39555	1.03687	1	143	143	150.396
36	7	56.4623	1.30351	1	268	268	144.462
36	7	16.8156	0.85409	1	121	121	137.816
36	7	7.1301	0.840557	1	271	271	98.1301
36	7	12.821	1.40586	1	167	167	154.179
36	7	3.18492	0.990426	1	91	91	94.1849
36	7	5.52754	1.95558	1	180	180	174.472
36	7	0.418055	1.45976	1	187	187	6.58194
36	7	4.81079	0.79404	1	114	114	118.811
36	7	7.83765	0.903424	1	332	332	144.162
36	7	3.86598	1.05417	1	242	242	58.134
36	7	6.27369	0.228689	1	126	126	132.274
36	7	11.2996	0.144082	1	254	254	62.7004
36	7	2.75117	0.506882	1	103	103	105.751
36	7	16.9275	0.601321	1	158	158	141.072
36	7	10.125	0.263983	1	248	248	57.875
36	7	5.69605	1.21262	1	178	178	172.304
36	7	21	0.000602007	1	249	249	90
36	7	8.1301	0.707124	1	225	225	36.8699
36	7	2.9423	1.12541	1	203	203	25.9423
36	7	5.76933	1.04579	1	200	200	25.7693
36	7	0.154942	1.22448	1	102	102	102.155
36	7	17.6598	0.719413	1	21	21	38.6598
36	7	7.78991	1.0606	1	231	231	43.2101
36	7	9.03026	1.17075	1	239	239	49.9697
36	7	42	0.0641909	1	228	228	90
36	7	9.67317	0.898156	1	136	136	126.327
36	7	5	1.081	1	130	130	135
36	7	2.0546	0.904462	1	162	162	164.055
37	7	8.18492	2.12008	1	139	139	130.815
37	7	2.1301	1.91103	1	309	309	126.87
37	7	8.38014	1.18242	1	104	104	112.38
37	7	1.38435	1.32693	1	235	235	53.6156
37	7	2.1593	1.05042	1	196	196	13.8407
37	7	3.41797	1.74027	1	301	301	117.582
37	7	7.34011	3.1887	1	298	298	125.34
37	7	9.3948	0.952989	1	71	71	80.3948
37	7	5.73336	0.937353	1	238	238	63.7334
37	7	13.204	0.936804	1	149	149	162.204
37	7	6.5115	1.98476	1	158	158	164.511
37	7	5.55429	1.67339	1	131	131	125.446
37	7	1.61149	1.03622	1	80	80	78.3885
37	7	1.98068	0.865863	1	259	259	80.9807
37	7	4.65981	0.956053	1	236	236	51.3402
37	7	7.97947	2.50814	1	155	155	162.979
37	7	6.63375	1.43538	1	306	306	132.634
37	7	6.93869	0.873481	1	244	244	57.0613
37	7	8.3045	1.07592	1	197	197	8.6955
37	7	5.72014	3.24615	1	134	134	139.72
37	7	2.42345	2.36018	1	229	229	46.5766
37	7	0.904183	0.79293	1	99	99	99.9042
37	7	3.22432	1.34528	1	94	94	97.2243
37	7	1.41084	2.04523	1	5	5	6.41084
37	7	0.687182	1.15128	1	196	196	15.3128
37	7	7.88517	1.55974	1	237	237	64.8852
37	7	0.100908	1.29552	1	85	85	85.1009
37	7	0	0.610782	1	90	90	90
37	7	3.87498	2.46898	1	191	191	7.12502
37	7	4.88269	1.96248	1	190	190	5.11731
38	7	7.02737	4.40505	1	241	241	53.9726
38	7	17.5651	1.55769	1	261	261	63.4349
38	7	30.6075	2.98633	1	181	181	31.6075
38	7	14.8403	1.35493	1	131	131	145.84
38	7	4.01279	1.6789	1	136	136	131.987
38	7	7.39871	1.57305	1	228	228	40.6013
38	7	2.93151	1.66129	1	207	207	29.9315
38	7	7.56505	1.61952	1	199	199	26.5651
38	7	5.35402	1.79672	1	258	258	72.646
38	7	2.69545	1.6974	1	153	153	155.695
38	7	7.57131	1.76473	1	284	284	111.571
38	7	3.71059	1.39277	1	92	92	95.7106
38	7	9.43495	1.4064	1	171	171	161.565
38	7	0.869898	1.29904	1	126	126	126.87
38	7	0.797402	1.70187	1	177	177	177.797
38	7	9.81407	1.5888	1	129	129	138.814
38	7	4.43748	1.1338	1	84	84	79.5625
38	7	5.90972	1.81332	1	120	120	125.91
38	7	9.87533	1.22657	1	115	115	124.875
38	7	1.30455	1.52449	1	113	113	114.305
38	7	6.97263	1.5393	1	223	223	36.0274
38	7	1.99873	1.3513	1	54	54	52.0013
38	7	7.06047	1.39956	1	169	169	161.94
38	7	1.00354	1.92067	1	100	100	101.004
38	7	8.85521	1.05227	1	259	259	70.1448
38	7	0	0.470035	1	90	90	90
38	7	79	0.36571	1	11	11	90
38	7	0.829825	1.11738	1	97	97	96.1702
38	7	2.36589	1.6008	1	276	276	98.3659
38	7	0.751174	1.18608	1	150	150	150.751
39	7	9.92751	2.24465	1	187	187	16.9275
39	7	12.4744	3.52249	1	165	165	152.526
39	7	8.38014	1.5381	1	76	76	67.6199
39	7	6.30395	1.8818	1	149	149	142.696
39	7	9.09349	1.43244	1	170	170	160.907
39	7	5.56717	1.49806	1	71	71	65.4328
39	7	3.01279	2.9447	1	270	270	86.9872
39	7	2.65981	1.58095	1	144	144	141.34
39	7	1.38034	2.25764	1	303	303	124.38
39	7	5.04541	1.70359	1	48	48	42.9546
39	7	8.40758	1.91085	1	199	199	27.4076
39	7	6.98311	1.42574	1	257	257	70.0169
39	7	4.52886	1.74742	1	148	148	143.471
39	7	8.43495	2.4314	1	170	170	161.565
39	7	10.1986	1.24467	1	103	103	113.199
39	7	3.51045	2.51894	1	129	129	132.51
39	7	3.59464	1.2183	1	139	139	142.595
39	7	7.52411	1.07162	1	262	262	74.4759
39	7	6.68038	1.30628	1	96	96	102.68
39	7	8.70995	1.65751	1	107	107	115.71
39	7	7.56505	1.9522	1	199	199	26.5651
39	7	7.72758	1.95997	1	92	92	99.7276
39	7	2.9454	2.17625	1	103	103	105.945
39	7	1.25644	2.75277	1	119	119	120.256
39	7	4.97041	1.35309	1	104	104	108.97
39	7	2.44395	3.09721	1	112	112	114.444
39	7	0.420773	3.07627	1	149	149	149.421
39	7	0.854458	4.09464	1	160	160	159.146
39	7	2.74949	2.00159	1	201	201	23.7495
39	7	3	2.09099	1	132	132	135
40	7	8.55247	2.22351	1	152	152	143.448
40	7	2.07068	1.98858	1	121	121	123.071
40	7	3	2.36971	1	228	228	45
40	7	14.5318	1.66212	1	243	243	48.4682
40	7	14.6568	1.54043	1	45	45	30.3432
40	7	0.660913	2.36838	1	122	122	122.661
40	7	6.17018	3.71666	1	180	180	173.83
40	7	19.7989	1.63582	1	45	45	25.2011
40	7	4.86598	1.20152	1	243	243	58.134
40	7	1.68615	1.42699	1	18	18	16.3139
40	7	5.43899	1.00452	1	241	241	55.561
40	7	0.0685828	2.01343	1	165	165	165.069
40	7	9.16644	2.04299	1	244	244	54.8336
40	7	8.55605	1.40899	1	78	78	69.444
40	7	4.04163	2.24994	1	228	228	43.9584
40	7	4.0546	1.59985	1	245	245	60.9454
40	7	0.228757	1.98492	1	148	148	147.771
40	7	20.7757	1.27338	1	253	253	52.2243
40	7	1.80141	2.30043	1	340	340	158.199
40	7	1.11134	1.43556	1	167	167	168.111
40	7	8.59281	3.4968	1	97	97	105.593
40	7	1.46232	2.17987	1	188	188	9.46232
40	7	9.1301	1.49215	1	136	136	126.87
40	7	0.888188	1.91975	1	314	314	133.112
40	7	2.67952	1.78664	1	167	167	164.32
40	7	10	1.31998	1	235	235	45
40	7	11.4759	1.81926	1	162	162	150.524
40	7	10.2532	1.70441	1	177	177	7.25319
40	7	17.5289	3.16808	1	109	109	126.529
40	7	1.36646	1.90075	1	223	223	41.6335
41	7	3.43495	1.68345	1	210	210	26.5651
41	7	0.535856	1.42947	1	167	167	166.464
41	7	8.47029	1.31138	1	141	141	149.47
41	7	8.57131	1.66247	1	193	193	21.5713
41	7	5.99202	1.637	1	61	61	55.008
41	7	1.00798	1.46702	1	189	189	10.008
41	7	3.19859	1.29691	1	20	20	23.1986
41	7	1.43665	1.66825	1	89	89	87.5634
41	7	11.875	1.51168	1	154	154	142.125
41	7	7.61046	1.58202	1	201	201	28.6105
41	7	4.1211	1.99864	1	137	137	132.879
41	7	1.62938	1.2476	1	67	67	68.6294
41	7	2.67131	1.55372	1	281	281	103.671
41	7	2.50143	1.34969	1	109	109	111.501
41	7	11.6598	1.76139	1	153	153	141.34
41	7	0.124672	1.54571	1	145	145	145.125
41	7	3.16914	2.20555	1	182	182	178.831
41	7	6.89777	1.26292	1	31	31	24.1022
41	7	5.31063	1.19696	1	118	118	123.311
41	7	3.00416	1.27407	1	255	255	71.9958
41	7	1.80141	1.20441	1	115	115	113.199
41	7	0.652223	3.10164	1	177	177	176.348
41	7	1.0577	1.62614	1	162	162	160.942
41	7	3.24902	2.06689	1	334	334	157.249
41	7	14.0546	1.64195	1	285	285	119.055
41	7	2.02507	1.87908	1	139	139	136.975
41	7	1.23597	1.56546	1	185	185	3.76403
41	7	2.03624	1.96971	1	12	12	14.0362
41	7	5.85521	1.24619	1	256	256	70.1448
41	7	4.18593	1.23659	1	143	143	138.814
42	7	4.97263	12.923	1	266	266	81.0274
42	7	3.71085	5.10605	1	127	127	130.711
42	7	0.854458	4.645	1	200	200	20.8545
42	7	7.34933	4.19898	1	97	97	104.349
42	7	11.5679	4.58394	1	13	13	1.4321
42	7	19.7932	6.94447	1	146	146	165.793
42	7	10.7067	3.29243	1	65	65	54.2933
42	7	4.56717	4.21536	1	250	250	65.4328
42	7	11.1448	3.4528	1	104	104	115.145
42	7	1.29957	4.30251	1	244	244	62.7004
42	7	20.2016	4.25739	1	37	37	16.7984
42	7	5.03624	4.41543	1	261	261	75.9638
42	7	16.8215	5.04517	1	310	310	146.821
42	7	10.2906	4.04676	1	143	143	132.709
42	7	5.97041	4.80891	1	167	167	161.03
42	7	7.59992	5.94584	1	181	181	173.4
42	7	2.95459	3.22176	1	140	140	137.045
42	7	27.1664	4.50291	1	98	98	125.166
42	7	3.30861	3.06599	1	232	232	48.6914
42	7	1	6.99657	1	179	179	0
42	7	8.03624	3.87658	1	84	84	75.9638
42	7	12.0725	3.6075	1	119	119	106.928
42	7	3.83086	4.48796	1	140	140	136.169
42	7	4.30485	4.35072	1	219	219	34.6952
42	7	13.0362	5.46274	1	81	81	67.9638
42	7	8	3.16869	1	172	172	0
42	7	9.67686	3.42896	1	255	255	65.3231
42	7	14.6538	2.67038	1	175	175	160.346
42	7	3.00538	8.20483	1	196	196	12.9946
42	7	6.59464	4.19765	1	224	224	37.4054
43	7	5.34988	1.86486	1	23	23	17.6501
43	7	5.01836	2.08354	1	260	260	74.9816
43	7	10.2249	1.86967	1	170	170	159.775
43	7	7.62356	2.3562	1	197	197	24.6236
43	7	4.35899	1.33224	1	105	105	109.359
43	7	0.567904	2.5524	1	268	268	88.5679
43	7	9.2643	1.63211	1	56	56	46.7357
43	7	7.20112	1.82601	1	162	162	154.799
43	7	3.23483	1.63523	1	124	124	127.235
43	7	8.14554	1.87298	1	164	164	155.854
43	7	10.6075	1.1955	1	249	249	58.3925
43	7	0.797402	2.57647	1	222	222	42.7974
43	7	6.90972	2.97692	1	151	151	144.09
43	7	2.06433	3.26573	1	85	85	87.0643
43	7	4.07208	1.80814	1	22	22	17.9279
43	7	2.03624	2.84907	1	147	147	149.036
43	7	2.18111	1.62784	1	155	155	152.819
43	7	9.48601	2.0848	1	239	239	49.514
43	7	7.90477	3.82748	1	152	152	159.905
43	7	7.42957	1.42114	1	114	114	121.43
43	7	1.72436	1.62634	1	34	34	32.2756
43	7	66	7.14825	1	69	69	135
43	7	2.56717	2.14357	1	68	68	65.4328
43	7	3.30485	1.34783	1	218	218	34.6952
43	7	21.8108	2.0316	1	277	277	118.811
43	7	3.65222	2.55712	1	90	90	93.6522
43	7	2.40886	2.38907	1	229	229	46.5911
43	7	2.13402	1.85006	1	214	214	31.866
43	7	0.3141	1.59204	1	130	130	130.314
43	7	6.00335	1.32476	1	250	250	63.9967
44	7	1.27772	4.35571	1	204	204	25.2777
44	7	6.17551	1.48388	1	274	274	100.176
44	7	8.25644	1.5706	1	68	68	59.7436
44	7	7.12401	0.349601	1	172	172	164.876
44	7	0.47246	0.367192	1	141	141	140.528
44	7	0	3.09022	1	225	225	45
44	7	1.35583	0.320858	1	176	176	174.644
44	7	12.5288	3.15284	1	135	135	122.471
44	7	0.537678	4.97307	1	80	80	80.5377
44	7	2.43495	2.95469	1	151	151	153.435
44	7	7.56505	0.361361	1	206	206	18.4349
44	7	2.09476	1.63331	1	80	80	77.9052
44	7	3.08562	13.4227	1	179	179	175.914
44	7	1.92751	1.71111	1	240	240	61.9275
44	7	0.194429	3.35963	1	85	85	84.8056
44	7	0.309932	5.27903	1	259	259	78.6901
44	7	5.38954	3.01489	1	214	214	28.6105
44	7	20.3402	3.75516	1	121	121	141.34
44	7	2.28688	1.04325	1	238	238	55.7131
44	7	8.69007	0.687606	1	155	155	146.31
44	7	4.0679	0.630746	1	27	27	22.9321
44	7	3.56505	0.732355	1	247	247	63.4349
44	7	3.87498	2.11361	1	169	169	172.875
44	7	5.56505	0.376389	1	159	159	153.435
44	7	4.93151	0.601107	1	110	110	105.068
44	7	0.27303	0.466148	1	46	46	46.273
44	7	0	0.300809	1	225	225	45
44	7	0.945396	0.321204	1	195	195	15.9454
44	7	2.34988	0.338133	1	200	200	17.6501
44	7	0.15239	2.80155	1	268	268	88.1524
45	7	12.6713	4.3563	1	179	179	166.329
45	7	12.3801	1.23641	1	260	260	67.6199
45	7	1.02549	1.83424	1	158	158	156.975
45	7	1.43141	1.10413	1	129	129	127.569
45	7	8.04094	1.80306	1	87	87	78.9591
45	7	5.89242	2.15622	1	134	134	128.108
45	7	3.00538	1.57241	1	151	151	147.995
45	7	11.0184	2.37258	1	94	94	105.018
45	7	3.8787	2.30081	1	31	31	27.1213
45	7	0.911128	1.27151	1	190	190	10.9111
45	7	12.7662	1.87461	1	231	231	38.2338
45	7	4.45184	1.29262	1	129	129	133.452
45	7	0.392498	1.92344	1	122	122	121.608
45	7	6.0546	1.931	1	157	157	150.945
45	7	3.85902	1.36694	1	154	154	150.141
45	7	13.5651	1.42747	1	283	283	116.565
45	7	4.34146	1.33294	1	50	50	45.6585
45	7	5.61932	1.20481	1	308	308	122.381
45	7	4.02959	1.74983	1	158	158	153.97
45	7	5.33909	1.83374	1	142	142	147.339
45	7	4.47589	1.4274	1	160	160	164.476
45	7	4.99462	1.96505	1	188	188	12.9946
45	7	10.6903	1.28156	1	125	125	135.69
45	7	12.0284	1.69599	1	50	50	37.9716
45	7	1.32359	2.24323	1	143	143	144.324
45	7	10.1118	1.77729	1	57	57	46.8882
45	7	3.30195	3.74545	1	178	178	1.30195
45	7	6.11483	2.08553	1	251	251	64.8852
45	7	1.93953	1.68433	1	200	200	18.0605
45	7	0.758541	1.97913	1	333	333	152.241
46	7	8.40758	1.43604	1	161	161	152.592
46	7	1.34019	1.64962	1	175	175	173.66
46	7	2.69007	1.42792	1	166	166	168.69
46	7	7.68038	1.42104	1	85	85	77.3196
46	7	11.9946	1.69869	1	46	46	57.9946
46	7	3.56505	2.02987	1	113	113	116.565
46	7	4.63411	1.36734	1	122	122	126.634
46	7	11.1416	1.65989	1	197	197	28.1416
46	7	12.6561	2.00176	1	246	246	53.3439
46	7	4.87599	1.89113	1	205	205	29.876
46	7	10.2532	2.00564	1	195	195	25.2532
46	7	3.51125	2.59064	1	205	205	28.5112
46	7	5.82982	2.24344	1	123	123	128.83
46	7	15.5713	2.16207	1	264	264	68.4287
46	7	12.859	2.44219	1	73	73	60.141
46	7	0.762391	2.77599	1	179	179	178.238
46	7	0.962489	2.26446	1	157	157	156.038
46	7	2.92625	1.95865	1	218	218	35.0738
46	7	1.8699	2.49503	1	215	215	36.8699
46	7	7.74406	2.92176	1	52	52	44.2559
46	7	3.89079	3.03714	1	152	152	148.109
46	7	0.726311	2.25964	1	268	268	87.2737
46	7	4.84031	2.62565	1	174	174	169.16
46	7	1.37625	2.07508	1	284	284	105.376
46	7	5.40886	2.84942	1	218	218	43.4089
46	7	9.34109	2.44391	1	255	255	65.6589
46	7	6.09476	1.56908	1	276	276	102.095
46	7	0.474432	1.43046	1	108	108	107.526
46	7	2.8699	2.10333	1	146	146	143.13
46	7	5.43495	2.23781	1	212	212	26.5651

## Sheet: RRMS
Subject_ID	Block_ID	Response_Error (degree)	Reaction_Time (seconds)	Target_Bar	Bar_1_Orientation (degree)	Target_Bar_Orientation (degree)	Subject_Response_Orientation (degree)
1	7	15.9831	3.43302	1	94	94	109.983
1	7	6.65981	3.99421	1	302	302	128.66
1	7	20.9575	4.15902	1	199	199	39.9575
1	7	26.8476	4.29082	1	200	200	46.8476
1	7	32.0284	5.79693	1	70	70	37.9716
1	7	20.7108	3.65024	1	110	110	130.711
1	7	1.97613	3.08374	1	35	35	33.0239
1	7	6.65989	3.77079	1	183	183	9.65989
1	7	16.0309	4.31116	1	214	214	17.9691
1	7	17.0725	1.99464	1	101	101	118.072
1	7	3.14434	5.0153	1	148	148	151.144
1	7	16.8141	2.63662	1	122	122	138.814
1	7	31.3257	2.4744	1	292	292	143.326
1	7	2.0546	4.82884	1	162	162	164.055
1	7	2.1523	2.80639	1	165	165	167.152
1	7	1.38954	2.90343	1	165	165	163.61
1	7	9.25512	3.93419	1	174	174	164.745
1	7	9.61932	2.42963	1	318	318	147.619
1	7	37.0283	19.7596	1	168	168	130.972
1	7	28.0818	2.97527	1	77	77	48.9182
1	7	4.61069	2.98346	1	215	215	39.6107
1	7	36.8324	3.84008	1	114	114	150.832
1	7	31.6013	6.06987	1	9	9	40.6013
1	7	16.2184	2.98419	1	150	150	166.218
1	7	6.52523	3.26865	1	156	156	162.525
1	7	0.556045	3.40753	1	20	20	20.556
1	7	6.29005	1.62381	1	283	283	109.29
1	7	10.211	2.6654	1	89	89	99.211
1	7	10.0952	1.87199	1	260	260	69.9048
1	7	4.81407	2.32223	1	226	226	41.1859
2	7	29.0013	2.84542	1	67	67	37.9987
2	7	12.7495	2.17874	1	191	191	23.7495
2	7	3.91908	3.01941	1	230	230	46.0809
2	7	1.86581	2.14057	1	143	143	144.866
2	7	4.93151	2.61628	1	155	155	150.068
2	7	4.40742	2.41409	1	172	172	167.593
2	7	2.50427	1.88314	1	241	241	58.4957
2	7	0.562525	2.82584	1	191	191	10.4375
2	7	1.99462	2.22741	1	169	169	167.005
2	7	4.68937	2.61283	1	142	142	146.689
2	7	2.99462	2.50636	1	190	190	12.9946
2	7	6.30993	3.54583	1	175	175	168.69
2	7	10.179	3.35753	1	171	171	160.821
2	7	5.43495	3.93354	1	193	193	18.4349
2	7	4.83086	2.13327	1	141	141	136.169
2	7	0.634114	2.05236	1	144	144	143.366
2	7	4.03624	1.7351	1	170	170	165.964
2	7	3.81407	2.11049	1	45	45	41.1859
2	7	0.814075	1.98204	1	222	222	41.1859
2	7	15.4349	2.59068	1	93	93	108.435
2	7	5.1759	2.57966	1	213	213	27.8241
2	7	7.60256	2.1843	1	130	130	137.603
2	7	4.69924	2.08911	1	102	102	106.699
2	7	0.340192	2.45157	1	219	219	38.6598
2	7	8.35775	1.24537	1	249	249	60.6422
2	7	2.57633	5.51964	1	181	181	3.57633
2	7	11.1211	3.63514	1	36	36	47.1211
2	7	6.07357	3.95252	1	35	35	28.9264
2	7	5.0546	2.98463	1	111	111	105.945
2	7	4.30993	1.50558	1	83	83	78.6901
3	7	23.6028	11.7955	1	115	115	91.3972
3	7	18.3844	1.66834	1	108	108	126.384
3	7	2.60256	1.66635	1	225	225	47.6026
3	7	6.63354	1.84864	1	235	235	48.3665
3	7	5.93151	2.74653	1	114	114	119.932
3	7	16.0274	1.47861	1	250	250	53.9726
3	7	9.35402	1.30512	1	82	82	72.646
3	7	3.11342	1.39236	1	238	238	61.1134
3	7	5.69515	3.28523	1	164	164	169.695
3	7	7.40758	1.66791	1	70	70	62.5924
3	7	11.0948	2.79434	1	136	136	147.095
3	7	3.99099	3.51499	1	35	35	38.991
3	7	2.75854	3.36209	1	155	155	152.241
3	7	7.43495	1.69405	1	259	259	71.5651
3	7	1.7843	4.0011	1	54	54	55.7843
3	7	13.047	2.02582	1	155	155	141.953
3	7	3.29016	1.9394	1	215	215	38.2902
3	7	6.17983	2.59128	1	132	132	138.18
3	7	6.38034	2.30841	1	118	118	124.38
3	7	4	0.307453	1	86	86	90
3	7	1	0.295515	1	89	89	90
3	7	3	0.286048	1	273	273	90
3	7	25.5377	2.26893	1	190	190	35.5377
3	7	4.55967	4.60756	1	125	125	129.56
3	7	8.44774	1.58463	1	167	167	158.552
3	7	25.1301	1.55313	1	242	242	36.8699
3	7	83	1.64912	1	187	187	90
3	7	21.0546	2.49118	1	172	172	150.945
3	7	1.6559	1.53814	1	157	157	155.344
3	7	7.44719	1.33788	1	215	215	27.5528
4	7	7.94149	14.0897	1	186	186	178.059
4	7	3.5198	2.7556	1	138	138	141.52
4	7	12.6995	1.89177	1	75	75	62.3005
4	7	10.2457	5.47422	1	172	172	2.24574
4	7	6.65067	3.37296	1	246	246	59.3493
4	7	10.0306	1.84537	1	227	227	57.0306
4	7	47	2.11921	1	43	43	90
4	7	4.12502	2.99473	1	177	177	172.875
4	7	6.61406	4.0877	1	189	189	2.38594
4	7	7.14554	3.94233	1	152	152	159.146
4	7	19.0309	4.13818	1	143	143	162.031
4	7	22.7595	5.13799	1	99	99	121.759
4	7	8	4.88534	1	172	172	0
4	7	5.59229	3.29189	1	164	164	169.592
4	7	23.4712	15.0629	1	324	324	167.471
4	7	10.9298	4.94088	1	202	202	11.0702
4	7	15.1986	5.72045	1	278	278	113.199
4	7	16.2277	2.16368	1	262	262	65.7723
4	7	16.4099	2.60006	1	266	266	69.5901
4	7	9.78075	2.3772	1	174	174	164.219
4	7	11.6901	1.88986	1	248	248	56.3099
4	7	21.4275	3.36051	1	98	98	119.427
4	7	57.4349	10.6327	1	231	231	108.435
4	7	44	4.0617	1	226	226	90
4	7	48	1.05209	1	222	222	90
4	7	88	3.19	1	178	178	90
4	7	5.09555	3.02673	1	158	158	152.904
4	7	71	3.1085	1	161	161	90
4	7	7	1.0357	1	263	263	90
4	7	50	3.08948	1	220	220	90
5	7	8	3.65546	1	307	307	135
5	7	1.50427	1.97705	1	105	105	103.496
5	7	3.14479	2.71346	1	203	203	19.8552
5	7	5.70995	1.97708	1	115	115	109.29
5	7	1	0.20947	1	91	91	90
5	7	2.8699	5.23588	1	169	169	171.87
5	7	0.784298	1.72471	1	305	305	124.216
5	7	0.427802	2.03218	1	276	276	95.5722
5	7	3.90614	1.69777	1	182	182	5.90614
5	7	0.530766	1.78877	1	82	82	81.4692
5	7	1.20047	2.36955	1	191	191	12.2005
5	7	9.22567	1.60595	1	120	120	129.226
5	7	1.74681	1.53517	1	216	216	37.7468
5	7	6.39718	2.14308	1	320	320	133.603
5	7	0.83874	1.49092	1	293	293	113.839
5	7	1.71059	1.8256	1	184	184	5.71059
5	7	4.55226	2.24205	1	161	161	156.448
5	7	2.44033	1.87689	1	177	177	174.56
5	7	1.38014	1.34338	1	111	111	112.38
5	7	13.5651	1.53111	1	58	58	71.5651
5	7	6.43495	2.1149	1	258	258	71.5651
5	7	6.19859	1.49027	1	152	152	158.199
5	7	1.30993	1.17712	1	170	170	168.69
5	7	0	0.177672	1	270	270	90
5	7	6.4278	1.21827	1	102	102	95.5722
5	7	7.01689	2.82383	1	207	207	19.9831
5	7	4.25644	2.99329	1	199	199	14.7436
5	7	11.8557	1.02226	1	62	62	73.8557
5	7	11.5275	1.22368	1	51	51	39.4725
5	7	6.32314	2.52164	1	149	149	155.323
6	7	21.2645	6.23026	1	142	142	120.735
6	7	5.67547	5.12693	1	161	161	166.675
6	7	2.3925	3.51443	1	146	146	148.392
6	7	0.700428	2.73847	1	62	62	62.7004
6	7	5.53768	1.83399	1	120	120	125.538
6	7	4.2072	1.84775	1	145	145	140.793
6	7	4.80557	3.87351	1	170	170	174.806
6	7	4.57043	2.25249	1	234	234	58.5704
6	7	4.88517	4.28638	1	60	60	64.8852
6	7	5.03624	0.41296	1	279	279	104.036
6	7	0.869898	1.95082	1	126	126	126.87
6	7	3.55967	1.75496	1	306	306	129.56
6	7	7.17901	1.56277	1	102	102	109.179
6	7	9.40719	0.415359	1	155	155	164.407
6	7	4.46082	2.4122	1	195	195	10.5392
6	7	2.59242	5.22563	1	210	210	27.4076
6	7	6.37625	2.83483	1	279	279	105.376
6	7	0.753887	3.76878	1	190	190	9.24611
6	7	4.36246	1.89308	1	239	239	54.6375
6	7	7.00887	2.69654	1	151	151	158.009
6	7	2.19859	1.72336	1	69	69	66.8014
6	7	3.67547	2.60668	1	253	253	76.6755
6	7	3.42746	1.71978	1	116	116	119.427
6	7	2.9228	1.70797	1	127	127	124.077
6	7	2.81889	0.914157	1	60	60	62.8189
6	7	0.289407	2.97739	1	39	39	39.2894
6	7	2.19573	2.47447	1	285	285	102.804
6	7	9.70043	3.46872	1	53	53	62.7004
6	7	0.676393	2.26339	1	104	104	104.676
6	7	0.869898	1.66202	1	324	324	143.13
7	7	5	3.37853	1	265	265	90
7	7	4.48461	4.20313	1	180	180	175.515
7	7	1.26477	2.48744	1	146	146	147.265
7	7	15.5923	1.63013	1	289	289	124.592
7	7	8.09582	1.66395	1	117	117	125.096
7	7	3.03624	2.61426	1	79	79	75.9638
7	7	17.7447	2.49165	1	45	45	62.7447
7	7	7.95406	2.46606	1	93	93	100.954
7	7	5.92792	2.40852	1	192	192	17.9279
7	7	18.0054	2.36977	1	284	284	122.005
7	7	2.38522	3.5022	1	204	204	21.6148
7	7	1.2026	2.90503	1	44	44	42.7974
7	7	11.8584	1.90417	1	275	275	106.858
7	7	5.77514	5.26324	1	19	19	24.7751
7	7	7.65981	1.55408	1	59	59	51.3402
7	7	7.42077	1.76589	1	187	187	14.4208
7	7	2.75117	1.73037	1	167	167	164.249
7	7	16.7223	2.34597	1	138	138	154.722
7	7	0.194056	2.71765	1	204	204	23.8059
7	7	2.00538	3.01733	1	210	210	32.0054
7	7	0.339087	2.15872	1	192	192	12.3391
7	7	6.79888	3.05872	1	212	212	25.2011
7	7	5.29957	2.32895	1	157	157	162.3
7	7	18.1759	2.27259	1	226	226	27.8241
7	7	4.79888	1.97113	1	30	30	25.2011
7	7	13.1986	3.13918	1	35	35	21.8014
7	7	4.78241	1.59965	1	85	85	80.2176
7	7	7.82089	2.60843	1	148	148	155.821
7	7	4.71744	3.46915	1	155	155	159.717
7	7	0.815084	2.4154	1	230	230	49.1849
8	7	14.0128	5.42132	1	146	146	131.987
8	7	38.4831	13.0297	1	167	167	128.517
8	7	9.70864	3.64335	1	219	219	29.2914
8	7	24.0239	3.88908	1	99	99	123.024
8	7	3.55997	7.73557	1	247	247	70.56
8	7	1.19349	2.71919	1	180	180	1.19349
8	7	0.111342	3.31453	1	78	78	78.1113
8	7	11.7995	1.90578	1	159	159	147.2
8	7	1.31385	2.50512	1	240	240	61.3139
8	7	37	2.83607	1	188	188	45
8	7	0.500654	2.42563	1	52	52	51.4993
8	7	24.2564	7.16364	1	186	186	30.2564
8	7	16.3844	3.4478	1	160	160	143.616
8	7	14.3706	3.12169	1	173	173	158.629
8	7	5.17851	2.20512	1	118	118	123.179
8	7	3.29215	2.39018	1	37	37	40.2921
8	7	5.39293	4.36691	1	87	87	81.6071
8	7	0.847578	1.85923	1	297	297	117.848
8	7	18.778	5.38553	1	180	180	161.222
8	7	5.24247	4.48997	1	198	198	12.7575
8	7	6.10376	12.4523	1	168	168	161.896
8	7	0.963757	6.69404	1	165	165	165.964
8	7	75.6526	9.41688	1	162	162	57.6526
8	7	1.06433	2.894	1	139	139	137.936
8	7	3.56505	1.88092	1	157	157	153.435
8	7	3.12472	5.6637	1	153	153	156.125
8	7	0.634114	5.76557	1	171	171	171.634
8	7	5.52316	2.89811	1	143	143	148.523
8	7	1	0.724793	1	269	269	90
8	7	11.4692	2.08165	1	155	155	143.531
9	7	15.3058	2.23871	1	217	217	52.3058
9	7	2.72631	2.52792	1	225	225	47.7263
9	7	13.8189	2.67933	1	86	86	72.1811
9	7	8.50427	1.85857	1	68	68	76.5043
9	7	8.21759	1.61267	1	297	297	125.218
9	7	0.172553	1.52203	1	148	148	148.173
9	7	13.7723	1.98946	1	277	277	110.772
9	7	1.01279	2.36289	1	178	178	176.987
9	7	21.0939	1.66241	1	108	108	129.094
9	7	22.4725	1.40462	1	197	197	39.4725
9	7	15.156	1.16582	1	115	115	130.156
9	7	9.12502	1.85	1	227	227	37.875
9	7	4.02387	1.32431	1	241	241	56.9761
9	7	19.56	1.44793	1	84	84	64.44
9	7	32.8699	1.5537	1	94	94	126.87
9	7	9.61046	1.49019	1	19	19	28.6105
9	7	2.10273	1.4088	1	150	150	152.103
9	7	17.556	1.74598	1	87	87	69.444
9	7	12.3493	1.45398	1	223	223	30.6507
9	7	5.2643	1.74386	1	308	308	133.264
9	7	7.91084	1.75603	1	220	220	47.9108
9	7	12.7683	1.33194	1	226	226	33.2317
9	7	5.80679	1.4517	1	165	165	159.193
9	7	8.8789	1.38179	1	56	56	47.1211
9	7	34.3645	1.47886	1	264	264	49.6355
9	7	22.9872	1.31303	1	251	251	48.0128
9	7	15.8428	1.52855	1	189	189	173.157
9	7	1.86581	1.70422	1	172	172	170.134
9	7	13.4349	1.5115	1	85	85	71.5651
9	7	38.3803	1.45509	1	49	49	10.6197
10	7	1.04094	3.26175	1	170	170	168.959
10	7	16.9245	2.21521	1	319	319	155.925
10	7	6.77225	1.61306	1	31	31	24.2277
10	7	9.04163	1.03426	1	307	307	136.042
10	7	1.25644	2.37692	1	286	286	104.744
10	7	7.53768	1.25671	1	208	208	35.5377
10	7	6.9454	1.08673	1	234	234	60.9454
10	7	10.4712	1.17321	1	158	158	147.529
10	7	4.65382	1.09789	1	210	210	25.3462
10	7	7.19443	1.18852	1	47	47	39.8056
10	7	11.4181	1.45012	1	297	297	128.418
10	7	8.40536	0.884952	1	119	119	127.405
10	7	6.27369	1.07511	1	144	144	137.726
10	7	12.2176	0.837236	1	247	247	54.7824
10	7	10.2072	1.0203	1	119	119	129.207
10	7	2	1.7494	1	178	178	0
10	7	17.1613	2.33283	1	139	139	156.161
10	7	2.62356	1.10874	1	203	203	20.3764
10	7	1	3.6438	1	179	179	0
10	7	0.38954	1.64989	1	196	196	16.3895
10	7	7.57043	1.28482	1	39	39	31.4296
10	7	8.61046	2.06703	1	290	290	118.61
10	7	15.8586	2.21337	1	136	136	120.141
10	7	8.08916	1.55571	1	214	214	42.0892
10	7	1.91438	2.29311	1	174	174	175.914
10	7	5.38076	1.37543	1	97	97	102.381
10	7	1.43495	0.942808	1	118	118	116.565
10	7	8.10273	0.995243	1	279	279	107.103
10	7	0.462322	2.78424	1	171	171	170.538
10	7	2.49573	1.43661	1	169	169	166.504
11	7	6.20397	1.84968	1	274	274	100.204
11	7	9.43495	1.07541	1	171	171	161.565
11	7	2.81556	1.47369	1	135	135	132.184
11	7	3.61932	1.30812	1	144	144	147.619
11	7	2.03551	1.56374	1	37	37	39.0355
11	7	6.42869	1.78414	1	242	242	68.4287
11	7	7.70696	1.42041	1	174	174	166.293
11	7	5.59934	1.41359	1	225	225	50.5993
11	7	1.43283	1.31497	1	296	296	114.567
11	7	1.76364	1.80214	1	138	138	139.764
11	7	7.31791	1.62749	1	14	14	21.3179
11	7	6.0284	1.18882	1	46	46	52.0284
11	7	9.50744	2.32203	1	143	143	133.493
11	7	4.76617	1.53344	1	47	47	51.7662
11	7	3.69139	1.41324	1	225	225	48.6914
11	7	1.35583	1.55448	1	221	221	39.6442
11	7	10.0958	1.64271	1	155	155	144.904
11	7	5.30993	1.29647	1	174	174	168.69
11	7	5.90594	1.98762	1	144	144	138.094
11	7	2.40758	1.93627	1	290	290	107.592
11	7	1.88609	1.5043	1	298	298	116.114
11	7	7.76079	1.31143	1	174	174	166.239
11	7	9	1.05476	1	324	324	135
11	7	6.9454	1.20095	1	54	54	60.9454
11	7	3.11483	2.73009	1	248	248	64.8852
11	7	14.0818	1.31376	1	153	153	138.918
11	7	6.53768	1.74484	1	151	151	144.462
11	7	11.6732	1.29287	1	222	222	53.6732
11	7	8.42957	1.04768	1	113	113	121.43
11	7	3.42594	1.93013	1	234	234	57.4259
12	7	2.46909	2.99821	1	177	177	174.531
12	7	8.76272	1.55945	1	248	248	59.2373
12	7	11.1416	1.89541	1	163	163	151.858
12	7	13	2.01826	1	212	212	45
12	7	25.7928	5.84763	1	155	155	129.207
12	7	10.6995	1.60964	1	287	287	117.699
12	7	0.273689	4.92644	1	222	222	42.2737
12	7	3	1.28579	1	183	183	0
12	7	12.0128	2.06876	1	216	216	48.0128
12	7	6.96249	3.31446	1	197	197	23.9625
12	7	5.7639	1.78633	1	310	310	135.764
12	7	83.7086	2.39917	1	203	203	119.291
12	7	39.3808	2.31233	1	207	207	167.619
12	7	4.55605	2.56752	1	241	241	65.556
12	7	5.46335	2.26782	1	200	200	25.4633
12	7	16.444	2.0262	1	98	98	114.444
12	7	1.17851	1.78005	1	148	148	146.821
12	7	9.57633	1.62044	1	129	129	138.576
12	7	13.3141	2.06567	1	153	153	139.686
12	7	2.66091	2.08537	1	240	240	57.3391
12	7	17.0506	2.94723	1	280	280	117.051
12	7	17.4956	1.51905	1	79	79	61.5044
12	7	81.8807	3.41098	1	163	163	81.1193
12	7	4.01689	2.33594	1	246	246	70.0169
12	7	22.6507	2.30358	1	240	240	37.3493
12	7	33.0546	4.42278	1	221	221	74.0546
12	7	6.52971	1.91597	1	114	114	120.53
12	7	14.9908	1.89551	1	268	268	73.0092
12	7	5.2184	1.45029	1	64	64	58.7816
12	7	17.3391	2.13231	1	50	50	32.6609
13	7	1.21759	4.1023	1	236	236	54.7824
13	7	4.01935	2.46507	1	120	120	124.019
13	7	10.9716	3.14727	1	153	153	142.028
13	7	37	4.09491	1	188	188	45
13	7	18.9061	4.13004	1	58	58	39.0939
13	7	25.4275	6.84952	1	94	94	119.427
13	7	1.69379	4.16773	1	24	24	22.3062
13	7	17.0546	2.55967	1	102	102	119.055
13	7	12.7436	8.21583	1	133	133	120.256
13	7	20.8377	2.54088	1	165	165	144.162
13	7	14.5713	5.35283	1	97	97	111.571
13	7	19.9645	3.52866	1	149	149	129.036
13	7	9.0546	2.52051	1	110	110	119.055
13	7	9.23383	10.508	1	209	209	38.2338
13	7	17.5297	2.14688	1	77	77	59.4703
13	7	20	3.31062	1	25	25	45
13	7	7.07375	2.69416	1	197	197	9.92625
13	7	20.6071	2.30502	1	196	196	36.6071
13	7	29.5377	3.35226	1	96	96	125.538
13	7	3.43283	2.54434	1	242	242	65.4328
13	7	2.94347	3.96422	1	175	175	172.057
13	7	8.03039	3.51257	1	164	164	172.03
13	7	11.9946	2.31959	1	224	224	32.0054
13	7	11.6366	2.65102	1	125	125	136.637
13	7	64.3558	2.77322	1	76	76	140.356
13	7	0.0342856	1.43358	1	18	18	18.0343
13	7	0.905243	1.77912	1	212	212	32.9052
13	7	2.21009	2.36402	1	319	319	136.79
13	7	8.19443	3.89613	1	48	48	39.8056
13	7	20.2777	3.14739	1	5	5	25.2777
14	7	10.294	3.17003	1	141	141	151.294
14	7	2.09523	2.57032	1	198	198	20.0952
14	7	9.39871	1.78191	1	130	130	139.399
14	7	11.3402	2.01544	1	230	230	38.6598
14	7	1.23171	1.84396	1	193	193	11.7683
14	7	0.792796	1.70576	1	140	140	140.793
14	7	10.2307	1.54215	1	81	81	70.7693
14	7	15.0283	2.42631	1	124	124	139.028
14	7	2.25512	2.43577	1	212	212	29.7449
14	7	2.11934	1.68958	1	304	304	126.119
14	7	11.9059	1.7923	1	120	120	131.906
14	7	13.46	3.18932	1	93	93	106.46
14	7	3.62938	2.0499	1	200	200	23.6294
14	7	12.7352	1.75634	1	70	70	57.2648
14	7	8.96449	2.03633	1	48	48	39.0355
14	7	15.7263	1.93033	1	238	238	42.2737
14	7	20.8108	2.21003	1	98	98	118.811
14	7	3.14663	2.3991	1	222	222	38.8534
14	7	4.55707	2.12853	1	147	147	151.557
14	7	15.3493	2.13618	1	112	112	127.349
14	7	7.52881	2.19982	1	175	175	167.471
14	7	7.61966	1.96095	1	138	138	145.62
14	7	0.463345	1.94091	1	205	205	25.4633
14	7	6.41297	2.41261	1	165	165	158.587
14	7	5.01311	2.37017	1	45	45	39.9869
14	7	10.8265	2.07832	1	221	221	30.1735
14	7	7.76364	2.75281	1	177	177	4.76364
14	7	12.5713	1.64111	1	261	261	68.4287
14	7	13.008	1.71059	1	183	183	169.992
14	7	13.1213	1.65489	1	256	256	62.8787
15	7	58	7.00397	1	212	212	90
15	7	4.90651	3.42054	1	159	159	154.093
15	7	10.7106	2.14542	1	230	230	39.2894
15	7	3.16235	2.14983	1	186	186	9.16235
15	7	15.5819	2.7054	1	234	234	38.4181
15	7	27.2869	2.03286	1	97	97	124.287
15	7	31.5924	2.19874	1	59	59	27.4076
15	7	3.56505	2.90393	1	158	158	161.565
15	7	16.3972	1.83901	1	240	240	43.6028
15	7	24.1336	2.24488	1	50	50	25.8664
15	7	12.9315	2.90264	1	152	152	164.932
15	7	4.56013	3.28186	1	187	187	11.5601
15	7	15.4477	2.20066	1	96	96	111.448
15	7	22.4623	1.87382	1	238	238	35.5377
15	7	11.1986	2.3162	1	147	147	158.199
15	7	15.8699	2.16748	1	204	204	8.1301
15	7	3.55226	1.91604	1	205	205	21.4477
15	7	25.7603	1.40753	1	254	254	48.2397
15	7	16.7585	2.22049	1	146	146	162.759
15	7	31.5241	2.83392	1	119	119	150.524
15	7	0.84761	4.27138	1	179	179	178.152
15	7	16.2914	2.97019	1	148	148	164.291
15	7	13.4472	2.64651	1	139	139	152.447
15	7	23.8658	2.72858	1	121	121	144.866
15	7	51.9321	2.56029	1	286	286	157.932
15	7	60.2538	2.18417	1	111	111	171.254
15	7	7.25533	2.58497	1	160	160	152.745
15	7	20.9575	3.66907	1	109	109	129.958
15	7	6.09349	4.92793	1	167	167	160.907
15	7	20.1975	3.03146	1	81	81	60.8025
16	7	27.5704	3.60625	1	149	149	121.43
16	7	4.43141	2.89495	1	93	93	97.4314
16	7	5.8637	2.08206	1	206	206	20.1363
16	7	1.70864	1.69665	1	31	31	29.2914
16	7	0.760785	1.72366	1	193	193	13.7608
16	7	1.33314	2.93109	1	174	174	175.333
16	7	16.9279	2.01507	1	226	226	62.9279
16	7	15.8056	1.70379	1	204	204	39.8056
16	7	1.12502	2.86341	1	174	174	172.875
16	7	11.6237	2.3335	1	117	117	105.376
16	7	15.3099	3.6292	1	319	319	123.69
16	7	4.48955	1.86284	1	223	223	47.4896
16	7	3	3.38917	1	222	222	45
16	7	0.210089	2.58594	1	133	133	133.21
16	7	0.801409	1.99866	1	159	159	158.199
16	7	0.297145	1.69562	1	172	172	171.703
16	7	3.21103	1.4586	1	84	84	80.789
16	7	1.65254	1.53714	1	97	97	98.6525
16	7	0.863697	1.54491	1	294	294	114.864
16	7	0.90938	1.57296	1	45	45	45.9094
16	7	1.07961	2.1491	1	184	184	5.07961
16	7	1.00909	2.59297	1	185	185	3.99091
16	7	16.5463	3.7899	1	145	145	128.454
16	7	2.02053	1.59492	1	105	105	107.021
16	7	10.9395	2.07163	1	151	151	161.94
16	7	1.54098	3.19433	1	160	160	158.459
16	7	5.35745	3.40674	1	307	307	132.357
16	7	3.98852	1.73578	1	164	164	167.989
16	7	2.1301	1.46372	1	231	231	53.1301
16	7	5.00538	2.64619	1	207	207	32.0054
17	7	2.40536	3.22811	1	215	215	37.4054
17	7	3.80141	5.17327	1	342	342	158.199
17	7	2.8699	4.21777	1	214	214	36.8699
17	7	1.96376	9.8387	1	151	151	149.036
17	7	2.7398	3.31644	1	199	199	16.2602
17	7	6.35775	4.5116	1	203	203	29.3578
17	7	16.2906	6.663	1	59	59	42.7094
17	7	16.1213	5.45303	1	101	101	117.121
17	7	0	0.535076	1	90	90	90
17	7	8	3.90737	1	37	37	45
17	7	8.44003	4.76595	1	191	191	19.44
17	7	10.7512	8.29821	1	265	265	74.2488
17	7	14.2643	5.63697	1	151	151	136.736
17	7	13.4712	4.01058	1	251	251	57.5288
17	7	13.9869	3.29572	1	296	296	129.987
17	7	6.92792	2.47487	1	79	79	72.0721
17	7	12.4208	2.24552	1	88	88	75.5792
17	7	3.18497	3.2154	1	118	118	121.185
17	7	3.30576	2.19673	1	274	274	97.3058
17	7	5.15723	4.63349	1	192	192	6.84277
17	7	6.61966	7.35934	1	221	221	34.3803
17	7	0.47246	3.39144	1	51	51	50.5275
17	7	6.22486	3.63195	1	194	194	20.2249
17	7	3.47119	5.38523	1	164	164	167.471
17	7	8.99462	3.82603	1	139	139	147.995
17	7	19.1844	3.67521	1	113	113	132.184
17	7	12.7839	3.99832	1	230	230	62.7839
17	7	1	8.93498	1	224	224	45
17	7	7.19749	6.62668	1	157	157	164.197
17	7	3.29005	2.54377	1	196	196	19.29
18	7	12.727	4.21944	1	211	211	43.727
18	7	12.8789	2.57653	1	30	30	42.8789
18	7	15.3524	3.72945	1	217	217	52.3524
18	7	15.2176	2.10853	1	20	20	35.2176
18	7	6.18921	3.01162	1	35	35	28.8108
18	7	10.4692	2.01363	1	161	161	171.469
18	7	20.7995	2.04657	1	147	147	167.8
18	7	4.67131	5.5046	1	144	144	148.671
18	7	7.42608	4.20743	1	57	57	49.5739
18	7	0.0362269	3.09685	1	338	338	157.964
18	7	4.86598	2.46782	1	207	207	31.866
18	7	0	0.917916	1	270	270	90
18	7	1.09951	8.52593	1	265	265	86.0995
18	7	19.3099	4.537	1	217	217	56.3099
18	7	4.92751	4.38424	1	237	237	61.9275
18	7	8.91438	3.45253	1	122	122	130.914
18	7	3	9.97494	1	177	177	0
18	7	0.709837	2.8553	1	174	174	173.29
18	7	2.57131	3.5567	1	116	116	113.429
18	7	0.693795	3.42892	1	293	293	112.306
18	7	1.96571	3.3186	1	200	200	18.0343
18	7	6.57313	4.37774	1	283	283	109.573
18	7	2.69545	2.56212	1	198	198	20.6955
18	7	14.7723	5.46626	1	219	219	24.2277
18	7	3.56505	4.76868	1	202	202	18.4349
18	7	0.614056	2.44506	1	3	3	2.38594
18	7	3.58194	2.4471	1	132	132	128.418
18	7	5.47589	2.44895	1	111	111	105.524
18	7	0.699244	1.63509	1	331	331	151.699
18	7	7.96249	2.92143	1	299	299	111.038
19	7	9.20011	4.25819	1	197	197	26.2001
19	7	18.1292	0.316105	1	308	308	146.129
19	7	8.57313	5.87068	1	101	101	109.573
19	7	3.35899	6.18474	1	151	151	154.359
19	7	3.86192	4.16147	1	202	202	18.1381
19	7	1.9454	5.84134	1	194	194	15.9454
19	7	11.4993	9.99101	1	220	220	51.4993
19	7	7.61478	4.20351	1	149	149	156.615
19	7	2.19349	7.56479	1	91	91	88.8065
19	7	4.43623	4.12114	1	128	128	132.436
19	7	7.98311	5.70819	1	147	147	154.983
19	7	14	7.58728	1	239	239	45
19	7	3.00538	4.63653	1	241	241	57.9946
19	7	42.1554	9.74981	1	160	160	22.1554
19	7	0.864514	2.309	1	94	94	94.8645
19	7	1.2726	6.81251	1	98	98	99.2726
19	7	21.7456	3.03348	1	235	235	33.2544
19	7	1.29331	5.66359	1	172	172	170.707
19	7	25.9638	5.14964	1	220	220	14.0362
19	7	5.52411	7.41737	1	170	170	164.476
19	7	0.394796	3.67059	1	35	35	35.3948
19	7	2.00538	4.60883	1	120	120	122.005
19	7	1.82982	5.53005	1	262	262	83.8298
19	7	20.4735	5.32945	1	65	65	44.5265
19	7	3.96094	6.72473	1	89	89	92.9609
19	7	0.332212	6.62406	1	184	184	3.66779
19	7	5.47246	2.84171	1	214	214	39.4725
19	7	18.9314	3.49545	1	229	229	30.0686
19	7	3.82149	4.98638	1	188	188	11.8215
19	7	0.185925	5.76708	1	94	94	93.8141
20	7	15	3.294	1	210	210	45
20	7	13.9831	8.66487	1	84	84	70.0169
20	7	3.1301	3.69506	1	185	185	8.1301
20	7	6.47943	2.35357	1	119	119	112.521
20	7	0.0906196	1.90602	1	46	46	45.9094
20	7	19.1186	3.36113	1	295	295	134.119
20	7	5.85331	1.91699	1	227	227	52.8533
20	7	10.8108	2.24069	1	108	108	118.811
20	7	1.39871	9.05798	1	183	183	4.39871
20	7	11.8779	3.36844	1	120	120	131.878
20	7	0.910838	10.0728	1	313	313	132.089
20	7	12.1027	3.73439	1	275	275	107.103
20	7	4.44719	2.334	1	257	257	72.5528
20	7	18.4623	2.08146	1	216	216	54.4623
20	7	7.88609	1.48822	1	259	259	71.1139
20	7	16.5297	1.91552	1	104	104	120.53
20	7	15.7094	1.62569	1	333	333	137.291
20	7	6.46823	6.21971	1	132	132	138.468
20	7	10.8989	1.28466	1	109	109	119.899
20	7	2.71441	1.89934	1	250	250	67.2856
20	7	26.1859	1.71854	1	165	165	138.814
20	7	16.9638	2.30569	1	346	346	149.036
20	7	0.207204	2.29716	1	129	129	129.207
20	7	3.42367	2.94017	1	52	52	48.5763
20	7	1.09085	3.39976	1	183	183	1.90915
20	7	17.029	2.25719	1	207	207	44.029
20	7	38.8476	3.32729	1	98	98	136.848
20	7	6.68209	1.7191	1	62	62	68.6821
20	7	1.46232	3.24255	1	278	278	99.4623
20	7	10.3099	2.73607	1	181	181	11.3099
21	7	14.3099	1.68183	1	222	222	56.3099
21	7	5.00901	1.35585	1	224	224	38.991
21	7	14.4054	1.4762	1	247	247	52.5946
21	7	9.20047	2.22673	1	183	183	12.2005
21	7	5.04245	1.90432	1	90	90	84.9575
21	7	6.69007	1.55928	1	153	153	146.31
21	7	7.03751	2.15168	1	256	256	68.9625
21	7	2.30076	1.44004	1	296	296	118.301
21	7	14	2.38161	1	59	59	45
21	7	4.96571	2.11037	1	158	158	153.034
21	7	1.29957	2.02956	1	26	26	27.2996
21	7	3.69924	1.98312	1	148	148	151.699
21	7	21.2161	1.37577	1	276	276	117.216
21	7	9.81529	1.75227	1	317	317	127.185
21	7	4	1.52884	1	41	41	45
21	7	18.4477	5.35237	1	87	87	68.5523
21	7	14.844	1.83251	1	325	325	130.156
21	7	17.2397	1.18609	1	211	211	48.2397
21	7	24.3893	1.73491	1	116	116	140.389
21	7	5.8787	1.57494	1	147	147	152.879
21	7	18.9052	1.27949	1	256	256	57.0948
21	7	4.37644	1.49368	1	16	16	20.3764
21	7	4.69007	2.05672	1	196	196	11.3099
21	7	2.44003	1.48706	1	163	163	160.56
21	7	29.5085	1.44567	1	85	85	55.4915
21	7	0.0289781	1.76791	1	136	136	135.971
21	7	3.27369	1.98032	1	141	141	137.726
21	7	13.2602	2.1207	1	138	138	151.26
21	7	11.9638	2.14824	1	161	161	149.036
21	7	2.65981	3.24051	1	144	144	141.34
22	7	1.53999	2.26409	1	198	198	16.46
22	7	9.44003	1.92587	1	100	100	109.44
22	7	8.98311	1.56124	1	101	101	109.983
22	7	2.63754	2.90543	1	142	142	144.638
22	7	0.290163	2.00484	1	128	128	128.29
22	7	6.52886	4.07392	1	210	210	36.5289
22	7	3.64255	1.7643	1	226	226	42.3575
22	7	8.35402	2.48865	1	171	171	162.646
22	7	1.12502	2.02314	1	84	84	82.875
22	7	7.00538	3.13722	1	295	295	122.005
22	7	8.5312	2.09675	1	125	125	133.531
22	7	0.766175	2.34751	1	51	51	51.7662
22	7	5.34109	1.32792	1	109	109	114.341
22	7	8.12502	1.91132	1	91	91	82.875
22	7	3.72758	3.53452	1	174	174	170.272
22	7	2.97041	1.78216	1	16	16	18.9704
22	7	5	4.03094	1	230	230	45
22	7	0.0548138	2.56046	1	221	221	41.0548
22	7	3.53878	3.11261	1	26	26	29.5388
22	7	17.4915	1.92349	1	322	322	124.509
22	7	16.8852	2.19069	1	138	138	154.885
22	7	7.85521	1.21998	1	258	258	70.1448
22	7	0.12213	2.37743	1	132	132	131.878
22	7	0.00538321	2.26565	1	283	283	102.995
22	7	9.61069	1.86393	1	210	210	39.6107
22	7	10.6307	1.55874	1	130	130	140.631
22	7	9.84277	2.11073	1	132	132	141.843
22	7	5.41266	1.32586	1	202	202	16.5873
22	7	1.09284	1.75753	1	144	144	142.907
22	7	13.556	1.30949	1	277	277	110.556
23	7	6	4.23155	1	84	84	90
23	7	11.5014	3.70987	1	280	280	111.501
23	7	4.73523	2.49621	1	242	242	57.2648
23	7	7.37913	2.83532	1	203	203	30.3791
23	7	12.8403	2.40904	1	227	227	34.1597
23	7	13.0284	1.93814	1	129	129	142.028
23	7	13.5085	1.76263	1	159	159	145.491
23	7	7.1155	2.76259	1	136	136	128.884
23	7	1.72556	1.92695	1	161	161	159.274
23	7	3.4885	1.83072	1	327	327	150.489
23	7	15.2176	1.85636	1	110	110	125.218
23	7	3	1.81407	1	222	222	45
23	7	14.4956	1.84359	1	256	256	61.5044
23	7	24.4362	1.489	1	288	288	132.436
23	7	8.4802	1.45582	1	150	150	141.52
23	7	9.92751	2.11424	1	187	187	16.9275
23	7	21.3058	1.75337	1	121	121	142.306
23	7	9.04094	1.1936	1	88	88	78.9591
23	7	2.46923	2.0067	1	281	281	98.5308
23	7	12.8014	2.03958	1	144	144	156.801
23	7	7.43495	1.66964	1	214	214	26.5651
23	7	1.96914	2.61593	1	196	196	17.9691
23	7	1	1.35739	1	269	269	90
23	7	1.97263	4.78163	1	97	97	98.9726
23	7	0.59114	1.99013	1	136	136	136.591
23	7	10.9638	2.04298	1	250	250	59.0362
23	7	3.46554	1.50474	1	207	207	30.4655
23	7	18.8882	1.4398	1	118	118	136.888
23	7	22.5752	1.51857	1	124	124	146.575
23	7	5.18921	1.2014	1	124	124	118.811
24	7	10.7449	2.70198	1	199	199	29.7449
24	7	10.4349	0.425407	1	188	188	18.4349
24	7	5.86241	8.36599	1	177	177	2.86241
24	7	18.1247	0.537839	1	82	82	100.125
24	7	18.3322	0.426907	1	208	208	46.3322
24	7	9.50427	2.68411	1	292	292	121.504
24	7	29.5651	0.771051	1	87	87	116.565
24	7	20.3524	0.552353	1	167	167	7.35238
24	7	7.52557	2.17021	1	170	170	162.474
24	7	0.432096	0.558848	1	271	271	91.4321
24	7	24.0796	0.481676	1	161	161	5.07961
24	7	24.4474	0.327484	1	114	114	138.447
24	7	1.87498	0.550301	1	99	99	97.125
24	7	13.4349	0.289072	1	95	95	108.435
24	7	0.364537	0.506608	1	265	265	85.3645
24	7	2.30621	1.64904	1	110	110	112.306
24	7	15.7927	4.28302	1	167	167	2.7927
24	7	13.4349	0.609673	1	95	95	108.435
24	7	8.39871	0.512754	1	176	176	4.39871
24	7	8.06081	0.37497	1	126	126	134.061
24	7	4.1363	0.440262	1	74	74	69.8637
24	7	39.9816	0.469923	1	170	170	29.9816
24	7	5.79278	0.438647	1	211	211	36.7928
24	7	4.77514	4.49118	1	160	160	155.225
24	7	6.36246	2.4736	1	164	164	170.362
24	7	6.52411	0.388141	1	279	279	105.524
24	7	14.009	0.423191	1	217	217	51.009
24	7	0.524111	0.408327	1	255	255	74.4759
24	7	66.1572	14.8811	1	152	152	38.1572
24	7	0.830315	1.73466	1	135	135	134.17
25	7	10.7355	2.19918	1	20	20	30.7355
25	7	6.43495	1.81582	1	213	213	26.5651
25	7	5.85316	1.20921	1	103	103	108.853
25	7	4.22486	1.16588	1	119	119	114.775
25	7	10.1301	1.74649	1	227	227	36.8699
25	7	7.32314	2.75044	1	77	77	69.6769
25	7	5.93142	2.36588	1	261	261	75.0686
25	7	0.952957	1.21878	1	276	276	96.953
25	7	2.64255	1.51241	1	135	135	137.643
25	7	7.03623	1.69089	1	195	195	22.0362
25	7	2.53878	2.06944	1	153	153	150.461
25	7	5.15723	2.10399	1	123	123	128.157
25	7	7.488	1.43927	1	145	145	152.488
25	7	1.50143	2.46926	1	110	110	111.501
25	7	0.447736	2.14361	1	156	156	156.448
25	7	0.137595	1.45931	1	267	267	87.1376
25	7	0.990994	2.53786	1	308	308	128.991
25	7	1.92625	1.29018	1	98	98	99.9262
25	7	0	1.22434	1	90	90	90
25	7	0.952957	1.51406	1	231	231	51.953
25	7	1.38014	1.80503	1	201	201	22.3801
25	7	0.781125	2.37388	1	178	178	178.781
25	7	3.93953	1.95477	1	203	203	26.9395
25	7	2.61046	1.53881	1	244	244	61.3895
25	7	1.46554	1.5784	1	299	299	120.466
25	7	4.39718	2.5071	1	138	138	133.603
25	7	1.86241	2.17826	1	89	89	87.1376
25	7	0.636072	3.0031	1	272	272	91.3639
25	7	0.289153	1.50015	1	266	266	85.7108
25	7	0.260205	2.35883	1	209	209	28.7398
26	7	9.56859	2.27885	1	242	242	52.4314
26	7	15.5731	3.08996	1	184	184	19.5731
26	7	11.6901	2.58459	1	248	248	56.3099
26	7	4.73627	2.18551	1	171	171	166.264
26	7	19.0255	2.58595	1	184	184	23.0255
26	7	7.19859	1.8993	1	74	74	66.8014
26	7	13.1497	2.0622	1	284	284	117.15
26	7	7.61986	2.2686	1	300	300	112.38
26	7	2.95755	1.639	1	127	127	129.958
26	7	11.706	2.24488	1	107	107	118.706
26	7	6.63354	1.47078	1	325	325	138.366
26	7	7.40536	2.22558	1	120	120	127.405
26	7	5.26789	1.38682	1	136	136	130.732
26	7	4.62087	2.11169	1	325	325	149.621
26	7	6.29136	2.91926	1	67	67	60.7086
26	7	16	3.61068	1	209	209	45
26	7	28.9946	3.2637	1	151	151	122.005
26	7	5.99462	1.04621	1	83	83	77.0054
26	7	4.27444	1.34429	1	245	245	69.2744
26	7	2.90716	1.85242	1	310	310	127.093
26	7	11.2249	1.22206	1	99	99	110.225
26	7	8.16235	2.0721	1	134	134	125.838
26	7	1.78991	2.49078	1	135	135	133.21
26	7	5.83765	1.39323	1	300	300	125.838
26	7	13.3045	1.88623	1	203	203	36.3045
26	7	43.2176	1.7018	1	278	278	54.7824
26	7	6.38522	1.60791	1	152	152	158.385
26	7	15.587	0.393751	1	188	188	23.587
26	7	3.51399	2.033	1	224	224	40.486
26	7	30.3048	1.72291	1	245	245	34.6952
27	7	9.35238	1.64922	1	227	227	37.6476
27	7	9.36911	1.11544	1	149	149	158.369
27	7	10.3777	2.69573	1	152	152	162.378
27	7	8.18593	1.83398	1	123	123	131.186
27	7	15.5672	1.5443	1	81	81	65.4328
27	7	22.4926	1.0596	1	111	111	133.493
27	7	1.71312	2.40215	1	189	189	10.7131
27	7	17.6105	2.17904	1	79	79	61.3895
27	7	19.1247	1.61189	1	234	234	34.8753
27	7	10.7295	1.87317	1	121	121	131.73
27	7	11.8699	1.73238	1	65	65	53.1301
27	7	15.4965	1.37239	1	64	64	48.5035
27	7	35.5805	0.212222	1	277	277	132.58
27	7	11.4802	1.35398	1	297	297	128.48
27	7	2.54816	4.05063	1	181	181	178.452
27	7	15.7595	2.86794	1	209	209	13.2405
27	7	11.3664	0.270438	1	337	337	168.366
27	7	2.66269	4.59631	1	5	5	2.33731
27	7	0.559965	0.300135	1	205	205	25.56
27	7	13.3859	1.87944	1	236	236	42.6141
27	7	5.16235	1.46981	1	86	86	80.8377
27	7	3.39871	3.10449	1	181	181	4.39871
27	7	5.90811	0.287557	1	199	199	13.0919
27	7	0.363423	3.99441	1	272	272	91.6366
27	7	16.125	1.34383	1	36	36	52.125
27	7	25.1342	1.48354	1	190	190	35.1342
27	7	18.1145	2.13912	1	106	106	124.114
27	7	5.37062	1.53415	1	151	151	156.371
27	7	22.93	0.080689	1	70	70	47.07
27	7	7.24409	1.34766	1	222	222	34.7559
28	7	4	4.20225	1	221	221	45
28	7	12.0274	2.85916	1	156	156	143.973
28	7	18.9245	4.81741	1	182	182	20.9245
28	7	3.56505	3.37472	1	113	113	116.565
28	7	13.6236	4.76706	1	281	281	114.624
28	7	23.0546	8.24365	1	174	174	150.945
28	7	12.3231	2.57693	1	188	188	20.3231
28	7	10.5651	2.15377	1	74	74	63.4349
28	7	4.68937	6.38615	1	173	173	168.311
28	7	1.56505	2.97062	1	110	110	108.435
28	7	0.782407	4.30277	1	234	234	54.7824
28	7	4.50143	2.58574	1	118	118	113.499
28	7	0.198591	3.62988	1	157	157	156.801
28	7	3.43283	2.16762	1	118	118	114.567
28	7	14.4744	4.82028	1	148	148	162.474
28	7	17.8285	2.12502	1	195	195	32.8285
28	7	6.02737	2.08845	1	120	120	126.027
28	7	2.23483	2.68733	1	235	235	52.7652
28	7	12.2553	1.97396	1	195	195	27.2553
28	7	0.339087	6.77424	1	192	192	12.3391
28	7	2.81138	2.26261	1	216	216	38.8114
28	7	4.99873	1.48491	1	237	237	52.0013
28	7	8.00909	2.05187	1	123	123	131.009
28	7	3.96376	3.4858	1	162	162	165.964
28	7	9.96376	2.07651	1	249	249	59.0362
28	7	8.25644	2.48712	1	158	158	149.744
28	7	2.71059	3.88575	1	222	222	39.2894
28	7	9.84761	1.62848	1	53	53	43.1524
28	7	1.17859	3.73424	1	243	243	61.8214
28	7	8.75098	2.10153	1	76	76	67.249
29	7	7.75948	4.65835	1	294	294	121.759
29	7	11.1063	3.12823	1	163	163	151.894
29	7	4.17901	4.58408	1	165	165	160.821
29	7	22.6013	3.49665	1	108	108	130.601
29	7	11.0454	2.5637	1	144	144	132.955
29	7	11.3803	3.34378	1	67	67	55.6197
29	7	6.82149	2.4916	1	230	230	56.8215
29	7	0.929588	3.32614	1	156	156	156.93
29	7	16.8056	2.7415	1	67	67	50.1944
29	7	9.22486	3.42542	1	259	259	69.7751
29	7	26.8519	4.84294	1	34	34	60.8519
29	7	0.565051	4.20852	1	154	154	153.435
29	7	9.25533	2.36977	1	72	72	62.7447
29	7	0.0273734	5.57788	1	171	171	171.027
29	7	0.171458	6.65813	1	168	168	167.829
29	7	1.52145	3.39235	1	178	178	176.479
29	7	2.10273	5.11725	1	210	210	27.8973
29	7	18.5651	3.58472	1	98	98	116.565
29	7	31.875	5.39331	1	186	186	37.875
29	7	46	10.8301	1	224	224	90
29	7	10.1301	4.1072	1	137	137	126.87
29	7	21.4296	3.74598	1	190	190	31.4296
29	7	5.73627	4.20642	1	172	172	166.264
29	7	2.03624	3.61487	1	237	237	59.0362
29	7	3.97439	3.83683	1	293	293	109.026
29	7	17.9454	3.38986	1	137	137	119.055
29	7	5	1.26652	1	85	85	90
29	7	5.75098	4.23474	1	107	107	112.751
29	7	1.34988	4.97904	1	161	161	162.35
29	7	8.18593	5.26733	1	147	147	138.814
30	7	11	2.47071	1	146	146	135
30	7	1.38954	2.07617	1	300	300	118.61
30	7	7.03086	2.45414	1	205	205	17.9691
30	7	16.6901	2.37268	1	253	253	56.3099
30	7	24.8887	4.14461	1	212	212	56.8887
30	7	18.2461	2.18067	1	36	36	54.2461
30	7	23.6442	2.00537	1	164	164	140.356
30	7	9.41806	2.53824	1	151	151	141.582
30	7	12.8215	3.226	1	226	226	33.1785
30	7	15.0903	2.06374	1	219	219	54.0903
30	7	13.7468	2.09324	1	96	96	109.747
30	7	7.31962	1.72863	1	160	160	167.32
30	7	0.743563	1.75229	1	76	76	75.2564
30	7	9.80141	2.24065	1	258	258	68.1986
30	7	50.9097	1.41415	1	285	285	54.0903
30	7	18.0306	1.29962	1	231	231	32.9694
30	7	17.0548	1.45044	1	246	246	48.9452
30	7	3.30993	2.62847	1	172	172	168.69
30	7	5.09523	2.45411	1	255	255	69.9048
30	7	3.96249	1.64027	1	245	245	68.9625
30	7	88.5345	1.67807	1	151	151	59.5345
30	7	16.9949	2.38461	1	207	207	43.9949
30	7	16.0362	3.02883	1	227	227	30.9638
30	7	7.65929	2.86267	1	319	319	146.659
30	7	4.1155	1.97277	1	88	88	83.8845
30	7	11.3852	1.80128	1	282	282	113.385
30	7	7.30993	1.50628	1	229	229	56.3099
30	7	2.18921	1.25799	1	121	121	118.811
30	7	3.42216	1.74403	1	237	237	60.4222
30	7	14.4692	3.06781	1	158	158	143.531
31	7	16.5154	7.62981	1	111	111	94.4846
31	7	1.0806	4.15071	1	279	279	100.081
31	7	3.68468	3.57493	1	223	223	46.6847
31	7	1.52881	4.43928	1	169	169	167.471
31	7	12.3256	5.73318	1	147	147	159.326
31	7	12.9691	5.05266	1	85	85	72.0309
31	7	2.55297	3.62269	1	177	177	174.447
31	7	0.875328	4.53606	1	79	79	79.8753
31	7	12.9873	3.85574	1	230	230	62.9873
31	7	1.52881	2.89358	1	281	281	102.529
31	7	5.64255	3.45661	1	222	222	47.6425
31	7	4.9487	3.23099	1	118	118	113.051
31	7	8.17474	3.95236	1	321	321	132.825
31	7	5.53918	4.84826	1	85	85	79.4608
31	7	6.40719	4.40234	1	248	248	74.4072
31	7	9.38594	8.45956	1	187	187	177.614
31	7	3.30076	3.60941	1	110	110	106.699
31	7	5.08562	2.98641	1	44	44	49.0856
31	7	9.01279	2.91143	1	51	51	41.9872
31	7	13.5664	4.09433	1	197	197	3.43363
31	7	13.8336	4.77742	1	139	139	125.166
31	7	15.5256	3.37774	1	268	268	72.4744
31	7	5.46232	11.6266	1	94	94	99.4623
31	7	6.30455	3.38406	1	117	117	110.695
31	7	6.61966	3.36862	1	266	266	79.3803
31	7	5.29405	3.93659	1	236	236	61.294
31	7	2.56505	2.75233	1	66	66	63.4349
31	7	4.96376	3.97654	1	199	199	14.0362
31	7	4.33222	2.57717	1	318	318	133.668
31	7	5	4.28974	1	175	175	0
32	7	20.1785	4.42578	1	77	77	56.8215
32	7	15.5085	3.81946	1	289	289	124.509
32	7	9.24146	3.13622	1	82	82	72.7585
32	7	10.8309	2.27196	1	123	123	133.831
32	7	14.9059	4.00255	1	243	243	48.0941
32	7	11.866	3.53949	1	110	110	121.866
32	7	12.8852	3.21538	1	173	173	160.115
32	7	16.5367	3.10047	1	273	273	109.537
32	7	3.09259	6.02365	1	254	254	77.0926
32	7	0.30576	5.03312	1	128	128	127.694
32	7	16.5043	2.81478	1	285	285	121.504
32	7	3.82854	3.63609	1	119	119	122.829
32	7	19.0239	4.04988	1	256	256	56.9761
32	7	11.9321	2.53182	1	79	79	67.0679
32	7	2.89777	2.2116	1	63	63	65.8978
32	7	13.1113	2.40894	1	250	250	56.8887
32	7	10.6209	14.178	1	184	184	14.6209
32	7	8.12502	3.4741	1	226	226	37.875
32	7	20.8377	7.51634	1	165	165	144.162
32	7	21.0274	4.74382	1	165	165	143.973
32	7	1.83365	5.81174	1	249	249	67.1663
32	7	1.07536	7.20096	1	200	200	18.9246
32	7	7.25051	7.25778	1	194	194	21.2505
32	7	17.5571	3.64006	1	46	46	28.4429
32	7	14.2602	4.32568	1	223	223	28.7398
32	7	26.6335	2.86514	1	285	285	131.634
32	7	25.1193	2.41531	1	101	101	126.119
32	7	24.9765	2.75665	1	81	81	56.0235
32	7	0.273689	3.66876	1	42	42	42.2737
32	7	6.0755	2.00728	1	153	153	159.075
33	7	22.0239	5.95153	1	259	259	56.9761
33	7	15.1009	3.23498	1	295	295	130.101
33	7	16.6861	4.0211	1	258	258	61.3139
33	7	15.4296	3.42611	1	74	74	58.5704
33	7	20	3.15174	1	245	245	45
33	7	16.0546	2.31183	1	32	32	15.9454
33	7	3.5722	4.63922	1	88	88	84.4278
33	7	7.29857	2.10064	1	219	219	31.7014
33	7	19.4078	3.87152	1	211	211	11.5922
33	7	2	1.70623	1	92	92	90
33	7	12.4742	4.32139	1	74	74	61.5258
33	7	14.6598	3.92487	1	204	204	38.6598
33	7	8.70995	3.43597	1	73	73	64.29
33	7	6.30621	3.07384	1	254	254	67.6938
33	7	14.125	2.43635	1	52	52	37.875
33	7	4.52411	3.3221	1	169	169	164.476
33	7	10.1572	2.59719	1	118	118	128.157
33	7	1	3.01838	1	89	89	90
33	7	10.4275	2.65261	1	161	161	150.573
33	7	14.4633	2.78983	1	101	101	115.463
33	7	7.11134	3.74674	1	26	26	33.1113
33	7	19.2488	3.07856	1	100	100	119.249
33	7	2.56669	2.2448	1	142	142	144.567
33	7	1.65382	3.65499	1	243	243	64.6538
33	7	39.8746	4.31664	1	161	161	20.8746
33	7	1.58851	4.47984	1	246	246	64.4115
33	7	12.3411	2.23089	1	12	12	24.3411
33	7	11.2902	1.66812	1	117	117	128.29
33	7	3.82141	5.50618	1	167	167	163.179
33	7	6.8789	1.97781	1	126	126	132.879
34	7	31.1376	2.12908	1	259	259	47.8624
34	7	7.35402	2.30478	1	170	170	162.646
34	7	15.5651	1.60788	1	169	169	153.435
34	7	14.4622	1.89701	1	26	26	40.4622
34	7	9.70939	1.54803	1	327	327	137.291
34	7	2.17018	3.24822	1	41	41	38.8298
34	7	19.3558	1.76218	1	239	239	39.6442
34	7	5.02737	3.74639	1	211	211	36.0274
34	7	14.9494	1.9185	1	138	138	152.949
34	7	5.21759	2.61768	1	210	210	35.2176
34	7	9.99202	3.47097	1	205	205	34.992
34	7	3.28915	3.36939	1	224	224	40.7108
34	7	21.0686	1.54993	1	261	261	59.9314
34	7	11.5571	2.44973	1	275	275	106.557
34	7	10.9638	2.2439	1	110	110	120.964
34	7	3.86636	1.60984	1	247	247	70.8664
34	7	7.12213	1.94279	1	131	131	138.122
34	7	8.63354	1.80269	1	327	327	138.366
34	7	7.23067	1.75613	1	258	258	70.7693
34	7	3.86636	1.71633	1	158	158	154.134
34	7	13.6656	2.13596	1	24	24	37.6656
34	7	5.1416	2.56763	1	247	247	61.8584
34	7	7	2.09979	1	218	218	45
34	7	22.6107	1.60682	1	287	287	129.611
34	7	9.08175	1.328	1	148	148	138.918
34	7	20.8551	1.8399	1	65	65	44.1449
34	7	1.01279	2.43764	1	47	47	48.0128
34	7	19.4712	1.77945	1	257	257	57.5288
34	7	10.2996	4.18383	1	163	163	152.7
34	7	31.3893	1.83543	1	289	289	140.389
35	7	7.94519	1.95879	1	41	41	48.9452
35	7	11.8069	3.36332	1	304	304	135.807
35	7	23.875	1.95523	1	76	76	52.125
35	7	3.30993	2.64306	1	188	188	11.3099
35	7	0	3.16126	1	180	180	0
35	7	3.37062	3.10957	1	162	162	158.629
35	7	6.38014	2.50104	1	286	286	112.38
35	7	15.6901	1.95951	1	108	108	123.69
35	7	2.55605	2.57599	1	252	252	69.444
35	7	2.9423	3.39259	1	113	113	115.942
35	7	1.14399	1.86911	1	97	97	95.856
35	7	0.858614	3.55974	1	166	166	165.141
35	7	2.31509	1.99977	1	193	193	10.6849
35	7	4.9194	4.44108	1	195	195	10.0806
35	7	9.20163	2.62284	1	206	206	16.7984
35	7	1.72511	3.1924	1	170	170	168.275
35	7	4.25594	2.56124	1	130	130	134.256
35	7	15.1623	2.17733	1	129	129	144.162
35	7	11.9795	1.52177	1	106	106	117.979
35	7	8.98164	2.71711	1	249	249	60.0184
35	7	5.38954	4.25751	1	146	146	151.39
35	7	5.44719	5.98296	1	168	168	162.553
35	7	0	0.655627	1	90	90	90
35	7	10.627	2.60266	1	138	138	148.627
35	7	17.992	2.74306	1	107	107	124.992
35	7	6.50436	2.2589	1	215	215	28.4956
35	7	2	0.833093	1	88	88	90
35	7	1.79989	1.95877	1	197	197	18.7999
35	7	10.1027	2.72719	1	277	277	107.103
35	7	1.74949	1.79889	1	157	157	158.749
36	7	33.0272	3.08295	1	30	30	63.0272
36	7	7.9849	1.76988	1	167	167	159.015
36	7	4.39237	2.40632	1	157	157	152.608
36	7	2.02507	2.32816	1	131	131	133.025
36	7	1.77608	1.26308	1	124	124	125.776
36	7	6.01689	1.36519	1	109	109	115.017
36	7	3.2942	2.54695	1	176	176	172.706
36	7	12.5377	1.53389	1	168	168	155.462
36	7	7.09189	1.84546	1	276	276	103.092
36	7	33.308	2.24738	1	24	24	57.308
36	7	2.49148	2.5616	1	323	323	145.491
36	7	3.0245	3.60967	1	155	155	151.975
36	7	7.42957	1.11192	1	66	66	58.5704
36	7	14.0679	1.44644	1	143	143	157.068
36	7	2.98106	3.60827	1	176	176	173.019
36	7	25.4965	2.25755	1	106	106	131.496
36	7	6.65256	2.19993	1	174	174	167.347
36	7	2.21888	1.8247	1	136	136	133.781
36	7	18.8157	2.70629	1	168	168	149.184
36	7	1.74616	2.24952	1	173	173	171.254
36	7	20	1.68389	1	205	205	45
36	7	2.46335	1.41852	1	203	203	25.4633
36	7	1.00538	1.09608	1	256	256	77.0054
36	7	2.81388	1.30714	1	172	172	169.186
36	7	4.88517	1.82625	1	255	255	70.1148
36	7	0.746837	1.03208	1	19	19	19.7468
36	7	9.69424	2.44569	1	73	73	82.6942
36	7	5.01128	2.80748	1	208	208	22.9887
36	7	3.8767	1.44451	1	130	130	133.877
36	7	2.46001	1.49395	1	194	194	16.46
37	7	20.0193	4.19769	1	166	166	145.981
37	7	15.0184	1.63422	1	255	255	59.9816
37	7	7.09582	2.15994	1	62	62	54.9042
37	7	12.1593	1.84811	1	199	199	31.1593
37	7	14.8214	1.54585	1	88	88	73.1786
37	7	20.5651	1.97412	1	174	174	153.435
37	7	7.1416	1.31827	1	159	159	151.858
37	7	9.43283	1.68184	1	169	169	159.567
37	7	7.27444	1.32858	1	253	253	65.7256
37	7	14.3008	1.50449	1	166	166	151.699
37	7	24.8141	2.76767	1	204	204	48.8141
37	7	7	2.66003	1	173	173	0
37	7	7.00335	2.77034	1	161	161	153.997
37	7	23.4089	2.03111	1	200	200	43.4089
37	7	3.24052	1.88077	1	260	260	76.7595
37	7	9.61966	2.23081	1	1	1	10.6197
37	7	4.82526	2.15649	1	232	232	47.1747
37	7	1.40772	2.08453	1	204	204	25.4077
37	7	2.34019	2.1713	1	274	274	96.3402
37	7	18.4195	1.77962	1	151	151	132.58
37	7	11.9726	2.11628	1	138	138	126.027
37	7	14.0834	3.05603	1	176	176	161.917
37	7	7.69605	2.1856	1	315	315	127.304
37	7	20.8056	1.70655	1	199	199	39.8056
37	7	5.69007	2.29763	1	28	28	33.6901
37	7	2.65929	1.82851	1	126	126	123.341
37	7	1.62356	1.83791	1	293	293	114.624
37	7	67	1.21974	1	203	203	90
37	7	8.89079	1.40556	1	293	293	121.891
37	7	2.63095	1.90627	1	149	149	151.631
38	7	39.2161	1.3552	1	168	168	27.2161
38	7	8.2026	1.11552	1	174	174	2.2026
38	7	3.46823	1.00639	1	135	135	138.468
38	7	1	0.720302	1	134	134	135
38	7	2.60445	0.939652	1	207	207	29.6045
38	7	26.5041	0.727766	1	281	281	127.504
38	7	22.0546	0.839515	1	187	187	29.0546
38	7	2.85861	1.04586	1	258	258	75.1414
38	7	1.55226	1.08727	1	158	158	156.448
38	7	10.2559	0.893817	1	214	214	44.2559
38	7	8.30993	1.18547	1	228	228	56.3099
38	7	1.19349	0.573605	1	90	90	88.8065
38	7	3.27303	0.74345	1	272	272	88.727
38	7	2.09349	0.891482	1	332	332	154.093
38	7	6.13364	1.34202	1	122	122	115.866
38	7	2	0.589656	1	92	92	90
38	7	11.3758	0.834764	1	224	224	55.3758
38	7	0.890792	0.895925	1	329	329	148.109
38	7	3.70265	1.04391	1	110	110	113.703
38	7	0.00538321	1.25311	1	283	283	102.995
38	7	1.39555	0.943681	1	239	239	60.3955
38	7	8.04594	0.963592	1	154	154	145.954
38	7	13.6992	1.36957	1	267	267	73.3008
38	7	13.5778	1.48478	1	254	254	60.4222
38	7	31.8753	0.819756	1	93	93	124.875
38	7	20.8241	0.941254	1	187	187	27.8241
38	7	7.64101	1.22453	1	63	63	70.641
38	7	13.9967	1.12307	1	230	230	63.9967
38	7	11.4802	0.894829	1	207	207	38.4802
38	7	11.5946	0.896889	1	274	274	82.4054
39	7	4.82449	3.09288	1	240	240	55.1755
39	7	0.0442233	6.19525	1	201	201	20.9558
39	7	9.43141	4.24878	1	137	137	127.569
39	7	8.00909	3.4499	1	57	57	48.9909
39	7	1.40066	2.10813	1	277	277	95.5993
39	7	30.5074	2.37116	1	164	164	133.493
39	7	2.31691	4.33565	1	181	181	178.683
39	7	12.9761	3.74319	1	224	224	56.9761
39	7	24.4623	2.10706	1	330	330	125.538
39	7	13.1811	7.27434	1	194	194	27.1811
39	7	5.37584	2.08476	1	310	310	124.624
39	7	2.2602	2.99547	1	104	104	106.26
39	7	8.02387	4.86432	1	200	200	11.9761
39	7	3.62791	5.29444	1	122	122	125.628
39	7	0.699461	4.27323	1	212	212	32.6995
39	7	4.17859	2.53176	1	204	204	28.1786
39	7	9.96766	3.59553	1	109	109	118.968
39	7	16.3625	5.21636	1	199	199	35.3625
39	7	0.113913	2.50176	1	199	199	18.8861
39	7	4.99665	2.42812	1	301	301	116.003
39	7	13.4915	1.90973	1	138	138	124.509
39	7	6.84439	2.04516	1	161	161	154.156
39	7	11.249	4.54329	1	191	191	22.249
39	7	4.00798	2.48268	1	309	309	124.992
39	7	0.710593	2.11377	1	85	85	84.2894
39	7	5.80697	4.14127	1	243	243	57.193
39	7	1.26477	2.16051	1	56	56	57.2648
39	7	5.0806	2.70471	1	265	265	79.9194
39	7	9.79891	3.45589	1	202	202	31.7989
39	7	13.725	4.00204	1	114	114	127.725

## Sheet: SPMS
Subject_ID	Block_ID	Response_Error (degree)	Reaction_Time (seconds)	Target_Bar	Bar_1_Orientation (degree)	Target_Bar_Orientation (degree)	Subject_Response_Orientation (degree)
1	7	55.4072	8.34374	1	244	244	119.407
1	7	11.3139	5.1029	1	220	220	28.6861
1	7	83	0.809811	1	187	187	90
1	7	6.93638	1.90002	1	147	147	140.064
1	7	24.0362	1.80619	1	55	55	30.9638
1	7	2.25533	1.99949	1	155	155	152.745
1	7	0.945396	2.11273	1	210	210	29.0546
1	7	12.0051	2.08005	1	236	236	43.9949
1	7	10.7144	2.47071	1	102	102	112.714
1	7	16.8285	1.76115	1	74	74	57.1715
1	7	15.0362	4.97315	1	181	181	165.964
1	7	60.8214	4.5539	1	224	224	163.179
1	7	49	0.461921	1	319	319	90
1	7	17.6914	2.21211	1	121	121	138.691
1	7	8.7974	3.78541	1	236	236	47.2026
1	7	12.2933	1.79422	1	132	132	144.293
1	7	10.9048	1.72673	1	76	76	65.0952
1	7	7.3925	2.17058	1	141	141	148.392
1	7	19.4623	0.814824	1	190	190	170.538
1	7	12.9893	2.18065	1	185	185	172.011
1	7	7.48955	2.55723	1	40	40	47.4896
1	7	18.0051	1.78119	1	62	62	43.9949
1	7	10.444	2.286	1	166	166	155.556
1	7	21.9872	1.71712	1	70	70	48.0128
1	7	14.9908	7.14428	1	268	268	73.0092
1	7	7.99202	3.38808	1	63	63	55.008
1	7	2.78991	3.04894	1	179	179	1.78991
1	7	11.7989	2.41068	1	172	172	160.201
1	7	89.1336	2.84026	1	245	245	154.134
1	7	11.6901	2.48584	1	203	203	11.3099
2	7	0.0362435	8.85441	1	284	284	104.036
2	7	24.953	2.99973	1	117	117	141.953
2	7	15.8687	4.25672	1	197	197	32.8687
2	7	5.33022	3.92357	1	331	331	145.67
2	7	11.4181	3.75837	1	117	117	128.418
2	7	5.56505	9.25454	1	159	159	153.435
2	7	17.6156	10.2325	1	234	234	36.3844
2	7	25.7778	3.31371	1	261	261	55.2222
2	7	19.359	7.70864	1	225	225	64.359
2	7	14.4362	3.49966	1	152	152	137.564
2	7	54.8337	8.05455	1	103	103	157.834
2	7	44.6429	8.57662	1	256	256	31.3571
2	7	0	2.63274	1	90	90	90
2	7	13.0375	5.69907	1	188	188	21.0375
2	7	0.743563	11.8373	1	149	149	149.744
2	7	15.4349	4.61083	1	93	93	108.435
2	7	6.6467	11.024	1	126	126	132.647
2	7	34.5288	5.98492	1	247	247	32.4712
2	7	14.5911	5.73764	1	148	148	133.409
2	7	25.5043	5.93751	1	84	84	58.4957
2	7	21.7928	6.24072	1	119	119	140.793
2	7	0.592289	6.03841	1	236	236	55.4077
2	7	4.03624	6.18006	1	280	280	104.036
2	7	5.24903	5.9805	1	151	151	145.751
2	7	32.134	3.08479	1	64	64	31.866
2	7	12.0952	3.6197	1	262	262	69.9048
2	7	2.70995	5.1291	1	158	158	160.71
2	7	13.4089	3.95242	1	240	240	46.5911
2	7	39.6713	5.19268	1	251	251	31.3287
2	7	19.4703	5.30118	1	220	220	59.4703
3	7	20.9421	7.75433	1	255	255	54.0579
3	7	10.992	4.82182	1	156	156	145.008
3	7	5.1301	3.17983	1	132	132	126.87
3	7	10.3987	2.39978	1	141	141	130.601
3	7	2.47688	3.27302	1	149	149	151.477
3	7	2.02549	2.37959	1	159	159	156.975
3	7	6.24883	1.84432	1	157	157	150.751
3	7	19.0594	2.65006	1	164	164	144.941
3	7	11.1414	2.87582	1	109	109	120.141
3	7	20.5312	5.63828	1	67	67	46.4688
3	7	14.5651	2.60417	1	78	78	63.4349
3	7	19.6075	3.98115	1	258	258	58.3925
3	7	2.06849	2.18982	1	193	193	15.0685
3	7	8.82854	3.07462	1	159	159	167.829
3	7	0.926426	3.96524	1	343	343	163.926
3	7	10.1859	2.20967	1	301	301	131.186
3	7	0.037511	1.80651	1	246	246	66.0375
3	7	5.86581	2.83191	1	176	176	170.134
3	7	12.1523	3.54545	1	250	250	57.8477
3	7	8.92751	2.99731	1	172	172	163.072
3	7	17.0362	1.97837	1	85	85	67.9638
3	7	3.22486	1.69056	1	163	163	159.775
3	7	23.3478	1.74534	1	252	252	48.6522
3	7	5.35899	2.94966	1	166	166	160.641
3	7	18.1572	2.96207	1	200	200	38.1572
3	7	3.70939	4.53771	1	231	231	47.2906
3	7	12.0054	3.06521	1	110	110	122.005
3	7	7.3925	2.93131	1	39	39	31.6075
3	7	12.1986	2.92299	1	214	214	21.8014
3	7	12.0903	2.56619	1	132	132	144.09
4	7	10.439	8.86873	1	246	246	55.561
4	7	0.954063	8.94261	1	55	55	55.9541
4	7	21.9182	8.07013	1	117	117	138.918
4	7	12.0546	10.7442	1	287	287	119.055
4	7	4.27489	2.35615	1	119	119	123.275
4	7	15.0169	7.60421	1	80	80	64.9831
4	7	4.96376	2.74106	1	161	161	165.964
4	7	11.3852	2.63308	1	78	78	66.6148
4	7	6.19859	3.71094	1	197	197	23.1986
4	7	19.9638	2.00511	1	101	101	120.964
4	7	2.46223	4.43114	1	322	322	139.538
4	7	3.80141	4.0245	1	162	162	158.199
4	7	5.46771	4.41824	1	36	36	41.4677
4	7	8.01935	4.55157	1	296	296	124.019
4	7	11.5024	2.42334	1	82	82	70.4976
4	7	12.7256	2.97701	1	98	98	110.726
4	7	6.61966	4.1137	1	229	229	55.6197
4	7	34.4076	6.52122	1	277	277	62.5924
4	7	5.84031	4.52413	1	185	185	10.8403
4	7	7.80146	5.57552	1	155	155	162.801
4	7	9.31385	2.97601	1	97	97	106.314
4	7	13.0284	4.60062	1	231	231	37.9716
4	7	10.8265	3.94556	1	176	176	165.174
4	7	6.56717	6.9014	1	162	162	155.433
4	7	0.877393	2.85217	1	185	185	5.87739
4	7	5.30485	4.44603	1	185	185	10.3048
4	7	33.5924	3.67204	1	61	61	27.4076
4	7	13.6901	3.00269	1	290	290	123.69
4	7	7.06047	3.60367	1	11	11	18.0605
4	7	4.61986	3.51675	1	162	162	157.38
5	7	2.55707	7.86872	1	104	104	106.557
5	7	10.6952	4.17859	1	246	246	55.3048
5	7	3.67639	2.07515	1	101	101	104.676
5	7	4.67131	1.97352	1	261	261	76.3287
5	7	2.0546	2.13047	1	243	243	60.9454
5	7	7.65222	5.76967	1	139	139	131.348
5	7	0.0090869	1.80568	1	176	176	176.009
5	7	4.85316	1.67115	1	166	166	161.147
5	7	25.3112	1.51375	1	190	190	35.3112
5	7	8.56859	2.19295	1	209	209	37.5686
5	7	2.14684	1.7975	1	159	159	161.147
5	7	6	2.37062	1	321	321	135
5	7	3.04704	1.95905	1	215	215	38.047
5	7	11.856	1.9352	1	219	219	50.856
5	7	2.87787	3.11104	1	186	186	3.12213
5	7	5.74488	4.5742	1	114	114	119.745
5	7	3.97174	2.26653	1	217	217	40.9717
5	7	2.0772	2.83266	1	58	58	55.9228
5	7	17.1186	2.1022	1	333	333	135.881
5	7	5.69947	1.7852	1	158	158	152.301
5	7	3.00538	1.54563	1	29	29	32.0054
5	7	0.774171	3.33375	1	173	173	173.774
5	7	6.95063	2.74152	1	177	177	170.049
5	7	7.29857	2.61721	1	264	264	76.7014
5	7	7.9025	1.999	1	117	117	124.902
5	7	61.0054	2.58349	1	241	241	122.005
5	7	1.99646	1.46435	1	212	212	33.9965
5	7	4.69947	1.60679	1	293	293	117.699
5	7	9.55967	1.99961	1	165	165	174.56
5	7	21.1186	1.40082	1	157	157	135.881
6	7	8.62356	4.36883	1	119	119	110.376
6	7	5.12401	3.24891	1	100	100	105.124
6	7	23.1376	3.31489	1	199	199	42.1376
6	7	13.139	2.47406	1	162	162	148.861
6	7	20.3499	2.39208	1	142	142	162.35
6	7	14.9044	2.38111	1	177	177	162.096
6	7	1.63251	4.01398	1	40	40	38.3675
6	7	17.2749	2.62718	1	106	106	123.275
6	7	6.09555	2.92457	1	159	159	152.904
6	7	1.07249	0.480074	1	333	333	151.928
6	7	15.56	5.34536	1	190	190	25.56
6	7	4	3.74509	1	229	229	45
6	7	28	0.512735	1	242	242	90
6	7	0.810794	6.73186	1	242	242	61.1892
6	7	17.2564	2.59583	1	193	193	30.2564
6	7	1.53768	4.04089	1	191	191	9.46232
6	7	1.53446	12.3666	1	32	32	30.4655
6	7	9.55605	3.11487	1	259	259	69.444
6	7	10.9228	2.55347	1	135	135	124.077
6	7	7.28688	3.80166	1	207	207	34.2869
6	7	11.125	2.73896	1	131	131	142.125
6	7	16.5318	2.93499	1	115	115	131.532
6	7	10.5308	2.23852	1	223	223	53.5308
6	7	4.95578	2.52429	1	164	164	159.044
6	7	5.25512	2.32771	1	145	145	150.255
6	7	9.10273	2.50344	1	323	323	152.103
6	7	11.6522	1.60246	1	53	53	41.3478
6	7	10	1.91581	1	305	305	135
6	7	6.60129	1.74343	1	214	214	40.6013
6	7	15.5312	2.27496	1	208	208	43.5312
7	7	59.4237	5.46647	1	252	252	131.424
7	7	9	4.80827	1	189	189	0
7	7	21.8202	2.45724	1	110	110	131.82
7	7	2.17135	2.55149	1	164	164	166.171
7	7	12.3402	1.99151	1	231	231	38.6598
7	7	0.121303	3.50828	1	243	243	62.8787
7	7	19.6422	3.07556	1	131	131	150.642
7	7	6.44719	2.36632	1	349	349	162.553
7	7	0.0238676	2.54678	1	192	192	11.9761
7	7	6.47119	3.17468	1	161	161	167.471
7	7	26.9092	2.9432	1	110	110	136.909
7	7	19.6821	2.63521	1	139	139	158.682
7	7	34.7512	3.13669	1	244	244	29.2488
7	7	9.51045	3.13659	1	147	147	137.49
7	7	5.00509	1.91238	1	131	131	136.005
7	7	36.8989	3.35952	1	173	173	29.8989
7	7	3.51399	3.90367	1	136	136	139.514
7	7	2.40988	3.30281	1	153	153	155.41
7	7	11.3005	4.62639	1	219	219	27.6995
7	7	5.49586	2.34731	1	268	268	82.5041
7	7	70	3.43159	1	160	160	90
7	7	4.55138	2.8978	1	162	162	166.551
7	7	9.03624	2.37584	1	40	40	30.9638
7	7	5.2397	1.98461	1	178	178	3.2397
7	7	55	0.561364	1	145	145	90
7	7	4.72697	1.88157	1	141	141	136.273
7	7	16.4259	2.33624	1	131	131	147.426
7	7	8.74488	2.75983	1	159	159	150.255
7	7	7.75097	1.75176	1	42	42	34.249
7	7	5.52411	2.93637	1	190	190	15.5241
8	7	47.3978	19.2004	1	163	163	115.602
8	7	7.83765	3.36864	1	152	152	144.162
8	7	1.45184	2.43739	1	228	228	46.5482
8	7	15.992	2.65084	1	154	154	169.992
8	7	17.5252	2.62914	1	145	145	162.525
8	7	13.3048	2.26271	1	312	312	145.305
8	7	9.23171	2.18093	1	24	24	33.2317
8	7	21.0033	2.86153	1	95	95	116.003
8	7	13.4712	3.60386	1	161	161	147.529
8	7	24.8418	3.09283	1	119	119	143.842
8	7	21.8753	2.23185	1	103	103	124.875
8	7	25.7244	1.58548	1	122	122	147.724
8	7	8.2739	3.28655	1	177	177	5.2739
8	7	31.2415	1.83653	1	59	59	27.7585
8	7	16.0573	2.34637	1	278	278	114.057
8	7	3.20348	1.99038	1	199	199	22.2035
8	7	21.6901	1.88333	1	102	102	123.69
8	7	35.992	1.8338	1	269	269	124.992
8	7	8.64101	1.5756	1	208	208	19.359
8	7	8.67131	2.52031	1	220	220	31.3287
8	7	26.953	1.53998	1	115	115	141.953
8	7	24.5288	2.03996	1	123	123	147.529
8	7	28.0454	1.28144	1	71	71	42.9546
8	7	24.2756	1.36029	1	262	262	57.7244
8	7	10.0151	1.78463	1	149	149	159.015
8	7	19.6769	2.31313	1	85	85	65.3231
8	7	11.6442	1.7042	1	298	298	129.644
8	7	14.125	1.71963	1	52	52	37.875
8	7	1.37584	2.18723	1	216	216	34.6242
8	7	1.86241	4.8161	1	91	91	92.8624
9	7	16.7824	4.60593	1	128	128	144.782
9	7	31.0608	1.71001	1	283	283	134.061
9	7	12.556	3.68523	1	278	278	110.556
9	7	7.70939	1.75593	1	145	145	137.291
9	7	23.1859	1.92397	1	72	72	48.8141
9	7	6.07249	2.5195	1	202	202	28.0725
9	7	21.4518	1.85893	1	248	248	46.5482
9	7	10.5651	1.79321	1	164	164	153.435
9	7	27.646	1.76185	1	180	180	152.354
9	7	3.01279	1.37005	1	135	135	138.013
9	7	6.61924	2.03035	1	116	116	122.619
9	7	7.11134	1.5602	1	206	206	33.1113
9	7	14.1094	1.64033	1	278	278	112.109
9	7	6.21103	1.87815	1	87	87	80.789
9	7	1.90716	2.10479	1	186	186	7.90716
9	7	18.1859	2.95187	1	67	67	48.8141
9	7	3.56505	1.86401	1	157	157	153.435
9	7	11.3675	1.40646	1	243	243	51.6325
9	7	14.5651	1.99148	1	168	168	153.435
9	7	13.992	1.62838	1	291	291	124.992
9	7	37	5.83858	1	127	127	90
9	7	8.98311	1.82468	1	191	191	19.9831
9	7	0.0183606	2.08543	1	210	210	29.9816
9	7	1.14669	1.76413	1	126	126	127.147
9	7	16.8991	1.99266	1	57	57	40.1009
9	7	12.9909	2.69338	1	234	234	41.0091
9	7	14.866	1.44809	1	107	107	121.866
9	7	8.9694	1.48247	1	294	294	122.969
9	7	6.98164	2.05726	1	157	157	150.018
9	7	0.346176	3.71963	1	155	155	154.654
10	7	9	3.52152	1	189	189	0
10	7	2	2.04829	1	133	133	135
10	7	11.5241	2.06639	1	86	86	74.4759
10	7	5.16126	2.27326	1	254	254	68.8387
10	7	0.790514	3.33552	1	176	176	176.791
10	7	15.9097	2.39113	1	70	70	54.0903
10	7	4.09406	4.51607	1	181	181	176.906
10	7	16.8866	2.55109	1	258	258	61.1134
10	7	8.83356	2.62357	1	136	136	144.834
10	7	3.99491	2.06508	1	40	40	43.9949
10	7	18.9065	1.8154	1	263	263	64.0935
10	7	16.2894	2.14869	1	67	67	50.7106
10	7	0.437475	2.55641	1	145	145	145.437
10	7	12.5763	2.51668	1	234	234	41.4237
10	7	11.4349	2.86413	1	187	187	18.4349
10	7	24.4688	2.13426	1	112	112	136.469
10	7	22.5388	1.26208	1	263	263	60.4612
10	7	2.71059	1.72437	1	312	312	129.289
10	7	1.18111	1.71957	1	206	206	27.1811
10	7	1.53077	2.37897	1	218	218	36.4692
10	7	0.818889	2.55591	1	28	28	27.1811
10	7	26.4915	3.58012	1	61	61	34.5085
10	7	38.5829	1.30046	1	106	106	144.583
10	7	4.04662	1.99145	1	165	165	160.953
10	7	20.2161	2.0683	1	277	277	117.216
10	7	8.46223	2.43914	1	122	122	130.462
10	7	34.1211	1.04484	1	257	257	42.8789
10	7	12.7256	2.11111	1	188	188	20.7256
10	7	7.68879	2.5262	1	43	43	35.3112
10	7	6.43748	2.81015	1	139	139	145.437
11	7	75.4474	11.7854	1	243	243	138.447
11	7	18.9625	3.13349	1	185	185	23.9625
11	7	21.0441	2.64055	1	240	240	38.9559
11	7	28.5378	3.08633	1	159	159	130.462
11	7	10.8775	2.43727	1	42	42	31.1225
11	7	5.2764	2.29914	1	37	37	31.7236
11	7	14.3099	2.33398	1	228	228	33.6901
11	7	14.302	3.63781	1	122	122	136.302
11	7	12.1137	2.68359	1	342	342	149.886
11	7	0.424811	2.94627	1	147	147	146.575
11	7	52.2495	3.11826	1	213	213	160.75
11	7	2.87854	3.90588	1	149	149	146.121
11	7	16.6156	11.2969	1	233	233	36.3844
11	7	8.2072	7.72398	1	211	211	39.2072
11	7	28.8214	5.99871	1	237	237	28.1786
11	7	9.89055	6.65139	1	212	212	22.1094
11	7	17.1944	2.75719	1	237	237	39.8056
11	7	18.7098	2.89693	1	57	57	38.2902
11	7	6.07536	3.05227	1	205	205	18.9246
11	7	6.49586	2.31023	1	89	89	82.5041
11	7	19.9726	2.96547	1	56	56	36.0274
11	7	20.3099	4.06602	1	54	54	33.6901
11	7	19.5651	2.52847	1	277	277	116.565
11	7	28.6901	2.22366	1	85	85	56.3099
11	7	6.84277	9.62532	1	180	180	6.84277
11	7	12.0169	5.09859	1	167	167	154.983
11	7	35.0619	2.33341	1	228	228	12.9381
11	7	40.9946	2.71715	1	73	73	32.0054
11	7	34.7546	2.74451	1	261	261	46.2454
11	7	30.4965	2.8686	1	349	349	138.504
12	7	18.9946	8.5492	1	186	186	167.005
12	7	15.4655	2.85278	1	165	165	149.534
12	7	28	0.750787	1	242	242	90
12	7	2.147	8.62837	1	211	211	33.147
12	7	6	2.0643	1	84	84	90
12	7	3.21655	1.79054	1	106	106	102.783
12	7	52	2.77146	1	218	218	90
12	7	23.8699	5.8558	1	283	283	126.87
12	7	0	0.873727	1	270	270	90
12	7	20.0169	8.45247	1	185	185	25.0169
12	7	11.6894	4.84531	1	180	180	11.6894
12	7	50.9047	4.72011	1	307	307	177.905
12	7	3	0.3552	1	267	267	90
12	7	3	0.948014	1	273	273	90
12	7	5.35402	4.41567	1	168	168	162.646
12	7	3.96376	7.39668	1	342	342	165.964
12	7	17.8879	3.07361	1	121	121	138.888
12	7	29.4349	4.4043	1	124	124	153.435
12	7	56.7251	6.6377	1	270	270	146.725
12	7	6.99202	2.77887	1	152	152	145.008
12	7	26.556	9.91543	1	129	129	155.556
12	7	68	0.954245	1	158	158	90
12	7	21.5651	8.3385	1	220	220	18.4349
12	7	51.4518	3.21378	1	172	172	43.4518
12	7	32.3099	3.45098	1	114	114	146.31
12	7	15.9606	9.18098	1	39	39	23.0394
12	7	16.9296	8.36536	1	140	140	156.93
12	7	7.04247	2.88962	1	150	150	142.958
12	7	17.0343	4.00843	1	316	316	153.034
12	7	19	2.32938	1	251	251	90
13	7	4.53665	8.08098	1	240	240	64.5367
13	7	7.50143	7.88722	1	59	59	66.5014
13	7	20.556	4.86193	1	90	90	69.444
13	7	6.39744	11.3482	1	171	171	177.397
13	7	10.5346	4.78357	1	89	89	78.4654
13	7	3.12502	11.7924	1	176	176	172.875
13	7	26.6598	7.62871	1	33	33	6.34019
13	7	13.0169	7.55806	1	327	327	160.017
13	7	15.9044	5.77422	1	223	223	27.0956
13	7	2.44395	7.2981	1	203	203	20.556
13	7	0.804062	10.4692	1	184	184	3.19594
13	7	10.444	7.59137	1	194	194	24.444
13	7	22.8355	12.8198	1	300	300	142.836
13	7	16.5651	5.51287	1	260	260	63.4349
13	7	18.2564	6.60821	1	282	282	120.256
13	7	12.4349	7.08902	1	141	141	153.435
13	7	22.6507	5.11155	1	262	262	59.3493
13	7	1.76255	10.4063	1	165	165	163.237
13	7	15.134	5.6638	1	227	227	31.866
13	7	5.65989	7.37342	1	319	319	144.66
13	7	32.0908	6.54942	1	259	259	46.9092
13	7	1.52467	7.75318	1	323	323	144.525
13	7	7.44719	5.27312	1	55	55	62.4472
13	7	4.47589	9.81973	1	160	160	164.476
13	7	25.6901	9.59262	1	262	262	56.3099
13	7	7.39871	21.4533	1	177	177	4.39871
13	7	29.0023	11.8306	1	152	152	122.998
13	7	3.56859	7.45567	1	191	191	7.43141
13	7	21.6241	43.8414	1	149	149	170.624
13	7	8.25051	5.86162	1	77	77	68.7495
14	7	2.56252	2.1962	1	257	257	79.5625
14	7	7.65981	1.44849	1	301	301	128.66
14	7	23.2157	2.10669	1	191	191	34.2157
14	7	2.63546	1.72198	1	137	137	139.635
14	7	8.30076	1.74125	1	200	200	28.3008
14	7	1.96376	2.77297	1	151	151	149.036
14	7	12.2826	1.91425	1	172	172	159.717
14	7	0.798876	3.50528	1	64	64	64.7989
14	7	17.3625	1.88051	1	198	198	35.3625
14	7	4.63658	2.8392	1	138	138	133.363
14	7	2.35556	2.53682	1	201	201	23.3556
14	7	11.8477	2.00047	1	314	314	122.152
14	7	5.04594	2.48162	1	151	151	145.954
14	7	3.49148	2.20846	1	173	173	169.509
14	7	0.437475	2.35356	1	190	190	10.4375
14	7	10.5238	1.66559	1	222	222	52.5238
14	7	0.422161	2.13575	1	150	150	150.422
14	7	0.00354085	3.97625	1	259	259	78.9965
14	7	12.9949	2.6803	1	149	149	136.005
14	7	5.38954	1.52692	1	304	304	118.61
14	7	9.57633	1.79828	1	219	219	48.5763
14	7	12.2749	1.47116	1	111	111	123.275
14	7	1.80141	1.73	1	110	110	111.801
14	7	5.65012	1.94613	1	168	168	162.35
14	7	7.85446	1.50954	1	193	193	20.8545
14	7	19.2026	1.781	1	152	152	132.797
14	7	3.80141	1.37362	1	117	117	113.199
14	7	7.30485	1.88581	1	3	3	10.3048
14	7	2	2.04448	1	182	182	0
14	7	6.17352	2.46688	1	201	201	14.8265
15	7	23.5923	3.62348	1	131	131	154.592
15	7	8.4321	2.85997	1	83	83	91.4321
15	7	2.25644	2.33755	1	62	62	59.7436
15	7	17.1944	2.8458	1	213	213	50.1944
15	7	33.6526	2.78373	1	24	24	57.6526
15	7	16.0973	2.20044	1	165	165	148.903
15	7	62.2749	2.14557	1	61	61	123.275
15	7	10.7223	1.86138	1	126	126	115.278
15	7	18.4896	3.53973	1	151	151	132.51
15	7	14.6585	2.82338	1	211	211	45.6585
15	7	37.6903	2.45263	1	188	188	45.6903
15	7	23.8861	2.42305	1	265	265	108.886
15	7	13.6901	2.25663	1	200	200	33.6901
15	7	7.12247	1.57462	1	114	114	121.122
15	7	4.10758	2.15129	1	146	146	141.892
15	7	18.7449	2.6559	1	101	101	119.745
15	7	10.4321	2.10166	1	216	216	46.4321
15	7	18.9225	2.06457	1	157	157	138.077
15	7	18.8387	1.80684	1	95	95	113.839
15	7	3.78241	3.37973	1	219	219	35.2176
15	7	1.36342	2.29251	1	222	222	43.3634
15	7	11.2176	2.13503	1	146	146	157.218
15	7	24.0184	1.83076	1	81	81	105.018
15	7	8.77225	2.52854	1	237	237	65.7723
15	7	25.3257	1.66431	1	253	253	98.3257
15	7	23.1986	2.20636	1	45	45	68.1986
15	7	0.801409	2.33636	1	336	336	156.801
15	7	18.0255	2.3674	1	85	85	66.9745
15	7	4.03571	3.15584	1	176	176	171.964
15	7	5.92518	2.95603	1	184	184	178.075
16	7	25.8698	3.8215	1	280	280	125.87
16	7	13.7106	4.36267	1	127	127	140.711
16	7	6.0546	7.6229	1	158	158	164.055
16	7	3.40758	5.55242	1	339	339	162.408
16	7	3.57633	5.55245	1	180	180	176.424
16	7	6.38435	21.5365	1	150	150	143.616
16	7	8.1211	10.1157	1	231	231	42.8789
16	7	12.1755	4.93843	1	272	272	79.8245
16	7	7.57633	5.78231	1	184	184	176.424
16	7	17.3998	13.8065	1	176	176	158.6
16	7	5.84181	4.91151	1	228	228	53.8418
16	7	6.14669	5.98265	1	59	59	52.8533
16	7	10.0395	8.71926	1	136	136	125.961
16	7	3.46122	3.58616	1	123	123	119.539
16	7	1.38594	4.09481	1	136	136	137.386
16	7	40.9949	10.922	1	267	267	46.0051
16	7	17.0169	5.63713	1	278	278	115.017
16	7	19.866	4.1385	1	102	102	121.866
16	7	11.2397	5.97452	1	307	307	138.24
16	7	1.18111	5.20708	1	71	71	72.1811
16	7	25.8141	9.33599	1	157	157	131.186
16	7	11.5198	4.13567	1	40	40	51.5198
16	7	0.507436	4.92706	1	134	134	133.493
16	7	2.46232	6.39444	1	173	173	170.538
16	7	5.42586	11.8712	1	343	343	157.574
16	7	23.0565	3.24922	1	194	194	37.0565
16	7	33.439	4.03518	1	89	89	55.561
16	7	3.96249	2.8093	1	250	250	66.0375
16	7	30	5.00586	1	165	165	135
16	7	15.0679	2.96691	1	83	83	67.9321
17	7	23.0906	6.93002	1	201	201	44.0906
17	7	33.5448	5.76964	1	194	194	47.5448
17	7	18.4111	3.06969	1	258	258	59.5889
17	7	13.8403	2.72829	1	132	132	145.84
17	7	2.9321	2.99205	1	155	155	157.932
17	7	22.5923	1.55655	1	258	258	55.4077
17	7	2.57633	2.14112	1	179	179	176.424
17	7	16.8202	2.57697	1	245	245	48.1798
17	7	1.82017	2.73761	1	230	230	48.1798
17	7	1.38014	2.59713	1	156	156	157.38
17	7	10.125	0.337771	1	132	132	142.125
17	7	3.7357	0.418345	1	227	227	43.2643
17	7	11.8336	3.14068	1	227	227	35.1664
17	7	23.2602	4.16069	1	308	308	151.26
17	7	1.63658	3.20091	1	90	90	91.6366
17	7	2.43141	2.72995	1	185	185	7.43141
17	7	28.4349	2.3857	1	305	305	153.435
17	7	0.673174	2.0823	1	37	37	36.3268
17	7	11.359	2.37702	1	143	143	154.359
17	7	2.99665	2.43358	1	331	331	153.997
17	7	1	0.98364	1	89	89	90
17	7	1.43495	1.88883	1	163	163	161.565
17	7	25.2176	2.56749	1	100	100	125.218
17	7	8.2397	3.73168	1	40	40	48.2397
17	7	7.61565	4.87472	1	91	91	98.6156
17	7	3.71441	3.29405	1	199	199	22.7144
17	7	11.556	2.08902	1	216	216	24.444
17	7	3.06081	3.75147	1	229	229	45.9392
17	7	14.5206	3.95146	1	262	262	67.4794
17	7	19.4692	3.18388	1	253	253	53.5308
18	7	13.9392	1.6582	1	122	122	135.939
18	7	17.8664	1.43608	1	278	278	115.866
18	7	4.02737	0.950207	1	122	122	126.027
18	7	14	1.31422	1	166	166	0
18	7	18.1221	1.31336	1	120	120	138.122
18	7	9.32453	3.47267	1	274	274	103.325
18	7	18.9949	2.47497	1	205	205	43.9949
18	7	4.00538	1.45379	1	208	208	32.0054
18	7	3.46335	1.03563	1	157	157	160.463
18	7	7.16235	1.07315	1	137	137	144.162
18	7	7.31791	1.0679	1	166	166	158.682
18	7	11.1986	1.45039	1	168	168	156.801
18	7	20.444	1.09242	1	221	221	20.556
18	7	7.65981	1.50337	1	211	211	38.6598
18	7	1.13402	1.27846	1	147	147	148.134
18	7	4.48955	1.25677	1	182	182	177.51
18	7	19.8285	2.19106	1	193	193	32.8285
18	7	7.01689	1.2077	1	162	162	154.983
18	7	11.179	1.58076	1	217	217	25.821
18	7	7.27369	2.22928	1	55	55	47.7263
18	7	24.6859	1.35902	1	115	115	139.686
18	7	13.7449	1.22707	1	286	286	119.745
18	7	2.56505	1.35628	1	156	156	153.435
18	7	2.6467	1.23673	1	220	220	42.6467
18	7	9.04094	1.52257	1	182	182	11.0409
18	7	9.78264	1.01782	1	322	322	151.783
18	7	16.0355	1.22287	1	67	67	50.9645
18	7	2.74467	1.62465	1	240	240	62.7447
18	7	18.5104	2.05853	1	204	204	42.5104
18	7	21.0948	1.33658	1	306	306	147.095
19	7	14.9625	2.92297	1	261	261	66.0375
19	7	13.5297	1.71809	1	107	107	120.53
19	7	28.0643	1.94542	1	194	194	42.0643
19	7	6.96249	1.66131	1	253	253	66.0375
19	7	0	1.1883	1	90	90	90
19	7	1.63658	2.37338	1	225	225	46.6366
19	7	7.80141	1.74541	1	284	284	111.801
19	7	12.8014	2.00546	1	171	171	158.199
19	7	3.83365	1.87051	1	251	251	67.1663
19	7	13.8973	1.74515	1	194	194	27.8973
19	7	5.46232	1.54082	1	176	176	170.538
19	7	3.76517	2.80908	1	266	266	82.2348
19	7	13.4915	1.27825	1	138	138	124.509
19	7	6.81889	1.4725	1	124	124	117.181
19	7	27.9042	1.4431	1	207	207	54.9042
19	7	5.36905	1.3366	1	157	157	151.631
19	7	6.59228	1.48869	1	302	302	115.408
19	7	10.6598	1.63114	1	152	152	141.34
19	7	1.95591	1.40486	1	217	217	38.9559
19	7	0.0362435	1.46207	1	166	166	165.964
19	7	4.75854	1.74026	1	247	247	62.2415
19	7	6.04094	1.51649	1	95	95	101.041
19	7	2.24611	2.03543	1	263	263	80.7539
19	7	24.6013	1.36174	1	164	164	139.399
19	7	31.1221	1.36187	1	17	17	48.1221
19	7	3.04541	2.33401	1	179	179	2.04541
19	7	9.95755	1.85351	1	195	195	5.04245
19	7	63.7693	3.32781	1	187	187	70.7693
19	7	5.92625	1.36831	1	86	86	80.0738
19	7	5.3925	1.45253	1	262	262	76.6075
20	7	0.381395	3.14912	1	166	166	165.619
20	7	4.99091	2.70137	1	179	179	3.99091
20	7	13.2348	3.39989	1	204	204	37.2348
20	7	0.842389	2.66484	1	156	156	155.158
20	7	6.69007	1.70343	1	117	117	123.69
20	7	7.23067	2.0541	1	258	258	70.7693
20	7	11.3895	2.50422	1	85	85	73.6105
20	7	12.4612	3.01553	1	183	183	15.4612
20	7	0.601295	2.30071	1	85	85	85.6013
20	7	1.13402	4.03975	1	168	168	166.866
20	7	3.0546	3.18922	1	109	109	105.945
20	7	10.3099	3.21825	1	181	181	11.3099
20	7	11.393	2.35931	1	17	17	28.393
20	7	8.43495	2.31985	1	55	55	63.4349
20	7	25.6901	1.68317	1	82	82	56.3099
20	7	17.778	5.202	1	89	89	71.222
20	7	1.00798	1.5549	1	54	54	55.008
20	7	17.4328	2.75523	1	132	132	114.567
20	7	8.96249	5.45918	1	105	105	113.962
20	7	9.4802	3.40158	1	106	106	96.5198
20	7	6.69605	3.04251	1	134	134	127.304
20	7	10.0205	3.12423	1	128	128	117.979
20	7	4.88609	2.17547	1	256	256	71.1139
20	7	10.2249	1.65626	1	55	55	65.2249
20	7	10.0184	3.64597	1	185	185	15.0184
20	7	4.82854	2.46387	1	242	242	57.1715
20	7	17.5523	2.59056	1	264	264	66.4477
20	7	9.00909	2.94719	1	212	212	41.0091
20	7	0.914383	4.05503	1	175	175	175.914
20	7	3.22775	2.76869	1	249	249	65.7723
21	7	15.2637	2.85096	1	164	164	148.736
21	7	7.98689	2.5924	1	238	238	50.0131
21	7	13.5482	3.81251	1	57	57	43.4518
21	7	0.592175	2.57849	1	146	146	146.592
21	7	14.0731	3.72328	1	157	157	142.927
21	7	4.18471	2.30258	1	213	213	37.1847
21	7	37.5523	4.2495	1	59	59	21.4477
21	7	22.6192	3.27569	1	260	260	57.3808
21	7	13.2777	2.99806	1	192	192	25.2777
21	7	6.23639	4.15092	1	178	178	4.23639
21	7	0.0490048	10.423	1	151	151	151.049
21	7	31.7441	3.83255	1	104	104	135.744
21	7	1.80557	3.85369	1	38	38	39.8056
21	7	3.14554	2.35949	1	159	159	155.854
21	7	19.1941	2.26391	1	223	223	23.8059
21	7	13.9797	4.04605	1	165	165	151.02
21	7	76.3106	7.18415	1	43	43	146.689
21	7	16.6538	2.20832	1	222	222	25.3462
21	7	5.00909	2.82568	1	234	234	48.9909
21	7	59.0856	4.33931	1	260	260	139.086
21	7	26.1737	2.58308	1	283	283	129.174
21	7	26.8418	3.17582	1	117	117	143.842
21	7	23.1847	1.7763	1	104	104	127.185
21	7	0.178512	4.1759	1	147	147	146.821
21	7	5.69545	4.23361	1	255	255	69.3045
21	7	16.4181	2.62338	1	292	292	128.418
21	7	80.1342	7.06465	1	45	45	125.134
21	7	8.93142	10.9587	1	174	174	165.069
21	7	7.80557	2.83057	1	167	167	174.806
21	7	6.96377	4.04017	1	16	16	22.9638
22	7	29.9638	4.27193	1	269	269	59.0362
22	7	12.9065	2.63767	1	212	212	19.0935
22	7	6.3045	1.79528	1	240	240	53.6955
22	7	6.40988	1.88028	1	166	166	159.59
22	7	4.60129	2.13957	1	54	54	49.3987
22	7	3.69379	1.91497	1	251	251	67.3062
22	7	11.8056	1.41818	1	118	118	129.806
22	7	6.40536	2.72785	1	194	194	7.59464
22	7	8.0546	4.03145	1	24	24	15.9454
22	7	12.4007	2.76908	1	198	198	5.59934
22	7	14.3807	1.63315	1	108	108	122.381
22	7	8.90651	2.9271	1	208	208	19.0935
22	7	0.508523	1.8342	1	146	146	145.491
22	7	14.5104	2.66405	1	208	208	42.5104
22	7	5.6075	2.79052	1	64	64	58.3925
22	7	0.885527	1.77941	1	10	10	10.8855
22	7	9.82982	1.81205	1	119	119	128.83
22	7	1.34019	2.88917	1	185	185	6.34019
22	7	1.53768	2.10813	1	236	236	54.4623
22	7	3.06362	1.83521	1	223	223	39.9364
22	7	20.0725	2.25672	1	98	98	118.072
22	7	0.0168935	3.13551	1	155	155	154.983
22	7	19.0205	3.18323	1	88	88	107.021
22	7	8.96376	2.17557	1	112	112	120.964
22	7	9.19321	3.62412	1	117	117	126.193
22	7	3.47443	1.8579	1	204	204	27.4744
22	7	0.523161	1.88798	1	148	148	148.523
22	7	10.2538	3.39083	1	161	161	171.254
22	7	13.782	2.66759	1	260	260	66.218
22	7	4.01279	1.85384	1	226	226	41.9872
23	7	38.5467	10.4797	1	162	162	123.453
23	7	17.3665	4.19361	1	329	329	131.634
23	7	14.1455	18.1709	1	280	280	114.146
23	7	82.2612	10.1104	1	161	161	78.7388
23	7	12.6468	4.9811	1	149	149	136.353
23	7	25.7251	4.67783	1	346	346	11.7251
23	7	5.0546	11.5444	1	111	111	105.945
23	7	0.258846	4.13237	1	131	131	130.741
23	7	3.20522	5.72368	1	135	135	138.205
23	7	0.469174	7.39076	1	190	190	10.4692
23	7	10.06	5.60342	1	276	276	106.06
23	7	11.9709	3.78061	1	118	118	129.971
23	7	6.50703	4.79739	1	129	129	135.507
23	7	1.074	5.36989	1	76	76	77.074
23	7	16.6901	3.97382	1	253	253	56.3099
23	7	8.14968	3.15826	1	71	71	62.8503
23	7	9.80679	4.99845	1	136	136	126.193
23	7	6.94391	4.56737	1	63	63	69.9439
23	7	4.70939	4.4517	1	142	142	137.291
23	7	0.639809	5.38154	1	305	305	125.64
23	7	8.8987	8.49793	1	84	84	75.1013
23	7	11.0546	6.34865	1	243	243	74.0546
23	7	20.0362	7.11245	1	219	219	59.0362
23	7	4.53462	5.58344	1	263	263	78.4654
23	7	26.8637	6.31984	1	223	223	69.8637
23	7	12.3189	3.9312	1	320	320	152.319
23	7	4.58734	4.78689	1	258	258	73.4127
23	7	2.75047	3.17557	1	158	158	160.75
23	7	12	8.08825	1	237	237	45
23	7	3.85521	4.91875	1	106	106	109.855
24	7	15.5829	1.76365	1	129	129	144.583
24	7	5.55226	1.78479	1	288	288	113.552
24	7	24.9421	1.38464	1	101	101	125.942
24	7	0.193489	1.75363	1	179	179	178.807
24	7	18.0054	1.90579	1	104	104	122.005
24	7	11.8532	1.62528	1	83	83	71.1468
24	7	17.2277	1.96261	1	83	83	65.7723
24	7	20.1859	2.59104	1	69	69	48.8141
24	7	21.6732	2.29194	1	238	238	36.3268
24	7	64.9638	3.40675	1	318	318	22.9638
24	7	16.9112	2.48804	1	235	235	38.0888
24	7	6.4802	1.56249	1	212	212	38.4802
24	7	9.83874	1.40669	1	104	104	113.839
24	7	8.14289	2.70383	1	183	183	11.1429
24	7	5.14669	3.35931	1	167	167	172.147
24	7	10.5256	1.15942	1	83	83	72.4744
24	7	5.01836	1.4197	1	145	145	150.018
24	7	6.75117	1.50514	1	216	216	29.2488
24	7	59.1944	2.34405	1	99	99	39.8056
24	7	13.0459	1.59573	1	201	201	34.0459
24	7	3.96249	1.75299	1	200	200	23.9625
24	7	3	0.425108	1	267	267	90
24	7	7.04245	1.69885	1	178	178	5.04245
24	7	11.444	1.26187	1	103	103	114.444
24	7	7.09189	2.52785	1	186	186	13.0919
24	7	17.8882	1.60768	1	299	299	136.888
24	7	13.9072	1.50482	1	141	141	127.093
24	7	5.11391	1.23172	1	159	159	153.886
24	7	5.16235	2.87387	1	176	176	170.838
24	7	17.2488	1.83609	1	168	168	150.751
25	7	5.30395	5.60001	1	77	77	82.3039
25	7	0.17859	3.08084	1	287	287	106.821
25	7	8.12467	3.17118	1	182	182	10.1247
25	7	0.87787	2.52797	1	139	139	138.122
25	7	13.5911	2.37517	1	237	237	43.4089
25	7	1.69515	4.1283	1	258	258	79.6952
25	7	11.1134	2.93119	1	50	50	61.1134
25	7	8.38076	1.73887	1	41	41	32.6192
25	7	20.5651	1.99067	1	96	96	116.565
25	7	12.6375	3.73915	1	138	138	125.362
25	7	0.260205	2.33518	1	61	61	61.2602
25	7	21.6678	2.96657	1	158	158	136.332
25	7	9.52881	2.27492	1	132	132	122.471
25	7	3.38931	2.33348	1	133	133	129.611
25	7	9.69139	2.59751	1	129	129	138.691
25	7	1.20047	2.16612	1	281	281	102.2
25	7	7.42077	2.39441	1	97	97	104.421
25	7	86	0.55923	1	184	184	90
25	7	14.7636	2.76055	1	145	145	130.236
25	7	11.1027	1.79209	1	96	96	107.103
25	7	2.0679	2.16507	1	250	250	67.9321
25	7	5.30576	3.20952	1	317	317	142.306
25	7	2.42077	3.4503	1	192	192	14.4208
25	7	8.9245	2.05264	1	258	258	69.0755
25	7	8.03026	2.99858	1	238	238	49.9697
25	7	8.82634	2.15142	1	48	48	39.1737
25	7	16.9872	2.44784	1	155	155	138.013
25	7	5.42367	4.26603	1	9	9	3.57633
25	7	4.19443	2.12801	1	224	224	39.8056
25	7	14.5651	1.80782	1	78	78	63.4349
26	7	1.00798	3.08752	1	216	216	34.992
26	7	13.8337	2.01847	1	189	189	22.8337
26	7	10.1623	2.53579	1	226	226	35.8377
26	7	3.31385	2.67916	1	193	193	16.3139
26	7	23.1233	2.60621	1	293	293	136.123
26	7	17.6325	2.0348	1	124	124	141.633
26	7	23.8263	2.88087	1	297	297	140.826
26	7	15.5571	2.12752	1	89	89	73.4429
26	7	10.1986	2.48698	1	238	238	68.1986
26	7	12.7683	1.81032	1	134	134	146.768
26	7	11.5686	2.72719	1	206	206	37.5686
26	7	12.2011	3.87055	1	167	167	154.799
26	7	0.290046	1.72119	1	71	71	70.71
26	7	39.1755	4.74069	1	196	196	55.1755
26	7	27.0128	2.38447	1	201	201	48.0128
26	7	1	3.80126	1	181	181	0
26	7	8.45058	1.82633	1	119	119	127.451
26	7	11.4349	3.34761	1	142	142	153.435
26	7	29	2.8798	1	164	164	135
26	7	13.0577	3.70618	1	129	129	115.942
26	7	3.9454	2.8094	1	168	168	164.055
26	7	7.66091	1.88241	1	160	160	167.661
26	7	22.2461	2.92905	1	122	122	144.246
26	7	22.3402	2.64099	1	299	299	141.34
26	7	28.4349	2.50282	1	125	125	153.435
26	7	5.1301	2.66951	1	222	222	36.8699
26	7	10.5704	2.75197	1	42	42	31.4296
26	7	2.7398	3.7439	1	161	161	163.74
26	7	8.92751	3.08417	1	172	172	163.072
26	7	10.9454	2.0187	1	265	265	74.0546
27	7	19.3777	4.80271	1	188	188	27.3777
27	7	9.62356	2.21175	1	255	255	65.3764
27	7	11.0239	2.85289	1	248	248	56.9761
27	7	1.05609	2.86289	1	154	154	155.056
27	7	14.9831	3.22465	1	220	220	25.0169
27	7	23.4537	4.5702	1	15	15	38.4537
27	7	4.36932	2.78275	1	145	145	140.631
27	7	4.50143	4.27967	1	73	73	68.4986
27	7	17.8014	3.25777	1	184	184	21.8014
27	7	0.579227	3.96002	1	255	255	75.5792
27	7	6.57392	4.00817	1	223	223	49.5739
27	7	12.2011	2.23692	1	257	257	64.7989
27	7	1.99202	2.14674	1	123	123	124.992
27	7	9.81529	3.67457	1	133	133	142.815
27	7	8.19443	3.21295	1	228	228	39.8056
27	7	11.1737	2.93018	1	298	298	129.174
27	7	7.83765	2.28208	1	62	62	54.1623
27	7	3.98311	3.2486	1	164	164	160.017
27	7	6.49586	4.86638	1	269	269	82.5041
27	7	2.00798	3.31268	1	262	262	79.992
27	7	10.4287	2.86403	1	167	167	156.571
27	7	0.983107	3.8703	1	199	199	19.9831
27	7	1.34618	5.36877	1	201	201	19.6538
27	7	14.8056	5.64505	1	245	245	50.1944
27	7	12.359	3.49507	1	173	173	160.641
27	7	19	4.70589	1	244	244	45
27	7	62.9761	11.6091	1	174	174	56.9761
27	7	17.5377	3.41355	1	162	162	144.462
27	7	1.22486	7.58663	1	206	206	24.7751
27	7	4.55605	4.34347	1	164	164	159.444
28	7	36.6938	14.0908	1	211	211	67.6938
28	7	28	8.85673	1	298	298	90
28	7	29.3929	5.25154	1	204	204	53.3929
28	7	17.1022	3.83324	1	187	187	24.1022
28	7	24.8699	2.8907	1	258	258	53.1301
28	7	4.09476	4.32515	1	188	188	12.0948
28	7	34.6235	4.96436	1	121	121	155.624
28	7	27.185	3.34051	1	274	274	121.185
28	7	2.30485	7.36029	1	53	53	55.3048
28	7	17.5074	5.64032	1	209	209	46.5074
28	7	17.6942	5.5339	1	200	200	37.6942
28	7	5.39302	4.3495	1	203	203	28.393
28	7	1.65891	4.3612	1	116	116	114.341
28	7	6.18584	5.52179	1	189	189	15.1858
28	7	8.09157	5.52468	1	173	173	164.908
28	7	4.40719	4.8	1	200	200	15.5928
28	7	11.4744	5.14515	1	151	151	162.474
28	7	1	1.94062	1	269	269	90
28	7	9.1186	3.65672	1	215	215	44.1186
28	7	17.8245	4.28718	1	197	197	34.8245
28	7	1.09951	6.55773	1	130	130	131.1
28	7	7.47679	5.26216	1	104	104	111.477
28	7	8.31791	3.86002	1	103	103	111.318
28	7	12.3893	8.43411	1	173	173	5.38931
28	7	10.2415	3.27146	1	97	97	107.241
28	7	0.201124	4.48186	1	290	290	109.799
28	7	0.556045	5.04894	1	200	200	20.556
28	7	1.81889	3.8505	1	164	164	162.181
28	7	18.3803	5.74866	1	196	196	34.3803
28	7	15.9395	5.2163	1	214	214	18.0605
29	7	23.6901	3.88182	1	80	80	56.3099
29	7	16.9921	2.58303	1	191	191	27.9921
29	7	21.7436	2.39277	1	128	128	149.744
29	7	20.5345	3.25773	1	186	186	165.466
29	7	1.47688	3.51984	1	165	165	163.523
29	7	24.1524	2.57943	1	109	109	133.152
29	7	21.7543	3.65974	1	249	249	47.2457
29	7	21.8059	2.92205	1	272	272	113.806
29	7	26.789	2.56538	1	81	81	54.211
29	7	11.4362	2.27379	1	121	121	132.436
29	7	4.60256	1.31608	1	92	92	87.3974
29	7	0.0678996	3.50413	1	157	157	157.068
29	7	7.01876	5.55878	1	212	212	24.9812
29	7	7.9454	3.89506	1	143	143	150.945
29	7	1.16926	4.68999	1	179	179	177.831
29	7	28.9338	2.68867	1	198	198	169.066
29	7	62	1.19571	1	28	28	90
29	7	29.4965	1.76829	1	282	282	131.496
29	7	6.17529	2.22898	1	155	155	161.175
29	7	15.4769	2.66249	1	136	136	151.477
29	7	15.4287	2.17286	1	172	172	156.571
29	7	13.3563	1.66907	1	301	301	134.356
29	7	15.2686	0.735484	1	334	334	138.731
29	7	18.1301	1.97449	1	305	305	143.13
29	7	47.1859	1.679	1	264	264	131.186
29	7	12.0418	3.74934	1	14	14	26.0418
29	7	16.0937	1.8091	1	230	230	33.9063
29	7	22.1524	1.92636	1	111	111	133.152
29	7	9.60129	2.04149	1	121	121	130.601
29	7	11.1892	2.98335	1	220	220	28.8108
30	7	27.0686	8.91818	1	183	183	30.0686
30	7	5.49586	12.0289	1	178	178	172.504
30	7	4.69139	12.142	1	181	181	176.309
30	7	9.48955	9.1696	1	173	173	2.48955
30	7	3.30993	7.9338	1	37	37	33.6901
30	7	3.80427	6.52521	1	261	261	77.1957
30	7	1.84181	5.39236	1	187	187	8.84181
30	7	3.88553	5.23737	1	187	187	10.8855
30	7	10.614	3.6751	1	162	162	172.614
30	7	2.66779	2.88197	1	179	179	176.332
30	7	7	1.50028	1	83	83	90
30	7	9.77514	2.88391	1	105	105	114.775
30	7	1.55605	4.50997	1	161	161	159.444
30	7	7.87498	3.13318	1	150	150	142.125
30	7	9.35775	7.73254	1	200	200	29.3578
30	7	5.82449	2.86831	1	209	209	34.8245
30	7	25.0459	2.66288	1	99	99	124.046
30	7	9.69947	5.62913	1	198	198	27.6995
30	7	21.4477	6.54252	1	315	315	156.448
30	7	12.7098	7.20267	1	129	129	141.71
30	7	2.99091	5.09124	1	89	89	86.0091
30	7	7.20047	3.30558	1	265	265	77.7995
30	7	2.97493	3.51295	1	181	181	178.025
30	7	10.9522	7.44825	1	106	106	116.952
30	7	1.74681	2.29822	1	234	234	52.2532
30	7	2.64762	2.14094	1	35	35	37.6476
30	7	17.1336	3.32091	1	137	137	154.134
30	7	3.18593	2.86013	1	218	218	41.1859
30	7	4.46232	4.48648	1	175	175	170.538
30	7	9.46335	2.18101	1	254	254	64.5367
31	7	11.0686	5.2088	1	154	154	165.069
31	7	6.11321	5.88946	1	203	203	16.8868
31	7	14.0259	6.52765	1	88	88	73.9741
31	7	5.43141	2.20718	1	227	227	52.4314
31	7	5.3925	2.8245	1	233	233	58.3925
31	7	10.9831	6.15405	1	189	189	19.9831
31	7	2.38954	2.64209	1	76	76	73.6105
31	7	7.88553	4.30392	1	183	183	10.8855
31	7	3.1416	3.81932	1	245	245	61.8584
31	7	4.38034	6.38434	1	195	195	10.6197
31	7	2.65981	2.81693	1	234	234	51.3402
31	7	3.13018	4.40627	1	174	174	170.87
31	7	16.5377	8.39145	1	206	206	9.46232
31	7	9.56859	8.41194	1	62	62	52.4314
31	7	4.24611	4.1131	1	140	140	144.246
31	7	7.19859	2.70415	1	254	254	66.8014
31	7	5.30993	7.36728	1	186	186	11.3099
31	7	2.96376	3.69139	1	197	197	14.0362
31	7	19.953	7.8413	1	58	58	38.047
31	7	0.460015	2.44788	1	209	209	28.54
31	7	3.46554	5.01681	1	162	162	165.466
31	7	17.7636	5.28762	1	302	302	139.764
31	7	6.1301	9.29363	1	178	178	171.87
31	7	0.0678996	3.32054	1	157	157	157.068
31	7	17.9946	5.58772	1	130	130	147.995
31	7	25.7585	6.67266	1	272	272	117.759
31	7	4.48955	8.05084	1	137	137	132.51
31	7	7.38014	7.92485	1	210	210	22.6199
31	7	9.47943	4.73617	1	283	283	112.479
31	7	4.09476	2.37561	1	262	262	77.9052
32	7	49.0856	7.02553	1	225	225	94.0856
32	7	5.99584	3.10975	1	246	246	71.9958
32	7	21.6847	4.57295	1	205	205	46.6847
32	7	74.7965	2.97809	1	187	187	112.203
32	7	0.198591	2.83038	1	337	337	156.801
32	7	2.53768	2.05956	1	102	102	99.4623
32	7	25.5724	6.75416	1	212	212	57.5724
32	7	9.17292	3.48992	1	174	174	164.827
32	7	39.9097	4.64882	1	221	221	80.9097
32	7	7.88679	2.61855	1	279	279	106.887
32	7	6.30802	4.75217	1	174	174	167.692
32	7	16.6075	2.99979	1	105	105	121.608
32	7	6.10376	2.82504	1	282	282	108.104
32	7	13.0546	3.17081	1	74	74	60.9454
32	7	9.02053	2.88677	1	127	127	117.979
32	7	15.7751	2.78968	1	234	234	69.7751
32	7	7.65929	2.87436	1	139	139	146.659
32	7	0.0809242	4.0692	1	181	181	1.08092
32	7	1	6.71203	1	181	181	0
32	7	4.89055	1.79869	1	252	252	67.1094
32	7	8.59531	3.63155	1	103	103	111.595
32	7	0.184706	7.78537	1	98	98	97.8153
32	7	21.3462	3.76976	1	139	139	160.346
32	7	4.94519	3.52613	1	136	136	131.055
32	7	11.9575	2.26545	1	242	242	50.0425
32	7	55.4956	4.89548	1	72	72	16.5044
32	7	19.1849	5.55476	1	120	120	139.185
32	7	8.8989	4.37075	1	339	339	150.101
32	7	6.78991	2.24682	1	310	310	136.79
32	7	10.0935	7.22512	1	99	99	109.093
