# Supplementary material for: A mechanistic insight into sources of error of visual working memory in multiple sclerosis
Source: eLife. 2023 Nov 8;12:RP87442. doi: 10.7554/eLife.87442 (PMC10631758; doi:10.7554/eLife.87442)
Supplement: Table 1—source data 1. [file elife-87442-table1-data1.xlsx]

## Sheet: Demographic and clinical data
Subject_ID	Participants	Gender	Age	Education	MoCA score	Disease Duration	EDSS	Disease-modifying therapy
1	Healthy	M	40	12	28	N/A	N/A	N/A
2	Healthy	M	41	12	27	N/A	N/A	N/A
3	Healthy	M	32	12	30	N/A	N/A	N/A
4	Healthy	F	46	12	29	N/A	N/A	N/A
5	Healthy	F	38	12	30	N/A	N/A	N/A
6	Healthy	M	55	16	27	N/A	N/A	N/A
7	Healthy	F	50	10	28	N/A	N/A	N/A
8	Healthy	M	35	16	30	N/A	N/A	N/A
9	Healthy	F	25	12	30	N/A	N/A	N/A
10	Healthy	M	31	16	30	N/A	N/A	N/A
11	Healthy	F	27	16	30	N/A	N/A	N/A
12	Healthy	F	27	16	29	N/A	N/A	N/A
13	Healthy	F	36	10	28	N/A	N/A	N/A
14	Healthy	F	32	16	30	N/A	N/A	N/A
15	Healthy	M	26	12	30	N/A	N/A	N/A
16	Healthy	M	28	12	30	N/A	N/A	N/A
17	Healthy	M	27	16	30	N/A	N/A	N/A
18	Healthy	M	45	16	30	N/A	N/A	N/A
19	Healthy	F	27	16	30	N/A	N/A	N/A
20	Healthy	F	35	16	30	N/A	N/A	N/A
21	Healthy	F	40	12	26	N/A	N/A	N/A
22	Healthy	F	43	6	30	N/A	N/A	N/A
23	Healthy	F	40	12	28	N/A	N/A	N/A
1	RRMS	F	38	12	25	10	1.5	Rituximab
2	RRMS	F	39	16	29	9	1	Interferon beta-1a
3	RRMS	F	43	9	28	8	1	Interferon beta-1a
4	RRMS	F	43	16	30	9	2	Rituximab
5	RRMS	F	44	12	30	15	2	Rituximab
6	RRMS	F	32	12	28	5	2.5	Rituximab
7	RRMS	F	47	16	30	15	1	Rituximab
8	RRMS	F	43	16	30	9	2	Rituximab
9	RRMS	M	25	12	30	5	0	Rituximab
10	RRMS	F	34	16	24	11	1	Rituximab
11	RRMS	F	34	12	28	8	1.5	Rituximab
12	RRMS	F	31	18	30	7	1	Rituximab
13	RRMS	F	46	16	30	5	2	Rituximab
14	RRMS	F	35	6	30	6	0	Rituximab
15	RRMS	M	28	12	30	5	0	Rituximab
16	RRMS	F	34	18	29	10	2	Rituximab
1	SPMS	F	37	16	29	9	1.5	Rituximab
2	SPMS	F	40	9	29	13	2.5	Rituximab
3	SPMS	F	43	14	26	15	2.5	Rituximab
4	SPMS	M	41	10	23	7	5	Rituximab
5	SPMS	M	50	12	27	12	3.5	Rituximab
6	SPMS	F	41	6	27	7	3	Rituximab
7	SPMS	M	36	14	28	8	2	Rituximab
8	SPMS	M	28	16	25	8	2.5	Rituximab
9	SPMS	F	38	12	30	5	1.5	Rituximab
10	SPMS	F	34	12	30	15	3	Rituximab
11	SPMS	M	34	18	27	15	4	Rituximab
12	SPMS	M	35	12	30	10	1	Ocrelizumab
13	SPMS	F	34	18	28	13	2	Rituximab
14	SPMS	F	44	16	24	15	4	Rituximab
15	SPMS	M	39	16	29	14	2	Ocrelizumab
16	SPMS	F	38	16	27	10	2.5	Rituximab
17	SPMS	F	41	12	25	14	3	Rituximab
18	SPMS	M	36	16	29	7	6	Rituximab
19	SPMS	F	40	12	25	15	2	Rituximab
20	SPMS	F	36	10	27	15	1	Rituximab
21	SPMS	F	55	12	29	15	2.5	Ocrelizumab
22	SPMS	F	35	16	30	10	1.5	Rituximab
23	SPMS	F	39	20	24	15	4	Rituximab
24	SPMS	F	43	12	30	10	2	Rituximab
25	SPMS	F	45	12	29	12	4	Rituximab
