# Supplementary material for: A mechanistic insight into sources of error of visual working memory in multiple sclerosis
Source: eLife. 2023 Nov 8;12:RP87442. doi: 10.7554/eLife.87442 (PMC10631758; doi:10.7554/eLife.87442)
Supplement: Table 2—source data 1. [file elife-87442-table2-data1.xlsx]

## Sheet: Demographic and clinical data
Subject_ID	Participants	Gender	Age	Education	MoCA score	Disease Duration	EDSS	Disease-modifying therapy
1	Healthy	M	24	17	30	N/A	N/A	N/A
2	Healthy	F	55	16	29	N/A	N/A	N/A
3	Healthy	F	23	18	30	N/A	N/A	N/A
4	Healthy	F	23	18	30	N/A	N/A	N/A
5	Healthy	M	24	18	30	N/A	N/A	N/A
6	Healthy	M	24	17	26	N/A	N/A	N/A
7	Healthy	M	25	18	28	N/A	N/A	N/A
8	Healthy	M	25	18	29	N/A	N/A	N/A
9	Healthy	M	31	23	28	N/A	N/A	N/A
10	Healthy	F	31	23	30	N/A	N/A	N/A
11	Healthy	M	24	18	30	N/A	N/A	N/A
12	Healthy	M	41	16	29	N/A	N/A	N/A
13	Healthy	M	27	16	23	N/A	N/A	N/A
14	Healthy	M	25	18	30	N/A	N/A	N/A
15	Healthy	F	50	12	28	N/A	N/A	N/A
16	Healthy	F	37	16	29	N/A	N/A	N/A
17	Healthy	M	25	17	28	N/A	N/A	N/A
18	Healthy	F	23	17	29	N/A	N/A	N/A
19	Healthy	F	32	16	29	N/A	N/A	N/A
20	Healthy	F	28	17	28	N/A	N/A	N/A
21	Healthy	F	29	19	30	N/A	N/A	N/A
22	Healthy	F	25	19	30	N/A	N/A	N/A
23	Healthy	F	24	18	29	N/A	N/A	N/A
24	Healthy	M	25	19	30	N/A	N/A	N/A
25	Healthy	F	35	16	26	N/A	N/A	N/A
26	Healthy	M	41	12	28	N/A	N/A	N/A
27	Healthy	M	32	16	22	N/A	N/A	N/A
28	Healthy	F	33	16	27	N/A	N/A	N/A
29	Healthy	M	59	12	27	N/A	N/A	N/A
30	Healthy	M	25	18	30	N/A	N/A	N/A
31	Healthy	M	25	19	30	N/A	N/A	N/A
32	Healthy	M	23	18	27	N/A	N/A	N/A
33	Healthy	M	22	16	30	N/A	N/A	N/A
34	Healthy	M	22	16	30	N/A	N/A	N/A
35	Healthy	M	21	16	29	N/A	N/A	N/A
36	Healthy	M	26	19	29	N/A	N/A	N/A
37	Healthy	M	23	18	27	N/A	N/A	N/A
38	Healthy	F	31	22	30	N/A	N/A	N/A
39	Healthy	M	50	18	25	N/A	N/A	N/A
40	Healthy	M	27	18	30	N/A	N/A	N/A
41	Healthy	M	25	19	29	N/A	N/A	N/A
42	Healthy	F	53	12	24	N/A	N/A	N/A
43	Healthy	M	23	18	30	N/A	N/A	N/A
44	Healthy	M	25	19	27	N/A	N/A	N/A
45	Healthy	M	21	14	28	N/A	N/A	N/A
46	Healthy	M	24	19	30	N/A	N/A	N/A
1	RRMS	F	41	5	26	5	3.5	Rituximab
2	RRMS	F	23	12	27	8	1	Rituximab
3	RRMS	M	42	18	26	7	1	Rituximab
4	RRMS	F	40	18	25	8	1	Interferon beta-1a
5	RRMS	M	30	16	25	15	1	Fingolimod
6	RRMS	F	30	16	25	10	1	Rituximab
7	RRMS	F	37	16	29	4	2	Dimethyl fumarate
8	RRMS	M	39	7	24	0.83	3	Glatiramer acetate
9	RRMS	F	27	16	26	5	2	Rituximab
10	RRMS	M	31	16	27	9	1	Rituximab
11	RRMS	M	18	12	28	8	1.5	Natalizumab
12	RRMS	F	31	16	27	13	2.5	Rituximab
13	RRMS	M	34	8	25	2	1	Rituximab
14	RRMS	F	47	12	29	9	1	Interferon beta-1a
15	RRMS	M	35	16	24	10	1.5	Rituximab
16	RRMS	M	28	12	29	4	0	Rituximab
17	RRMS	M	28	14	26	3	0	Rituximab
18	RRMS	M	39	8	25	0.67	2	Rituximab
19	RRMS	F	21	7	28	4	0	Rituximab
20	RRMS	F	32	18	30	10	2	Interferon beta-1a
21	RRMS	F	37	16	28	10	0	Interferon beta-1a
22	RRMS	F	32	18	28	6.5	1.5	Rituximab
23	RRMS	F	24	12	28	3	3	Fingolimod
24	RRMS	F	34	12	27	6	0	Fingolimod
25	RRMS	M	39	16	29	9	2.5	Dimethyl fumarate
26	RRMS	M	30	16	27	6.5	3.5	Rituximab
27	RRMS	M	38	16	25	5	2	Rituximab
28	RRMS	M	37	16	26	1.25	1.5	Rituximab
29	RRMS	F	33	12	28	8.5	0	Rituximab
30	RRMS	F	27	12	28	0.75	1	Rituximab
31	RRMS	F	33	16	25	16	2.5	Rituximab
32	RRMS	F	32	16	23	9	1.5	Rituximab
33	RRMS	F	36	12	21	3.5	3	Rituximab
34	RRMS	F	20	14	26	1.75	1	Rituximab
35	RRMS	M	37	16	30	7	0	Rituximab
36	RRMS	F	24	14	28	5	2	Rituximab
37	RRMS	F	32	12	27	11	1	Rituximab
38	RRMS	M	22	16	28	3	1.5	Rituximab
39	RRMS	F	28	18	30	9	2.5	Rituximab
1	SPMS	F	41	12	NAN	1	2.5	Rituximab
2	SPMS	F	35	12	24	4	2.5	Rituximab
3	SPMS	F	38	14	27	13	2	Rituximab
4	SPMS	M	36	12	23	6	5.5	Rituximab
5	SPMS	M	40	12	20	15	1.5	Rituximab
6	SPMS	F	44	12	27	5	4.5	Rituximab
7	SPMS	F	37	16	26	11	3	Rituximab
8	SPMS	F	39	12	29	9	2.5	Interferon beta-1a
9	SPMS	M	31	16	30	9	2	Rituximab
10	SPMS	F	33	12	26	10	5.5	Rituximab
11	SPMS	F	39	12	29	7	5	Rituximab
12	SPMS	F	50	12	24	9	3	Rituximab
13	SPMS	F	47	12	22	12	2.5	Rituximab
14	SPMS	M	27	16	26	11	6	Rituximab
15	SPMS	M	40	12	24	12	3	Rituximab
16	SPMS	F	48	8	25	11	4.5	Rituximab
17	SPMS	M	41	8	20	1.5	2	Rituximab
18	SPMS	F	38	16	28	12	1	Rituximab
19	SPMS	F	48	18	26	6	2	Ocrelizumab
20	SPMS	M	53	16	28	17	2	Rituximab
21	SPMS	F	41	12	28	15	6	Rituximab
22	SPMS	M	38	14	23	7	6	Rituximab
23	SPMS	M	32	16	24	6	5	Rituximab
24	SPMS	F	31	18	28	12.5	3.5	Rituximab
25	SPMS	F	43	18	26	3	6	Ocrelizumab
26	SPMS	F	34	12	27	10	6.5	Rituximab
27	SPMS	F	43	12	29	4	6	Rituximab
28	SPMS	F	33	16	22	18	5	Ocrelizumab
29	SPMS	M	50	12	23	10	2.5	Rituximab
30	SPMS	F	39	18	29	7	6	Rituximab
31	SPMS	F	25	14	25	9	2.5	Rituximab
32	SPMS	F	37	18	26	17	6	Fingolimod
